# Supplementary material for: Acsl4-mediated Lipid Homeostasis Orchestrates Synaptic and Cognitive Plasticity
Source: Research Square preprint supplement (doi:10.21203/rs.3.rs-7437638/v1), 2026-04-28
Supplement: Supplementary file 1 [file 1fc5340a3dc40943155fb22f.xlsx]

## Sheet: C8-pos
Method	Compound_ID	MZ	RT	HMDB_ID	HMDB_specificity (1=match; 2=representative)	Metabolite	CTR1	CTR2	CTR3	CTR4	KO1	KO2	KO3	KO4
C8-pos	TF01	622.444	6.64	Internal standard	NA	PC 12:0/12:0 [iSTD]	8.11183e+07	7.53921e+07	7.99462e+07	8.30226e+07	7.95672e+07	7.97803e+07	8.13361e+07	8.20192e+07
C8-pos	QI02959	494.324	4.66	HMDB0010383	2	LPC 16:1	13515.3	17346	19355	19623	20457.9	27970.9	27538.7	22409.6
C8-pos	QI03238	496.339	5	HMDB0010382	1	LPC 16:0	1.71292e+06	2.42994e+06	3.00594e+06	2.47694e+06	2.59303e+06	3.76791e+06	4.35106e+06	2.99611e+06
C8-pos	QI03129	520.34	4.84	HMDB0010386	2	LPC 18:2	12109.9	17773.6	17159.1	18821.3	17177.4	32261	25101.9	19440
C8-pos	QI03326	522.355	5.17	HMDB0002815	2	LPC 18:1	421760	582038	705361	600472	654575	942724	1.02436e+06	731305
C8-pos	QI03517	524.371	5.57	HMDB0010384	1	LPC 18:0	913914	1.27425e+06	1.45456e+06	1.26051e+06	1.43499e+06	1.99898e+06	2.34466e+06	1.61026e+06
C8-pos	QI03071	544.339	4.77	HMDB0010395	1	LPC 20:4	134422	188580	227966	190730	193939	293052	259216	193378
C8-pos	QI03263	546.355	5.05	HMDB0010393	2	LPC 20:3	2768.63	5057.48	6318.24	4984.82	4948.52	9947.73	9087.98	5404.13
C8-pos	QI03565	550.386	5.71	HMDB0010391	1	LPC 20:1	26667.5	42236.4	47977.9	41017.3	47567	68578.8	71868.8	52619.9
C8-pos	QI03759	552.402	6.2	HMDB0010390	1	LPC 20:0	13412.8	18810.6	18083.1	17743.2	28381.7	27648	43862.2	31827.3
C8-pos	QI03130	568.339	4.84	HMDB0010404	1	LPC 22:6	54268.8	59513.5	80368.6	70804.3	98766	141332	93772.9	71245.9
C8-pos	QI03332	530.323	5.18	HMDB0010401	1	LPC 22:4	10963.4	17375.4	16686.5	18029.1	16980.2	24557.1	26305.5	20399.3
C8-pos	QI03998	608.465	7.47	HMDB0010405	1	LPC 24:0	30064.3	45749	49345.2	49565.4	64047.9	66073.5	116218	89647
C8-pos	TF03	480.345	5.3	NA	NA	LPC P-16:0 or LPC O-16:1	85265.8	144852	166180	153388	148576	262945	270821	174571
C8-pos	TF04	508.377	5.92	NA	NA	LPC P-18:0 or LPC O-18:1	11455.8	43982.7	41284	34942.8	41050.6	80159.7	87798.4	56771.6
C8-pos	QI03247	454.292	5.02	HMDB0011503	1	LPE 16:0	32272.3	47822.3	54881.7	42166.1	42341.8	69048.1	70720.4	51061.2
C8-pos	QI03331	480.308	5.18	HMDB0011506	2	LPE 18:1	23048.8	32951.3	35938.5	32031.5	34921.7	51295.1	53426	40223.2
C8-pos	QI03520	482.324	5.58	HMDB0011130	1	LPE 18:0	140488	177195	210757	188130	200370	302648	280733	217042
C8-pos	QI03081	502.292	4.78	HMDB0011517	1	LPE 20:4	42671.5	69879.9	68462.4	66513.1	63627.1	107170	91937.4	68367.7
C8-pos	TF05	508.339	5.59	HMDB0011512	2	LPE 20:1	110191	168864	151005	178938	201117	242953	307177	249749
C8-pos	QI03362	510.355	5.27	HMDB0011481	1	LPE 20:0	3.6504e+06	3.45414e+06	3.51325e+06	3.69756e+06	3.54799e+06	3.58737e+06	3.59594e+06	3.60715e+06
C8-pos	QI03070	526.293	4.77	HMDB0011526	1	LPE 22:6	140778	214219	241051	235772	228243	359960	295560	236360
C8-pos	QI03640	538.387	5.88	HMDB0011520	1	LPE 22:0	6139.88	7043.47	5999.75	5544.45	8711.37	9600.94	11992.1	8231.63
C8-pos	QI04083	704.522	7.91	HMDB0007870	2	PC 30:1	49895.9	66191	72154.8	71984	89497.3	101048	124248	98070.9
C8-pos	QI04203	706.538	8.26	HMDB0007869	2	PC 30:0	3.7993e+06	5.50041e+06	5.81493e+06	5.68329e+06	5.66941e+06	7.52125e+06	8.76438e+06	6.98402e+06
C8-pos	QI04115	730.538	8.07	HMDB0007874	2	PC 32:2	124741	172566	170747	167906	200082	255147	271903	228412
C8-pos	QI04302	732.553	8.42	HMDB0007873	2	PC 32:1	1.49784e+07	2.1292e+07	2.28175e+07	2.14424e+07	2.21007e+07	2.85734e+07	3.3636e+07	2.66744e+07
C8-pos	QI04511	734.569	8.72	HMDB0007871	2	PC 32:0	2.49479e+08	337505498	3.42255e+08	320127407	2.95541e+08	3.74421e+08	3.98961e+08	3.49276e+08
C8-pos	QI04129	754.538	8.1	HMDB0007883	2	PC 34:4	58694.5	84073	85473.3	91438.7	76337.4	109724	114939	99759.5
C8-pos	QI04277	756.553	8.36	HMDB0008006	2	PC 34:3	251046	429393	406358	373049	369847	578279	584827	463085
C8-pos	QI04388	758.568	8.56	HMDB0007973	2	PC 34:2	1.33433e+07	2.33516e+07	2.17732e+07	2.03349e+07	1.79874e+07	2.97251e+07	2.95558e+07	2.31422e+07
C8-pos	QI04604	760.585	8.87	HMDB0007972	2	PC 34:1	4.23205e+08	5.63893e+08	5.88365e+08	5.50047e+08	5.22486e+08	626164897	6.95167e+08	5.99685e+08
C8-pos	QI04789	762.6	9.16	HMDB0007970	2	PC 34:0	6.25014e+07	9.89635e+07	1.04209e+08	9.49189e+07	7.73582e+07	1.14558e+08	1.23969e+08	1.04167e+08
C8-pos	QI04410	782.569	8.59	HMDB0008138	2	PC 36:4	7.58897e+07	1.18484e+08	1.23233e+08	1.1471e+08	9.30336e+07	140507848	1.53648e+08	1.23463e+08
C8-pos	TF06	784.584	8.72	HMDB0008105	2	PC 36:3	5.72754e+07	1.06876e+08	102788049	8.67585e+07	7.09306e+07	1.2144e+08	1.32959e+08	9.4165e+07
C8-pos	QI04672	786.6	9	HMDB0008039	2	PC 36:2	5.22531e+07	7.63202e+07	7.61852e+07	7.31894e+07	7.06921e+07	8.95773e+07	9.84153e+07	8.38653e+07
C8-pos	QI04899	788.616	9.3	HMDB0008038	2	PC 36:1	1.82718e+08	2.61291e+08	2.63836e+08	2.54112e+08	2.44949e+08	3.10608e+08	3.60768e+08	3.0028e+08
C8-pos	TF07	790.632	9.58	HMDB0008036	2	PC 36:0	1.30246e+07	2.2665e+07	2.32009e+07	2.25427e+07	1.94658e+07	2.75794e+07	3.43726e+07	2.72691e+07
C8-pos	QI04362	806.568	8.52	HMDB0007991	2	PC 38:6	6.38319e+07	1.00022e+08	1.0704e+08	1.01157e+08	8.11715e+07	1.1986e+08	1.38183e+08	1.07539e+08
C8-pos	QI04694	810.6	9.04	HMDB0008048	2	PC 38:4	1.04033e+08	156761114	1.66763e+08	1.47038e+08	1.24361e+08	1.74616e+08	1.95797e+08	1.57357e+08
C8-pos	TF08	812.615	9.17	HMDB0008047	2	PC 38:3	3.008e+07	4.86524e+07	5.29953e+07	4.07331e+07	4.05272e+07	6.49294e+07	7.06962e+07	4.62287e+07
C8-pos	QI04972	814.631	9.38	HMDB0008270	2	PC 38:2	5.80294e+06	9.87281e+06	9.57043e+06	9.40935e+06	1.00449e+07	1.27484e+07	1.55057e+07	1.23694e+07
C8-pos	TF09	826.538	8.19	HMDB0008511	2	PC 40:10	134799	188328	197510	218788	206603	228085	333238	283411
C8-pos	TF10	828.55	8.52	HMDB0008731	2	PC 40:9	2.74532e+07	3.88596e+07	4.12067e+07	3.94893e+07	3.22674e+07	4.18758e+07	4.42536e+07	3.91972e+07
C8-pos	QI04661	834.6	8.97	HMDB0008057	2	PC 40:6	3.49673e+07	5.06339e+07	5.55446e+07	5.04315e+07	3.98115e+07	5.59757e+07	6.32554e+07	5.15485e+07
C8-pos	QI04727	738.542	9.09	HMDB0011214	2	PC P-34:4 or PC O-34:5	79492.3	126944	109134	107244	114815	147818	162990	137339
C8-pos	TF11	742.573	9.03	HMDB0011211	2	PC P-34:2 or PC O-34:3	1.19558e+06	1.19472e+06	1.26259e+06	1.25335e+06	1.1289e+06	1.19377e+06	1.26105e+06	1.20657e+06
C8-pos	QI04768	744.59	9.14	HMDB0011210	2	PC P-34:1 or PC O-34:2	1.2395e+06	1.96543e+06	1.99614e+06	1.88328e+06	1.98999e+06	2.54531e+06	3.22179e+06	2.43897e+06
C8-pos	QI04770	746.606	9.14	HMDB0011208	2	PC P-34:0 or PC O-34:1_A	6.06868e+06	1.01734e+07	1.08155e+07	9.66384e+06	8.40915e+06	1.25381e+07	1.55853e+07	1.14059e+07
C8-pos	QI05008	746.605	9.44	HMDB0011239	2	PC P-34:0 or PC O-34:1_B	619682	1.12551e+06	1.12061e+06	1.06138e+06	866550	1.37416e+06	1.44765e+06	1.23278e+06
C8-pos	TF12	766.579	8.51	HMDB0011221	2	PC P-36:4 or PC O-36:5_A	1.98057e+07	2.80095e+07	2.76079e+07	2.72323e+07	2.91016e+07	2.87958e+07	3.42493e+07	3.23293e+07
C8-pos	TF13	766.573	8.85	HMDB0011220	2	PC P-36:4 or PC O-36:5_B	2.1174e+06	2.75277e+06	2.73099e+06	2.21383e+06	2.93056e+06	2.80116e+06	3.21252e+06	2.69199e+06
C8-pos	TF14	768.587	9.14	HMDB0011310	2	PC P-36:3 or PC O-36:4	2.44943e+06	3.75638e+06	4.11568e+06	3.75553e+06	3.29898e+06	4.48328e+06	4.72297e+06	3.95752e+06
C8-pos	QI04873	770.605	9.25	HMDB0011244	2	PC P-36:2 or PC O-36:3	887725	1.22578e+06	1.04444e+06	1.11894e+06	1.45852e+06	1.5336e+06	1.6739e+06	1.4832e+06
C8-pos	TF15	772.62	9.26	HMDB0011243	2	PC P-36:1 or PC O-36:2	2.77241e+06	4.23753e+06	4.15077e+06	4.22832e+06	4.19226e+06	5.1307e+06	6.7357e+06	5.10341e+06
C8-pos	QI05122	774.636	9.58	HMDB0011241	2	PC P-36:0 or PC O-36:1	633198	1.21946e+06	1.21587e+06	1.14507e+06	1.15459e+06	1.51255e+06	2.14755e+06	1.57608e+06
C8-pos	QI04565	790.573	8.8	HMDB0011229	2	PC P-38:6 or PC O-38:7	378675	543876	585852	540065	477743	667569	726750	586703
C8-pos	TF16	792.589	8.83	HMDB0011319	2	PC P-38:5 or PC O-38:6	4.27416e+06	6.42651e+06	6.77806e+06	6.31556e+06	5.30123e+06	8.12411e+06	9.45427e+06	6.10876e+06
C8-pos	QI04830	796.62	9.2	HMDB0011252	2	PC P-38:3 or PC O-38:4	107937	190615	202804	164698	143288	240753	274412	181356
C8-pos	QI04867	818.605	9.23	HMDB0011294	2	PC P-40:6 or PC O-40:7	244966	351580	373076	357396	313503	417373	434092	413413
C8-pos	QI04300	690.506	8.42	HMDB0008924	2	PE 32:1	78335.8	115646	112354	102523	114170	148019	157944	122118
C8-pos	TF17	692.523	8	HMDB0008923	2	PE 32:0	66241.6	166316	127107	172989	144205	264757	263380	195996
C8-pos	QI04387	716.521	8.56	HMDB0008928	2	PE 34:2	268599	426034	419415	364990	352114	542592	554595	425592
C8-pos	QI04333	720.553	8.5	HMDB0008925	2	PE 34:0	1.2484e+06	2.59754e+06	2.02909e+06	2.10283e+06	1.70464e+06	3.07927e+06	2.70485e+06	2.43742e+06
C8-pos	QI04407	740.521	8.59	HMDB0008937	2	PE 36:4	3.27492e+06	5.05722e+06	5.39179e+06	4.81387e+06	4.17692e+06	6.29822e+06	7.17387e+06	5.38003e+06
C8-pos	TF18	742.538	9.16	HMDB0009060	2	PE 36:3	3.36306e+06	3.79329e+06	4.14392e+06	3.59862e+06	3.72205e+06	4.65591e+06	5.32434e+06	4.06873e+06
C8-pos	QI04670	744.553	9	HMDB0008994	2	PE 36:2	4.50345e+06	6.2459e+06	6.00886e+06	5.84072e+06	5.73515e+06	6.93766e+06	7.02881e+06	6.64931e+06
C8-pos	QI04892	746.569	9.29	HMDB0008993	2	PE 36:1	6.76724e+06	9.87204e+06	9.48797e+06	9.14151e+06	9.0278e+06	1.12961e+07	1.27458e+07	1.09214e+07
C8-pos	QI04646	748.585	8.95	HMDB0008991	2	PE 36:0	2.15428e+06	3.89983e+06	3.17551e+06	3.35792e+06	2.55109e+06	4.17592e+06	3.54343e+06	3.51733e+06
C8-pos	QI04357	764.522	8.52	HMDB0009102	2	PE 38:6	1.32075e+07	1.94597e+07	2.10279e+07	1.97288e+07	1.62961e+07	2.29938e+07	2.64991e+07	2.10886e+07
C8-pos	QI04513	766.536	8.72	HMDB0009069	2	PE 38:5	4.54244e+06	6.13443e+06	6.45012e+06	5.81229e+06	5.79284e+06	7.42947e+06	8.66377e+06	6.78373e+06
C8-pos	QI04690	768.554	9.04	HMDB0009003	2	PE 38:4	2.92785e+07	4.41032e+07	4.59493e+07	4.11408e+07	3.59999e+07	5.02099e+07	5.36208e+07	4.50121e+07
C8-pos	TF19	772.585	9.37	HMDB0008942	2	PE 38:2	7.99547e+06	8.5154e+06	8.64013e+06	8.27521e+06	9.13957e+06	9.94005e+06	1.37879e+07	1.11792e+07
C8-pos	QI04657	792.553	8.97	HMDB0009012	2	PE 40:6	4.14146e+07	5.88094e+07	6.35319e+07	5.82606e+07	4.65851e+07	6.42947e+07	7.01518e+07	6.11632e+07
C8-pos	QI04593	700.528	8.85	HMDB0011343	2	PE P-34:2 or PE O-34:3	203248	288224	239586	230523	338340	341813	320816	296946
C8-pos	QI04782	702.543	9.15	HMDB0008952	2	PE P-34:1 or PE O-34:2	5.05776e+06	7.91585e+06	7.85182e+06	7.58844e+06	7.72713e+06	9.8168e+06	1.19644e+07	9.69025e+06
C8-pos	QI04603	724.527	8.87	HMDB0011410	2	PE P-36:4 or PE O-36:5	1.63457e+06	2.05956e+06	2.05822e+06	2.1194e+06	2.12913e+06	2.15776e+06	2.37164e+06	2.39087e+06
C8-pos	QI04677	726.542	9.01	HMDB0011442	2	PE P-36:3 or PE O-36:4	447872	754399	691714	648433	649909	826864	947212	790815
C8-pos	QI04881	728.558	9.26	HMDB0011441	2	PE P-36:2 or PE O-36:3	1.07624e+07	1.5054e+07	1.29061e+07	1.36245e+07	1.66196e+07	1.81197e+07	1.99904e+07	1.76531e+07
C8-pos	QI05105	730.574	9.56	HMDB0009082	2	PE P-36:1 or PE O-36:2	6.75001e+06	1.06338e+07	1.00453e+07	1.01696e+07	1.06333e+07	1.32484e+07	1.51845e+07	1.26457e+07
C8-pos	QI04559	748.527	8.8	HMDB0011420	2	PE P-38:6 or PE O-38:7	1.51842e+07	2.16286e+07	2.34349e+07	2.00677e+07	18322691	2.47834e+07	2.84188e+07	2.22954e+07
C8-pos	QI04664	750.543	8.98	HMDB0011387	2	PE P-38:5 or PE O-38:6	5.97096e+06	8.55877e+06	7.92825e+06	7.86977e+06	8.48613e+06	9.69508e+06	1.11081e+07	9.62524e+06
C8-pos	QI04896	752.558	9.3	HMDB0011386	2	PE P-38:4 or PE O-38:5	6.55413e+06	9.65227e+06	9.03379e+06	9.36035e+06	8.18433e+06	1.12882e+07	1.17522e+07	1.07847e+07
C8-pos	QI04861	776.559	9.23	HMDB0011394	2	PE P-40:6 or PE O-40:7	2.99662e+07	4.12335e+07	4.14018e+07	3.92755e+07	3.58812e+07	4.82774e+07	4.96326e+07	4.33409e+07
C8-pos	TF20	796.524	8.92	NA	NA	PE P-42:10 or PE O-42:11	3.64136e+06	3.49969e+06	3.67573e+06	3.65948e+06	3.54835e+06	3.33736e+06	3.2615e+06	3.87844e+06
C8-pos	TF21	809.515	8.38	HMDB0009779	2	PI 32:1	908720	1.56273e+06	1.60172e+06	1.35435e+06	1.04235e+06	1.66614e+06	1.82107e+06	1.47687e+06
C8-pos	TF22	835.531	8.52	HMDB0009784	2	PI 34:2	2.56314e+06	4.04319e+06	4.07339e+06	3.73301e+06	3.15813e+06	4.19996e+06	4.74908e+06	4.1399e+06
C8-pos	TF23	837.546	8.86	HMDB0009783	2	PI 34:1	8.7865e+07	1.28137e+08	1.30708e+08	1.12494e+08	9.97877e+07	1.20543e+08	1.33834e+08	1.14667e+08
C8-pos	QI04776	839.562	9.14	HMDB0009805	2	PI 34:0	68079.5	137257	163037	113511	81721.5	145157	184332	112813
C8-pos	TF24	859.533	8.39	HMDB0009789	2	PI 36:4	1.15465e+06	1.82597e+06	2.13114e+06	1.71705e+06	1.43361e+06	2.24203e+06	2.559e+06	2.02821e+06
C8-pos	TF25	887.563	8.9	HMDB0009815	2	PI 38:4	6.44166e+06	9.28215e+06	9.64026e+06	8.30745e+06	7.08481e+06	8.80533e+06	9.79902e+06	8.9233e+06
C8-pos	TF26	762.526	8.76	HMDB0012357	2	PS 34:1	4.5835e+06	7.58968e+06	7.4865e+06	6.69837e+06	5.53194e+06	8.2684e+06	9.04827e+06	7.35721e+06
C8-pos	TF27	784.512	8.45	HMDB0012361	2	PS 36:4	469944	998900	945976	781229	638473	1.18751e+06	1.34276e+06	802148
C8-pos	TF28	788.542	8.89	HMDB0012380	2	PS 36:2	1.06308e+07	1.61346e+07	1.54628e+07	1.33266e+07	1.35239e+07	1.51652e+07	1.66238e+07	1.39774e+07
C8-pos	TF29	790.558	9.22	HMDB0010163	2	PS 36:1	6.41153e+07	9.11868e+07	8.12957e+07	7.51153e+07	9.1712e+07	1.01644e+08	1.09797e+08	9.39095e+07
C8-pos	TF30	808.512	8.39	HMDB0012362	2	PS 38:6	1.77942e+06	3.14615e+06	3.20121e+06	2.72951e+06	2.09871e+06	3.54565e+06	3.77019e+06	2.98991e+06
C8-pos	TF31	812.543	8.94	HMDB0012383	2	PS 38:4	1.37388e+07	2.10576e+07	1.82816e+07	1.67845e+07	1.85843e+07	2.1212e+07	2.50508e+07	2.04374e+07
C8-pos	TF32	836.543	8.86	HMDB0010167	2	PS 40:6	1.72144e+08	2.45391e+08	2.54894e+08	2.1866e+08	1.92263e+08	2.40961e+08	2.52364e+08	226684445
C8-pos	QI02663	300.289	4.38	HMDB0000252	1	Sphingosine	62736	92306.6	96263.7	83361.8	74861.5	99279.9	130174	99306.6
C8-pos	QI03311	300.289	5.16	HMDB0002100	1	Palmitoyl-EA	58561.8	61461.4	63152.6	61542.5	60443.4	63555.7	64842.6	62174.4
C8-pos	QI03610	326.305	5.8	HMDB0002088	1	Oleoyl-EA	2931.86	496.438	115.391	284.75	211.364	572.482	172.896	235.552
C8-pos	TF33	383.331	7.12	HMDB0003896	1	7-Dehydro-desmosterol	431703	656578	770097	651440	498349	689480	892512	721675
C8-pos	QI04010	369.351	7.49	HMDB0000067	1	Cholesterol	4.63844e+06	6.89838e+06	6.57951e+06	6.55793e+06	6.44213e+06	8.34781e+06	9.55881e+06	8.01729e+06
C8-pos	QI04014	401.377	7.49	HMDB0002869	1	Campesterol	20294.5	32530.5	29753.8	31433.9	30151.9	39040.6	44267.4	38696.3
C8-pos	QI05484	817.61	10.48	HMDB0006707	1	Coenzyme Q9	845193	1.15013e+06	1.25637e+06	1.13161e+06	969036	1.30266e+06	1.44673e+06	1.18379e+06
C8-pos	QI05578	885.673	11.08	HMDB0001072	1	Coenzyme Q10	318301	473560	527438	474814	362517	562986	658585	495133
C8-pos	TF34	431.378	7.98	HMDB0001893	1	alpha-Tocopherol	4.05739e+06	4.94946e+06	4.15952e+06	3.5754e+06	5.00903e+06	5.87835e+06	5.19166e+06	3.88516e+06
C8-pos	QI04306	538.519	8.43	HMDB0004949	1	Cer 18:1;O2/16:0	111484	140475	222325	144881	144859	193694	285496	197854
C8-pos	QI05228	622.613	9.76	HMDB0004952	1	Cer 18:1;O2/22:0	77720.6	95292.5	126780	90318.2	105557	131484	176253	127653
C8-pos	QI05278	648.629	9.81	HMDB0004953	2	Cer 18:1;O2/24:1	550271	783953	989883	765216	794834	1.02627e+06	1.34063e+06	1.17117e+06
C8-pos	QI05431	650.644	10.16	HMDB0004956	1	Cer 18:1;O2/24:0	34255	43379.3	59643.5	42018.3	45722.8	54438.3	75357.1	58219.3
C8-pos	QI04074	675.543	7.8	HMDB0012097	1	SM 18:1;O2/14:0	16184.9	27349.2	25275.1	22238.7	31683.6	36428.6	55311.1	34099.3
C8-pos	QI04084	701.558	7.95	HMDB0240613	2	SM 18:1;O2/16:1	41209.9	58843.6	51491.9	47063.8	86793.4	76210.6	107738	71189.6
C8-pos	QI04215	703.574	8.3	HMDB0010169	1	SM 18:1;O2/16:0	1.48124e+06	2.26657e+06	2.27351e+06	1.9396e+06	2.48676e+06	2.92037e+06	3.86914e+06	2.54656e+06
C8-pos	QI04321	729.59	8.47	HMDB0012101	2	SM 18:1;O2/18:1	2.5609e+06	5.18018e+06	4.3925e+06	4.4181e+06	4.33333e+06	6.39466e+06	7.44774e+06	5.04178e+06
C8-pos	QI04556	731.606	8.79	HMDB0001348	1	SM 18:1;O2/18:0	4.84116e+07	7.91233e+07	7.88472e+07	6.82641e+07	6.23359e+07	8.77409e+07	9.837e+07	7.54991e+07
C8-pos	QI04849	759.637	9.22	HMDB0012102	1	SM 18:1;O2/20:0	5.09363e+06	8.03461e+06	7.50491e+06	6.80891e+06	7.22666e+06	9.82746e+06	1.01946e+07	8.01606e+06
C8-pos	QI04904	785.653	9.31	HMDB0012104	2	SM 18:1;O2/22:1	1.20793e+06	1.16745e+06	1.05453e+06	1.01765e+06	2.06496e+06	1.41799e+06	1.79517e+06	1.45846e+06
C8-pos	QI05174	787.668	9.66	HMDB0012103	1	SM 18:1;O2/22:0	1.5731e+06	2.12382e+06	1.93911e+06	1.73701e+06	2.98073e+06	2.95318e+06	3.68493e+06	2.39255e+06
C8-pos	QI05203	813.684	9.71	HMDB0012107	2	SM 18:1;O2/24:1	6.50365e+06	1.11912e+07	9.61377e+06	9.90495e+06	1.23184e+07	1.54596e+07	1.87932e+07	1.32315e+07
C8-pos	TF35	815.7	10.08	HMDB0011697	1	SM 18:1;O2/24:0	6.99568e+06	1.1727e+07	1.07504e+07	9.8983e+06	1.24055e+07	1.57705e+07	1.75485e+07	1.31996e+07
C8-pos	QI05762	645.558	11.69	HMDB0000658	2	CE 16:1	25221.7	37132.2	38748.7	25105.7	38631.9	39251.8	51249.3	32210.5
C8-pos	QI05837	647.574	11.99	HMDB0000885	1	CE 16:0	16264.5	21869.4	28331.9	16378.9	28740.8	32370	83875.8	20807.5
C8-pos	QI05789	671.573	11.78	HMDB0000610	2	CE 18:2	80089.3	84636	93867.8	77461.6	113542	105756	125002	107049
C8-pos	QI05861	673.589	12.08	HMDB0000918	2	CE 18:1	47631.8	71378.3	86646	45335.5	95178.2	91760.5	158737	80135.5
C8-pos	QI05658	693.558	11.39	HMDB0006731	1	CE 20:5	10613.6	5684.34	7124.93	4324.33	16467.3	6673.78	21997	3996.87
C8-pos	QI05744	695.573	11.64	HMDB0006726	1	CE 20:4	121356	147684	194973	144710	158450	186204	280599	174940
C8-pos	QI05693	719.573	11.51	HMDB0006733	1	CE 22:6	78102.1	78649.1	117669	68951.4	106083	129791	429660	90721.6
C8-pos	QI02835	323.219	4.54	HMDB0011562	2	MG 14:1	11589.3	11406.2	11612	12066.6	11602.8	11461	11169.5	11800
C8-pos	QI03278	339.25	5.08	HMDB0011565	2	MG 16:1	248300	261152	264713	233857	218732	276166	240383	239084
C8-pos	QI03705	381.297	5.98	HMDB0011131	1	MG 18:0	2.72664e+07	2.75984e+07	2.84138e+07	2.70694e+07	2.58285e+07	2.87544e+07	2.65206e+07	2.64095e+07
C8-pos	QI03301	401.266	5.12	NA	NA	MG 20:4	21187.8	47287.8	41773.8	39194.2	21847.6	58584.7	60978.4	40446.2
C8-pos	QI04639	584.525	8.94	HMDB0007099	2	DG 32:1	33960.5	34764.2	28030.9	28332	46388.3	36731.5	47253.9	33597.5
C8-pos	QI04812	591.495	9.19	HMDB0007098	2	DG 32:0	382807	189999	259941	205274	282514	134762	85664.6	146877
C8-pos	QI04717	615.495	9.08	HMDB0007103	2	DG 34:2	31789.6	26395.2	22552.3	27269.9	28858.6	30247.5	15076.8	30964.3
C8-pos	QI04939	617.511	9.35	HMDB0007102	2	DG 34:1	645276	614913	670824	646276	588938	601808	602336	613233
C8-pos	QI05167	619.527	9.65	HMDB0007100	2	DG 34:0	1.30584e+06	994478	1.46307e+06	1.10145e+06	1.51607e+06	943907	760633	856492
C8-pos	TF36	639.495	9.08	HMDB0007248	2	DG 36:4	2.3665e+06	2.8906e+06	2.42628e+06	2.68683e+06	2.586e+06	2.95108e+06	2.86286e+06	2.71178e+06
C8-pos	QI05046	643.527	9.48	HMDB0007218	2	DG 36:2	232113	270316	269761	253387	238604	263689	263676	281387
C8-pos	QI05229	645.543	9.76	HMDB0007216	2	DG 36:1	736655	936098	966154	871321	884322	971160	1.0642e+06	1.01839e+06
C8-pos	QI05373	647.558	10	HMDB0007158	2	DG 36:0	987299	887597	1.21498e+06	958175	1.77123e+06	929036	965610	966499
C8-pos	TF37	665.506	9.19	HMDB0007199	2	DG 38:5	863311	904987	903305	968332	871646	810519	987743	765873
C8-pos	QI05052	667.527	9.49	HMDB0007170	2	DG 38:4	1.11305e+06	1.66177e+06	1.51683e+06	1.41719e+06	1.28479e+06	1.68306e+06	1.78793e+06	1.38736e+06
C8-pos	QI05551	745.632	10.94	HMDB0072780	2	TG 42:0	21394.9	28403.2	23792.8	20339.2	20789.4	28136.1	17332.6	16142
C8-pos	TF38	759.646	11.1	HMDB0042062	2	TG 43:0	250965	407673	296356	278756	284966	331147	250351	249276
C8-pos	QI05572	766.691	11.06	HMDB0042301	2	TG 44:1	13327	25317.7	13741.7	10231.4	13043.4	22184.3	6523	7485.43
C8-pos	QI05618	773.663	11.25	HMDB0042063	2	TG 44:0	71658.9	96445.6	69802.1	67715.4	67703.9	81896.2	62326.6	63335.3
C8-pos	QI05664	787.678	11.4	HMDB0042093	2	TG 45:0	78597.1	103436	80552.8	74820.9	70927.2	93733.4	64958.4	63916.1
C8-pos	QI05646	799.678	11.36	HMDB0010412	2	TG 46:1	20901	35343.5	25374.3	18993.7	23708.1	33792.7	16216	14445.5
C8-pos	QI05713	801.694	11.56	HMDB0010411	2	TG 46:0	160038	202623	165762	157399	146866	192280	150699	143132
C8-pos	QI05699	813.694	11.52	HMDB0042100	2	TG 47:1	21193.2	38691.3	25965.3	17289.9	22487.8	34350.3	11461.9	14000.3
C8-pos	QI05776	815.709	11.72	HMDB0042094	2	TG 47:0	111981	148767	119990	110017	106898	137687	96304.2	100631
C8-pos	QI05688	825.694	11.49	HMDB0005376	2	TG 48:2	21155.9	38803.6	18565.8	15139.1	21682.8	33071.4	13579.2	14286.4
C8-pos	QI05747	827.709	11.65	HMDB0005359	2	TG 48:1	70161.3	143508	109443	89681.5	109414	153374	121449	99013.6
C8-pos	QI05811	829.725	11.87	HMDB0005356	2	TG 48:0	364036	584401	562161	475660	439546	672734	675811	518566
C8-pos	QI05800	836.77	11.82	HMDB0011705	2	TG 49:1	59048.8	111512	62765.6	47811.5	58704.2	95911.9	40617.4	40814.3
C8-pos	QI05852	843.741	12.04	HMDB0042095	2	TG 49:0	54058.1	77841.4	60222.6	61907.7	53006.6	75542	50653.7	50476.8
C8-pos	TF43	851.71	11.51	HMDB0005433	2	TG 50:3	182485	355881	250988	259164	233997	284585	268583	217474
C8-pos	QI05779	853.725	11.73	HMDB0005377	2	TG 50:2	83779.8	195255	159506	152284	152507	214264	207330	162767
C8-pos	QI05830	855.741	11.96	HMDB0005360	2	TG 50:1	361791	779165	733160	633644	617209	963212	1.04205e+06	700923
C8-pos	QI05887	857.756	12.2	HMDB0005357	2	TG 50:0	312668	537304	530170	464169	414130	622607	679663	522103
C8-pos	TF44	869.757	12.14	HMDB0042104	2	TG 51:1	68166	212652	105442	103059	136075	236516	136067	95515.9
C8-pos	TF45	871.771	12.4	HMDB0031106	2	TG 51:0	163901	247048	169523	180930	127731	258034	190820	158212
C8-pos	QI05723	872.77	11.59	HMDB0005363	2	TG 52:4	50290.6	83053	80009.2	99004.5	57510.5	82680.8	95010.4	75500.3
C8-pos	QI05797	874.785	11.81	HMDB0005384	2	TG 52:3	195760	394817	366427	358800	303078	423928	457441	345794
C8-pos	QI05856	876.801	12.05	HMDB0005369	2	TG 52:2	560854	1.22083e+06	1.11571e+06	883423	1.07595e+06	1.45498e+06	1.5837e+06	1.06139e+06
C8-pos	QI05902	878.817	12.29	HMDB0005367	2	TG 52:1	519547	1.05096e+06	994240	876105	879325	1.32597e+06	1.46317e+06	1.02401e+06
C8-pos	QI05949	885.788	12.56	HMDB0005365	2	TG 52:0	157881	238434	240232	218607	179466	278762	275857	225417
C8-pos	QI05659	894.754	11.39	HMDB0005447	2	TG 54:7	34294.5	78448.6	82490.6	76739.9	71483.4	105446	117349	78802.3
C8-pos	QI05732	896.77	11.61	HMDB0005391	2	TG 54:6	475609	1.12856e+06	1.08219e+06	1.06146e+06	771453	1.46344e+06	1.62955e+06	1.03277e+06
C8-pos	QI05790	898.785	11.78	HMDB0005385	2	TG 54:5	132470	252616	265286	259965	216671	306233	359948	263061
C8-pos	QI05815	900.801	11.91	HMDB0005370	2	TG 54:4	100888	225490	184484	199677	140102	231227	224531	196624
C8-pos	QI05875	902.817	12.14	HMDB0005405	2	TG 54:3	216679	472749	377639	301180	385442	491237	533593	373611
C8-pos	QI05919	904.833	12.38	HMDB0005403	2	TG 54:2	177841	380265	342967	246466	381349	473026	540911	370849
C8-pos	QI05969	906.848	12.65	HMDB0005395	2	TG 54:1	81434.8	151464	130854	123221	133918	184731	199350	145872
C8-pos	QI05684	920.77	11.47	HMDB0005392	2	TG 56:8	63145.9	129394	141643	125972	95729.2	175192	186451	124417
C8-pos	QI05764	922.785	11.69	HMDB0005462	2	TG 56:7	536887	1.23439e+06	1.25111e+06	1.10659e+06	907688	1.56633e+06	1.76815e+06	1.19234e+06
C8-pos	QI05820	924.801	11.92	HMDB0005456	2	TG 56:6	366866	865996	870687	789671	588013	1.07184e+06	1.19852e+06	817687
C8-pos	QI05866	926.817	12.1	HMDB0005406	2	TG 56:5	114118	225413	235940	197809	226763	274349	346227	230731
C8-pos	QI05892	928.832	12.24	HMDB0005398	2	TG 56:4	22494	73662.7	70737.7	48758.4	69104.2	91317.9	105290	75126.1
C8-pos	TF47	935.801	12.48	HMDB0005410	2	TG 56:3	71282.8	181454	160292	94031.5	184876	237257	291481	163309
C8-pos	QI05674	944.77	11.44	HMDB0005476	2	TG 58:10	99091.8	222061	212780	217905	139328	274449	289141	195032
C8-pos	QI05719	946.786	11.57	HMDB0005463	2	TG 58:9	33577.9	84942.9	88783.9	81707.5	52034.9	107476	123505	74004.7
C8-pos	QI05785	948.802	11.77	HMDB0005413	2	TG 58:8	78867.7	134209	145804	126306	119703	174283	200825	139423
C8-pos	QI05838	950.817	11.99	HMDB0005471	2	TG 58:7	74544.9	186594	172569	157287	147486	236287	272499	178544
C8-pos	QI05893	952.833	12.24	HMDB0005458	2	TG 58:6	11860.1	42473.6	43912.1	34059.1	32073.6	56333.8	65577	35459.3
C8-pos	QI05648	968.77	11.36	HMDB0005478	2	TG 60:12	206491	457152	463261	446335	317116	609866	644114	446787

## Sheet: C18-neg
Method	Compound_ID	MZ	RT	HMDB_ID	HMDB_specificity (1=match; 2=representative)	Metabolite	CTR1	CTR2	CTR3	CTR4	KO1	KO2	KO3	KO4
C18-neg	TF01	347.223	9.89	internal standard	NA	15R-15-methyl PGA2 [iSTD]	1.65169e+07	1.56634e+07	1.67503e+07	1.66099e+07	1.64833e+07	1.69061e+07	1.58846e+07	1.66707e+07
C18-neg	TF02	367.249	8.5	internal standard	NA	15S-15-methyl PGE2 [iSTD]	1.41217e+07	1.35609e+07	1.39862e+07	1.37931e+07	1.44276e+07	1.39815e+07	1.38817e+07	1.4183e+07
C18-neg	TF03	365.233	8.63	internal standard	NA	15S-15-methyl PGE1 [iSTD]	1.60447e+07	1.55451e+07	1.61044e+07	1.56317e+07	1.60364e+07	15888507	1.56986e+07	1.60268e+07
C18-neg	QI04564	171.139	11.0668	HMDB0000511	1	Capric acid	2546.64	2388.77	2661.6	2475.34	2590.13	2556.37	2383.06	2280.84
C18-neg	QI05483	199.171	12.7142	HMDB0000638	1	Lauric acid	17929.4	19519.5	18536.4	17660.1	17518.3	18293.3	19044.5	17966
C18-neg	QI05947	213.186	13.4764	HMDB0000910	1	Tridecylic acid	2462.98	3411.96	2537.41	2308.77	2899.38	2974.15	2790.64	2375.14
C18-neg	QI06315	227.202	14.1754	HMDB0000806	1	Myristic acid	143910	157260	147845	135266	131090	137410	144722	155045
C18-neg	QI06765	241.217	14.8188	HMDB0000826	1	Pentadecylic acid	44142.9	104520	65585.4	51170	52144	54168.1	54045.8	60448.4
C18-neg	QI07005	255.233	15.4248	HMDB0000220	1	Palmitic acid	1.75128e+06	1.75963e+06	1.90565e+06	1.74845e+06	1.78622e+06	1.77813e+06	1.93273e+06	1.79709e+06
C18-neg	QI07197	269.249	15.9838	HMDB0002259	1	Margaric acid	13161.7	19642.6	18591.7	13426.7	13023.3	14332.8	17307.2	17099.7
C18-neg	TF04	283.264	16.53	HMDB0000827	1	Stearic acid	1.35335e+08	1.3495e+08	1.40212e+08	1.19654e+08	1.26139e+08	1.40431e+08	1.41184e+08	1.44707e+08
C18-neg	QI07681	297.28	17.1256	HMDB0000772	1	Nonadecylic acid	15113	20103.7	20969.9	13586.8	18062.9	19374.5	22577.7	18871.9
C18-neg	QI07909	311.296	17.788	HMDB0002212	1	Arachidic acid	133396	144743	183320	146554	144785	123423	154244	159196
C18-neg	TF05	225.185	13.16	HMDB0002000	1	Myristoleic acid	109663	146737	146177	154434	146446	121273	148183	105997
C18-neg	QI06195	239.202	13.9543	NA	NA	14-Pentadecenoic acid	4502.36	23075	3585.05	3249.88	4161.3	3239.48	2937.56	3319.27
C18-neg	TF06	239.202	13.82	NA	NA	10-Pentadecenoic acid	92632.5	188550	75741.8	79380	66713.8	63128.9	84165	60138.9
C18-neg	QI06493	253.217	14.466	HMDB0003229	1	Palmitoleic acid	149283	190022	221340	154330	163464	181453	233810	209396
C18-neg	QI06870	267.233	15.0633	HMDB0060038	1	10Z-Heptadecenoic acid	13176	51564.1	31123.5	23412.5	20461.7	26746.6	34450.7	31808.7
C18-neg	QI06260	277.217	14.0582	HMDB0001388	1	alpha-Linolenic acid	4257.89	5133.33	5289.35	5902.08	4614.7	5336.41	7253.26	6115.6
C18-neg	QI06304	277.217	14.1531	HMDB0003073	1	gamma-Linolenic acid	8903.06	14682	14883.5	10290.5	9136.3	16104.7	16189.4	15409.8
C18-neg	QI06748	279.233	14.7965	HMDB0000673	1	Linoleic acid	356190	633235	707032	529409	374634	665565	696265	642939
C18-neg	QI07070	281.249	15.6154	HMDB0000207	1	Oleic acid	797715	814420	1.00443e+06	723001	739209	801198	950820	965855
C18-neg	QI07253	295.264	16.122	HMDB0013622	1	Nonadeca-10Z-enoic acid	2735.07	3870.24	4322.42	3716.86	3735.28	3726.78	3455.71	4023.34
C18-neg	QI06196	301.217	13.9498	HMDB0001999	1	Eicosapentaenoic acid	126985	180771	239691	125300	166871	220775	303683	157196
C18-neg	QI06604	303.233	14.6424	HMDB0001043	1	Arachidonic acid	9.45688e+06	11737172	1.32093e+07	1.12094e+07	1.07602e+07	1.28503e+07	1.38035e+07	1.18003e+07
C18-neg	QI06938	305.249	15.2396	HMDB0002925	1	Eicosatrienoic acid	735.905	11322.8	11350	5795.11	5129.97	13759.6	13190.5	9606.27
C18-neg	QI07490	309.28	16.6371	HMDB0002231	1	Eicosenoic acid	189036	261023	344220	234626	219768	268177	317762	342064
C18-neg	QI06461	327.233	14.4526	HMDB0002183	1	Docosahexaenoic acid	4.61572e+06	6.38153e+06	7.97166e+06	5.14067e+06	4.22797e+06	6.37613e+06	7.78032e+06	6.45708e+06
C18-neg	QI06772	329.249	14.8277	HMDB0001976	1	Docosapentaenoic acid (22n-6)	70792.8	118481	166057	96746.1	81895	123890	178108	138602
C18-neg	QI07027	331.264	15.4705	HMDB0002226	1	Adrenic acid	88309.1	111565	169563	102626	99513.4	117715	167401	148034
C18-neg	QI07920	337.311	17.8371	HMDB0002068	1	cis-Erucic acid	113030	92872.1	126295	151706	129913	88827	154160	171055
C18-neg	QI08361	365.343	19.4473	HMDB0002368	1	Nervonic acid	16831.9	21464.1	33360.1	20377.2	22080.2	25271.3	46202.6	35724.4
C18-neg	QI05812	213.186	13.2624	HMDB0304761	NA	11-Methyllauric acid	1355.12	2056.8	1090.83	1244.03	1219.95	1687.28	1147.67	1198.35
C18-neg	TF07	297.28	16.98	HMDB0061710	1	Xi-17-Methyloctadecanoic acid	135367	225983	186442	113879	113994	131285	187388	110057
C18-neg	QI04003	159.066	1.74747	HMDB0000555	1	3-Methyladipic acid	2225.2	4997.3	3429.44	3489.55	2610.71	2918.43	4521.43	3295.14
C18-neg	TF08	187.098	5.31	HMDB0000784	1	Azelaic acid	1.83273e+06	4.46602e+06	2.36258e+06	2.88e+06	2.3413e+06	2.01933e+06	2.62784e+06	2.26768e+06
C18-neg	QI09656	201.114	6.50468	HMDB0000792	1	Sebacic acid	19429.8	42054.4	26043.9	27433.9	20233	25956.1	41326.4	28421.8
C18-neg	QI09860	215.129	7.4262	HMDB0000888	1	Undecanedioic acid	30893.1	34842	31030.7	31899.6	31212.6	32416.9	33797.9	33177.3
C18-neg	QI10028	229.145	8.20172	HMDB0000623	1	Dodecanedioic acid	41686.3	43668	39798.8	42234.3	42159.4	41158.4	44396.1	42521.3
C18-neg	QI10535	257.176	9.61743	HMDB0000872	1	Tetradecanedioic acid	22901.1	23758.8	22559	22841.7	23722.9	22198.7	23230.7	23176.1
C18-neg	QI04503	285.207	10.9954	HMDB0000672	1	Hexadecanedioic acid	21155.8	18612.2	19199.2	18075.6	21577.2	17620.3	18919.3	19874.5
C18-neg	QI06025	341.27	13.6279	HMDB0242141	1	Eicosanedioic acid	7971.85	5657.79	6504.95	5372.29	6180.04	7358.21	6986.15	6233.49
C18-neg	QI09603	159.103	6.28628	HMDB0001954	1	3-Hydroxyoctanoic acid	837.489	1149.9	1212.82	1415.67	934.401	1172.44	1346.58	1413.91
C18-neg	QI10155	187.134	8.57612	HMDB0002203	1	3-Hydroxydecanoic acid	1417.84	1264.72	1350.88	1012.61	1435.82	1327	1276.22	1814.67
C18-neg	QI05401	243.197	12.5627	HMDB0002261	1	2-Hydroxymyristic acid	10262.8	10004.4	10631.5	9391.87	10928.2	9636.01	9712.75	9019.02
C18-neg	QI04837	271.228	11.5005	HMDB0006294	1	Juniperic acid	55801.3	49468.1	49799.3	49796	57158.6	49646.5	49664.5	52610.2
C18-neg	QI06269	271.228	14.0805	HMDB0031057	1	2-Hydroxy palmitic acid	37394	45164.6	39645.4	44120.2	43846.2	44491.2	51910.3	47063.3
C18-neg	TF09	297.244	14.38	NA	NA	2-Hydroxyoleic acid	1.48267e+06	1.55828e+06	1.42301e+06	1.30541e+06	1.57104e+06	1.52541e+06	1.9425e+06	1.45702e+06
C18-neg	QI06426	297.244	14.3755	NA	NA	2-Hydroxyoleic acid	52878.5	53044.2	53117.4	51012.1	57606.2	53990	71633.7	57243.9
C18-neg	QI06692	297.244	14.7417	HMDB0010736	1	3-Oxooctadecanoic acid	13233.8	15152	16159.9	16457.6	14256	15199.5	17736.8	16643.8
C18-neg	QI04260	313.239	10.3522	HMDB0004705	1	12,13-DiHOME	14856	14115.9	10747.6	14130.4	15079.9	12837.8	12411.5	14276
C18-neg	QI04313	313.239	10.4681	HMDB0004704	1	9,10-DiHOME	10409	9431.27	9064.15	9929.5	11497.1	10148.6	8895.64	10906.1
C18-neg	QI05051	295.228	11.8674	HMDB0004667	1	13-HODE	31921.7	33639.1	32412.1	32228.5	31815.1	30207.1	33200.8	34146.6
C18-neg	QI05360	319.228	12.4825	HMDB0011134	1	5-HETE	4103.83	4162.95	3883.59	4123.01	5832.56	5246.4	3404.14	3883.08
C18-neg	QI05214	319.228	12.1838	HMDB0004682	1	11-HETE	11738.8	16124.5	17334	13149.6	17280.7	20675.2	18504.5	15006
C18-neg	QI05287	319.228	12.3309	HMDB0006111	2	12-HETE	18206.4	17810.4	20702.6	11343.2	17017.3	15524.9	21760.9	19407.6
C18-neg	QI05147	319.228	12.0501	HMDB0003876	1	15-HETE	14073.7	16774.6	17972.6	14653.7	19035.2	20360.7	18387.3	17264.3
C18-neg	TF10	319.227	12.42	HMDB0010222	1	9-HETE	86664.8	84211.8	97249.3	69953.3	115556	129534	98397.6	73087.8
C18-neg	TF11	337.238	10.71	NA	NA	LTB3	93864.8	66782.4	38407.6	86826.3	125562	81569.1	58742.3	87886.7
C18-neg	TF12	351.217	8.28	HMDB0005082	1	Lipoxin B4	52895.4	52657	45045.2	35393.9	47767.1	44596.6	62372.1	37792
C18-neg	QI10076	351.218	8.36663	HMDB0001403	1	PGD2	19549	23989.9	28464.4	23384.2	32428.1	31059.4	32126.8	25161.9
C18-neg	QI10010	351.218	8.13932	HMDB0001220	1	PGE2	3831.9	5057.06	3977.63	4199.14	5958.4	5999.06	5531.14	4419.77
C18-neg	QI09977	353.234	7.93875	HMDB0001139	1	PGF2alpha	28510.7	32813.9	41586.7	34492.5	35542.9	33762.5	37488.3	38670.1
C18-neg	TF13	353.233	7.55	HMDB0001483	1	PGF2beta	28513	42450.4	45842	32113.3	37935.9	34778.3	39757.1	41327.5
C18-neg	QI09894	369.229	7.58218	HMDB0003252	1	TXB2	10159.2	11460.4	11761	11474.1	15498	14367.5	13918.7	13315.5
C18-neg	TF14	343.228	12.22	HMDB0060037	2	10-HDoHE	68212	90007.1	93299.6	45309.2	54752.4	76936.4	99079.1	89486.9
C18-neg	TF15	343.228	12.13	HMDB0060043	1	13-HDoHE	62070.8	111080	138934	89141.1	93925.6	131158	142198	106243
C18-neg	TF16	343.228	12.06	HMDB0010213	2	17-HDoHE	13430.3	28532.4	31086.8	8527.69	12996.7	30191.6	19086.9	21101.7
C18-neg	QI05078	343.228	11.9298	HMDB0060048	1	20-HDoHE	1182.07	1549.48	982.578	1092.92	953.932	993.886	1991.82	2093.89
C18-neg	TF17	343.228	12.42	HMDB0060050	1	7-HDoHE	27360.3	41452.3	16024.5	21193.2	31118.9	33872.9	39504.4	37673.7
C18-neg	QI06114	344.281	13.7867	HMDB0002100	1	Palmitoyl-EA	7885.46	16142	14560	13169.5	13827.5	15293.6	20790.5	16755.1
C18-neg	QI10543	416.302	9.6308	HMDB0005066	1	CAR 14:0	1937.78	3787.85	3487.38	3846.88	3942.38	3924.2	5308.96	5391.71
C18-neg	TF18	311.296	16.92	HMDB0000801	1	Phytanic acid	45798.3	74280.8	55823.4	37388.7	75188.9	36258.6	80883.3	34737.6
C18-neg	QI05825	299.202	13.2713	HMDB0002369	1	9-cis-Retinoic acid	67270.5	64582.9	64585.7	76328	71003.5	65308.6	70083.6	72050.1
C18-neg	QI04215	378.242	10.2336	HMDB0000277	1	Sphingosine 1-phosphate	46705.7	104543	89400.8	86334.7	102651	130297	132094	101620
C18-neg	TF19	391.285	11.08	HMDB0000626	1	Deoxycholic acid	73127.4	72165.3	62077.2	52292.1	95934	84311.3	73054	75495.6
C18-neg	QI09118	137.025	4.44307	HMDB0001895	1	Salicylic acid	1028.12	1243.55	981.526	1135.41	1106.46	1203.83	1244.35	1228.45
C18-neg	TF20	321.207	10.86	HMDB0033615	1	Gingerol	66898.7	70206.3	38138.5	59304	82932.9	52856.9	45320.4	75315.7
C18-neg	QI01507	179.056	0.729733	HMDB0000122	2	Hexose	95626.5	114536	115943	107635	106529	117631	121605	114523
C18-neg	QI03832	176.039	1.3483	HMDB0001015	1	N-Formylmethionine	625.88	986.417	1108	670.189	712.687	703.563	1216.76	996.179
C18-neg	TF21	222.077	1.32	HMDB0000866	1	N-Acetyltyrosine	10015.6	35943.9	16163.1	17068.7	18890.2	37835	30725.1	22090.9
C18-neg	TF22	225.088	1.05	HMDB0000245	1	Porphobilinogen	13716.8	35055.2	25614.5	31599.7	6844.47	15985.9	23595.8	17628
C18-neg	TF23	165.056	3.25	HMDB0000779	1	Phenyllactic acid	78131	114317	94890.7	83649.5	92982.6	110362	89194.2	93208.5
C18-neg	QI02025	151.026	0.8055	HMDB0000786	1	Oxypurinol	238635	93012.3	189992	210094	216213	171011	148144	187327
C18-neg	QI05158	526.352	12.0635	HMDB0062195	NA	LPC O-16:0	7530.38	19241.4	17522.7	15873	18619.1	21224.3	31442.4	18512.1
