# Supplementary material for: Acsl4-mediated Lipid Homeostasis Orchestrates Synaptic and Cognitive Plasticity
Source: Research Square preprint supplement (doi:10.21203/rs.3.rs-7437638/v1), 2026-04-28
Supplement: Supplementary file 1 [file a132ec5014510d37e2599167.docx]

**SUPPLEMENTAL INFORMATION**

**Acsl4-mediated Lipid Homeostasis Orchestrates Synaptic and Cognitive Plasticity**

H.-S. Li, B. Liu, Q.-P. Zhang, Y. Jin, D.M.D. Chambers, L.A. Colgan, H. Kang, J. Passarelli, G. Mzaouakk, S. Sun, Y. Yang, C.B. Clish, A.S. Greenberg, R. Yasuda, D. Kong

Extended Data Figures 1-14.


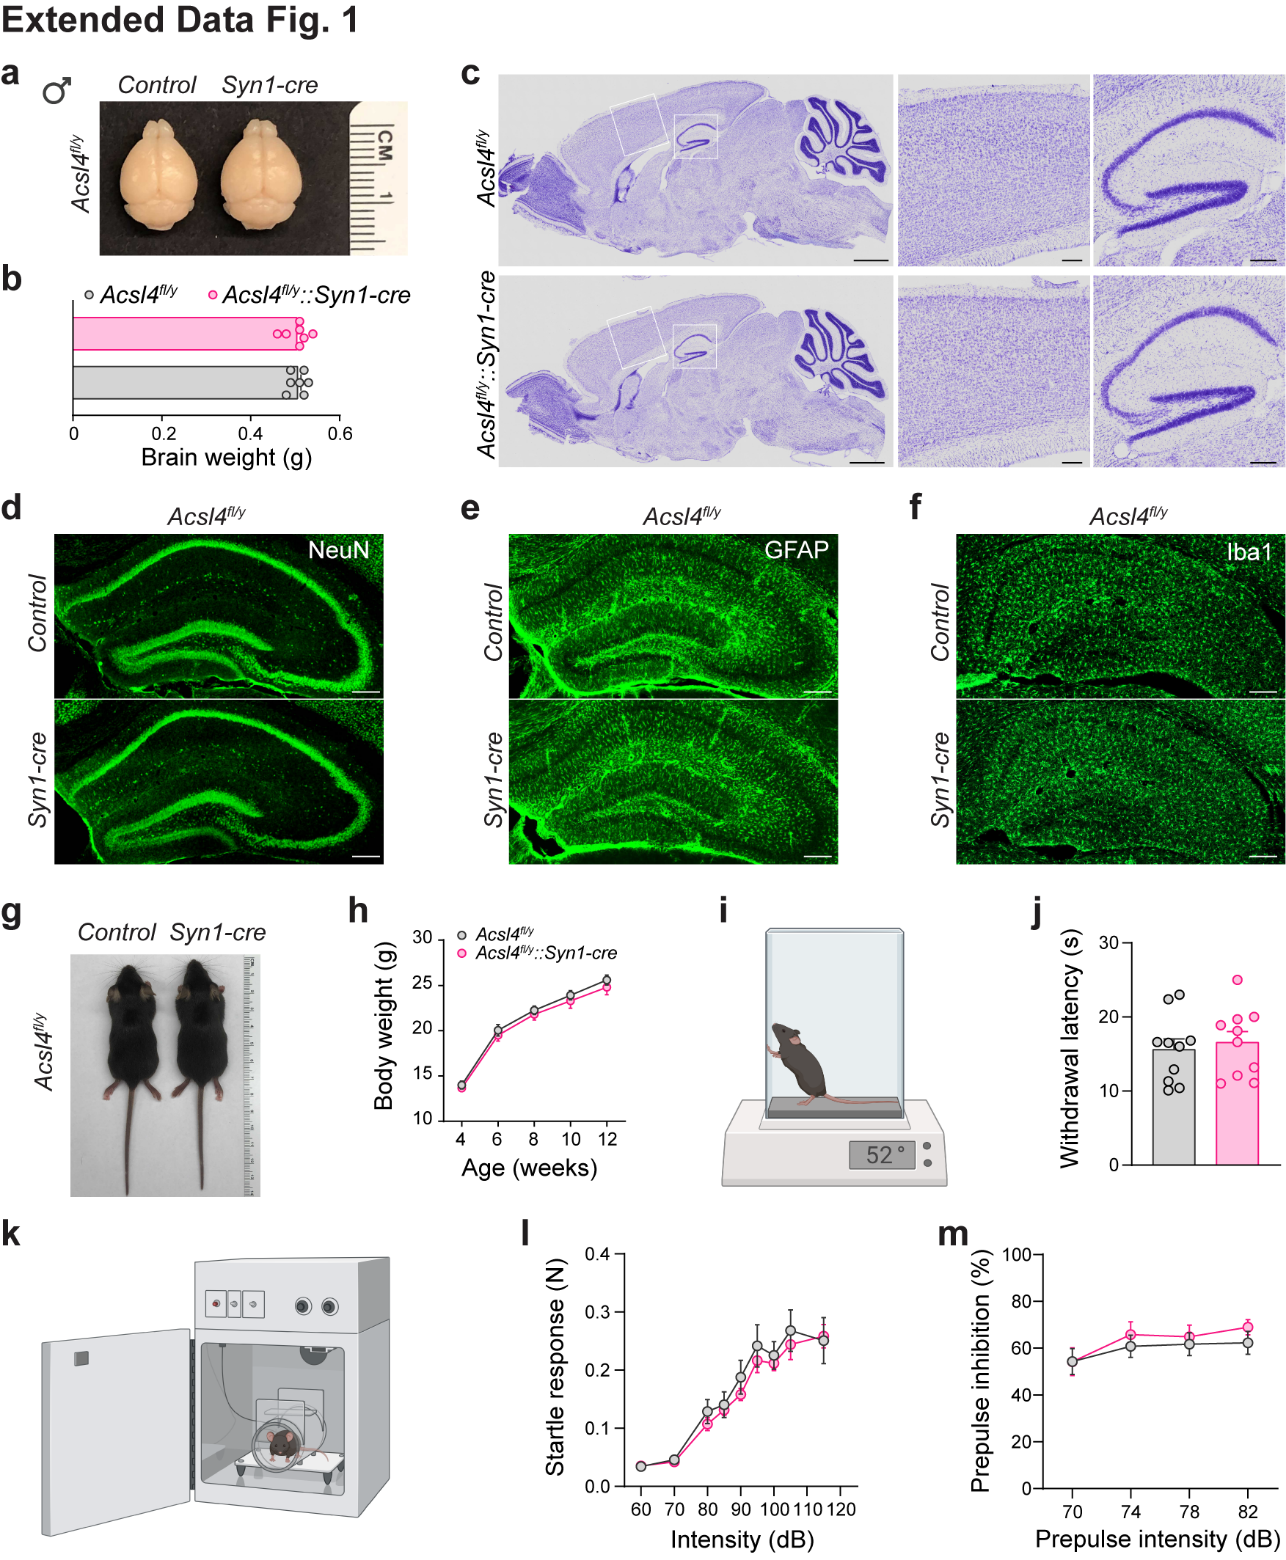


**Extended Data Fig 1. | See next page for caption.**

**Extended Data Fig 1. | Additional characterizations in neuron-specific *Acsl4*-deficient mice. a**-**c**, Dissected whole brain (**a**), brain weight (**b**), and Nissl staining (**c**) results from P56 littermates. Scale bar: 1 mm (left), 200 μm (middle), 200 μm (right). **d**-**f**, Immunostaining showing morphology and density of neurons (**d**), astrocytes (**e**), and microglia (**f**) in the P28 hippocampus. Experiments were repeated with 3 mice per group. Scale bar: 200 μm. **g**, **h**, Representative images (**g**) and body weight growth curves (**h**). n = 10 mice per group. **i**, **j**, Schematic of the hot plate test (**i**) and the withdrawal latency (**j**). n = 10 mice per group. **k**-**m**, Schematic of the startle response test (**k**). Startle responses to different startle stimuli (**l**). Prepulse inhibition (%) by different prepulse intensities (**m**). n = 10 to 11 mice per group. Cartoons were made using BioRender. Two-tailed unpaired t-test (**b**, **j**), two-way ANOVA test (**h**, **l**, **m**). Data are presented as mean ± SEM. See Source Data for detailed statistics.


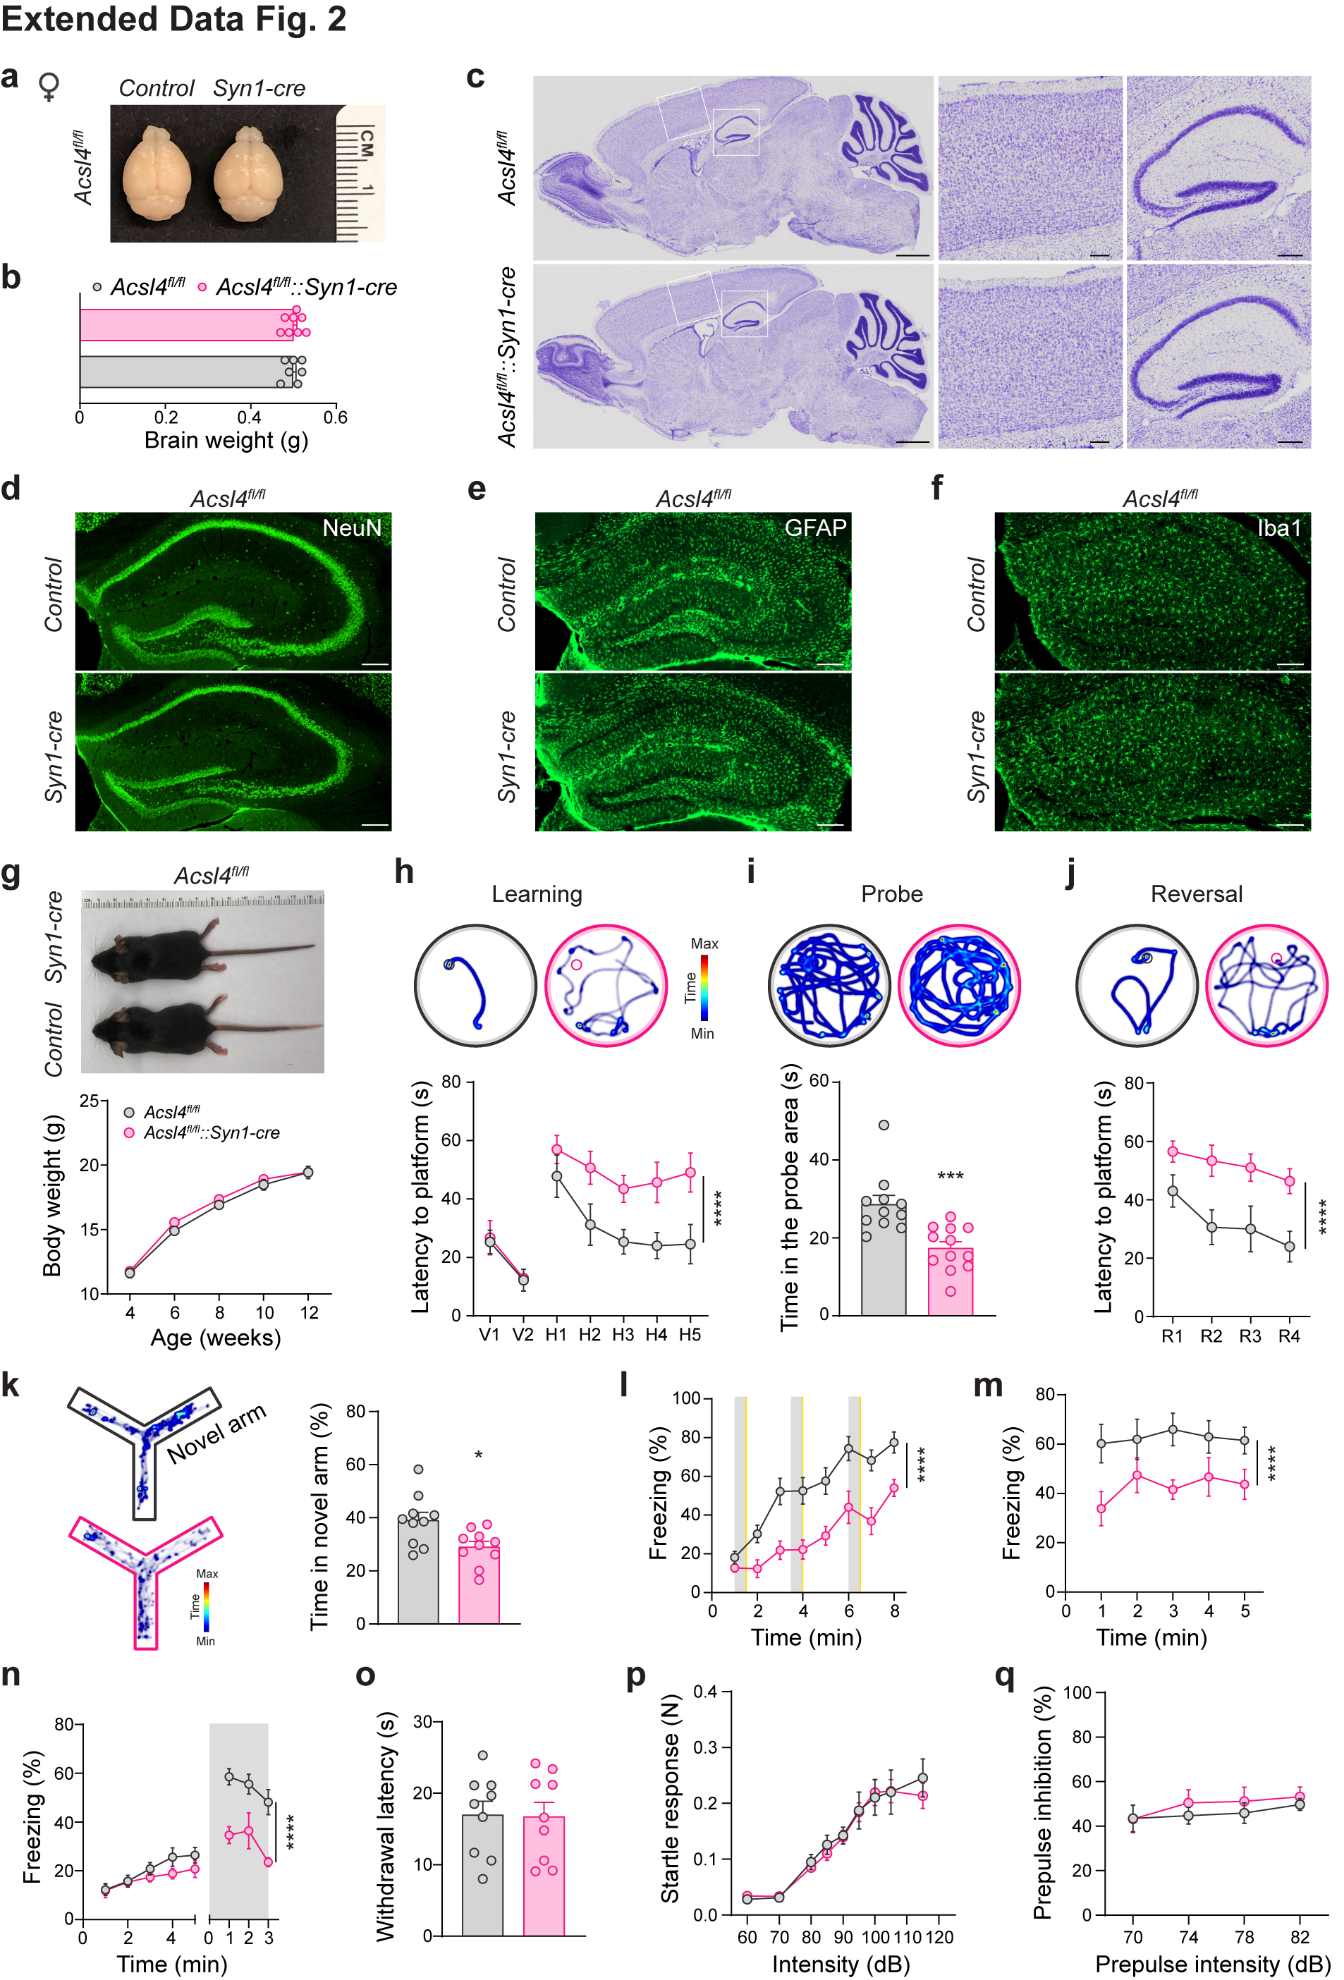


**Extended Data Fig 2. | See next page for caption.**

**Extended Data Fig 2. | Characterizations of neuron-specific *Acsl4*-deficient female mice**. **a**-**c**, Dissected whole brain (**a**), brain weight (**b**), and Nissl staining (**c**) results from P56 littermates. Scale bar: 1 mm (left), 200 μm (middle), 200 μm (right). **d**-**f**, Immunostaining showing morphology and density of neurons (**d**), astrocytes (**e**), and microglia (**f**) in the P28 hippocampus. Experiments were repeated with 3 mice per group. Scale bar: 200 μm. **g**, Representative images and body weight growth curves. n = 10 mice per group. **h**-**n**, Morris water maze tests (**h**-**j**), Y-maze tests (**k**), and fear conditioning tests (**l**-**n**). n = 9 to 12 mice per group. **o**-**q**, Hot plate test (**o**), startle responses to different startle stimuli (**p**), and prepulse inhibition (%) at different prepulse intensities (**q**). n=9 to 10 mice per group. **P* < 0.05, ****P* < 0.001, *****P* < 0.0001. Two-tailed unpaired t-test (**b**, **i**, **k**, **o**), two-way ANOVA test (**g**, **h**, **j**, **l**-**n**, **p**, **q**). Data are presented as mean ± SEM. See Source Data for detailed statistics.

**
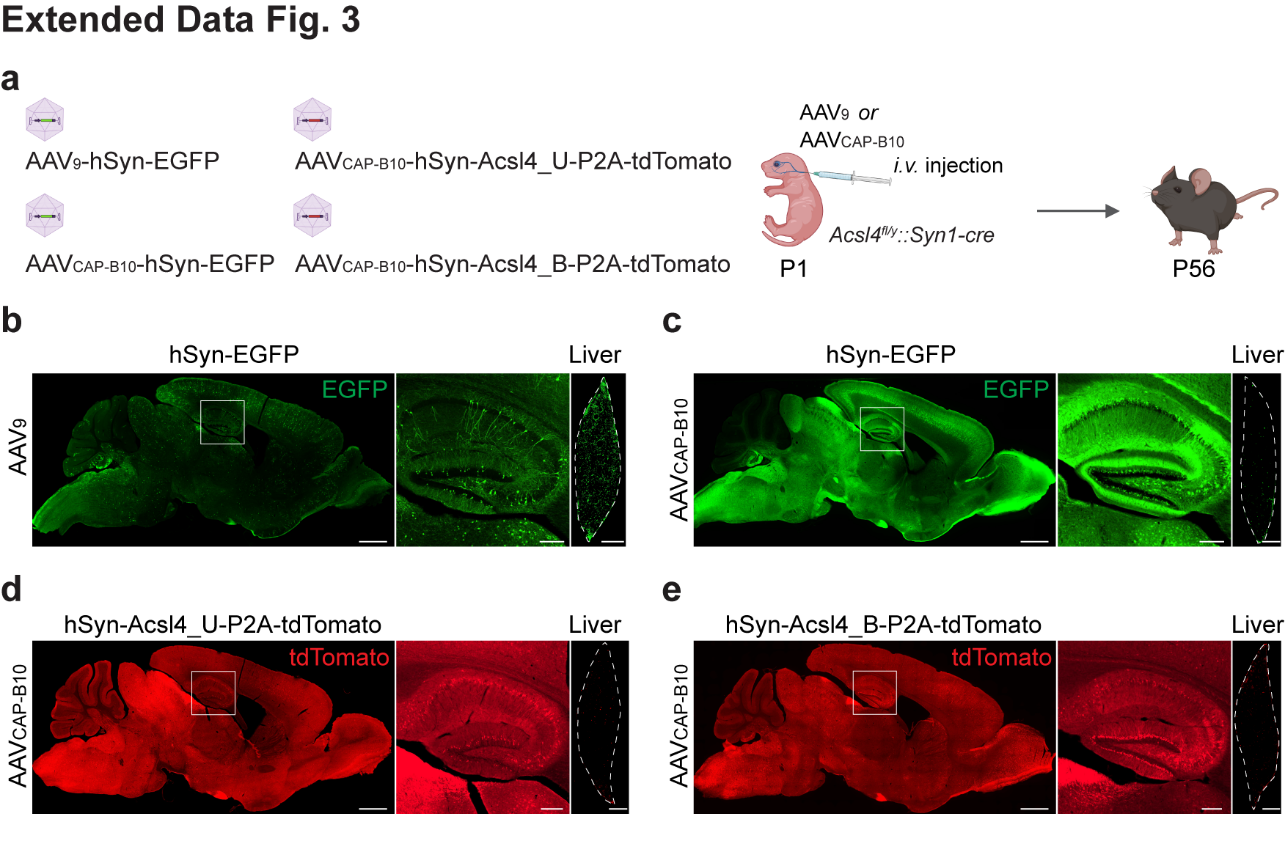
**

**Extended Data Fig 3. | Verification of AAVCAP-B10 viruses. a**, Experimental schematic showing intravenousinjection of AAV vectors into P1 *Acsl4fl/y::Syn1-cre* mice. **b**-**e**, Immunostaining against EGFP (green) or tdTomato (red) in AAV9 (**b**) or AAVCAP-B10-virus-transfected (**c**-**e**) brain and liver tissues. Scale bar for each panel: 1 mm (left), 200 μm (middle), 1 mm (right). Cartoons were made using BioRender.


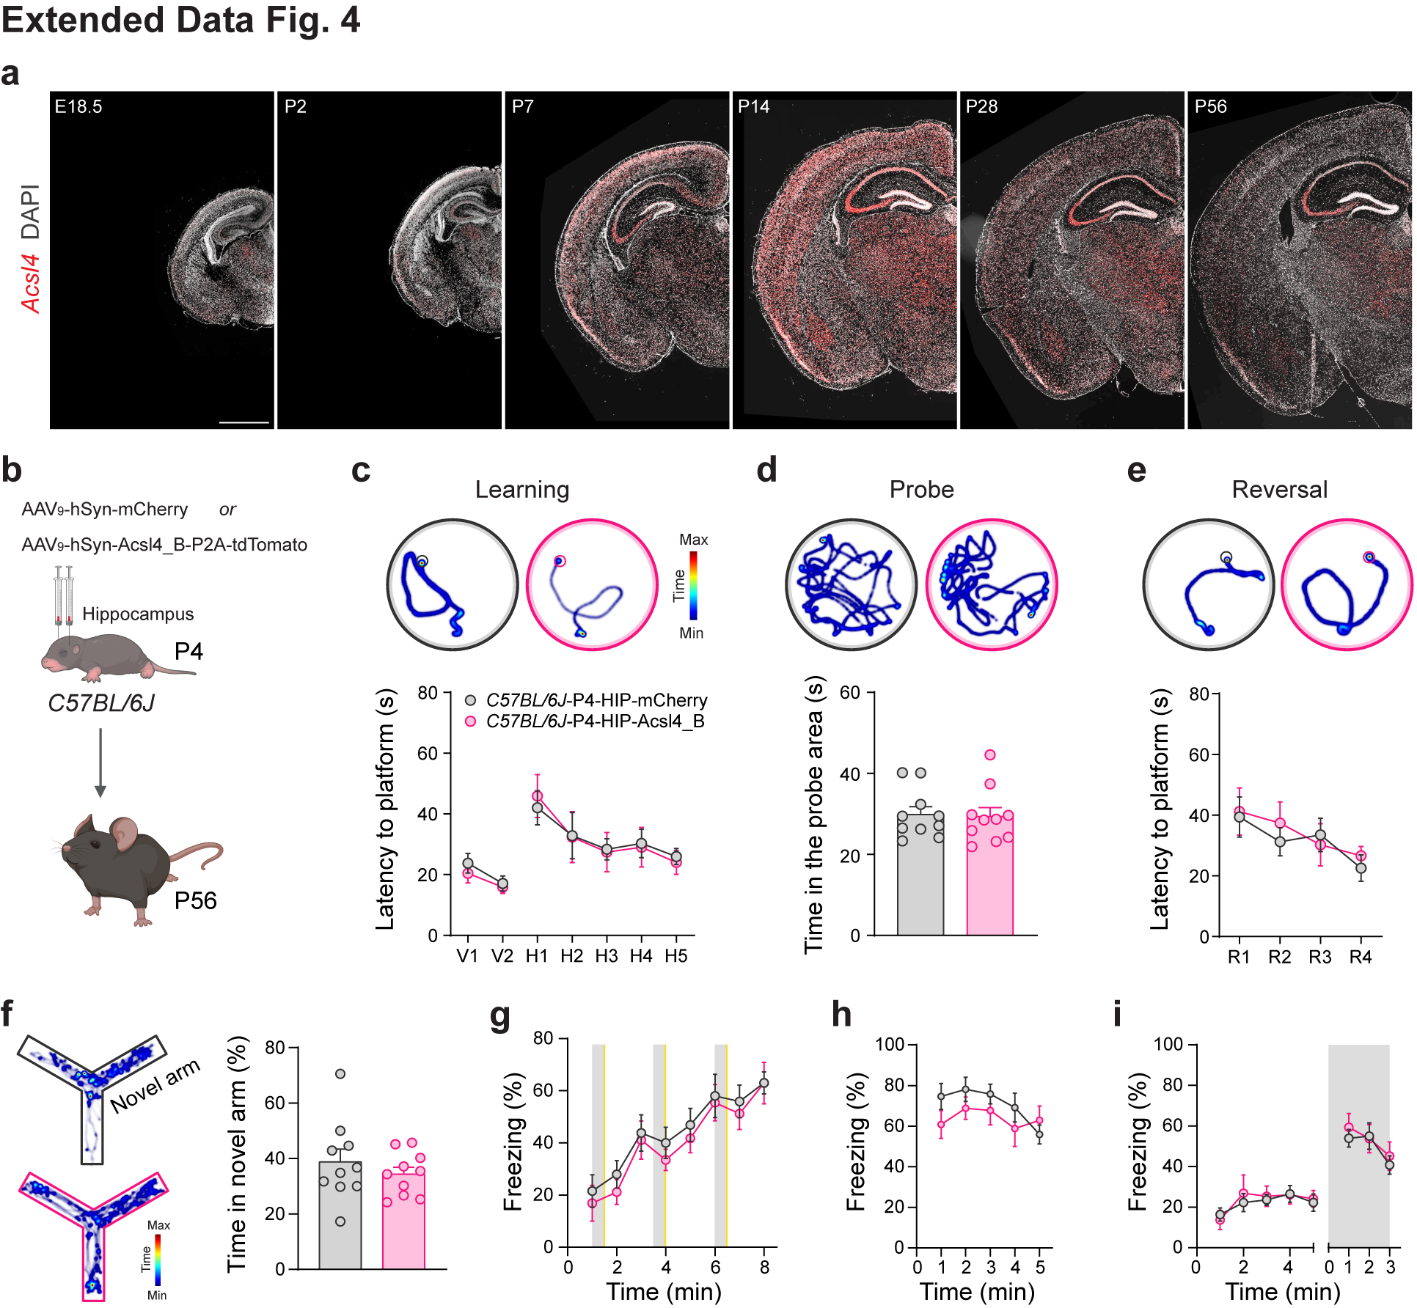


**Extended Data Fig 4. | *Acsl4* expression in the developing mouse brain and the effects of its hippocampal overexpression on cognition. a**, Representative ISH images of *Acsl4* mRNA expression in the brain at different developmental time points. Repeated in 3 mice per group. Scale bar: 1 mm. **b**-**i**, Experimental diagram (**b**), Morris water maze tests (**c**-**e**), Y-maze tests (**f**), and fear conditioning tests (**g**-**i**) in mice overexpressing Acsl4_B in the hippocampus, suggesting that overexpression of Acsl4_B in the hippocampus during early development does not affect cognition. n = 9-10 mice per group. Cartoons were made using BioRender. Two-tailed unpaired t-test (**d**, **f**), two-way ANOVA test (**c**, **e**, **g**-**i**). Data are presented as mean ± SEM. See Source Data for detailed statistics.


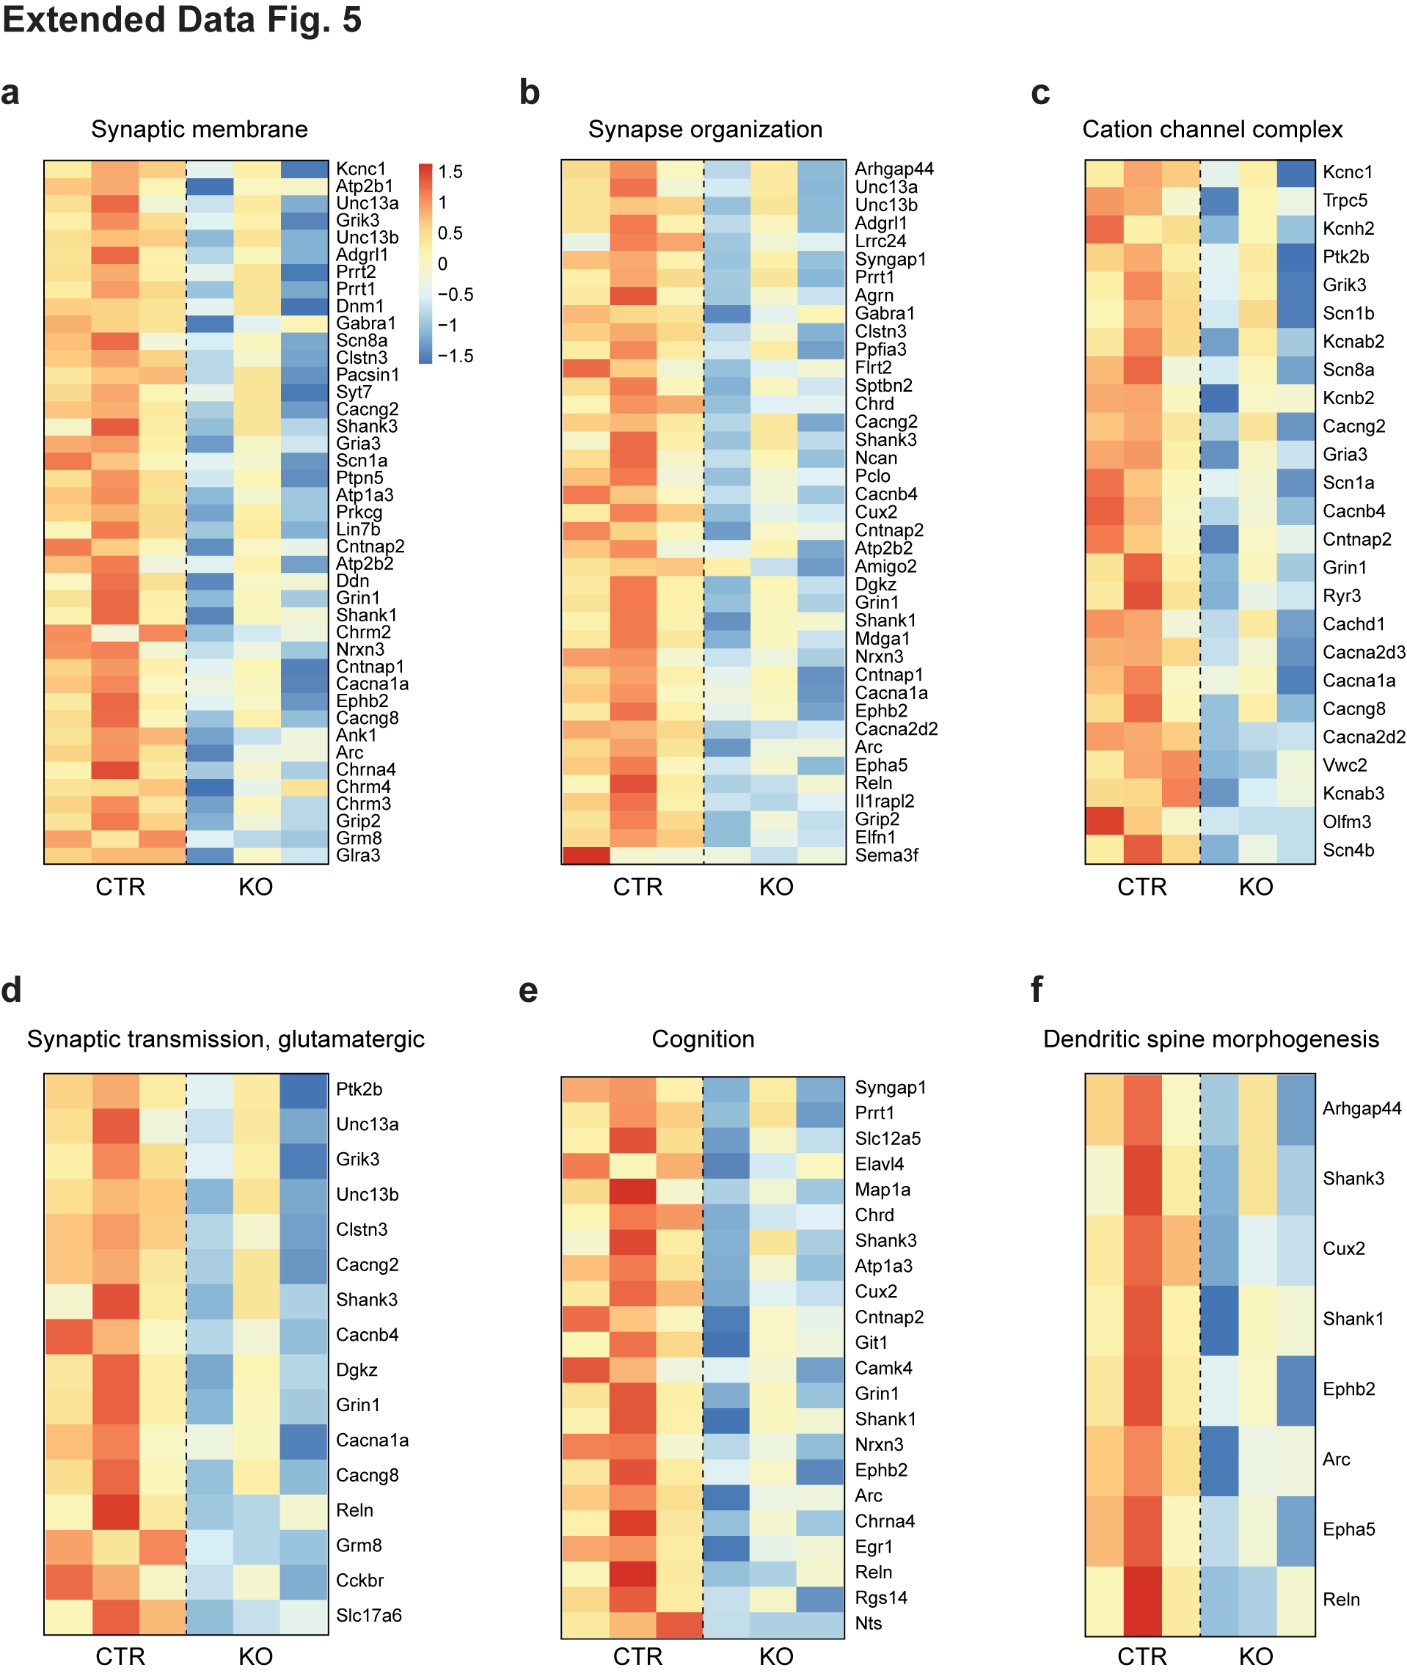


**Extended Data Fig 5. | Heatmaps showing downregulated genes in the hippocampus following *Acsl4* deletion. a**-**f**, Heatmaps showing downregulated genes associated with synaptic membrane integrity (**a**), synapse organization (**b**), cation channel complex (**c**), glutamatergic synaptic transmission (**d**), cognition (**e**), and dendritic spine morphogenesis (**f**). See Source Data for detailed statistics.


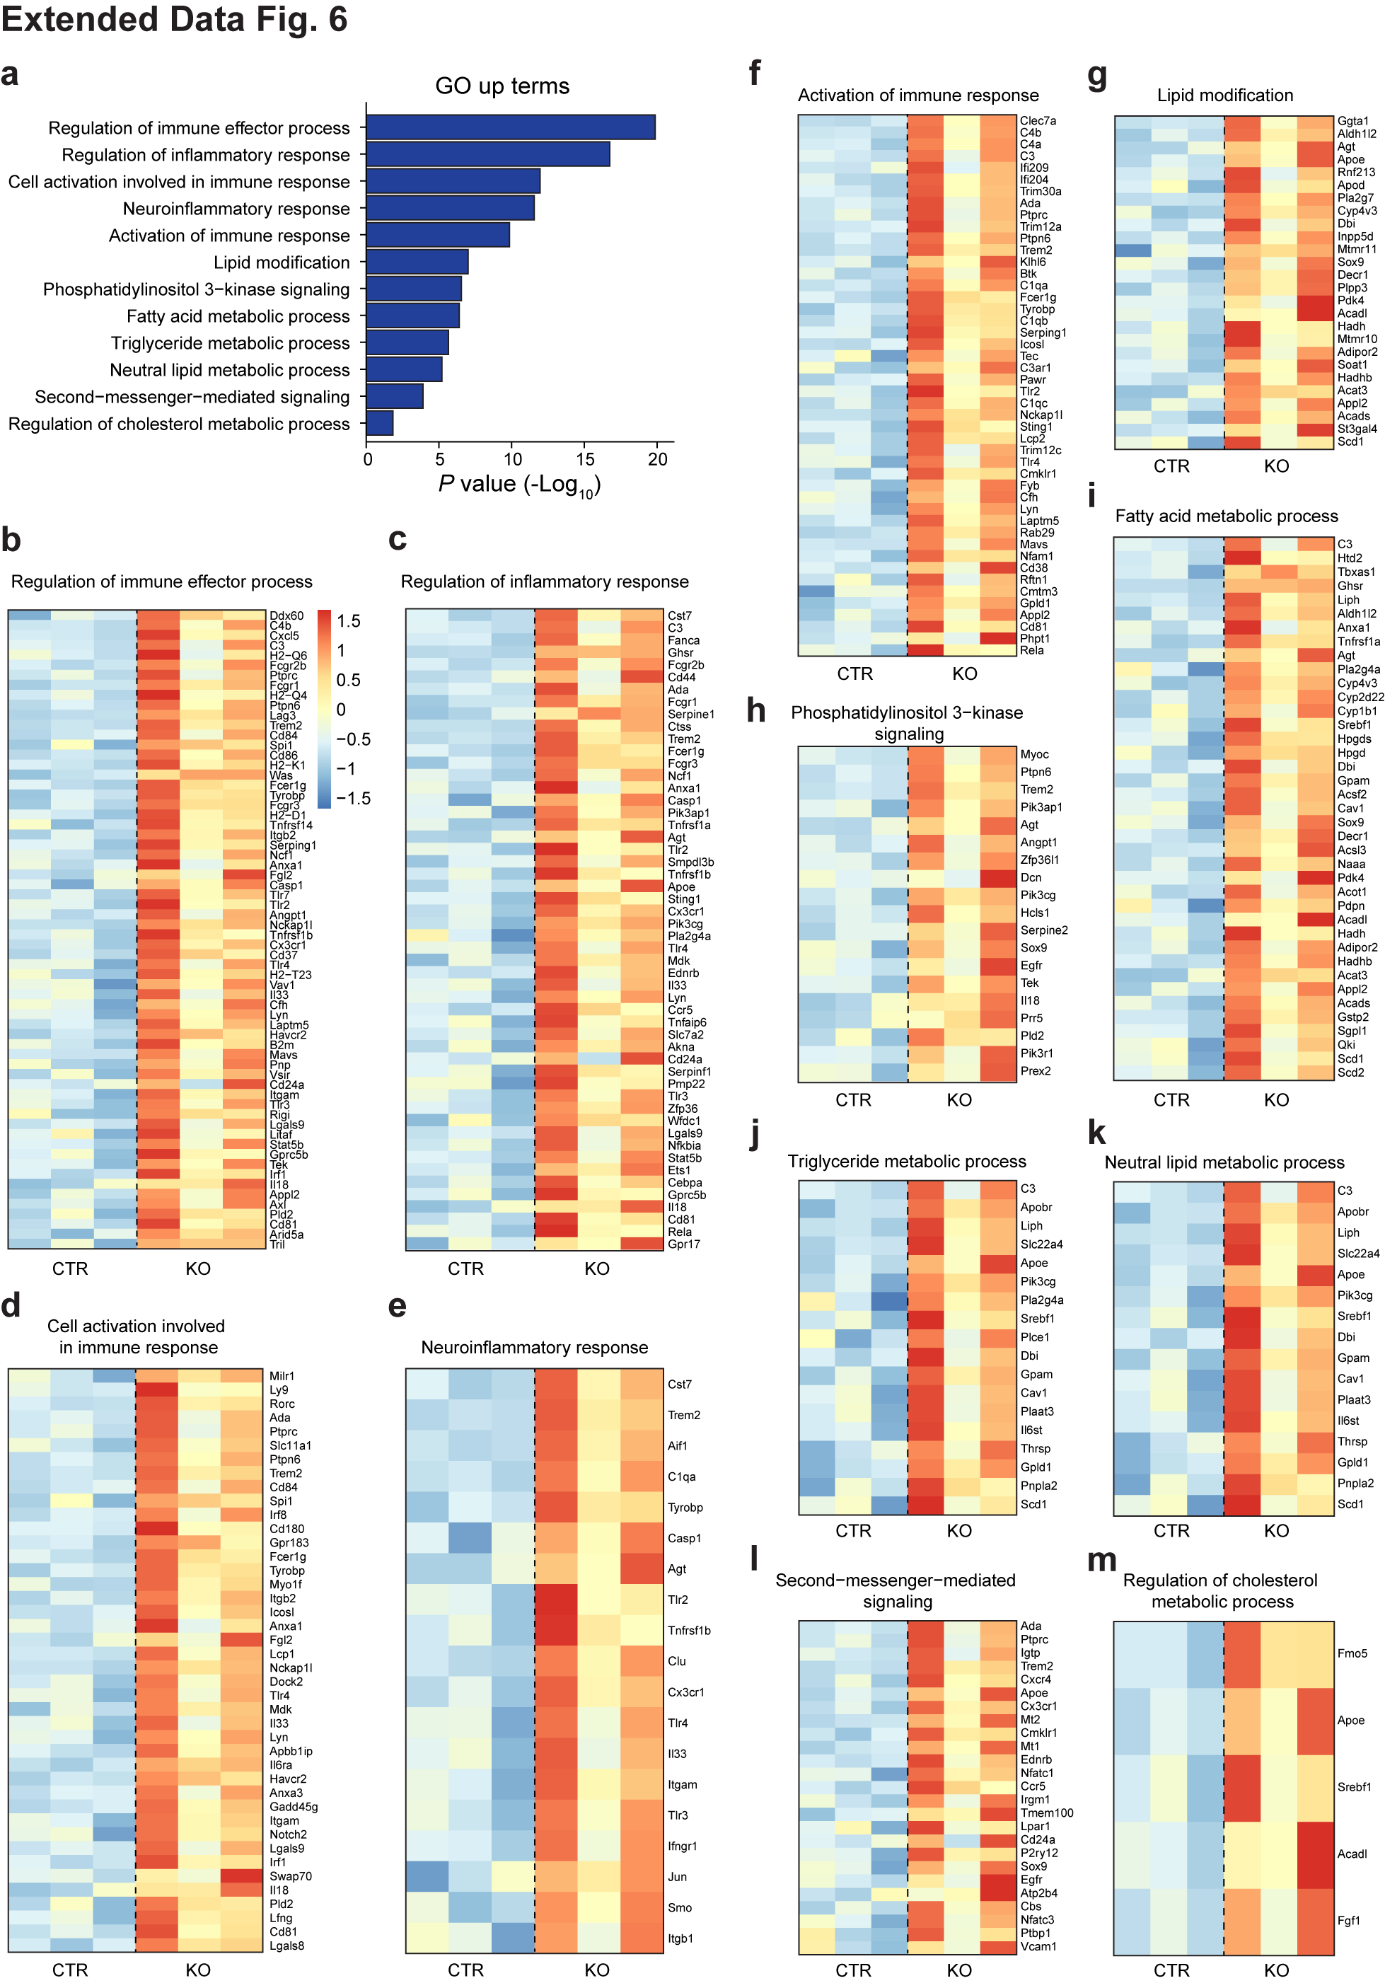


**Extended Data Fig 6. | See next page for caption.**

**Extended Data Fig 6. | Additional data of transcriptional analysis of the hippocampal genes following *Acsl4* deletion. a**, Gene ontology (GO) analysis showing significantly enriched GO terms in upregulated genes from KO compared to CTR. GO terms with *P* < 0.05 were considered significant. **b**-**m**, Heatmaps illustrating upregulated genes associated with immune effector process (**b**), inflammatory response (**c**), cell activation involved in immune response (**d**), neuroinflammatory response (**e**), activation of immune response (**f**), lipid modification (**g**), phosphatidylinositol 3−kinase signaling (**h**), fatty acid metabolic process (**i**), triglyceride metabolic process (**j**), neutral lipid metabolic process (**k**), second-messenger-mediated signaling (**l**), and cholesterol metabolic process (**m**). See Source Data for detailed statistics.


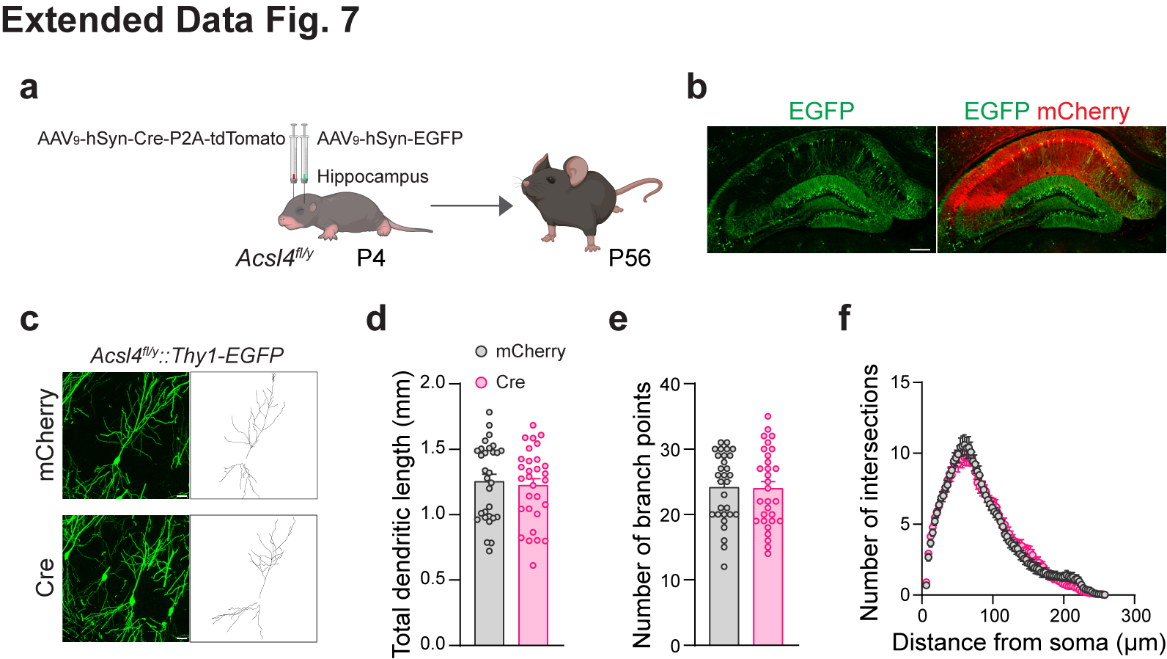


**Extended Data Fig 7. | Effects of *Acsl4* deletion on the morphology of CA1 neurons. a**, Schematic illustration of the experimental design for neuronal imaging. **b**, Dual immunofluorescent staining against EGFP (green) and mCherry (red). Scale bar: 200 μm.

**c**, Representative images and reconstructed traces of neurons. Scale bar: 20 μm. **d**, Quantification of total dendritic length. **e**, Number of dendritic branch points. **f**, Sholl analysis for the number of intersections. n = 30 cells from 3 mice per group. Cartoons were made using BioRender. Two-tailed unpaired t-test (**d**, **e**), two-way ANOVA test (**f**). Data are presented as mean ± SEM. See Source Data for detailed statistics.


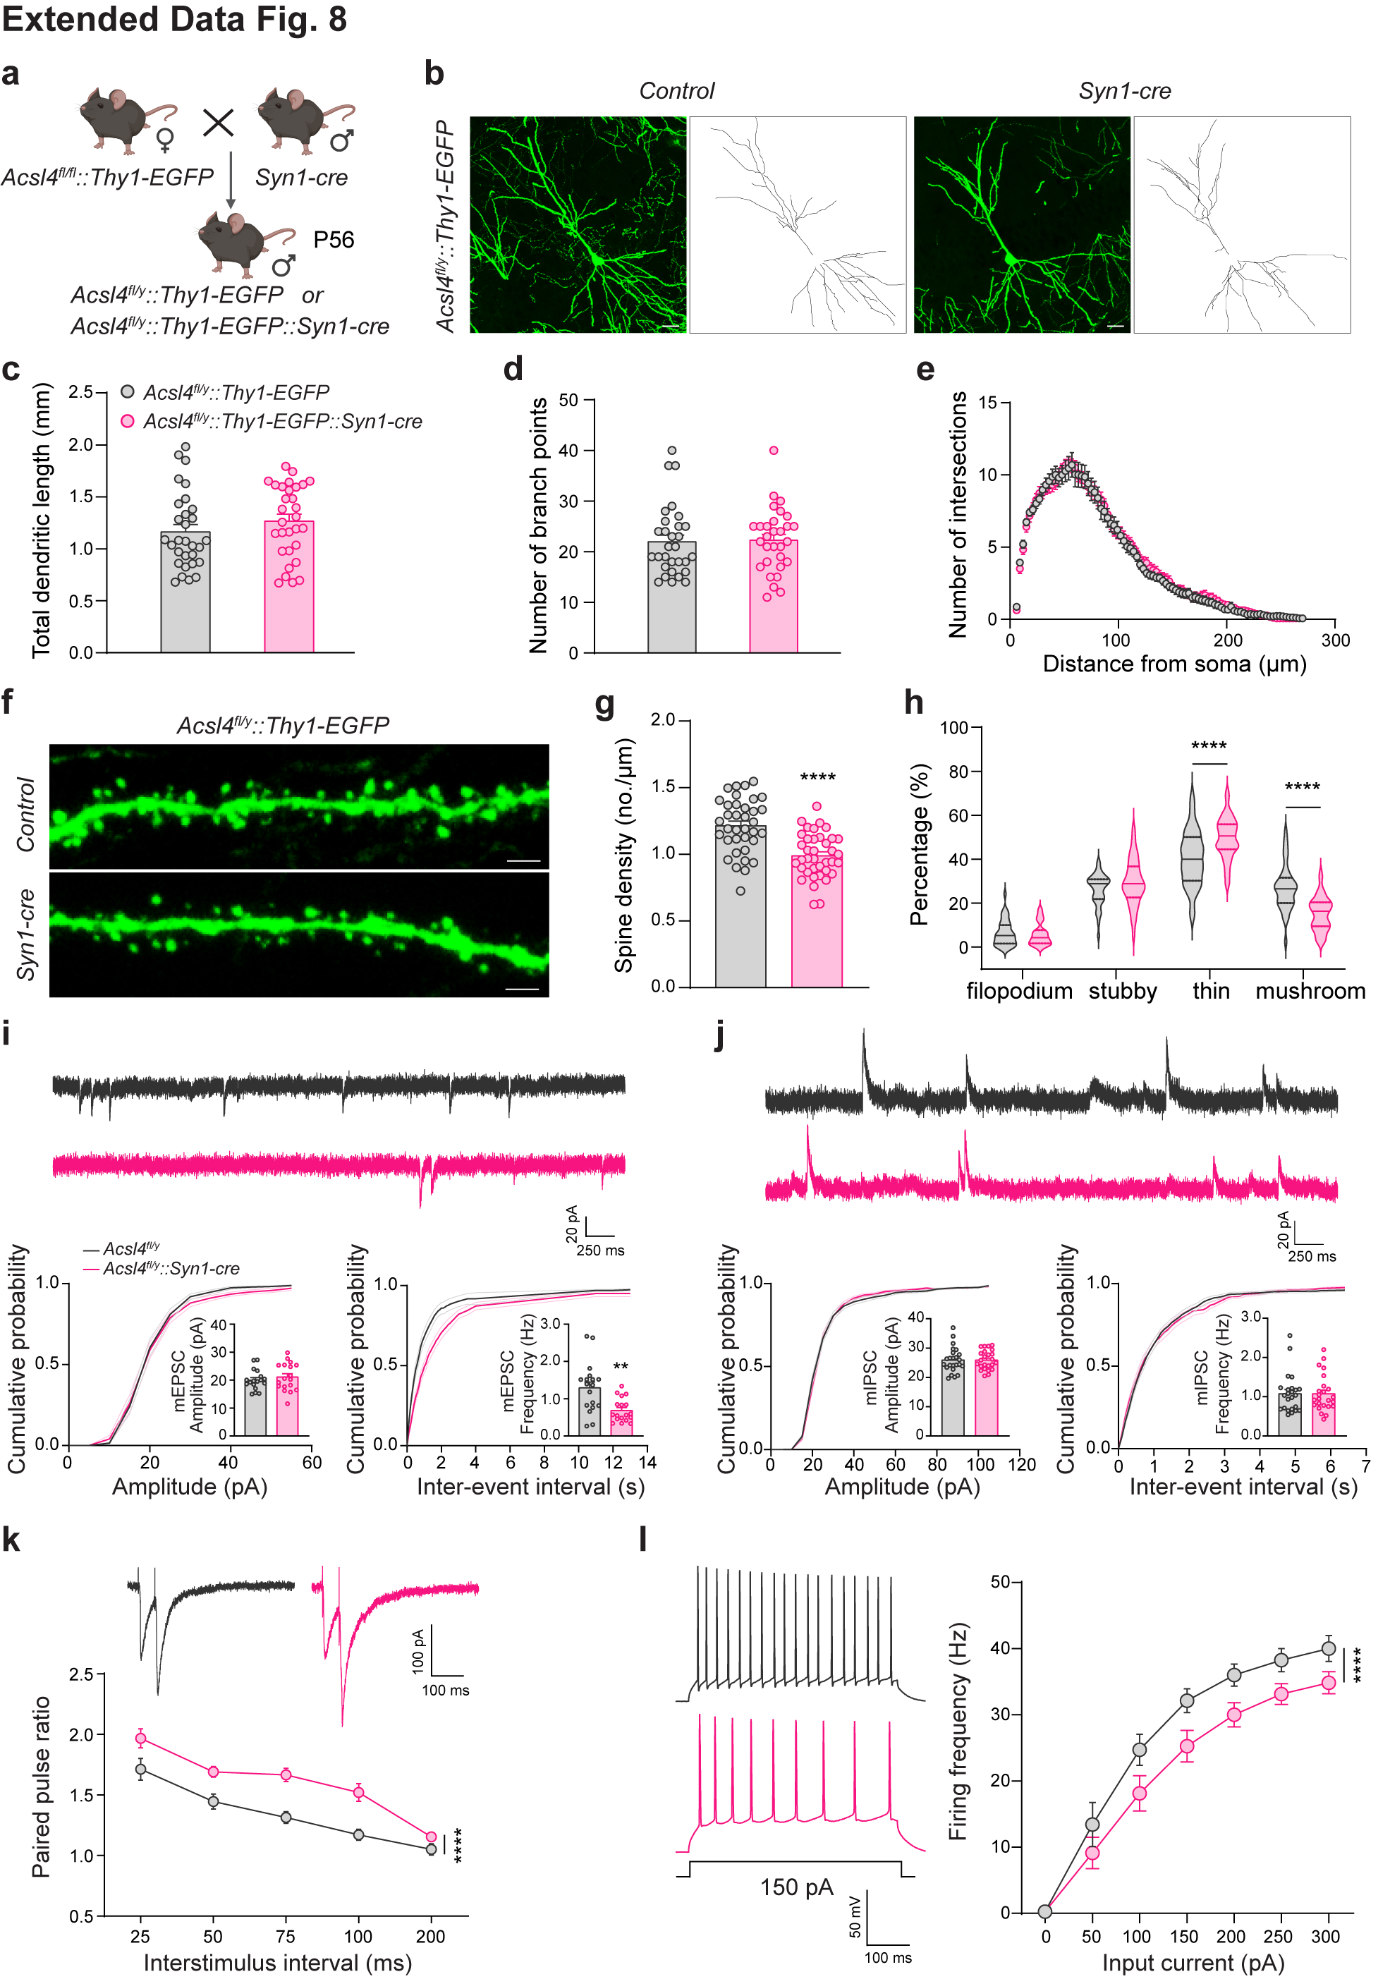


**Extended Data Fig 8. | See next page for caption.**

**Extended Data Fig 8. | Neuron-specific deletion of *Acsl4* impairs dendritic spine maturation, neuronal intrinsic excitability, and synaptic plasticity in the hippocampus. a**, Experimental diagram. **b**-**e**, Dendritic morphology of the CA1 neurons in *Acsl4fl/y::Thy1-EGFP::Syn1-cre* mice. Representative images and reconstructed traces of neurons (**b**). Scale bar: 20 μm. Quantification of total dendritic length (**c**), number of dendritic branch points (**d**) and Sholl analysis for the number of intersections (**e**). n = 30 cells from 3 mice per group. **f**-**h**, Characterization of dendritic spines of CA1 neurons in *Acsl4fl/y::Thy1-EGFP* (Control) and *Acsl4fl/y::Thy1-EGFP::Syn1-cre* KO mice. Representative images of dendritic spines (**f**). Scale bar: 2 μm. Quantification of spine density (**g**) and percentage of spine types (**h**). n = 36 to 38 cells from 3 mice per group. **i**, **j**, Representative traces and cumulative distribution plots of amplitudes and frequency of mEPSCs (**i**) and mIPSCs (**j**). Inset bar graphs show average for each. n = 18-24 cells from 4 mice per group. **k**, Representative traces and quantification of paired-pulse ratio recordings. n = 18 cells from 5 mice per group. **l**, Representative traces and intensity-dependent increase in firing frequency. n = 14 cells from 4 mice per group. Cartoons were made using BioRender. ***P* < 0.01, *****P* < 0.0001. Two-tailed unpaired t-test (**c**, **g**, **i**, **j**-amplitude), two-tailed Mann Whitney test (**d**, **j**-frequency), two-way ANOVA test (**e**, **h**, **k**, **l**). Data are presented as mean ± SEM. See Source Data for detailed statistics.

**
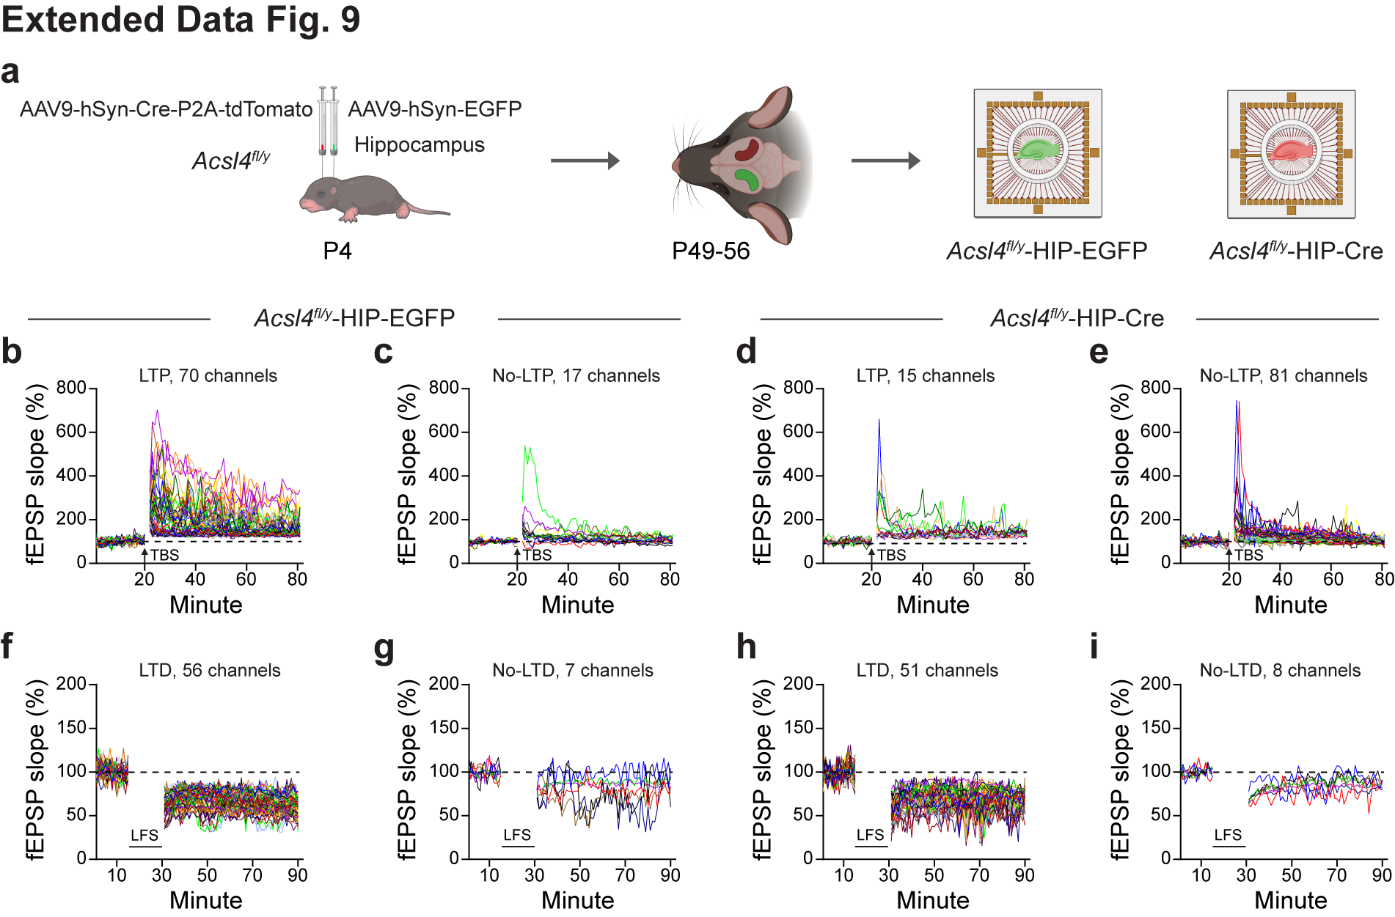
**

**Extended Data Fig 9. | Additional data of LTP and LTD in the hippocampus following AAV-Cre mediated deletion of *Acsl4*. a**,Schematic diagram of the experimental design for MED64 recording. **b**-**i**, Pooled data of LTP/LTD from MED64 individual electrode channels for *Acsl4fl/y*mice injected with AAV-EGFP (*Acsl4fl/y*-HIP-EGFP) or AAV-Cre (*Acsl4fl/y*-HIP-Cre) virus into the hippocampus. fEPSP slope changes of 70 LTP channels (**b**) and 17 No-LTP channels (**c**) that received TBS from 5 slices analyzed for 5 *Acsl4fl/y*-HIP-EGFP mice. fEPSP slope changes of 15 LTP channels (**d**) and 81 No-LTP channels (**e**) that received TBS from 5 slices analyzed for 5 *Acsl4fl/y*-HIP-Cre mice. fEPSP slope changes of 56 LTD channels (**f**) and 7 No-LTD channels (**g**) that received LFS from 4 slices analyzed for 4 *Acsl4fl/y*-HIP-EGFP mice. fEPSP slope changes of 51 LTD channels (**h**) and 8 No-LTD channels (**i**) that received LFS from 4 slices analyzed for 4 *Acsl4fl/y*-HIP-Cre mice. Cartoons were made using BioRender. See Source Data for detailed statistics.


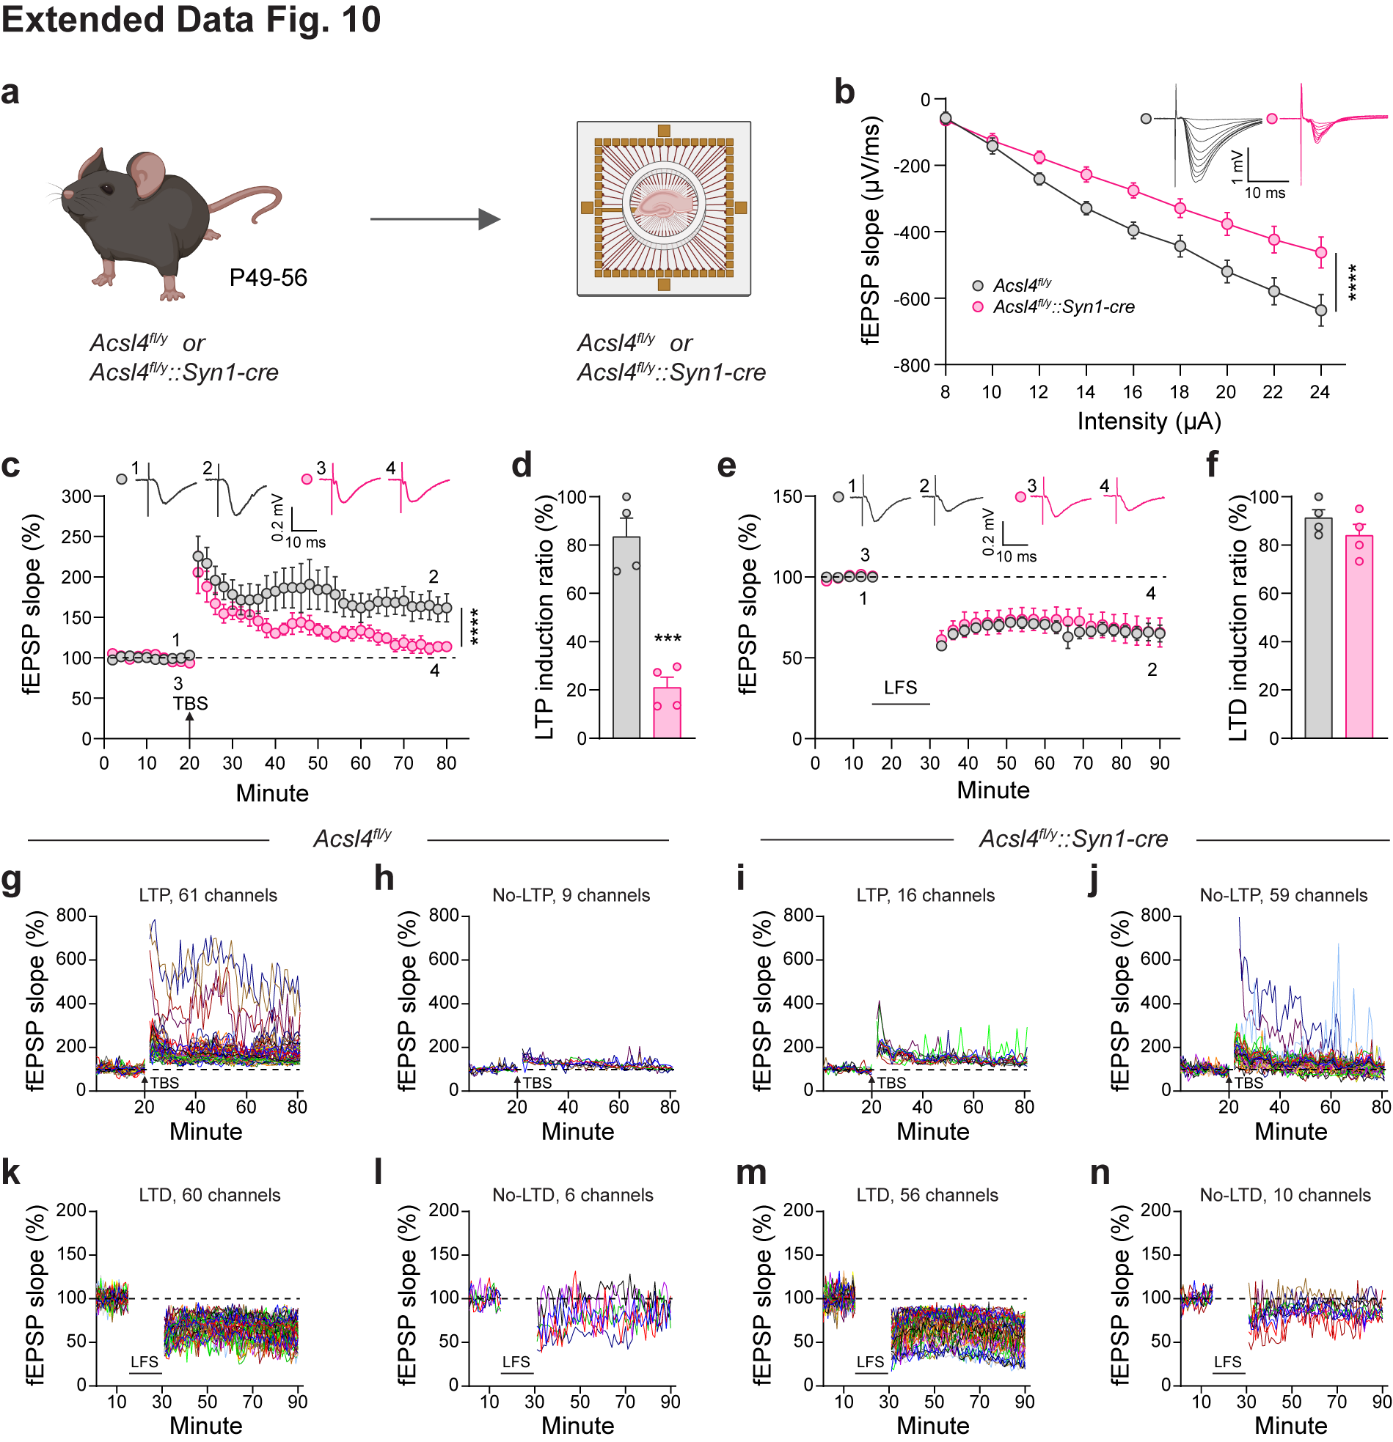


**Extended Data Fig 10. | See next page for caption.**

**Extended Data Fig 10. | Neuron-specific deletion of *Acsl4* impairs LTP but not LTD in the hippocampus. a**, Schematic diagram of the experimental design for MED64 recording. **b**, Representative traces and input-output curves of the fEPSP slope in response to a series of graded stimulation intensities. n = 6 slices from 3 mice per group. **c**, **d**, TBS-induced LTP at Schaffer collateral (SC) to CA1 synapses. Representative fEPSP traces at the time points indicated and summary plot of fEPSP slopes (**c**). The arrow indicates TBS application. Induction ratios of CA1 LTP (**d**). n = 4 slices from 4 mice per group. **e**, **f**, LFS-induced LTD at Schaffer collateral (SC) to CA1 synapses. Representative fEPSP traces at the time points indicated and summary plot of fEPSP slopes (**e**). The bar indicates LFS application. Induction ratios of CA1 LTD (**f**). n = 4 slices from 4 mice per group. **g**-**n**, Pooled data of LTP/LTD from MED64 individual electrode channels for *Acsl4fl/y*and *Acsl4fl/y::Syn1-cre* mice. fEPSP slope changes of 61 LTP channels (**g**) and 9 No-LTP channels (**h**) that received TBS from 4 slices analyzed for 4 *Acsl4fl/y*mice. fEPSP slope changes of 16 LTP channels (**i**) and 59 No-LTP channels (**j**) that received TBS from 4 slices analyzed for 4 *Acsl4fl/y::Syn1-cre* mice. fEPSP slope changes of 60 LTD channels (**k**) and 6 No-LTP channels (**l**) that received LFS from 4 slices analyzed for 4 *Acsl4fl/y*mice. fEPSP slope changes of 56 LTD channels (**m**) and 10 No-LTP channels (**n**) that received LFS from 4 slices analyzed for 4 *Acsl4fl/y::Syn1-cre* mice.

Cartoons were made using BioRender. ****P* < 0.001, *****P* < 0.0001. Two-way ANOVA test (**b**, **c**, **e**) or two-tailed unpaired t-test (**d**, **f**). Data are presented as mean ± SEM (**b**-**f**). See Source Data for detailed statistics.


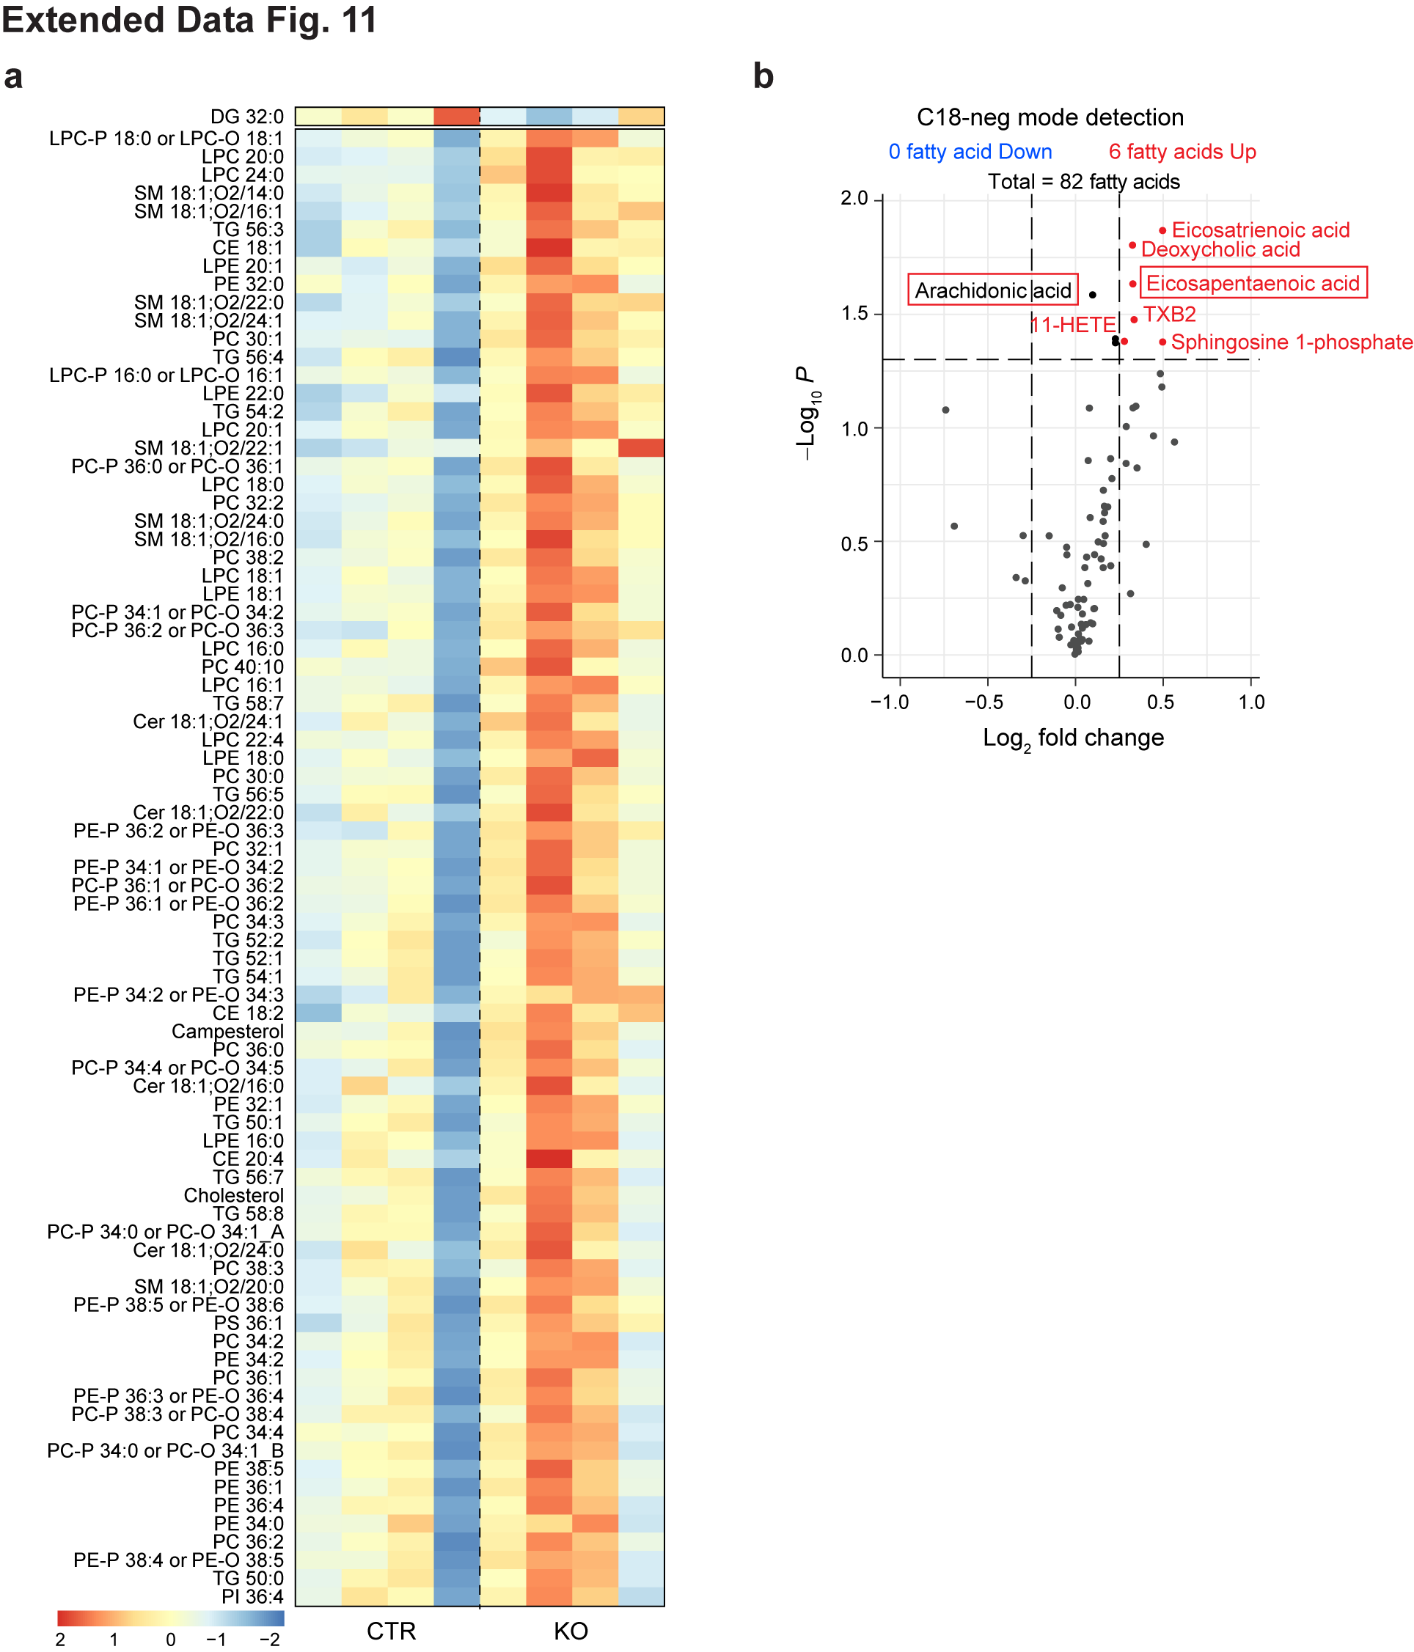


**Extended Data Fig 11. | Additional data for hippocampal lipidomic analysis. a**, Heatmaps of differentially accumulated lipids with C8-positive ion mode analysis in *Acsl4*-deficient (KO) versus control (CTR) hippocampus. **b**, Volcano plot showing differentially accumulated fatty acids in C18-negative ion mode analysis of CTR and KO hippocampus (KO vs. CTR). Differentially accumulated fatty acids are defined as those with *P* < 0.05 and log2(fold change) > 0.25 or < -0.25. Red indicates upregulated fatty acids. See Source Data for detailed statistics.


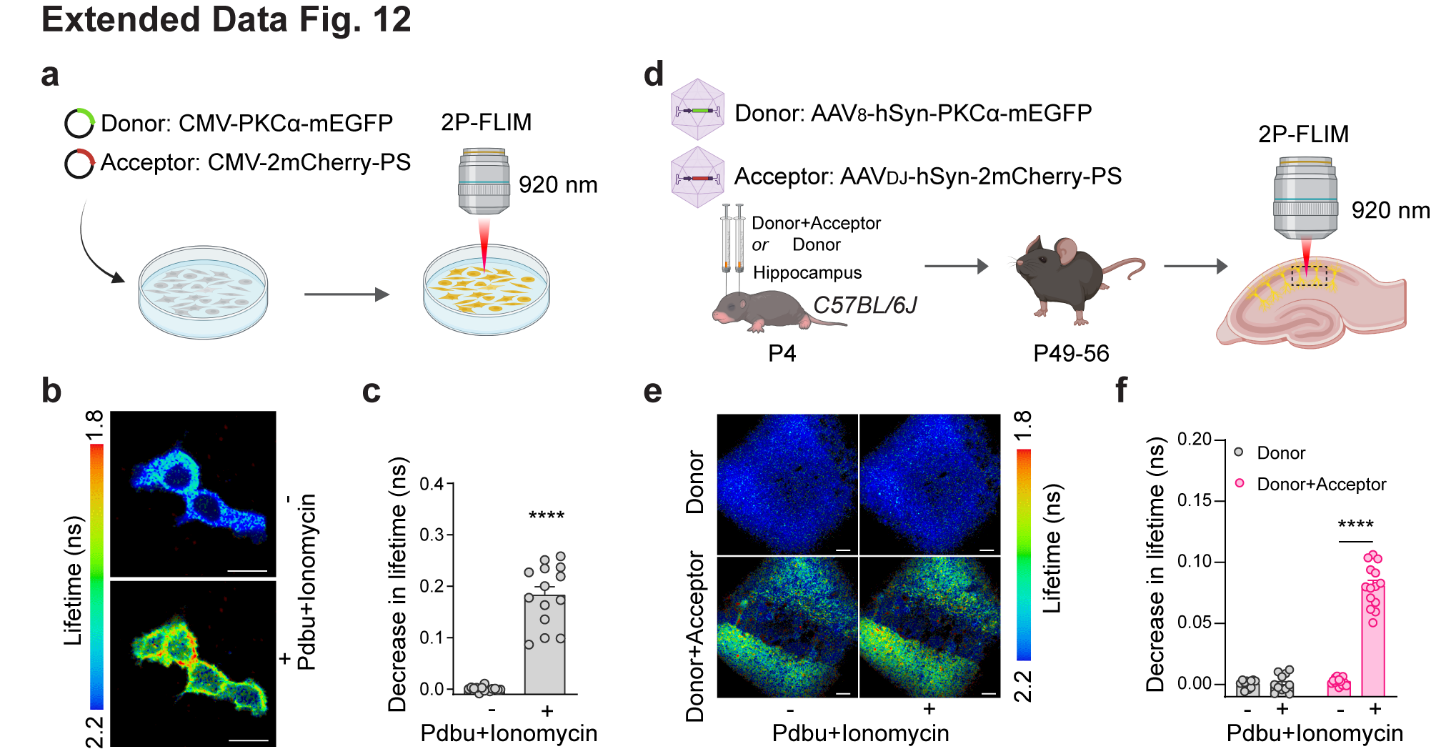


**Extended Data Fig 12. | Verification of the PKCα sensor. a**-**c**, *In vitro* verification of the PKCα sensor. Workflow for transfection of PKCα sensor plasmid constructs (Donor and Acceptor) into HEK293T cells, followed by 2P-FLIM imaging (**a**). Representative images (**b**) and quantification (**c**) of fluorescent lifetime in HEK293T cells before and 10 minutes after the stimulation with PDBu (1 μM) and ionomycin (1 μM). Scale bar: 20 μm. n = 14 cells from 3 culture dishes. **d**-**f**, *Ex vivo* verification of the PKCα sensor. Workflow for stereotaxic injection of PKCα sensor AAVs into the hippocampus, followed by 2P-FLIM imaging on hippocampal brain slices (**d**). Representative images (**e**) and quantification (**f**) of fluorescent lifetime from hippocampal CA1 tissues expressing both Donor and Acceptor vectors or the Donor vector alone, before and 10 minutes after the stimulation with PDBu (1 μM) and ionomycin (1 μM). Scale bar: 20 μm. n = 12 to 14 slices from 3 mice. Cartoons were made using BioRender. *****P* < 0.0001. Paired t-test (**c**, f). Data are presented as mean ± SEM. See Source Data for detailed statistics.


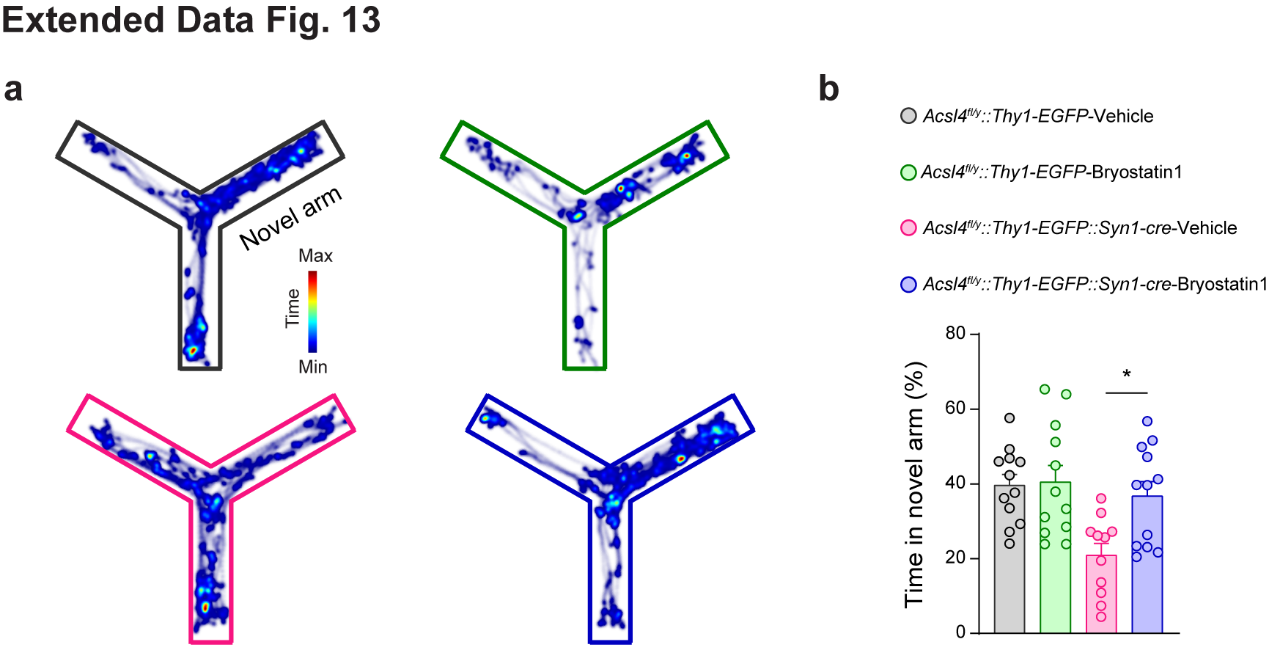


**Extended Data Fig 13. | Effects of Bryostatin 1 treatment in Y-maze tests on neuron-specific *Acsl4* deficiency mice. a**, Representative traces of exploration patterns. **b**, Percentage of time spent in the novel arm. n = 11 to 12 mice per group. **P* < 0.05. One-way ANOVA test. Data are presented as mean ± SEM. See Source Data for detailed statistics.


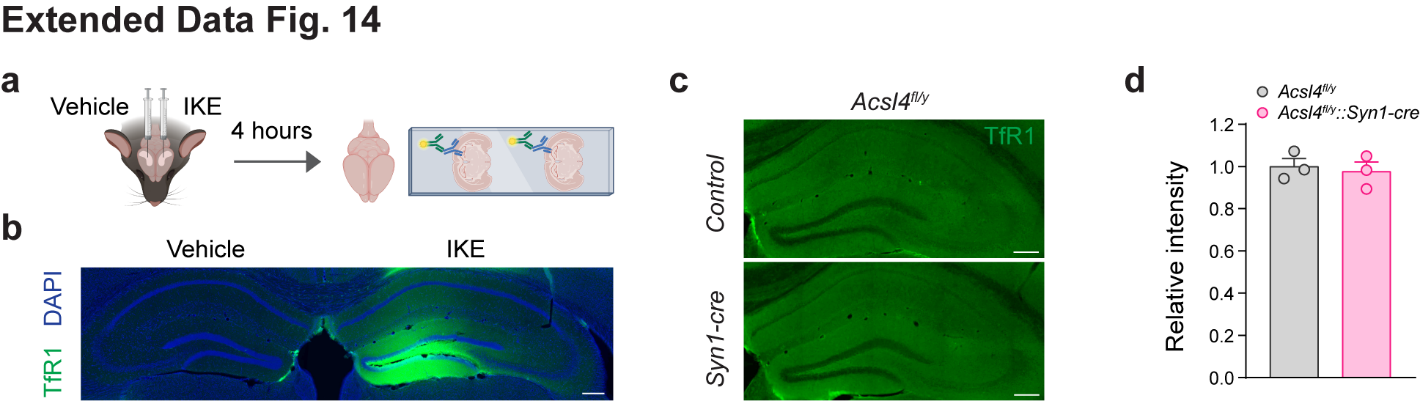


**Extended Data Fig 14. | Assessment of ferroptosis following Acsl4 deletion in the brain. a**, Experimental diagram for inducing ferroptosis in the hippocampus via stereotaxic injection of imidazole ketone erastin (IKE), a ferroptosis inducer, followed by immunofluorescent staining against a ferroptosis marker, transferrin receptor 1 (TfR1). **b**, Representative images of immunofluorescent staining against TfR1 (green). Scale bar: 200 μm. **c**, **d**, Representative images (**c**) and fluorescent intensity quantification (**d**) of TfR1 immunofluorescence signals in the hippocampus of *Acsl4fl/y* and *Acsl4fl/y::Syn1-cre* mice. Scale bar: 200 μm. n = 3 mice per group. Cartoons were made using BioRender. Two-tailed Mann Whitney test. Data are presented as mean ± SEM. See Source Data for detailed statistics.
