# Supplementary material for: Acsl4-mediated Lipid Homeostasis Orchestrates Synaptic and Cognitive Plasticity
Source: Research Square preprint supplement (doi:10.21203/rs.3.rs-7437638/v1), 2026-04-28
Supplement: Supplementary file 3 [file f1ae3cd36e5ada8aac2faf19.xlsx]

## Sheet: Expression_Profile.mm10.gene
Gene_ID	Transcript_ID	Gene_Symbol	Description	gene_biotype	Protein_ID	MGI	IMGT/GENE-DB	CTR1_Read_Count	KO1_Read_Count	CTR2_Read_Count	KO2_Read_Count	CTR3_Read_Count	KO3_Read_Count
11287	NM_007376	Pzp	PZP, alpha-2-macroglobulin like	protein_coding	NP_031402.3	87854	.	0	2	2	0	0	0
11298	NM_009591,NR_033223,XM_030245473,XM_030245474	Aanat	arylalkylamine N-acetyltransferase	protein_coding	NP_033721.1;XP_030101333.1;XP_030101334.1	1328365	.	0	2	0	0	0	0
11302	NM_001198785,NM_001198787,NM_001377503,NM_007377,NR_165305,NR_165306,XM_006531991,XM_006531992,XM_006531993,XM_006531994,XM_006531995,XR_003949229	Aatk	apoptosis-associated tyrosine kinase	protein_coding	NP_001185714.1;NP_001185716.1;NP_001364432.1;NP_031403.2;XP_006532054.1;XP_006532055.1;XP_006532056.1;XP_006532057.1;XP_006532058.1	1197518	.	11269	13059	14253	12560	11315	10232
11303	NM_013454,XM_006537554,XM_006537555,XM_006537556	Abca1	ATP-binding cassette, sub-family A (ABC1), member 1	protein_coding	NP_038482.3;XP_006537617.1;XP_006537618.1;XP_006537619.1	99607	.	1807	2979	1800	1771	1262	2610
11304	NM_007378,XM_006500911,XM_006500912,XM_017319439,XM_017319440,XR_003954273,XR_375477,XR_375478	Abca4	ATP-binding cassette, sub-family A (ABC1), member 4	protein_coding	NP_031404.1;XP_006500974.1;XP_006500975.1;XP_017174928.1;XP_017174929.1	109424	.	662	40	57	48	100	75
11305	NM_001368624,NM_007379,XM_006497609,XM_006497610,XM_006497611,XM_006497614,XM_006497615,XM_006497616,XM_030246714,XM_030246727	Abca2	ATP-binding cassette, sub-family A (ABC1), member 2	protein_coding	NP_001355553.1;NP_031405.2;XP_006497672.1;XP_006497673.1;XP_006497674.1;XP_006497677.1;XP_006497678.1;XP_006497679.1;XP_030102574.1;XP_030102587.1	99606	.	10937	13743	13622	11265	9357	9639
11306	NM_009592	Abcb7	ATP-binding cassette, sub-family B (MDR/TAP), member 7	protein_coding	NP_033722.1	109533	.	1944	1872	1818	1899	1727	1853
11307	NM_009593	Abcg1	ATP binding cassette subfamily G member 1	protein_coding	NP_033723.1	107704	.	3911	4445	4537	3807	3459	3413
11308	NM_001077190,NM_001077192,NM_001077193,NM_001331043,NM_001331044,NM_001331045,NM_001377510,NM_001377511,NM_001377512,NM_001377513,NM_007380,NM_145994,XM_006497619	Abi1	abl-interactor 1	protein_coding	NP_001070658.1;NP_001070660.1;NP_001070661.1;NP_001317972.1;NP_001317973.1;NP_001317974.1;NP_001364439.1;NP_001364440.1;NP_001364441.1;NP_001364442.1;NP_031406.2;NP_666106.1;XP_006497682.1	104913	.	8755	8352	8614	8366	7968	7169
11350	NM_001112703,NM_001283045,NM_001283046,NM_001283047,NM_009594,XM_006497621	Abl1	c-abl oncogene 1, non-receptor tyrosine kinase	protein_coding	NP_001106174.1;NP_001269974.1;NP_001269975.1;NP_001269976.1;NP_033724.2;XP_006497684.1	87859	.	2335	2858	2805	2638	2163	2328
11352	NM_001136104,NM_009595,XM_006496613,XM_006496614,XM_006496615,XM_006496616,XM_006496617,XM_006496620,XM_006496621,XM_006496622,XM_011238737,XM_011238738	Abl2	v-abl Abelson murine leukemia viral oncogene 2 (arg, Abelson-related gene)	protein_coding	NP_001129576.1;NP_033725.2;XP_006496676.1;XP_006496677.1;XP_006496678.1;XP_006496679.1;XP_006496680.1;XP_006496683.1;XP_006496684.1;XP_006496685.1;XP_011237039.1;XP_011237040.1	87860	.	5126	4937	5460	5095	4737	4280
11354	NM_009596	Scgb1b27	secretoglobin, family 1B, member 27	protein_coding	NP_033726.1	87862	.	0	0	0	0	0	0
11363	NM_007381	Acadl	acyl-Coenzyme A dehydrogenase, long-chain	protein_coding	NP_031407.2	87866	.	1315	1593	1351	1494	1171	1827
11364	NM_007382	Acadm	acyl-Coenzyme A dehydrogenase, medium chain	protein_coding	NP_031408.1	87867	.	1150	1534	1288	1375	1207	1436
11370	NM_017366	Acadvl	acyl-Coenzyme A dehydrogenase, very long chain	protein_coding	NP_059062.1	895149	.	1483	1824	1495	1452	1348	1621
11409	NM_007383	Acads	acyl-Coenzyme A dehydrogenase, short chain	protein_coding	NP_031409.2	87868	.	267	359	262	298	233	305
11416	NM_001272035,NM_001331067,NM_015728	Slc33a1	solute carrier family 33 (acetyl-CoA transporter), member 1	protein_coding	NP_001258964.1;NP_001317996.1;NP_056543.2	1332247	.	985	1048	924	925	984	963
11418	NM_001034013,NM_007384,XM_006531996	Asic2	acid-sensing (proton-gated) ion channel 2	protein_coding	NP_001029185.1;NP_031410.1;XP_006532059.1	1100867	.	2315	2288	2826	2548	2457	1936
11419	NM_001289791,NM_009597,XM_006520295,XM_006520297,XM_006520298	Asic1	acid-sensing (proton-gated) ion channel 1	protein_coding	NP_001276720.1;NP_033727.1;XP_006520358.1;XP_006520360.1;XP_006520361.1	1194915	.	752	799	779	814	795	719
11421	NM_001281819,NM_009598,NM_207624	Ace	angiotensin I converting enzyme (peptidyl-dipeptidase A) 1	protein_coding	NP_001268748.1;NP_033728.1;NP_997507.1	87874	.	2595	384	348	318	524	472
11423	NM_001290010,NM_009599,XM_006504547,XM_006504548,XM_017320605,XR_001784593	Ache	acetylcholinesterase	protein_coding	NP_001276939.1;NP_033729.1;XP_006504610.1;XP_006504611.1;XP_017176094.1	87876	.	1945	1744	2013	2036	1897	1197
11425	NM_007385	Apoc4	apolipoprotein C-IV	protein_coding	NP_031411.1	87878	.	0	2	0	0	0	0
11426	NM_001199136,NM_001199137,XM_011240411,XM_011240414,XM_011240415,XM_011240416,XM_011240417,XM_011240418,XM_017319920,XM_030253096,XM_030253097	Macf1	microtubule-actin crosslinking factor 1	protein_coding	NP_001186065.1;NP_001186066.1;XP_011238713.2;XP_011238716.1;XP_011238717.2;XP_011238718.2;XP_011238719.2;XP_011238720.1;XP_017175409.1;XP_030108956.1;XP_030108957.1	108559	.	8579	9095	10334	8985	8231	9338
11428	NM_007386	Aco1	aconitase 1	protein_coding	NP_031412.2	87879	.	1322	1488	1385	1408	1382	1332
11429	NM_080633	Aco2	aconitase 2, mitochondrial	protein_coding	NP_542364.1	87880	.	22959	23139	24564	24167	23301	19466
11430	NM_001271898,NM_001377521,NM_001377522,NM_015729	Acox1	acyl-Coenzyme A oxidase 1, palmitoyl	protein_coding	NP_001258827.1;NP_001364450.1;NP_001364451.1;NP_056544.2	1330812	.	8870	9736	9201	9341	8914	8668
11431	NM_001110239,NM_021330,XR_381176	Acp1	acid phosphatase 1, soluble	protein_coding	NP_001103709.1;NP_067305.2	87881	.	1696	1901	1220	1046	1103	1054
11432	NM_001357067,NM_007387,XM_011239257,XR_003950055	Acp2	acid phosphatase 2, lysosomal	protein_coding	NP_001343996.1;NP_031413.1;XP_011237559.1	87882	.	4414	4419	4573	4644	4327	3653
11433	NM_001102404,NM_001102405,NM_007388,XM_006509944,XM_006509945,XM_006509946,XM_011242384,XM_030244020,XM_030244022	Acp5	acid phosphatase 5, tartrate resistant	protein_coding	NP_001095874.1;NP_001095875.1;NP_031414.1;XP_006510007.1;XP_006510008.1;XP_006510009.1;XP_011240686.1;XP_030099880.1;XP_030099882.1	87883	.	20	12	5	25	18	19
11434	NM_001205049,NM_001277245,NM_001277246,NM_001277247,NM_013455,XM_006520299,XM_006520300,XM_030248276,XM_030248277	Acr	acrosin prepropeptide	protein_coding	NP_001191978.1;NP_001264174.1;NP_001264175.1;NP_001264176.1;NP_038483.1;XP_006520362.1;XP_006520363.1;XP_030104136.1;XP_030104137.1	87884	.	24	21	21	14	19	13
11435	NM_007389	Chrna1	cholinergic receptor, nicotinic, alpha polypeptide 1 (muscle)	protein_coding	NP_031415.2	87885	.	101	134	89	105	81	71
11438	NM_015730,XM_006500551,XM_030246772	Chrna4	cholinergic receptor, nicotinic, alpha polypeptide 4	protein_coding	NP_056545.3;XP_006500614.1;XP_030102632.1	87888	.	560	453	762	551	579	409
11440	NM_021369	Chrna6	cholinergic receptor, nicotinic, alpha polypeptide 6	protein_coding	NP_067344.2	106213	.	0	11	0	0	3	7
11441	NM_007390	Chrna7	cholinergic receptor, nicotinic, alpha polypeptide 7	protein_coding	NP_031416.3	99779	.	939	998	944	1034	899	929
11443	NM_009601,XM_006532003,XM_006532004,XR_003949231	Chrnb1	cholinergic receptor, nicotinic, beta polypeptide 1 (muscle)	protein_coding	NP_033731.3;XP_006532066.1;XP_006532067.1	87890	.	20	14	14	16	0	15
11444	NM_009602,XM_030252389	Chrnb2	cholinergic receptor, nicotinic, beta polypeptide 2 (neuronal)	protein_coding	NP_033732.2;XP_030108249.1	87891	.	2525	2481	2705	2656	2570	2329
11447	NM_021600	Chrnd	cholinergic receptor, nicotinic, delta polypeptide	protein_coding	NP_067611.2	87893	.	0	0	0	0	0	0
11448	NM_009603,XM_006532006,XM_006532007	Chrne	cholinergic receptor, nicotinic, epsilon polypeptide	protein_coding	NP_033733.1;XP_006532069.1;XP_006532070.1	87894	.	0	8	2	10	0	0
11449	NM_009604,XM_006529078	Chrng	cholinergic receptor, nicotinic, gamma polypeptide	protein_coding	NP_033734.3;XP_006529141.1	87895	.	0	0	0	0	0	0
11450	NM_009605	Adipoq	adiponectin, C1Q and collagen domain containing	protein_coding	NP_033735.3	106675	.	0	0	0	2	0	3
11451	NM_007391,XM_030244023	Acrv1	acrosomal vesicle protein 1	protein_coding	NP_031417.2;XP_030099883.1	104590	.	0	0	0	0	0	0
11459	NM_001272041,NM_009606	Acta1	actin, alpha 1, skeletal muscle	protein_coding	NP_001258970.1;NP_033736.1	87902	.	137	171	167	180	148	117
11461	NM_007393,XM_030254057	Actb	actin, beta	protein_coding	NP_031419.1;XP_030109917.1	87904	.	47246	51440	53668	51131	46825	41062
11464	NM_009608	Actc1	actin, alpha, cardiac muscle 1	protein_coding	NP_033738.1	87905	.	0	0	0	0	0	0
11465	NM_001313923,NM_009609	Actg1	actin, gamma, cytoplasmic 1	protein_coding	NP_001300852.1;NP_033739.1	87906	.	34634	36283	36991	36743	35197	29790
11468	NM_009610	Actg2	actin, gamma 2, smooth muscle, enteric	protein_coding	NP_033740.2	104589	.	2	0	0	0	0	0
11470	NM_009611	Actl7a	actin-like 7a	protein_coding	NP_033741.1	1343051	.	0	0	0	0	0	0
11471	NM_025271	Actl7b	actin-like 7b	protein_coding	NP_079547.2	1343053	.	0	2	0	2	0	0
11472	NM_033268,XM_011244263	Actn2	actinin alpha 2	protein_coding	NP_150371.4;XP_011242565.1	109192	.	723	716	648	693	677	568
11474	NM_013456	Actn3	actinin alpha 3	protein_coding	NP_038484.1	99678	.	40	39	33	41	30	26
11475	NM_007392,XM_006526606	Acta2	actin, alpha 2, smooth muscle, aorta	protein_coding	NP_031418.1;XP_006526669.1	87909	.	370	707	393	428	275	503
11477	NM_001110204,NM_001110205,NM_001355048,NM_001355049,NM_007394,XM_006497622	Acvr1	activin A receptor, type 1	protein_coding	NP_001103674.1;NP_001103675.1;NP_001341977.1;NP_001341978.1;NP_031420.2;XP_006497685.1	87911	.	2033	1948	2083	2134	1691	1600
11479	NM_007395	Acvr1b	activin A receptor, type 1B	protein_coding	NP_031421.1	1338944	.	5111	5045	5931	5635	5554	4790
11480	NM_007396,XM_006497623	Acvr2a	activin receptor IIA	protein_coding	NP_031422.3;XP_006497686.1	102806	.	1672	1632	1610	1589	1655	1666
11481	NM_001313757,NM_007397,XM_006511926,XM_030244026,XR_379846	Acvr2b	activin receptor IIB	protein_coding	NP_001300686.1;NP_031423.1;XP_006511989.1;XP_030099886.1	87912	.	436	484	494	515	485	621
11482	NM_001277255,NM_001277257,NM_001277258,NM_001277259,NM_009612	Acvrl1	activin A receptor, type II-like 1	protein_coding	NP_001264184.1;NP_001264186.1;NP_001264187.1;NP_001264188.1;NP_033742.2	1338946	.	455	584	494	518	431	487
11484	NM_023113,XM_006532010,XM_006532011,XM_006532012,XM_006532013,XM_011248673,XM_030245478	Aspa	aspartoacylase	protein_coding	NP_075602.2;XP_006532073.2;XP_006532074.1;XP_006532075.1;XP_006532076.2;XP_011246975.1;XP_030101338.1	87914	.	810	1473	816	886	531	916
11486	NM_001272052,NM_007398	Ada	adenosine deaminase	protein_coding	NP_001258981.1;NP_031424.1	87916	.	21	61	25	29	20	44
11487	NM_007399,XM_011242657,XM_030244027	Adam10	a disintegrin and metallopeptidase domain 10	protein_coding	NP_031425.2;XP_011240959.1;XP_030099887.1	109548	.	3745	4237	3897	4034	3551	4324
11488	NM_001110778,NM_009613,XM_006532014,XM_006532015,XM_006532016,XM_006532017,XM_006532018,XM_006532019,XM_006532020,XM_017314225,XM_030245479,XR_388328	Adam11	a disintegrin and metallopeptidase domain 11	protein_coding	NP_001104248.1;NP_033743.2;XP_006532077.1;XP_006532078.1;XP_006532079.1;XP_006532080.1;XP_006532081.1;XP_006532082.1;XP_006532083.1;XP_017169714.1;XP_030101339.1	1098667	.	9272	9567	9667	9917	9776	6842
11489	NM_007400	Adam12	a disintegrin and metallopeptidase domain 12 (meltrin alpha)	protein_coding	NP_031426.2	105378	.	135	151	173	180	136	137
11490	NM_001037722,NM_009614,XM_006500918,XR_375479,XR_375480,XR_375481,XR_375482	Adam15	a disintegrin and metallopeptidase domain 15 (metargidin)	protein_coding	NP_001032811.2;NP_033744.1;XP_006500981.1	1333882	.	2485	2991	2807	2850	2699	2561
11491	NM_001277266,NM_001291871,NM_009615,NR_102380,NR_120376,XM_030246530	Adam17	a disintegrin and metallopeptidase domain 17	protein_coding	NP_001264195.1;NP_001278800.1;NP_033745.4;XP_030102390.1	1096335	.	677	965	675	690	582	804
11492	NM_001291890,NM_001291891,NM_001311209,NM_009616,XM_030245480	Adam19	a disintegrin and metallopeptidase domain 19 (meltrin beta)	protein_coding	NP_001278819.1;NP_001278820.1;NP_001298138.1;NP_033746.1;XP_030101340.1	105377	.	743	767	679	612	656	570
11495	NM_009618,XM_006518439	Adam2	a disintegrin and metallopeptidase domain 2	protein_coding	NP_033748.2;XP_006518502.1	1340894	.	0	3	0	2	0	2
11496	NM_001007220,NM_001007221,NM_001098225,NM_001310439,NM_001310440,XM_006503528,XM_006503529,XM_006503530,XM_006503531,XM_006503532,XM_006503533,XM_006503534,XM_006503535,XM_006503536,XM_006503537,XM_006503540,XM_006503542,XM_030254064,XR_376691	Adam22	a disintegrin and metallopeptidase domain 22	protein_coding	NP_001007221.1;NP_001007222.1;NP_001091695.1;NP_001297368.1;NP_001297369.1;XP_006503591.1;XP_006503592.1;XP_006503593.1;XP_006503594.1;XP_006503595.1;XP_006503596.1;XP_006503597.1;XP_006503598.1;XP_006503599.1;XP_006503600.1;XP_006503603.1;XP_006503605.1;XP_030109924.1	1340046	.	6558	6622	6866	6671	6481	6722
11497	NM_001324489,NM_009619,XM_011242113,XM_011242114,XM_017312524	Adam3	a disintegrin and metallopeptidase domain 3 (cyritestin)	protein_coding	NP_001311418.1;NP_033749.2;XP_011240415.1;XP_011240416.1;XP_017168013.1	102518	.	5	7	0	5	0	2
11498	NM_009620	Adam4	a disintegrin and metallopeptidase domain 4	protein_coding	NP_033750.1	104731	.	14	6	7	12	9	5
11499	NM_001272057,NM_001272058,NM_001272059,NM_007401,XM_006508985,XM_011242115	Adam5	a disintegrin and metallopeptidase domain 5	protein_coding	NP_001258986.1;NP_001258987.1;NP_001258988.1;NP_031427.2;XP_006509048.1;XP_011240417.1	104730	.	15	52	7	18	28	34
11500	NM_007402	Adam7	a disintegrin and metallopeptidase domain 7	protein_coding	NP_031428.2	107247	.	0	0	0	0	0	0
11501	NM_001291066,NM_007403,XM_006536151,XM_017321932,XM_017321933,XM_017321934,XR_003946375	Adam8	a disintegrin and metallopeptidase domain 8	protein_coding	NP_001277995.1;NP_031429.1;XP_006536214.1;XP_017177421.1;XP_017177422.1;XP_017177423.1	107825	.	39	46	43	36	37	31
11502	NM_001270996,NM_007404,XM_006508986	Adam9	a disintegrin and metallopeptidase domain 9 (meltrin gamma)	protein_coding	NP_001257925.1;NP_031430.2;XP_006509049.1	105376	.	2524	2895	2622	2413	2033	2257
11504	NM_009621	Adamts1	a disintegrin-like and metallopeptidase (reprolysin type) with thrombospondin type 1 motif, 1	protein_coding	NP_033751.3	109249	.	969	1162	1096	924	730	721
11512	NM_001368413,NM_007405,XM_006520303,XM_006520306,XM_006520307,XM_006520314,XM_006520315,XM_030248279,XM_030248280,XM_030248281,XM_030248282,XM_030248283,XM_030248284,XR_001781491,XR_003951344,XR_383971,XR_383972	Adcy6	adenylate cyclase 6	protein_coding	NP_001355342.1;NP_031431.2;XP_006520366.3;XP_006520369.2;XP_006520370.1;XP_006520377.1;XP_006520378.1;XP_030104139.1;XP_030104140.1;XP_030104141.1;XP_030104142.1;XP_030104143.1;XP_030104144.1	87917	.	1095	1134	1162	1121	1241	1252
11513	NM_001037723,NM_001037724,NM_001109756,NM_007406,XM_006530580,XM_011248277,XM_011248278,XM_011248279,XM_011248280,XM_011248281,XM_011248282,XM_030243244,XM_030243245,XR_003947217,XR_003947218,XR_878769	Adcy7	adenylate cyclase 7	protein_coding	NP_001032812.2;NP_001032813.1;NP_001103226.1;NP_031432.2;XP_006530643.1;XP_011246579.1;XP_011246580.1;XP_011246581.1;XP_011246582.1;XP_011246583.1;XP_011246584.1;XP_030099104.1;XP_030099105.1	102891	.	108	137	91	125	82	108
11514	NM_001291903,NM_001331075,NM_009623	Adcy8	adenylate cyclase 8	protein_coding	NP_001278832.1;NP_001318004.1;NP_033753.2	1341110	.	684	583	768	694	813	891
11515	NM_001291910,NM_009624,XM_011245805,XM_011245806	Adcy9	adenylate cyclase 9	protein_coding	NP_001278839.1;NP_033754.2;XP_011244107.1;XP_011244108.1	108450	.	7622	7239	8494	7898	7417	6353
11516	NM_001315503,NM_001315504,NM_009625,XM_006523498,XM_006523499,XM_017317212,XM_030249450	Adcyap1	adenylate cyclase activating polypeptide 1	protein_coding	NP_001302432.1;NP_001302433.1;NP_033755.1;XP_006523561.1;XP_006523562.1;XP_017172701.1;XP_030105310.1	105094	.	50	20	64	32	277	328
11517	NM_001025372,NM_007407,XM_006505388,XM_011241150,XM_011241151,XM_011241152,XM_011241153,XM_030255112,XM_030255113,XM_030255114	Adcyap1r1	adenylate cyclase activating polypeptide 1 receptor 1	protein_coding	NP_001020543.1;NP_031433.3;XP_006505451.1;XP_011239452.1;XP_011239453.1;XP_011239454.1;XP_011239455.1;XP_030110972.1;XP_030110973.1;XP_030110974.1	108449	.	6589	8733	8044	8371	7615	8589
11518	NM_001024458,NM_001102444,NM_001331080,NM_001331081,NM_001331082,NM_001331083,NM_001331084,NM_001331085,NM_001331086,NM_001331087,NM_013457,XM_006503669,XM_006503670,XM_006503674,XM_006503675,XM_006503676,XM_006503677,XM_006503678,XM_006503679,XM_006503680,XM_017320615,XM_030254065,XM_030254066,XM_030254067,XM_030254068,XM_030254069,XM_030254070,XM_030254071,XM_030254072,XM_030254073	Add1	adducin 1 (alpha)	protein_coding	NP_001019629.2;NP_001095914.1;NP_001318009.1;NP_001318010.1;NP_001318011.1;NP_001318012.1;NP_001318013.1;NP_001318014.1;NP_001318015.1;NP_001318016.1;NP_038485.1;XP_006503732.1;XP_006503733.1;XP_006503737.1;XP_006503738.1;XP_006503739.1;XP_006503740.1;XP_006503741.1;XP_006503742.1;XP_006503743.1;XP_017176104.1;XP_030109925.1;XP_030109926.1;XP_030109927.1;XP_030109928.1;XP_030109929.1;XP_030109930…	87918	.	19347	19650	21059	20690	19390	16882
11519	NM_001271857,NM_001271858,NM_001271859,NM_001271860,NM_001271861,NM_013458	Add2	adducin 2 (beta)	protein_coding	NP_001258786.1;NP_001258787.1;NP_001258788.1;NP_001258789.1;NP_001258790.1;NP_038486.2	87919	.	21468	20644	24088	22934	20154	15975
11520	NM_007408,XM_006537557,XM_011249907	Plin2	perilipin 2	protein_coding	NP_031434.3;XP_006537620.1;XP_011248209.1	87920	.	208	349	259	255	170	281
11522	NM_007409	Adh1	alcohol dehydrogenase 1 (class I)	protein_coding	NP_031435.1	87921	.	4	18	4	16	5	6
11529	NM_009626,XM_006500919	Adh7	alcohol dehydrogenase 7 (class IV), mu or sigma polypeptide	protein_coding	NP_033756.2;XP_006500982.1	87926	.	2	0	0	0	0	4
11532	NM_001288578,NM_007410	Adh5	alcohol dehydrogenase 5 (class III), chi polypeptide	protein_coding	NP_001275507.1;NP_031436.2	87929	.	1878	2391	2065	2116	2050	2202
11534	NM_001243041,NM_134079,XM_006518440,XM_006518441,XM_030247610,XM_030247611	Adk	adenosine kinase	protein_coding	NP_001229970.1;NP_598840.1;XP_006518503.1;XP_006518504.1;XP_030103470.1;XP_030103471.1	87930	.	1746	2497	1903	2208	1853	2125
11535	NM_009627	Adm	adrenomedullin	protein_coding	NP_033757.1	108058	.	41	34	57	36	44	34
11536	NM_007412	Gpr182	G protein-coupled receptor 182	protein_coding	NP_031438.2	109545	.	49	44	56	55	31	53
11537	NM_001291915,NM_001329541,NM_013459	Cfd	complement factor D (adipsin)	protein_coding	NP_001278844.1;NP_001316470.1;NP_038487.1	87931	.	0	0	0	0	0	0
11538	NM_001310086,NM_001310088,NM_009628	Adnp	activity-dependent neuroprotective protein	protein_coding	NP_001297015.1;NP_001297017.1;NP_033758.2	1338758	.	2188	4606	2939	5417	4088	3765
11539	NM_001008533,NM_001039510,NM_001282945,NM_001291928,NM_001291930,XM_006529079	Adora1	adenosine A1 receptor	protein_coding	NP_001008533.1;NP_001034599.1;NP_001269874.1;NP_001278857.1;NP_001278859.1;XP_006529142.1	99401	.	16172	17795	18858	18373	16779	13441
11540	NM_001331095,NM_001331096,NM_009630,XM_006513093,XM_030244829	Adora2a	adenosine A2a receptor	protein_coding	NP_001318024.1;NP_001318025.1;NP_033760.2;XP_006513156.1;XP_030100689.1	99402	.	42	70	68	70	46	63
11541	NM_007413	Adora2b	adenosine A2b receptor	protein_coding	NP_031439.2	99403	.	186	238	143	148	122	150
11542	NM_009631	Adora3	adenosine A3 receptor	protein_coding	NP_033761.2	104847	.	40	78	36	52	55	62
11544	NM_007414	Adprh	ADP-ribosylarginine hydrolase	protein_coding	NP_031440.1	1098234	.	3022	3467	3578	3635	3499	2732
11545	NM_007415	Parp1	poly (ADP-ribose) polymerase family, member 1	protein_coding	NP_031441.2	1340806	.	5923	5541	6216	5730	5740	4567
11546	NM_009632,XM_006518442	Parp2	poly (ADP-ribose) polymerase family, member 2	protein_coding	NP_033762.1;XP_006518505.1	1341112	.	437	479	446	448	446	445
11548	NM_001284380,NM_001284381,NM_007416,XM_011248675	Adra1b	adrenergic receptor, alpha 1b	protein_coding	NP_001271309.1;NP_001271310.1;NP_031442.2;XP_011246977.1	104774	.	64	55	114	79	90	65
11549	NM_001271759,NM_001271760,NM_001271761,NM_013461,XM_006518444,XM_006518449,XM_011244923,XM_011244924,XM_011244925,XM_011244926,XM_017315800,XM_017315801,XM_017315802	Adra1a	adrenergic receptor, alpha 1a	protein_coding	NP_001258688.1;NP_001258689.1;NP_001258690.1;NP_038489.2;XP_006518507.1;XP_006518512.1;XP_011243225.1;XP_011243226.1;XP_011243227.1;XP_011243228.1;XP_017171289.1;XP_017171290.1;XP_017171291.1	104773	.	445	533	462	494	433	495
11550	NM_013460	Adra1d	adrenergic receptor, alpha 1d	protein_coding	NP_038488.4	106673	.	2693	2702	3251	2967	2823	2182
11551	NM_007417	Adra2a	adrenergic receptor, alpha 2a	protein_coding	NP_031443.4	87934	.	236	444	340	360	368	516
11552	NM_009633	Adra2b	adrenergic receptor, alpha 2b	protein_coding	NP_033763.3	87935	.	2	6	1	2	2	2
11553	NM_007418	Adra2c	adrenergic receptor, alpha 2c	protein_coding	NP_031444.2	87936	.	579	469	717	729	652	737
11554	NM_007419	Adrb1	adrenergic receptor, beta 1	protein_coding	NP_031445.2	87937	.	357	333	410	404	452	502
11555	NM_007420	Adrb2	adrenergic receptor, beta 2	protein_coding	NP_031446.2	87938	.	50	67	49	52	36	57
11556	NM_013462,XM_030243246,XM_030243247,XR_003947219,XR_003947220	Adrb3	adrenergic receptor, beta 3	protein_coding	NP_038490.2;XP_030099106.1;XP_030099107.1	87939	.	9	18	11	23	15	17
11564	NM_009634	Adsl	adenylosuccinate lyase	protein_coding	NP_033764.2	103202	.	726	794	690	776	681	793
11565	NM_007421	Adssl1	adenylosuccinate synthetase like 1	protein_coding	NP_031447.1	87947	.	559	862	656	626	494	592
11566	NM_007422,XR_001785476	Adss	adenylosuccinate synthetase, non muscle	protein_coding	NP_031448.2	87948	.	2431	2436	2472	2579	2484	2499
11567	NM_009635,XM_006513097,XM_006513098,XM_006513099,XM_006513100,XM_006513101,XM_006513102,XR_871691	Avil	advillin	protein_coding	NP_033765.2;XP_006513160.1;XP_006513161.1;XP_006513162.1;XP_006513163.1;XP_006513164.1;XP_006513165.1	1333798	.	0	6	0	17	10	6
11568	NM_001291857,NM_009636	Aebp1	AE binding protein 1	protein_coding	NP_001278786.1;NP_033766.2	1197012	.	762	1281	710	715	467	830
11569	NM_001005605,NM_001309436,NM_001309437,NM_009637,NM_178803,XM_006506905,XM_006506906,XM_006506909,XM_017321346	Aebp2	AE binding protein 2	protein_coding	NP_001005605.1;NP_001296365.1;NP_001296366.1;NP_033767.2;NP_848918.1;XP_006506968.1;XP_006506969.1;XP_006506972.1;XP_017176835.1	1338038	.	2313	2260	2438	2251	2294	2237
11571	NM_009638	Crisp1	cysteine-rich secretory protein 1	protein_coding	NP_033768.3	102553	.	0	0	0	0	0	0
11572	NM_009639	Crisp3	cysteine-rich secretory protein 3	protein_coding	NP_033769.1	102552	.	0	0	0	0	0	0
11576	NM_007423	Afp	alpha fetoprotein	protein_coding	NP_031449.3	87951	.	0	5	0	0	2	0
11593	NM_001005847,NM_001205054,XM_006509249,XR_378907	Aga	aspartylglucosaminidase	protein_coding	NP_001005847.1;NP_001191983.1;XP_006509312.2	104873	.	226	259	227	263	188	233
11595	NM_001361500,NM_007424	Acan	aggrecan	protein_coding	NP_001348429.1;NP_031450.2	99602	.	329	227	359	247	222	144
11596	NM_001271422,NM_001271423,NM_001271424,NM_007425,NR_073173,NR_073175,NR_073176,XM_006523501	Ager	advanced glycosylation end product-specific receptor	protein_coding	NP_001258351.1;NP_001258352.1;NP_001258353.1;NP_031451.2;XP_006523564.1	893592	.	19	33	10	22	15	19
11600	NM_001286062,NM_009640,XM_006520323	Angpt1	angiopoietin 1	protein_coding	NP_001272991.1;NP_033770.2;XP_006520386.1	108448	.	302	561	268	334	285	441
11601	NM_007426	Angpt2	angiopoietin 2	protein_coding	NP_031452.2	1202890	.	50	55	40	36	31	39
11602	NM_009641	Angpt4	angiopoietin 4	protein_coding	NP_033771.1	1336887	.	0	5	0	8	5	0
11603	NM_001369026,NM_001369027,NM_021604,XM_006538491,XM_006538492,XM_006538493,XM_006538494,XM_006538495,XM_006538496,XM_011250176,XM_011250178,XM_017319921,XM_030253098,XR_390724,XR_881417	Agrn	agrin	protein_coding	NP_001355955.1;NP_001355956.1;NP_067617.3;XP_006538554.1;XP_006538555.1;XP_006538556.1;XP_006538557.1;XP_006538558.1;XP_006538559.1;XP_011248478.1;XP_011248480.1;XP_017175410.1;XP_030108958.1	87961	.	3731	3302	4591	3691	3605	3088
11604	NM_001271806,NM_007427	Agrp	agouti related neuropeptide	protein_coding	NP_001258735.1;NP_031453.1	892013	.	0	0	0	0	2	0
11605	NM_013463	Gla	galactosidase, alpha	protein_coding	NP_038491.2	1347344	.	637	627	654	668	628	545
11606	NM_007428,XM_030243248	Agt	angiotensinogen (serpin peptidase inhibitor, clade A, member 8)	protein_coding	NP_031454.4;XP_030099108.1	87963	.	888	1641	928	1300	1121	1714
11607	NM_177322,XM_006516534,XM_011244264,XM_030247129	Agtr1a	angiotensin II receptor, type 1a	protein_coding	NP_796296.1;XP_006516597.1;XP_011242566.1;XP_030102989.1	87964	.	19	16	22	18	20	3
11608	NM_175086	Agtr1b	angiotensin II receptor, type 1b	protein_coding	NP_780295.2	87965	.	2	0	0	0	0	0
11609	NM_007429	Agtr2	angiotensin II receptor, type 2	protein_coding	NP_031455.1	87966	.	3	11	7	7	17	18
11610	NM_001301281,NM_009642	Agtrap	angiotensin II, type I receptor-associated protein	protein_coding	NP_001288210.1;NP_033772.2	1339977	.	396	458	395	425	381	482
11611	NM_001276710,NM_016702	Agxt	alanine-glyoxylate aminotransferase	protein_coding	NP_001263639.1;NP_057911.2	1329033	.	0	0	0	2	0	0
11614	NM_007430	Nr0b1	nuclear receptor subfamily 0, group B, member 1	protein_coding	NP_031456.1	1352460	.	0	0	0	0	0	0
11615	NM_001304528	Gm4737	predicted gene 4737	protein_coding	NP_001291457.1	3643647	.	213	268	219	251	234	228
11622	NM_001314027,NM_013464	Ahr	aryl-hydrocarbon receptor	protein_coding	NP_001300956.1;NP_038492.1	105043	.	330	323	327	322	378	254
11624	NM_001317351,NM_009644,XM_006517048,XM_006517049,XM_006517050	Ahrr	aryl-hydrocarbon receptor repressor	protein_coding	NP_001304280.1;NP_033774.1;XP_006517111.1;XP_006517112.1;XP_006517113.1	1333776	.	31	33	30	39	32	31
11625	NM_001276449,NM_001276450,NM_013465,NR_075099	Ahsg	alpha-2-HS-glycoprotein	protein_coding	NP_001263378.1;NP_001263379.1;NP_038493.1	107189	.	0	0	0	0	0	0
11628	NM_009645	Aicda	activation-induced cytidine deaminase	protein_coding	NP_033775.1	1342279	.	0	0	0	0	0	0
11629	NM_001361501,NM_001361502,NM_019467,XM_006523503	Aif1	allograft inflammatory factor 1	protein_coding	NP_001348430.1;NP_001348431.1;NP_062340.1;XP_006523566.1	1343098	.	174	357	172	255	168	281
11630	NM_001368305,NM_001368306,NM_172393	Crybg1	crystallin beta-gamma domain containing 1	protein_coding	NP_001355234.1;NP_001355235.1;NP_765981.2	109544	.	65	80	51	43	36	80
11632	NM_001276284,NM_016666,XM_006531642,XM_030250709	Aip	aryl-hydrocarbon receptor-interacting protein	protein_coding	NP_001263213.1;NP_057875.1;XP_006531705.1;XP_030106569.1	109622	.	2250	2533	2470	2463	2409	2120
11634	NM_001271549,NM_001271550,NM_001271551,NM_001271552,NM_001271553,NM_001271554,NM_001271555,NM_001271556,NM_001271557,NM_001271558,NM_001271559,NM_009646,NR_073358,XM_011243277	Aire	autoimmune regulator (autoimmune polyendocrinopathy candidiasis ectodermal dystrophy)	protein_coding	NP_001258478.1;NP_001258479.1;NP_001258480.1;NP_001258481.1;NP_001258482.1;NP_001258483.1;NP_001258484.1;NP_001258485.1;NP_001258486.1;NP_001258487.1;NP_001258488.1;NP_033776.1;XP_011241579.1	1338803	.	0	8	0	4	0	0
11636	NM_001198790,NM_001198791,NM_001198792,NM_021515,XM_030246809	Ak1	adenylate kinase 1	protein_coding	NP_001185719.1;NP_001185720.1;NP_001185721.1;NP_067490.1;XP_030102669.1	87977	.	2914	3053	3149	3233	3159	2555
11637	NM_001033966,NM_016895,NR_138540	Ak2	adenylate kinase 2	protein_coding	NP_001029138.1;NP_058591.2	87978	.	490	583	477	452	473	463
11639	NM_001177602,NM_001177604,NM_001177605,NM_009647,XM_006502685,XM_017319923	Ak4	adenylate kinase 4	protein_coding	NP_001171073.1;NP_001171075.1;NP_001171076.1;NP_033777.1;XP_006502748.1;XP_017175412.1	87979	.	3627	4290	3349	4336	4581	4373
11640	NM_001042541,NM_009648,NR_104310,XM_030245481,XR_388330,XR_879507	Akap1	A kinase (PRKA) anchor protein 1	protein_coding	NP_001036006.1;NP_033778.2;XP_030101341.1	104729	.	1809	1939	2180	1898	1953	1640
11642	NM_009650	Akap3	A kinase (PRKA) anchor protein 3	protein_coding	NP_033780.2	1341149	.	6	12	9	7	5	5
11643	NM_001042542,NM_009651	Akap4	A kinase (PRKA) anchor protein 4	protein_coding	NP_001036007.1;NP_033781.2	102794	.	0	0	0	0	0	0
11647	NM_001287172,NM_007431,XM_006538497,XM_006538498,XM_006538499,XM_006538500,XM_017319924	Alpl	alkaline phosphatase, liver/bone/kidney	protein_coding	NP_001274101.1;NP_031457.2;XP_006538560.1;XP_006538561.1;XP_006538562.1;XP_006538563.1;XP_017175413.1	87983	.	267	323	272	312	255	306
11648	NM_007432	Akp3	alkaline phosphatase 3, intestine, not Mn requiring	protein_coding	NP_031458.2	87984	.	0	0	0	0	0	0
11650	NM_007433,XM_006529082,XM_011247904	Alppl2	alkaline phosphatase, placental-like 2	protein_coding	NP_031459.3;XP_006529145.1;XP_011246206.1	108009	.	0	0	0	0	0	0
11651	NM_001165894,NM_001331107,NM_009652,XM_006515415	Akt1	thymoma viral proto-oncogene 1	protein_coding	NP_001159366.1;NP_001318036.1;NP_033782.1;XP_006515478.1	87986	.	6196	6151	6985	6884	6757	6084
11652	NM_001110208,NM_001331108,NM_001331109,NM_007434,XM_006539481,XM_006539482,XM_006539483,XM_030241997,XM_030241998,XM_030241999,XM_030242000	Akt2	thymoma viral proto-oncogene 2	protein_coding	NP_001103678.1;NP_001318037.1;NP_001318038.1;NP_031460.1;XP_006539544.1;XP_006539545.1;XP_006539546.1;XP_030097857.1;XP_030097858.1;XP_030097859.1;XP_030097860.1	104874	.	3280	3303	3508	3323	3204	3242
11655	NM_001291835,NM_020559	Alas1	aminolevulinic acid synthase 1	protein_coding	NP_001278764.1;NP_065584.2	87989	.	2457	2459	2450	2450	2392	1917
11656	NM_001102446,NM_009653,XM_030251199	Alas2	aminolevulinic acid synthase 2, erythroid	protein_coding	NP_001095916.1;NP_033783.1;XP_030107059.1	87990	.	74	96	113	116	113	106
11657	NM_009654	Alb	albumin	protein_coding	NP_033784.2	87991	.	0	4	0	0	0	0
11658	NM_001331110,NM_009655	Alcam	activated leukocyte cell adhesion molecule	protein_coding	NP_001318039.1;NP_033785.1	1313266	.	4170	4009	4123	4276	4390	4906
11666	NM_007435	Abcd1	ATP-binding cassette, sub-family D (ALD), member 1	protein_coding	NP_031461.1	1349215	.	432	628	501	527	423	417
11668	NM_001361503,NM_001361504,NM_001361505,NM_001361506,NM_013467	Aldh1a1	aldehyde dehydrogenase family 1, subfamily A1	protein_coding	NP_001348432.1;NP_001348433.1;NP_001348434.1;NP_001348435.1;NP_038495.2	1353450	.	3136	4836	3792	3797	2855	3244
11669	NM_001308450,NM_009656	Aldh2	aldehyde dehydrogenase 2, mitochondrial	protein_coding	NP_001295379.1;NP_033786.1	99600	.	3141	3241	3352	3095	2839	3531
11670	NM_001112725,NM_001331112,NM_007436,XM_006532023,XM_006532024,XM_006532026,XM_006532027	Aldh3a1	aldehyde dehydrogenase family 3, subfamily A1	protein_coding	NP_001106196.1;NP_001318041.1;NP_031462.2;XP_006532086.1;XP_006532087.1;XP_006532089.1;XP_006532090.1	1353451	.	14	14	16	22	28	14
11671	NM_001331114,NM_001331115,NM_007437,NR_138545,XM_006532030,XM_006532031,XM_030245482,XR_388331,XR_388332	Aldh3a2	aldehyde dehydrogenase family 3, subfamily A2	protein_coding	NP_001318043.1;NP_001318044.1;NP_031463.2;XP_006532093.1;XP_006532094.1;XP_030101342.1	1353452	.	2222	2706	2291	2383	2375	2319
11674	NM_001177307,NM_001177308,NM_007438,XM_006507209,XM_006507210,XM_030242001	Aldoa	aldolase A, fructose-bisphosphate	protein_coding	NP_001170778.1;NP_001170779.1;NP_031464.1;XP_006507272.1;XP_006507273.1;XP_030097861.1	87994	.	78192	83362	84937	86981	85002	61208
11676	NM_001303423,NM_009657	Aldoc	aldolase C, fructose-bisphosphate	protein_coding	NP_001290352.1;NP_033787.2	101863	.	25369	32884	30544	32053	28980	32865
11677	NM_009658	Akr1b3	aldo-keto reductase family 1, member B3 (aldose reductase)	protein_coding	NP_033788.3	1353494	.	1300	1592	1333	1504	1295	1221
11682	NM_007439,XR_001782029,XR_385265	Alk	anaplastic lymphoma kinase	protein_coding	NP_031465.2	103305	.	206	140	213	180	205	185
11684	NM_001331118,NM_007440,XR_001779865	Alox12	arachidonate 12-lipoxygenase	protein_coding	NP_001318047.1;NP_031466.2	87998	.	17	20	16	17	6	21
11685	NM_145684,XM_006532034,XM_006532035	Alox12e	arachidonate lipoxygenase, epidermal	protein_coding	NP_663717.1;XP_006532097.1;XP_006532098.1	1274790	.	0	0	0	0	0	0
11686	NM_009659	Alox12b	arachidonate 12-lipoxygenase, 12R type	protein_coding	NP_033789.1	1274782	.	277	180	347	358	451	438
11687	NM_009660,XM_006532036	Alox15	arachidonate 15-lipoxygenase	protein_coding	NP_033790.3;XP_006532099.1	87997	.	72	74	127	104	91	79
11688	NM_009661	Alox8	arachidonate 8-lipoxygenase	protein_coding	NP_033791.1	1098228	.	358	339	321	320	293	215
11689	NM_009662	Alox5	arachidonate 5-lipoxygenase	protein_coding	NP_033792.1	87999	.	20	40	40	28	22	35
11690	NM_001308462,NM_009663	Alox5ap	arachidonate 5-lipoxygenase activating protein	protein_coding	NP_001295391.1;NP_033793.1	107505	.	106	173	131	158	104	109
11692	NM_001379038,NM_001379039,NM_023040	Gfer	growth factor, augmenter of liver regeneration	protein_coding	NP_001365967.1;NP_001365968.1;NP_075527.2	107757	.	427	484	499	448	453	412
11694	NM_007441	Alx3	aristaless-like homeobox 3	protein_coding	NP_031467.1	1277097	.	0	6	7	8	0	9
11695	NM_007442,XR_374395	Alx4	aristaless-like homeobox 4	protein_coding	NP_031468.1	108359	.	31	43	42	30	30	22
11698	NM_001303431,NM_009664	Ambn	ameloblastin	protein_coding	NP_001290360.1;NP_033794.1	104655	.	0	0	0	0	0	0
11699	NM_007443	Ambp	alpha 1 microglobulin/bikunin precursor	protein_coding	NP_031469.1	88002	.	0	0	0	0	0	2
11701	gene-Amd-ps1	Amd-ps1	S-adenosylmethionine decarboxylase, pseudogene 1	pseudogene	.	1310005	.	18	15	17	16	12	24
11702	NM_009665	Amd1	S-adenosylmethionine decarboxylase 1	protein_coding	NP_033795.1	88004	.	5915	7188	6577	6254	6317	6192
11704	NM_001081978,NM_001290371,NM_009666	Amelx	amelogenin, X-linked	protein_coding	NP_001075447.1;NP_001277300.1;NP_033796.1	88005	.	0	0	0	0	0	0
11705	NM_007445	Amh	anti-Mullerian hormone	protein_coding	NP_031471.2	88006	.	7	7	18	12	10	7
11717	NM_001276301,NM_001372439,NM_001372441,NM_009667,XM_006507217,XM_006507219,XM_006507222,XM_030242002,XR_378209	Ampd3	adenosine monophosphate deaminase 3	protein_coding	NP_001263230.1;NP_001359368.1;NP_001359370.1;NP_033797.2;XP_006507280.2;XP_006507282.1;XP_006507285.1;XP_030097862.1	1096344	.	653	848	690	823	693	887
11720	NM_133653,XM_006518450	Mat1a	methionine adenosyltransferase I, alpha	protein_coding	NP_598414.1;XP_006518513.1	88017	.	4	2	0	4	0	0
11722	NM_001110505,NM_007446	Amy1	amylase 1, salivary	protein_coding	NP_001103975.1;NP_031472.2	88019	.	27	35	36	34	27	36
11727	NM_001161731,NM_007447	Ang	angiogenin, ribonuclease, RNase A family, 5	protein_coding	NP_001155203.1;NP_031473.1	88022	.	41	100	61	72	67	48
11731	NM_007449	Ang2	angiogenin, ribonuclease A family, member 2	protein_coding	NP_031475.2	104984	.	0	0	0	0	0	0
11732	NM_020332	Ank	progressive ankylosis	protein_coding	NP_065065.3	3045421	.	8922	10733	9222	9548	8730	8160
11733	NM_001110783,NM_001277280,NM_001277281,NM_001277284,NM_001277286,NM_001277289,NM_001310436,NM_001310437,NM_031158,NR_102385,NR_102386,XM_006508989,XM_006508990,XM_006508991,XM_006508992,XM_006508993,XM_006508994,XM_006508995,XM_006508996,XM_006508997,XM_006508998,XM_006508999,XM_006509000,XM_006509001,XM_006509002,XM_006509003,XM_030243250,XM_030243251,XR_378776	Ank1	ankyrin 1, erythroid	protein_coding	NP_001104253.1;NP_001264209.1;NP_001264210.1;NP_001264213.1;NP_001264215.1;NP_001264218.1;NP_001297365.1;NP_001297366.1;NP_112435.2;XP_006509052.1;XP_006509053.1;XP_006509054.1;XP_006509055.1;XP_006509056.1;XP_006509057.1;XP_006509058.1;XP_006509059.1;XP_006509060.1;XP_006509061.1;XP_006509062.1;XP_006509063.1;XP_006509064.1;XP_006509065.1;XP_006509066.1;XP_030099110.1;XP_030099111.1	88024	.	1409	1070	1661	1192	1524	1198
11735	NM_009670,NM_146005,NM_170687,NM_170688,NM_170689,NM_170690,NM_170728,NM_170729,NM_170730,XM_006513122,XM_006513124,XM_006513125,XM_006513126,XM_006513127,XM_006513128,XM_006513129,XM_006513130,XM_006513133,XM_006513134,XM_006513135,XM_006513136,XM_006513137,XM_006513138,XM_006513139,XM_011243290,XM_011243291,XM_011243292,XM_011243293,XM_011243295,XM_011243297,XM_011243299,XM_011243300,XM_0112433…	Ank3	ankyrin 3, epithelial	protein_coding	NP_033800.2;NP_666117.2;NP_733788.2;NP_733789.1;NP_733790.2;NP_733791.2;NP_733924.2;NP_733925.2;NP_733926.2;XP_006513185.1;XP_006513187.1;XP_006513188.1;XP_006513189.1;XP_006513190.1;XP_006513191.1;XP_006513192.1;XP_006513193.1;XP_006513196.1;XP_006513197.1;XP_006513198.1;XP_006513199.1;XP_006513200.1;XP_006513201.1;XP_006513202.1;XP_011241592.1;XP_011241593.1;XP_011241594.1;XP_011241595.1;XP_011…	88026	.	15078	15603	16978	14921	12946	12921
11736	NM_009671,XM_030245483,XM_030245484	Ankfy1	ankyrin repeat and FYVE domain containing 1	protein_coding	NP_033801.4;XP_030101343.1;XP_030101344.1	1337008	.	2432	2937	2647	2530	2382	2451
11737	NM_009672,XM_006510778,XM_006510779	Anp32a	acidic (leucine-rich) nuclear phosphoprotein 32 family, member A	protein_coding	NP_033802.2;XP_006510841.1;XP_006510842.1	108447	.	6754	8165	7213	7941	7490	7155
11739	NM_007450	Slc25a4	solute carrier family 25 (mitochondrial carrier, adenine nucleotide translocator), member 4	protein_coding	NP_031476.3	1353495	.	22185	23655	23810	23605	23341	19981
11740	NM_007451	Slc25a5	solute carrier family 25 (mitochondrial carrier, adenine nucleotide translocator), member 5	protein_coding	NP_031477.1	1353496	.	9518	9414	9327	9497	9201	7913
11744	NM_013469,XM_006518451	Anxa11	annexin A11	protein_coding	NP_038497.2;XP_006518514.1	108481	.	2601	2987	2973	2787	2173	1444
11745	NM_013470	Anxa3	annexin A3	protein_coding	NP_038498.2	1201378	.	321	579	365	399	342	488
11746	NM_001331120,NM_013471,XM_006505397,XM_006505398,XM_011241158,XM_030255115	Anxa4	annexin A4	protein_coding	NP_001318049.1;NP_038499.2;XP_006505460.1;XP_006505461.1;XP_011239460.1;XP_030110975.1	88030	.	189	295	141	162	145	212
11747	NM_009673	Anxa5	annexin A5	protein_coding	NP_033803.1	106008	.	1706	3058	1835	2049	1786	2594
11749	NM_001110211,NM_013472,NR_138556	Anxa6	annexin A6	protein_coding	NP_001103681.1;NP_038500.2	88255	.	4720	5574	5266	5503	4612	3783
11750	NM_001110794,NM_001374757,NM_009674,XM_006518452	Anxa7	annexin A7	protein_coding	NP_001104264.1;NP_001361686.1;NP_033804.2;XP_006518515.1	88031	.	3751	3893	3863	3975	4029	2938
11752	NM_001281845,NM_013473	Anxa8	annexin A8	protein_coding	NP_001268774.1;NP_038501.2	1201374	.	91	146	71	78	92	119
11754	NM_009675,XM_006532041,XM_017314230	Aoc3	amine oxidase, copper containing 3	protein_coding	NP_033805.1;XP_006532104.1;XP_017169719.1	1306797	.	11	8	20	24	12	8
11757	NM_007452	Prdx3	peroxiredoxin 3	protein_coding	NP_031478.1	88034	.	1951	2192	2181	2155	2169	1953
11758	NM_001303408,NM_007453,NR_130150,XM_030243163	Prdx6	peroxiredoxin 6	protein_coding	NP_001290337.1;NP_031479.1;XP_030099023.1	894320	.	8047	15567	8948	10835	8422	11999
11761	NM_009676,XM_006495630	Aox1	aldehyde oxidase 1	protein_coding	NP_033806.2;XP_006495693.1	88035	.	220	216	169	193	151	227
11764	NM_001243043,NM_001243044,NM_001355659,NM_001355660,NM_007454,XM_006514462,XM_030245485,XM_030245486,XM_030245487,XM_030245488,XM_030245489	Ap1b1	adaptor protein complex AP-1, beta 1 subunit	protein_coding	NP_001229972.1;NP_001229973.1;NP_001342588.1;NP_001342589.1;NP_031480.2;XP_006514525.1;XP_030101345.1;XP_030101346.1;XP_030101347.1;XP_030101348.1;XP_030101349.1	1096368	.	6834	6847	8159	7320	7727	6502
11765	NM_001301211,NM_009677	Ap1g1	adaptor protein complex AP-1, gamma 1 subunit	protein_coding	NP_001288140.1;NP_033807.2	101919	.	5643	5770	5665	5531	5458	5047
11766	NM_001303502,NM_007455	Ap1g2	adaptor protein complex AP-1, gamma 2 subunit	protein_coding	NP_001290431.1;NP_031481.2	1328307	.	31	31	35	29	43	31
11767	NM_007456,XM_006509538,XM_030243252	Ap1m1	adaptor-related protein complex AP-1, mu subunit 1	protein_coding	NP_031482.1;XP_006509601.1;XP_030099112.1	102776	.	2042	2189	2235	2164	2075	2054
11768	NM_001110300,NM_009678,XM_006509949,XM_006509950	Ap1m2	adaptor protein complex AP-1, mu 2 subunit	protein_coding	NP_001103770.1;NP_033808.2;XP_006510012.1;XP_006510013.1	1336974	.	0	0	4	3	0	0
11769	NM_007457,XM_006504348	Ap1s1	adaptor protein complex AP-1, sigma 1	protein_coding	NP_031483.1;XP_006504411.1	1098244	.	6209	6924	6398	7321	7545	5983
11770	NM_024406,XM_006530048	Fabp4	fatty acid binding protein 4, adipocyte	protein_coding	NP_077717.1;XP_006530111.1	88038	.	0	0	0	0	0	0
11771	NM_001077264,NM_007458,XM_006540569,XM_006540570	Ap2a1	adaptor-related protein complex 2, alpha 1 subunit	protein_coding	NP_001070732.1;NP_031484.1;XP_006540632.1;XP_006540633.1	101921	.	10982	11043	12707	11546	10685	8757
11772	NM_001357068,NM_007459,XM_006536155	Ap2a2	adaptor-related protein complex 2, alpha 2 subunit	protein_coding	NP_001343997.1;NP_031485.3;XP_006536218.1	101920	.	13576	14361	14194	14906	14092	10834
11773	NM_001302970,NM_009679	Ap2m1	adaptor-related protein complex 2, mu 1 subunit	protein_coding	NP_001289899.1;NP_033809.1	1298405	.	18705	19378	19800	20698	20250	16028
11774	NM_009680,XM_006517523,XR_001780749,XR_382728	Ap3b1	adaptor-related protein complex 3, beta 1 subunit	protein_coding	NP_033810.2;XP_006517586.1	1333879	.	2564	2631	2654	2572	2212	2117
11775	NM_021492,XM_006540571	Ap3b2	adaptor-related protein complex 3, beta 2 subunit	protein_coding	NP_067467.2;XP_006540634.1	1100869	.	6333	5844	6626	6456	6681	5381
11776	NM_007460,XM_030244850,XR_003948582	Ap3d1	adaptor-related protein complex 3, delta 1 subunit	protein_coding	NP_031486.1;XP_030100710.1	107734	.	7345	7106	7663	7552	7459	5830
11777	NM_001303015,NM_009681,XM_006525526,XM_006525528	Ap3s1	adaptor-related protein complex 3, sigma 1 subunit	protein_coding	NP_001289944.1;NP_033811.1;XP_006525589.1;XP_006525591.1	1337062	.	1713	1564	1585	1502	1651	1354
11778	NM_009682	Ap3s2	adaptor-related protein complex 3, sigma 2 subunit	protein_coding	NP_033812.3	1337060	.	3248	3650	3630	3590	3634	3068
11781	NM_021392,XM_006504551,XM_030254076,XM_030254077	Ap4m1	adaptor-related protein complex AP-4, mu 1	protein_coding	NP_067367.3;XP_006504614.1;XP_030109936.1;XP_030109937.1	1337063	.	406	463	424	432	445	380
11782	NM_001329698,NM_001329699,NM_021710,XM_006515433,XM_006515434	Ap4s1	adaptor-related protein complex AP-4, sigma 1	protein_coding	NP_001316627.1;NP_001316628.1;NP_068356.1;XP_006515496.1;XP_006515497.1	1337065	.	990	989	1090	1040	1070	817
11783	NM_001042558,NM_001282947,NM_009684	Apaf1	apoptotic peptidase activating factor 1	protein_coding	NP_001036023.1;NP_001269876.1;NP_033814.2	1306796	.	637	792	701	837	737	755
11784	NM_001291166,NM_001291167,NM_007461,XM_006540573,XM_006540576,XM_017321945,XM_030242006,XM_030242007,XM_030242008,XM_030242009,XM_030242010,XM_030242011,XM_030242012,XM_030242013,XM_030242014	Apba2	amyloid beta (A4) precursor protein-binding, family A, member 2	protein_coding	NP_001278095.1;NP_001278096.1;NP_031487.1;XP_006540636.1;XP_006540639.1;XP_017177434.1;XP_030097866.1;XP_030097867.1;XP_030097868.1;XP_030097869.1;XP_030097870.1;XP_030097871.1;XP_030097872.1;XP_030097873.1;XP_030097874.1	1261791	.	9316	9160	9964	10003	9476	7380
11785	NM_001253885,NM_001253886,NM_001253887,NM_001310600,NM_009685,XM_006507230,XM_006507231,XM_006507232,XM_006507234,XM_006507235,XM_006507236,XM_017321946,XM_017321947	Apbb1	amyloid beta (A4) precursor protein-binding, family B, member 1	protein_coding	NP_001240814.1;NP_001240815.1;NP_001240816.1;NP_001297529.1;NP_033815.1;XP_006507293.1;XP_006507294.1;XP_006507295.1;XP_006507297.1;XP_006507298.1;XP_006507299.1;XP_017177435.1;XP_017177436.1	107765	.	15366	15688	17429	16478	16086	12920
11787	NM_001201413,NM_001201414,NM_001201415,NM_001201416,NM_001310626,NM_009686,XM_006503688,XM_006503690,XM_006503691,XM_006503692,XM_006503693,XM_006503694,XM_006503696,XM_006503697,XM_011240693,XM_017320620,XM_017320622,XM_030254078,XM_030254079,XM_030254080,XM_030254081,XM_030254082,XM_030254083	Apbb2	amyloid beta (A4) precursor protein-binding, family B, member 2	protein_coding	NP_001188342.1;NP_001188343.1;NP_001188344.1;NP_001188345.1;NP_001297555.1;NP_033816.1;XP_006503751.1;XP_006503753.1;XP_006503754.1;XP_006503755.1;XP_006503756.1;XP_006503757.1;XP_006503759.1;XP_006503760.1;XP_011238995.1;XP_017176109.1;XP_017176111.1;XP_030109938.1;XP_030109939.1;XP_030109940.1;XP_030109941.1;XP_030109942.1;XP_030109943.1	108405	.	2311	2316	2443	2174	2015	1786
11789	NM_001360979,NM_001360980,NM_007462,XM_006525529,XM_006525530,XM_006525532,XM_006525533,XM_006525534,XM_006525536,XM_006525538,XM_006525539,XM_030250277,XM_030250278,XM_030250279,XM_030250280,XM_030250281,XM_030250282,XM_030250283,XM_030250284,XM_030250285,XM_030250286,XM_030250287,XM_030250288,XM_030250289,XM_030250290,XM_030250291,XM_030250292,XM_030250293,XM_030250294,XM_030250295,XM_030250296	Apc	APC, WNT signaling pathway regulator	protein_coding	NP_001347908.1;NP_001347909.1;NP_031488.2;XP_006525592.1;XP_006525593.1;XP_006525595.1;XP_006525596.1;XP_006525597.1;XP_006525599.1;XP_006525601.1;XP_006525602.1;XP_030106137.1;XP_030106138.1;XP_030106139.1;XP_030106140.1;XP_030106141.1;XP_030106142.1;XP_030106143.1;XP_030106144.1;XP_030106145.1;XP_030106146.1;XP_030106147.1;XP_030106148.1;XP_030106149.1;XP_030106150.1;XP_030106151.1;XP_030106152…	88039	.	12938	14644	13293	13250	11498	12017
11790	NM_001085370,NM_001085371,NM_001173477,NM_007463,XM_006496401,XM_006496402,XM_006496403,XM_006496404,XM_011238643,XM_011238644,XM_011238645,XM_011238646,XM_011238647,XM_011238648,XM_011238649,XM_011238651,XM_017312276,XM_017322354,XM_017322375,XM_030243202,XM_030243273,XM_030243284,XM_030243348,XM_030243368,XM_030243390,XM_030243402,XM_030243447,XM_030243476,XM_030243494,XM_030243512,XM_030243521…	Speg	SPEG complex locus	protein_coding	NP_001078839.1;NP_001078840.1;NP_001166948.1;NP_031489.4;XP_006496464.1;XP_006496465.1;XP_006496466.1;XP_006496467.1;XP_011236945.1;XP_011236946.1;XP_011236947.1;XP_011236948.1;XP_011236949.1;XP_011236950.1;XP_011236951.1;XP_011236953.1;XP_017167765.1;XP_017177843.1;XP_017177864.1;XP_030099062.1;XP_030099133.1;XP_030099144.1;XP_030099208.1;XP_030099228.1;XP_030099250.1;XP_030099262.1;XP_030099307…	109282	.	4267	3767	5323	4384	4046	3364
11792	NM_009687	Apex1	apurinic/apyrimidinic endonuclease 1	protein_coding	NP_033817.1	88042	.	1258	1461	1386	1551	1417	1182
11793	NM_001314013,NM_001358596,NM_053069,XM_011243108,XM_017313783	Atg5	autophagy related 5	protein_coding	NP_001300942.1;NP_001345525.1;NP_444299.1;XP_011241410.1;XP_017169272.1	1277186	.	901	992	939	1039	967	892
11796	NM_007464,XM_006509828,XM_006509829,XM_006509830,XM_006509831,XM_011242352,XM_011242353	Birc3	baculoviral IAP repeat-containing 3	protein_coding	NP_031490.2;XP_006509891.1;XP_006509892.1;XP_006509893.1;XP_006509894.1;XP_011240654.1;XP_011240655.1	1197007	.	38	72	39	62	38	71
11797	NM_001291503,NM_007465,XM_017313110,XM_017313111,XM_030244029,XR_003947764	Birc2	baculoviral IAP repeat-containing 2	protein_coding	NP_001278432.1;NP_031491.2;XP_017168599.1;XP_017168600.1;XP_030099889.1	1197009	.	1109	1262	1121	1130	1185	1237
11798	NM_001301639,NM_001301641,NM_009688,NR_125870,XM_006541425,XM_006541427,XM_011250976,XM_011250977,XM_017318359,XM_017318360,XM_017318361,XM_017318362,XM_030251200,XM_030251201,XM_030251202,XM_030251203	Xiap	X-linked inhibitor of apoptosis	protein_coding	NP_001288568.1;NP_001288570.1;NP_033818.2;XP_006541488.1;XP_006541490.1;XP_011249278.1;XP_011249279.1;XP_017173848.1;XP_017173849.1;XP_017173850.1;XP_017173851.1;XP_030107060.1;XP_030107061.1;XP_030107062.1;XP_030107063.1	107572	.	3343	3332	3393	3295	2944	3488
11799	NM_001012273,NM_009689	Birc5	baculoviral IAP repeat-containing 5	protein_coding	NP_001012273.1;NP_033819.1	1203517	.	14	18	16	21	17	11
11800	NM_001305258,NM_001349003,NM_007466	Api5	apoptosis inhibitor 5	protein_coding	NP_001292187.1;NP_001335932.1;NP_031492.2	1888993	.	4718	5182	4948	5059	4670	4410
11801	NM_009690	Cd5l	CD5 antigen-like	protein_coding	NP_033820.2	1334419	.	0	4	0	0	0	0
11803	NM_007467	Aplp1	amyloid beta (A4) precursor-like protein 1	protein_coding	NP_031493.2	88046	.	54172	63084	63763	60650	54273	51933
11804	NM_001102455,NM_001102456,NM_001357698,NM_009691,XM_006509952	Aplp2	amyloid beta (A4) precursor-like protein 2	protein_coding	NP_001095925.1;NP_001095926.1;NP_001344627.1;NP_033821.1;XP_006510015.1	88047	.	23293	25923	23823	22087	21169	18678
11806	NM_009692	Apoa1	apolipoprotein A-I	protein_coding	NP_033822.2	88049	.	0	0	3	6	7	6
11807	NM_001305549,NM_001305550,NM_001305585,NM_013474,NR_131173	Apoa2	apolipoprotein A-II	protein_coding	NP_001292478.1;NP_001292479.1;NP_001292514.1;NP_038502.2	88050	.	16	13	8	7	14	10
11808	NM_007468	Apoa4	apolipoprotein A-IV	protein_coding	NP_031494.2	88051	.	0	0	0	0	0	0
11810	NM_001134391,NM_031159,XM_006505401,XM_011241159	Apobec1	apolipoprotein B mRNA editing enzyme, catalytic polypeptide 1	protein_coding	NP_001127863.1;NP_112436.1;XP_006505464.1;XP_011239461.1	103298	.	66	140	58	82	67	73
11811	NM_009694	Apobec2	apolipoprotein B mRNA editing enzyme, catalytic polypeptide 2	protein_coding	NP_033824.1	1343178	.	6	7	6	9	0	7
11812	NM_001110009,NM_007469	Apoc1	apolipoprotein C-I	protein_coding	NP_001103479.1;NP_031495.1	88053	.	25	50	37	37	44	80
11813	NM_001277944,NM_001309795	Apoc2	apolipoprotein C-II	protein_coding	NP_001264873.1;NP_001296724.1	88054	.	0	0	0	0	3	0
11814	NM_001289755,NM_001289756,NM_001289833,NM_023114	Apoc3	apolipoprotein C-III	protein_coding	NP_001276684.1;NP_001276685.1;NP_001276762.1;NP_075603.1	88055	.	0	10	8	8	16	4
11815	NM_001301353,NM_001301354,NM_007470	Apod	apolipoprotein D	protein_coding	NP_001288282.1;NP_001288283.1;NP_031496.2	88056	.	6362	12927	8484	7817	4918	8983
11816	NM_001305819,NM_001305843,NM_001305844,NM_009696,XM_030242015	Apoe	apolipoprotein E	protein_coding	NP_001292748.1;NP_001292772.1;NP_001292773.1;NP_033826.2;XP_030097875.1	88057	.	44888	80362	54898	62766	47249	82306
11818	NM_013475,XM_006532042	Apoh	apolipoprotein H	protein_coding	NP_038503.4;XP_006532105.1	88058	.	19	14	22	13	17	14
11819	NM_009697,NM_183261,XM_006540577,XM_006540578	Nr2f2	nuclear receptor subfamily 2, group F, member 2	protein_coding	NP_033827.2;NP_899084.2;XP_006540640.1;XP_006540641.1	1352452	.	612	403	313	405	773	1166
11820	NM_001198823,NM_001198824,NM_001198825,NM_001198826,NM_007471,XM_006522873,XM_006522874	App	amyloid beta (A4) precursor protein	protein_coding	NP_001185752.1;NP_001185753.1;NP_001185754.1;NP_001185755.1;NP_031497.2;XP_006522936.1;XP_006522937.1	88059	.	84040	84025	88679	82527	78865	75892
11821	NM_009698	Aprt	adenine phosphoribosyl transferase	protein_coding	NP_033828.2	88061	.	828	920	860	945	931	752
11826	NM_007472	Aqp1	aquaporin 1	protein_coding	NP_031498.1	103201	.	720	10	9	10	68	31
11827	NM_009699	Aqp2	aquaporin 2	protein_coding	NP_033829.3	1096865	.	0	0	3	0	0	0
11828	NM_016689	Aqp3	aquaporin 3	protein_coding	NP_057898.2	1333777	.	3	0	0	0	0	0
11829	NM_001308641,NM_001308642,NM_001308643,NM_001308644,NM_001308645,NM_001308646,NM_001308647,NM_001317729,NM_009700	Aqp4	aquaporin 4	protein_coding	NP_001295570.1;NP_001295571.1;NP_001295572.1;NP_001295573.1;NP_001295574.1;NP_001295575.1;NP_001295576.1;NP_001304658.1;NP_033830.2	107387	.	7000	12379	7748	9048	5901	9355
11830	NM_009701	Aqp5	aquaporin 5	protein_coding	NP_033831.1	106215	.	0	0	6	0	2	7
11831	NM_175087,XM_006520350	Aqp6	aquaporin 6	protein_coding	NP_780296.1;XP_006520413.1	1341204	.	3	0	2	2	0	5
11832	NM_001378638,NM_001378639,NM_001378640,NM_001378641,NM_001378642,NM_007473,XM_006537559,XM_006537560,XM_006537561,XM_006537563,XM_017319925,XM_030253099,XM_030253101	Aqp7	aquaporin 7	protein_coding	NP_001365567.1;NP_001365568.1;NP_001365569.1;NP_001365570.1;NP_001365571.1;NP_031499.1;XP_006537622.2;XP_006537623.2;XP_006537624.4;XP_006537626.1;XP_017175414.1;XP_030108959.1;XP_030108961.1	1314647	.	0	0	0	0	0	0
11833	NM_001109045,NM_007474	Aqp8	aquaporin 8	protein_coding	NP_001102515.1;NP_031500.1	1195271	.	0	0	0	0	0	0
11834	NM_001290788,NM_009702	Aqr	aquarius	protein_coding	NP_001277717.1;NP_033832.2	1276102	.	1837	1931	1949	1770	1669	1736
11835	NM_013476	Ar	androgen receptor	protein_coding	NP_038504.1	88064	.	1510	1243	1569	1388	1515	1721
11836	NM_001159645,NM_009703,XM_006527556,XM_006527557,XM_011247429,XM_030251204,XR_003952995	Araf	Araf proto-oncogene, serine/threonine kinase	protein_coding	NP_001153117.1;NP_033833.1;XP_006527619.1;XP_006527620.1;XP_011245731.2;XP_030107064.1	88065	.	3984	3961	4135	4310	4144	4147
11837	NM_007475	Rplp0	ribosomal protein, large, P0	protein_coding	NP_031501.1	1927636	.	7644	10104	8568	8970	7941	7924
11838	NM_001276684,NM_018790	Arc	activity regulated cytoskeletal-associated protein	protein_coding	NP_001263613.1;NP_061260.1	88067	.	10984	7044	12544	9464	10644	8815
11839	NM_009704	Areg	amphiregulin	protein_coding	NP_033834.1	88068	.	2	7	0	6	5	10
11840	NM_001130408,NM_007476	Arf1	ADP-ribosylation factor 1	protein_coding	NP_001123880.1;NP_031502.1	99431	.	19133	18744	20974	20315	20427	17425
11841	NM_001304574,NM_007477	Arf2	ADP-ribosylation factor 2	protein_coding	NP_001291503.1;NP_031503.1	99595	.	1811	1890	1869	1876	1876	1768
11842	NM_001355510,NM_007478	Arf3	ADP-ribosylation factor 3	protein_coding	NP_001342439.1;NP_031504.1	99432	.	59862	60274	69739	68188	65416	56825
11843	NM_007479	Arf4	ADP-ribosylation factor 4	protein_coding	NP_031505.1	99433	.	4301	4259	4299	4109	4054	4135
11844	NM_007480	Arf5	ADP-ribosylation factor 5	protein_coding	NP_031506.1	99434	.	3295	3440	3864	3874	3565	2856
11845	NM_007481	Arf6	ADP-ribosylation factor 6	protein_coding	NP_031507.1	99435	.	1840	1946	1864	1772	1701	1788
11846	NM_007482	Arg1	arginase, liver	protein_coding	NP_031508.1	88070	.	0	0	0	0	3	4
11847	NM_009705	Arg2	arginase type II	protein_coding	NP_033835.1	1330806	.	136	87	131	94	75	34
11848	NM_001313961,NM_001313962,NM_016802	Rhoa	ras homolog family member A	protein_coding	NP_001300890.1;NP_001300891.1;NP_058082.2	1096342	.	5558	7217	6040	6432	5692	6514
11849	gene-Rhoay-ps1	Rhoay-ps1	ras homolog A translocated to the Y, pseudogene 1	pseudogene	.	1314639	.	0	0	0	0	0	0
11850	gene-Rhoay-ps2	Rhoay-ps2	ras homolog A translocated to the Y, pseudogene 2	pseudogene	.	1314636	.	0	0	0	0	0	0
11851	gene-Rhoay-ps3	Rhoay-ps3	ras homolog A translocated to the Y, pseudogene 3	pseudogene	.	1314637	.	0	0	0	0	0	0
11852	NM_007483	Rhob	ras homolog family member B	protein_coding	NP_031509.1	107949	.	11131	14775	13623	13035	10731	10212
11853	NM_001291859,NM_007484	Rhoc	ras homolog family member C	protein_coding	NP_001278788.1;NP_031510.2	106028	.	283	446	330	307	253	408
11854	NM_001329989,NM_007485,XM_006531644	Rhod	ras homolog family member D	protein_coding	NP_001316918.1;NP_031511.1;XP_006531707.1	108446	.	35	32	15	31	24	28
11855	NM_009706,XM_006515438,XM_006515439,XM_011243989,XM_011243990	Arhgap5	Rho GTPase activating protein 5	protein_coding	NP_033836.2;XP_006515501.1;XP_006515502.1;XP_011242291.1;XP_011242292.1	1332637	.	7065	8898	6849	7358	5612	7908
11856	NM_001287530,NM_009707,NM_178754,NR_109847,XM_006528694,XM_011247783,XR_003952996	Arhgap6	Rho GTPase activating protein 6	protein_coding	NP_001274459.1;NP_033837.2;NP_848869.1;XP_006528757.1;XP_011246085.1	1196332	.	41	54	30	52	80	111
11857	NM_001301301,NM_001301303,NM_001301305,NM_001301308,NM_001301309,NM_007486,XM_006505404,XM_030255117,XM_030255118	Arhgdib	Rho, GDP dissociation inhibitor (GDI) beta	protein_coding	NP_001288230.1;NP_001288232.1;NP_001288234.1;NP_001288237.1;NP_001288238.1;NP_031512.1;XP_006505467.1;XP_030110977.1;XP_030110978.1	101940	.	173	350	221	233	151	289
11858	NM_009708	Rnd2	Rho family GTPase 2	protein_coding	NP_033838.1	1338755	.	1614	2059	1819	1896	2131	2223
11859	NM_008887	Phox2a	paired-like homeobox 2a	protein_coding	NP_032913.1	106633	.	0	0	0	0	0	0
11861	NM_001039515,NM_007487	Arl4a	ADP-ribosylation factor-like 4A	protein_coding	NP_001034604.1;NP_031513.1	99437	.	1286	1121	1063	1030	1071	1224
11863	NM_001037737,NM_009709,XM_006500930,XM_006500931,XM_006500933,XM_030252391,XM_030252392,XM_030252393,XR_001783643,XR_001783644	Arnt	aryl hydrocarbon receptor nuclear translocator	protein_coding	NP_001032826.1;NP_033839.2;XP_006500993.1;XP_006500994.1;XP_006500996.1;XP_030108251.1;XP_030108252.1;XP_030108253.1	88071	.	852	969	861	797	791	746
11864	NM_007488,XM_006507238,XM_006507239,XM_006507240,XM_006507242,XM_006507243,XM_006507244,XM_011241655,XM_030242017	Arnt2	aryl hydrocarbon receptor nuclear translocator 2	protein_coding	NP_031514.3;XP_006507301.1;XP_006507302.1;XP_006507303.1;XP_006507305.1;XP_006507306.1;XP_006507307.1;XP_011239957.1;XP_030097877.1	107188	.	9381	9935	10282	10086	10507	12049
11865	NM_001243048,NM_001357070,NM_001368412,NM_001374642,NM_007489,XM_006507245,XM_006507246,XM_006507247,XM_006507248,XM_006507249,XM_006507252,XM_006507253,XM_011241656,XM_017321950,XM_030242018,XM_030242019,XM_030242020,XM_030242021,XM_030242022,XR_001785467,XR_003946377	Arntl	aryl hydrocarbon receptor nuclear translocator-like	protein_coding	NP_001229977.1;NP_001343999.1;NP_001355341.1;NP_001361571.1;NP_031515.1;XP_006507308.1;XP_006507309.1;XP_006507310.1;XP_006507311.1;XP_006507312.1;XP_006507315.1;XP_006507316.1;XP_011239958.1;XP_017177439.1;XP_030097878.1;XP_030097879.1;XP_030097880.1;XP_030097881.1;XP_030097882.1	1096381	.	1184	1188	1269	1374	1162	1032
11867	NM_023142	Arpc1b	actin related protein 2/3 complex, subunit 1B	protein_coding	NP_075631.2	1343142	.	519	822	607	647	487	677
11870	NM_009710,XM_011241657,XR_869649	Art1	ADP-ribosyltransferase 1	protein_coding	NP_033840.2;XP_011239959.1	107511	.	0	0	0	0	0	0
11871	NR_033804	Art2a	ADP-ribosyltransferase 2a	transcribed_pseudogene	.	107546	.	0	0	0	0	0	0
11872	NM_019915,XM_006507256,XM_017321951	Art2b	ADP-ribosyltransferase 2b	protein_coding	NP_064299.2;XP_006507319.1;XP_017177440.1	107545	.	0	0	0	0	0	2
11875	NM_001291354,NM_007491,NR_111935,XM_006507258,XM_006507259,XM_006507260,XM_006507261,XM_006507262,XM_006507263,XM_030242023,XM_030242024,XM_030242025	Art5	ADP-ribosyltransferase 5	protein_coding	NP_001278283.1;NP_031517.2;XP_006507321.1;XP_006507322.1;XP_006507323.1;XP_006507324.1;XP_006507325.1;XP_006507326.1;XP_030097883.1;XP_030097884.1;XP_030097885.1	107948	.	0	0	0	0	3	0
11876	NM_001284191,NM_001284192,NM_001284193,NM_009711,XM_006502690,XM_006502691,XM_006502692,XM_006502693,XM_006502694,XM_011240419,XM_030253105	Artn	artemin	protein_coding	NP_001271120.1;NP_001271121.1;NP_001271122.1;NP_033841.1;XP_006502753.1;XP_006502754.1;XP_006502755.1;XP_006502756.1;XP_006502757.1;XP_011238721.1;XP_030108965.1	1333791	.	6	11	15	8	11	7
11877	NM_001272028,NM_001272029,NM_001272030,NM_001272031,NM_001272032,NM_033474,XM_011245807,XM_017316854,XM_030248935,XR_001781781,XR_001781782	Arvcf	armadillo repeat gene deleted in velocardiofacial syndrome	protein_coding	NP_001258957.1;NP_001258958.1;NP_001258959.1;NP_001258960.1;NP_001258961.1;NP_258435.2;XP_011244109.1;XP_017172343.1;XP_030104795.1	109620	.	1207	1425	1360	1339	1201	1059
11878	NM_001305940,NM_007492	Arx	aristaless related homeobox	protein_coding	NP_001292869.1;NP_031518.2	1097716	.	341	385	421	327	460	421
11881	NM_009712	Arsb	arylsulfatase B	protein_coding	NP_033842.3	88075	.	7370	8586	7485	7969	6709	6201
11883	NM_009713	Arsa	arylsulfatase A	protein_coding	NP_033843.2	88077	.	1120	1317	1305	1184	1202	1193
11886	NM_019734,XM_017312527,XM_017312528,XM_017312530,XM_017312531,XM_017312532,XM_017312533,XM_017312534,XM_017312535,XM_017312536,XM_030243253,XM_030243254,XM_030243255,XM_030243256	Asah1	N-acylsphingosine amidohydrolase 1	protein_coding	NP_062708.1;XP_017168016.1;XP_017168017.1;XP_017168019.1;XP_017168020.1;XP_017168021.1;XP_017168022.1;XP_017168023.1;XP_017168024.1;XP_017168025.1;XP_030099113.1;XP_030099114.1;XP_030099115.1;XP_030099116.1	1277124	.	1546	2025	1385	1698	1515	1640
11889	NM_001291131,NM_001291132,NM_009714,XM_017314231	Asgr1	asialoglycoprotein receptor 1	protein_coding	NP_001278060.1;NP_001278061.1;NP_033844.1;XP_017169720.1	88081	.	6	7	8	7	4	9
11890	NM_001313925,NM_001313926,NM_001313927,NM_007493	Asgr2	asialoglycoprotein receptor 2	protein_coding	NP_001300854.1;NP_001300855.1;NP_001300856.1;NP_031519.1	88082	.	0	0	0	0	3	0
11891	NM_001301230,NM_001301232,NM_023635,XM_006510780	Rab27a	RAB27A, member RAS oncogene family	protein_coding	NP_001288159.1;NP_001288161.1;NP_076124.1;XP_006510843.1	1861441	.	250	324	275	269	278	285
11898	NM_007494	Ass1	argininosuccinate synthetase 1	protein_coding	NP_031520.1	88090	.	995	2174	1185	1558	1098	1812
11899	NM_001205204,NM_007495,XM_011238739,XM_011238740	Astn1	astrotactin 1	protein_coding	NP_001192133.1;NP_031521.2;XP_011237041.1;XP_011237042.1	1098567	.	13235	12411	13909	13317	12853	11902
11905	NM_001379302,NM_080844,XM_006496626,XM_030243696	Serpinc1	serine (or cysteine) peptidase inhibitor, clade C (antithrombin), member 1	protein_coding	NP_001366231.1;NP_543120.1;XP_006496689.1;XP_030099556.1	88095	.	0	0	0	0	0	0
11906	NM_007496,XM_006530585,XM_006530586,XM_011248284,XM_030243257,XM_030243258	Zfhx3	zinc finger homeobox 3	protein_coding	NP_031522.2;XP_006530648.1;XP_006530649.1;XP_011246586.1;XP_030099117.1;XP_030099118.1	99948	.	84	112	94	115	58	98
11907	NM_001029895,NM_001136054,NM_001271343,NM_013799,XM_006507264,XM_006507265,XM_006507267,XM_011241659,XM_030242026,XM_030242027,XM_030242028	Ate1	arginyltransferase 1	protein_coding	NP_001025066.1;NP_001129526.1;NP_001258272.1;NP_038827.2;XP_006507327.1;XP_006507328.1;XP_006507330.1;XP_011239961.1;XP_030097886.1;XP_030097887.1;XP_030097888.1	1333870	.	3977	4136	3857	3961	3901	3773
11908	NM_007497,XM_006520351,XM_006520352	Atf1	activating transcription factor 1	protein_coding	NP_031523.3;XP_006520414.1;XP_006520415.1	1298366	.	340	385	324	429	384	441
11909	NM_001025093,NM_001284369,NM_001284370,NM_001284371,NM_001284372,NM_001284373,NM_001284374,NM_001284376,NM_009715,XM_030246840,XM_030246841,XM_030246843,XM_030246844,XM_030246846,XM_030246847,XM_030246850,XM_030246853,XM_030246855,XM_030246858,XM_030246867,XM_030246872,XM_030246873	Atf2	activating transcription factor 2	protein_coding	NP_001020264.1;NP_001271298.1;NP_001271299.1;NP_001271300.1;NP_001271301.1;NP_001271302.1;NP_001271303.1;NP_001271305.1;NP_033845.1;XP_030102700.1;XP_030102701.1;XP_030102703.1;XP_030102704.1;XP_030102706.1;XP_030102707.1;XP_030102710.1;XP_030102713.1;XP_030102715.1;XP_030102718.1;XP_030102727.1;XP_030102732.1;XP_030102733.1	109349	.	4766	4514	4873	4790	4699	4366
11910	NM_007498	Atf3	activating transcription factor 3	protein_coding	NP_031524.2	109384	.	109	210	96	148	87	121
11911	NM_001287180,NM_009716	Atf4	activating transcription factor 4	protein_coding	NP_001274109.1;NP_033846.2	88096	.	4314	3840	4876	4597	5136	4246
11920	NM_007499,XM_011242385,XR_003947767,XR_870525	Atm	ataxia telangiectasia mutated	protein_coding	NP_031525.3;XP_011240687.1	107202	.	1109	1187	1179	1026	1109	1182
11921	NM_007500	Atoh1	atonal bHLH transcription factor 1	protein_coding	NP_031526.1	104654	.	2	0	0	0	0	0
11922	NM_009717	Neurod6	neurogenic differentiation 6	protein_coding	NP_033847.1	106593	.	11359	9246	11299	10634	10121	7455
11923	NM_001329489,NM_001329490,NM_007501	Neurod4	neurogenic differentiation 4	protein_coding	NP_001316418.1;NP_001316419.1;NP_031527.1	108055	.	3	0	5	5	3	3
11924	NM_009718,XM_030252394	Neurog2	neurogenin 2	protein_coding	NP_033848.1;XP_030108254.1	109619	.	20	26	21	39	21	51
11925	NM_009719	Neurog3	neurogenin 3	protein_coding	NP_033849.3	893591	.	0	0	0	0	0	0
11927	NM_009720	Atox1	antioxidant 1 copper chaperone	protein_coding	NP_033850.1	1333855	.	842	908	860	872	780	667
11928	NM_144900	Atp1a1	ATPase, Na+/K+ transporting, alpha 1 polypeptide	protein_coding	NP_659149.1	88105	.	30210	33733	31725	30806	28988	27068
11931	NM_009721	Atp1b1	ATPase, Na+/K+ transporting, beta 1 polypeptide	protein_coding	NP_033851.1	88108	.	77116	73528	79269	75422	76622	67404
11932	NM_013415,XM_017314232	Atp1b2	ATPase, Na+/K+ transporting, beta 2 polypeptide	protein_coding	NP_038201.1;XP_017169721.1	88109	.	18128	25899	20361	22197	19111	22991
11933	NM_001357212,NM_001357213,NM_007502,XM_011242658,XM_017313112,XM_030244030,XM_030244031	Atp1b3	ATPase, Na+/K+ transporting, beta 3 polypeptide	protein_coding	NP_001344141.1;NP_001344142.1;NP_031528.1;XP_011240960.1;XP_017168601.1;XP_030099890.1;XP_030099891.1	107788	.	3710	5483	4047	4046	3431	4751
11936	NM_007503,NM_052823,NR_028499,XM_030244032	Fxyd2	FXYD domain-containing ion transport regulator 2	protein_coding	NP_031529.2;NP_439888.1;XP_030099892.1	1195260	.	52	62	49	76	74	55
11937	NM_007504,XM_006507268	Atp2a1	ATPase, Ca++ transporting, cardiac muscle, fast twitch 1	protein_coding	NP_031530.2;XP_006507331.1	105058	.	12	11	10	11	7	17
11938	NM_001110140,NM_009722,NR_027838	Atp2a2	ATPase, Ca++ transporting, cardiac muscle, slow twitch 2	protein_coding	NP_001103610.1;NP_033852.1	88110	.	42901	39994	42224	39255	38559	36099
11941	NM_001036684,NM_001347365,NM_009723,XM_011241161,XM_011241162,XM_011241163,XM_011241165,XM_011241166,XM_011241167,XM_011241168,XM_011241169,XM_011241170,XM_017321353,XM_030255119,XM_030255120,XM_030255121,XM_030255122,XR_001785094,XR_868849,XR_868850	Atp2b2	ATPase, Ca++ transporting, plasma membrane 2	protein_coding	NP_001031761.1;NP_001334294.1;NP_033853.1;XP_011239463.1;XP_011239464.1;XP_011239465.1;XP_011239467.1;XP_011239468.1;XP_011239469.1;XP_011239470.1;XP_011239471.1;XP_011239472.1;XP_017176842.1;XP_030110979.1;XP_030110980.1;XP_030110981.1;XP_030110982.1	105368	.	20860	17748	23660	19980	17188	12917
11944	NM_001290627,NM_018731	Atp4a	ATPase, H+/K+ exchanging, gastric, alpha polypeptide	protein_coding	NP_001277556.1;NP_061201.2	88113	.	6	13	17	22	24	21
11945	NM_009724	Atp4b	ATPase, H+/K+ exchanging, beta polypeptide	protein_coding	NP_033854.1	88114	.	0	0	0	0	0	0
11946	NM_007505	Atp5a1	ATP synthase, H+ transporting, mitochondrial F1 complex, alpha subunit 1	protein_coding	NP_031531.1	88115	.	37799	40122	39266	40407	39713	36162
11947	NM_016774	Atp5b	ATP synthase, H+ transporting mitochondrial F1 complex, beta subunit	protein_coding	NP_058054.2	107801	.	44117	46415	46466	47530	47861	40617
11949	NM_001112738,NM_001374641,NM_020615	Atp5c1	ATP synthase, H+ transporting, mitochondrial F1 complex, gamma polypeptide 1	protein_coding	NP_001106209.1;NP_001361570.1;NP_065640.2	1261437	.	8032	8665	7631	8388	8570	7738
11950	NM_001304719,NM_009725	Atp5pb	ATP synthase peripheral stalk-membrane subunit b	protein_coding	NP_001291648.1;NP_033855.2	1100495	.	8847	9107	9217	9299	9685	8185
11951	NM_001161419,NM_007506,XM_030245490	Atp5g1	ATP synthase, H+ transporting, mitochondrial F0 complex, subunit C1 (subunit 9)	protein_coding	NP_001154891.1;NP_031532.2;XP_030101350.1	107653	.	4593	4677	4676	4872	4849	3943
11957	NM_001302213,NM_001302214,NM_001302215,NM_001302216,NM_001358499,NM_001358500,NM_016755,XM_011246092,XM_030248936,XM_030248937,XM_030248938	Atp5j	ATP synthase, H+ transporting, mitochondrial F0 complex, subunit F	protein_coding	NP_001289142.1;NP_001289143.1;NP_001289144.1;NP_001289145.1;NP_001345428.1;NP_001345429.1;NP_058035.1;XP_011244394.1;XP_030104796.1;XP_030104797.1;XP_030104798.1	107777	.	4309	4525	4066	4310	4385	4568
11958	NM_007507,NR_154996	Atp5k	ATP synthase, H+ transporting, mitochondrial F1F0 complex, subunit E	protein_coding	NP_031533.2	106636	.	2593	2437	2218	2503	2534	2580
11964	NM_001358203,NM_001358204,NM_007508,XM_006521721	Atp6v1a	ATPase, H+ transporting, lysosomal V1 subunit A	protein_coding	NP_001345132.1;NP_001345133.1;NP_031534.2;XP_006521784.1	1201780	.	33353	34854	32204	34685	32596	28215
11966	NM_007509	Atp6v1b2	ATPase, H+ transporting, lysosomal V1 subunit B2	protein_coding	NP_031535.2	109618	.	28484	29625	29964	31408	31784	26814
11972	NM_013477	Atp6v0d1	ATPase, H+ transporting, lysosomal V0 subunit D1	protein_coding	NP_038505.2	1201778	.	9565	9895	9993	10335	10029	7208
11973	NM_007510	Atp6v1e1	ATPase, H+ transporting, lysosomal V1 subunit E1	protein_coding	NP_031536.2	894326	.	12450	12571	12328	13060	13388	10962
11974	NM_025272	Atp6v0e	ATPase, H+ transporting, lysosomal V0 subunit E	protein_coding	NP_079548.1	1328318	.	549	693	554	562	540	600
11975	NM_001243049,NM_001243050,NM_001243051,NM_001362636,NM_001362637,NM_001362638,NM_001362639,NM_001362640,NM_001362641,NM_016920,XM_006532049,XM_006532050,XM_006532051,XM_006532054,XM_006532055,XM_030245491,XM_030245492,XR_388335,XR_388336	Atp6v0a1	ATPase, H+ transporting, lysosomal V0 subunit A1	protein_coding	NP_001229978.1;NP_001229979.1;NP_001229980.1;NP_001349565.1;NP_001349566.1;NP_001349567.1;NP_001349568.1;NP_001349569.1;NP_001349570.1;NP_058616.1;XP_006532112.1;XP_006532113.1;XP_006532114.1;XP_006532117.1;XP_006532118.1;XP_030101351.1;XP_030101352.1	103286	.	20709	18731	20901	20089	20186	15146
11977	NM_001109757,NM_009726,XM_030251205,XM_030251206	Atp7a	ATPase, Cu++ transporting, alpha polypeptide	protein_coding	NP_001103227.1;NP_033856.3;XP_030107065.1;XP_030107066.1	99400	.	672	622	546	504	458	539
11979	NM_007511,XM_006509007,XM_011242119,XM_017312538,XR_378777	Atp7b	ATPase, Cu++ transporting, beta polypeptide	protein_coding	NP_031537.2;XP_006509070.1;XP_011240421.1;XP_017168027.1	103297	.	62	108	77	61	62	78
11980	NM_001038999,NM_001284345,NM_009727,XM_006503703,XM_006503704,XM_006503705,XM_011240698,XM_017320623,XM_017320624,XM_017320625,XM_017320626	Atp8a1	ATPase, aminophospholipid transporter (APLT), class I, type 8A, member 1	protein_coding	NP_001034088.1;NP_001271274.1;NP_033857.1;XP_006503766.1;XP_006503767.1;XP_006503768.1;XP_011239000.1;XP_017176112.1;XP_017176113.1;XP_017176114.1;XP_017176115.1	1330848	.	12798	13645	13688	12831	11159	11438
11981	NM_001289445,NM_001289446,NM_001354977,NM_001354978,NM_015731,XM_006498603,XM_017315066,XM_017315067,XM_030246882	Atp9a	ATPase, class II, type 9A	protein_coding	NP_001276374.1;NP_001276375.1;NP_001341906.1;NP_001341907.1;NP_056546.2;XP_006498666.1;XP_017170555.1;XP_017170556.1;XP_030102742.1	1330826	.	15810	15260	18074	16803	16794	13638
11982	NM_009728,XM_006540580,XM_006540581,XM_006540583,XM_017321952,XR_882009	Atp10a	ATPase, class V, type 10A	protein_coding	NP_033858.2;XP_006540643.1;XP_006540644.1;XP_006540646.1;XP_017177441.1	1330809	.	288	471	431	467	371	486
11983	NM_007512,XM_030253106,XM_030253107	Atpif1	ATPase inhibitory factor 1	protein_coding	NP_031538.2;XP_030108966.1;XP_030108967.1	1196457	.	2968	3107	3159	3245	3094	2926
11984	NM_001361531,NM_001361532,NM_001361533,NM_001361534,NM_001361535,NM_009729	Atp6v0c	ATPase, H+ transporting, lysosomal V0 subunit C	protein_coding	NP_001348460.1;NP_001348461.1;NP_001348462.1;NP_001348463.1;NP_001348464.1;NP_033859.1	88116	.	22859	25473	24812	26160	25308	21316
11987	NM_001301424,NM_007513,XM_006504796	Slc7a1	solute carrier family 7 (cationic amino acid transporter, y+ system), member 1	protein_coding	NP_001288353.1;NP_031539.3;XP_006504859.1	88117	.	2378	2323	2551	2419	2207	1998
11988	NM_001044740,NM_007514,XM_006509250,XM_006509251,XM_006509252,XM_006509253	Slc7a2	solute carrier family 7 (cationic amino acid transporter, y+ system), member 2	protein_coding	NP_001038205.1;NP_031540.2;XP_006509313.1;XP_006509314.1;XP_006509315.1;XP_006509316.1	99828	.	1462	2548	1661	1782	1295	2094
11989	NM_001301840,NM_007515,XM_006527753,XM_011247513,XM_017318364,XM_030251207,XM_030251208	Slc7a3	solute carrier family 7 (cationic amino acid transporter, y+ system), member 3	protein_coding	NP_001288769.1;NP_031541.1;XP_006527816.1;XP_011245815.1;XP_017173853.1;XP_030107067.1;XP_030107068.1	1100521	.	124	119	147	149	219	216
11990	NM_009730,XM_006498606,XM_011239259	Atrn	attractin	protein_coding	NP_033860.2;XP_006498669.1;XP_011237561.1	1341628	.	11517	11584	12297	11647	10416	10085
11991	NM_001077265,NM_001077266,NM_001077267,NM_007516,XM_006534735,XR_389257,XR_389258	Hnrnpd	heterogeneous nuclear ribonucleoprotein D	protein_coding	NP_001070733.1;NP_001070734.1;NP_001070735.1;NP_031542.2;XP_006534798.1	101947	.	5409	5548	5620	5260	5227	5497
11992	NM_016709,XM_006516846,XM_017315373,XM_030247133,XR_003950422	Auh	AU RNA binding protein/enoyl-coenzyme A hydratase	protein_coding	NP_057918.2;XP_006516909.1;XP_017170862.1;XP_030102993.1	1338011	.	1712	1838	1853	1714	1812	1423
11993	NM_001301649,NM_007517,NR_125891,XR_377415,XR_377416	Aup1	ancient ubiquitous protein 1	protein_coding	NP_001288578.1;NP_031543.2	107789	.	1268	1382	1400	1479	1289	1250
11994	NM_001142735,NM_001142736,NM_001142737,NM_001142738,NM_001142739,NM_001142740,NM_001142741,NM_001142742,NM_001142743,NM_001142746,NM_001142747,NM_001142748,NM_001142760,NM_023115,XM_006513155,XM_006513156,XM_017313784,XM_017313785,XR_001779426,XR_001779427,XR_001779428,XR_001779429,XR_001779430,XR_001779431,XR_001779432,XR_001779433,XR_001779434,XR_001779435,XR_001779436,XR_001779438,XR_001779440…	Pcdh15	protocadherin 15	protein_coding	NP_001136207.1;NP_001136208.1;NP_001136209.1;NP_001136210.1;NP_001136211.1;NP_001136212.1;NP_001136213.1;NP_001136214.1;NP_001136215.1;NP_001136218.1;NP_001136219.1;NP_001136220.1;NP_001136232.1;NP_075604.2;XP_006513218.1;XP_006513219.1;XP_017169273.1;XP_017169274.1	1891428	.	144	225	171	157	148	159
11997	NM_009731	Akr1b7	aldo-keto reductase family 1, member B7	protein_coding	NP_033861.2	101918	.	0	0	2	0	0	0
11998	NM_009732	Avp	arginine vasopressin	protein_coding	NP_033862.1	88121	.	0	10	7	0	10	10
12000	NM_001276298,NM_001276299,NM_019404,XM_006527756,XM_017318365	Avpr2	arginine vasopressin receptor 2	protein_coding	NP_001263227.1;NP_001263228.1;NP_062277.1;XP_006527819.1;XP_017173854.1	88123	.	0	0	0	0	0	0
12005	NM_001159598,NM_009733,XM_006523515,XM_006523516,XM_030249451,XM_030249452	Axin1	axin 1	protein_coding	NP_001153070.1;NP_033863.2;XP_006523578.1;XP_006523579.1;XP_030105311.1;XP_030105312.1	1096327	.	1216	1363	1294	1355	1294	1258
12006	NM_015732,XM_006532057,XM_006532058,XM_006532059,XM_006532060,XM_030245493	Axin2	axin 2	protein_coding	NP_056547.3;XP_006532120.1;XP_006532121.1;XP_006532122.1;XP_006532123.1;XP_030101353.1	1270862	.	644	728	620	629	567	551
12007	NM_013478	Azgp1	alpha-2-glycoprotein 1, zinc	protein_coding	NP_038506.2	103163	.	0	0	0	0	0	0
12009	NM_009734,XM_006532061,XR_003949250,XR_003949252,XR_003949253,XR_003949254	Cep131	centrosomal protein 131	protein_coding	NP_033864.3;XP_006532124.1	107440	.	803	715	795	780	736	681
12010	NM_009735	B2m	beta-2 microglobulin	protein_coding	NP_033865.2	88127	.	3299	5302	3105	3782	2653	3907
12012	NM_007519,XM_006537565	Baat	bile acid-Coenzyme A: amino acid N-acyltransferase	protein_coding	NP_031545.2;XP_006537628.1	106642	.	0	5	7	7	9	4
12013	NM_007520,XM_006522879,XM_030248939	Bach1	BTB and CNC homology 1, basic leucine zipper transcription factor 1	protein_coding	NP_031546.1;XP_006522942.1;XP_030104799.1	894680	.	468	772	552	568	519	602
12014	NM_001109661,XM_006537566,XM_006537567,XM_011249908,XM_011249909,XM_011249910,XM_030253108,XM_030253109,XM_030253110,XM_030253111,XM_030253112,XM_030253113	Bach2	BTB and CNC homology, basic leucine zipper transcription factor 2	protein_coding	NP_001103131.1;XP_006537629.1;XP_006537630.1;XP_011248210.1;XP_011248211.1;XP_011248212.1;XP_030108968.1;XP_030108969.1;XP_030108970.1;XP_030108971.1;XP_030108972.1;XP_030108973.1	894679	.	399	412	444	425	419	403
12015	NM_001285453,NM_007522	Bad	BCL2-associated agonist of cell death	protein_coding	NP_001272382.1;NP_031548.1	1096330	.	668	711	774	771	695	576
12017	NM_001171739,NM_009736	Bag1	BCL2-associated athanogene 1	protein_coding	NP_001165210.1;NP_033866.4	108047	.	2703	3106	2981	3108	3035	3064
12018	NM_007523,NR_149749	Bak1	BCL2-antagonist/killer 1	protein_coding	NP_031549.2	1097161	.	357	446	423	392	371	303
12020	NM_007524	Nkx3-2	NK3 homeobox 2	protein_coding	NP_031550.2	108015	.	0	0	0	0	0	0
12021	NM_007525,XM_006495631,XM_006495632,XR_003947336	Bard1	BRCA1 associated RING domain 1	protein_coding	NP_031551.1;XP_006495694.1;XP_006495695.1	1328361	.	19	11	21	10	16	13
12022	NM_007526	Barx1	BarH-like homeobox 1	protein_coding	NP_031552.2	103124	.	0	0	0	0	0	0
12023	NM_013800	Barx2	BarH-like homeobox 2	protein_coding	NP_038828.2	109617	.	30	39	34	42	43	62
12028	NM_007527,XM_006540584,XM_011250780	Bax	BCL2-associated X protein	protein_coding	NP_031553.1;XP_006540647.1;XP_011249082.1	99702	.	736	869	864	842	798	729
12029	NM_007528,XM_030245494	Bcl6b	B cell CLL/lymphoma 6, member B	protein_coding	NP_031554.1;XP_030101354.1	1278332	.	79	90	85	92	49	74
12032	NM_001109758,NM_007529,XM_006500936,XM_006500937,XM_030252396	Bcan	brevican	protein_coding	NP_001103228.1;NP_031555.2;XP_006500999.1;XP_006501000.1;XP_030108256.1	1096385	.	7163	8690	9490	8581	7412	7622
12033	NM_001164090,NM_007530	Bcap29	B cell receptor associated protein 29	protein_coding	NP_001157562.1;NP_031556.1	101917	.	1652	1786	1603	1607	1708	1613
12034	NM_007531	Phb2	prohibitin 2	protein_coding	NP_031557.2	102520	.	2000	2319	2191	2315	2160	2030
12035	NM_001024468,NM_007532,XM_011241566	Bcat1	branched chain aminotransferase 1, cytosolic	protein_coding	NP_001019639.1;NP_031558.3;XP_011239868.1	104861	.	4397	4235	4630	4196	4564	3203
12036	NM_001243052,NM_009737,XM_017321953,XM_017321954,XR_003946378	Bcat2	branched chain aminotransferase 2, mitochondrial	protein_coding	NP_001229981.1;NP_033867.1;XP_017177442.1;XP_017177443.1	1276534	.	216	247	262	260	264	204
12038	NM_009738,XM_011240000	Bche	butyrylcholinesterase	protein_coding	NP_033868.3;XP_011238302.1	894278	.	293	407	305	257	194	252
12039	NM_007533,XM_006539486,XM_030242029,XM_030242030	Bckdha	branched chain ketoacid dehydrogenase E1, alpha polypeptide	protein_coding	NP_031559.3;XP_006539549.1;XP_030097889.1;XP_030097890.1	107701	.	1453	1939	1699	1685	1459	1317
12040	NM_001305935,NM_199195,XM_006510786,XM_006510788,XM_017313114	Bckdhb	branched chain ketoacid dehydrogenase E1, beta polypeptide	protein_coding	NP_001292864.1;NP_954665.1;XP_006510849.1;XP_006510851.1;XP_017168603.1	88137	.	699	746	778	791	838	672
12041	NM_009739	Bckdk	branched chain ketoacid dehydrogenase kinase	protein_coding	NP_033869.1	1276121	.	1391	1526	1404	1490	1402	1184
12042	NM_009740	Bcl10	B cell leukemia/lymphoma 10	protein_coding	NP_033870.1	1337994	.	430	502	493	525	458	543
12043	NM_009741,NM_177410	Bcl2	B cell leukemia/lymphoma 2	protein_coding	NP_033871.2;NP_803129.2	88138	.	495	580	410	456	525	797
12044	NM_009742	Bcl2a1a	B cell leukemia/lymphoma 2 related protein A1a	protein_coding	NP_033872.1	102687	.	7	15	13	16	3	14
12045	NM_007534	Bcl2a1b	B cell leukemia/lymphoma 2 related protein A1b	protein_coding	NP_031560.2	1278326	.	25	77	24	48	28	55
12046	NM_007535	Bcl2a1c	B cell leukemia/lymphoma 2 related protein A1c	protein_coding	NP_031561.2	1278327	.	0	0	0	0	0	0
12047	NM_007536	Bcl2a1d	B cell leukemia/lymphoma 2 related protein A1d	protein_coding	NP_031562.1	1278325	.	4	14	0	6	7	9
12048	NM_001289716,NM_001289717,NM_001289739,NM_001355053,NM_009743,NR_149254,XM_006498611,XM_006498612,XM_011239260,XM_030246899,XR_374396	Bcl2l1	BCL2-like 1	protein_coding	NP_001276645.1;NP_001276646.1;NP_001276668.1;NP_001341982.1;NP_033873.3;XP_006498674.1;XP_006498675.1;XP_011237562.1;XP_030102759.1	88139	.	4550	5326	5186	4830	4695	4351
12049	NM_013479	Bcl2l10	Bcl2-like 10	protein_coding	NP_038507.1	1330841	.	0	0	0	0	0	0
12050	NM_007537,XM_006518457,XM_006518458	Bcl2l2	BCL2-like 2	protein_coding	NP_031563.1;XP_006518520.1;XP_006518521.1	108052	.	4535	4592	5254	4918	5052	4632
12051	NM_033601,XM_006539487	Bcl3	B cell leukemia/lymphoma 3	protein_coding	NP_291079.2;XP_006539550.1	88140	.	6	13	12	11	18	16
12053	NM_001348026,NM_009744,XM_030248940,XM_030248941	Bcl6	B cell leukemia/lymphoma 6	protein_coding	NP_001334955.1;NP_033874.1;XP_030104800.1;XP_030104801.1	107187	.	2743	2477	3283	2792	2747	2421
12054	NM_009745	Bcl7b	B cell CLL/lymphoma 7B	protein_coding	NP_033875.2	1332238	.	1426	1609	1610	1612	1562	1402
12055	NM_001347652,NM_009746	Bcl7c	B cell CLL/lymphoma 7C	protein_coding	NP_001334581.1;NP_033876.1	1332237	.	460	541	493	487	466	529
12057	NM_007538	Opn1sw	opsin 1 (cone pigments), short-wave-sensitive (color blindness, tritan)	protein_coding	NP_031564.1	99438	.	2	2	0	3	0	0
12061	NM_007539	Bdkrb1	bradykinin receptor, beta 1	protein_coding	NP_031565.1	88144	.	10	23	10	11	10	15
12062	NM_009747,XM_006515442,XM_011243991	Bdkrb2	bradykinin receptor, beta 2	protein_coding	NP_033877.3;XP_006515505.1;XP_011242293.1	102845	.	40	71	39	43	46	78
12064	NM_001048139,NM_001048141,NM_001048142,NM_001285416,NM_001285417,NM_001285418,NM_001285419,NM_001285420,NM_001285421,NM_001285422,NM_001316310,NM_007540	Bdnf	brain derived neurotrophic factor	protein_coding	NP_001041604.1;NP_001041606.1;NP_001041607.1;NP_001272345.1;NP_001272346.1;NP_001272347.1;NP_001272348.1;NP_001272349.1;NP_001272350.1;NP_001272351.1;NP_001303239.1;NP_031566.4	88145	.	2887	3186	2902	3243	2703	2292
12068	NM_009748,XM_006504971	Bet1	Bet1 golgi vesicular membrane trafficking protein	protein_coding	NP_033878.1;XP_006505034.1	1343104	.	568	734	689	631	539	713
12069	NM_009749	Bex2	brain expressed X-linked 2	protein_coding	NP_033879.1	1338017	.	5526	6088	6309	6143	6387	5922
12070	NM_001110233,NM_001110234,NM_009750	Bex3	brain expressed X-linked 3	protein_coding	NP_001103703.1;NP_001103704.1;NP_033880.1	1338016	.	3859	3921	4315	4525	4302	3782
12075	NM_001291061,NM_009751,XM_011239261,XM_011239264,XM_011239265,XM_011239266,XM_030246932	Bfsp1	beaded filament structural protein 1, in lens-CP94	protein_coding	NP_001277990.1;NP_033881.2;XP_011237563.1;XP_011237566.1;XP_011237567.1;XP_011237568.1;XP_030102792.1	101770	.	26	30	23	22	23	39
12091	NM_009752,NR_108101,NR_108102	Glb1	galactosidase, beta 1	protein_coding	NP_033882.1	88151	.	1056	895	852	947	886	779
12095	NM_001305448,NM_001305449,NM_001305450,NM_031368	Bglap3	bone gamma-carboxyglutamate protein 3	protein_coding	NP_001292377.1;NP_001292378.1;NP_001292379.1;NP_112736.3	88155	.	2	0	0	0	0	0
12096	NM_007541	Bglap	bone gamma carboxyglutamate protein	protein_coding	NP_031567.1	88156	.	0	0	0	0	2	0
12097	NM_001032298	Bglap2	bone gamma-carboxyglutamate protein 2	protein_coding	NP_001027469.2	88157	.	0	0	0	0	0	0
12111	NM_007542,XM_006527758	Bgn	biglycan	protein_coding	NP_031568.2;XP_006527821.1	88158	.	538	1537	577	891	469	1249
12116	NM_016668	Bhmt	betaine-homocysteine methyltransferase	protein_coding	NP_057877.1	1339972	.	18	0	2	0	0	9
12121	NM_001112796,NM_009753,XM_006507014,XM_006507015,XM_006507016,XM_006507017,XM_006507018,XM_006507019,XM_006507020,XM_006507023,XM_006507024,XM_030255123,XR_003956156,XR_869604	Bicd1	BICD cargo adaptor 1	protein_coding	NP_001106267.1;NP_033883.2;XP_006507077.1;XP_006507078.1;XP_006507079.1;XP_006507080.1;XP_006507081.1;XP_006507082.1;XP_006507083.1;XP_006507086.1;XP_006507087.1;XP_030110983.1	1101760	.	1648	1444	1403	1327	1318	1289
12122	NM_007544,XM_006505409,XM_006505410,XM_006505411	Bid	BH3 interacting domain death agonist	protein_coding	NP_031570.2;XP_006505472.1;XP_006505473.1;XP_006505474.1	108093	.	389	432	483	513	452	362
12123	NM_007545	Hrk	harakiri, BCL2 interacting protein (contains only BH3 domain)	protein_coding	NP_031571.1	1201608	.	1848	2793	2426	2503	2199	2238
12124	NM_007546,XM_006520353,XM_006520354,XM_006520355,XM_006520356,XM_006520357	Bik	BCL2-interacting killer	protein_coding	NP_031572.1;XP_006520416.1;XP_006520417.1;XP_006520418.1;XP_006520419.1;XP_006520420.1	1206591	.	0	0	0	3	0	0
12125	NM_001284410,NM_001291016,NM_009754,NM_207680,NM_207681,XM_006498614,XM_006498615,XM_006498616,XM_006498617	Bcl2l11	BCL2-like 11 (apoptosis facilitator)	protein_coding	NP_001271339.1;NP_001277945.1;NP_033884.1;NP_997563.1;NP_997564.1;XP_006498677.1;XP_006498678.1;XP_006498679.1;XP_006498680.1	1197519	.	197	274	239	249	219	209
12140	NM_021272	Fabp7	fatty acid binding protein 7, brain	protein_coding	NP_067247.1	101916	.	512	703	630	725	610	904
12142	NM_007548,XM_006512502,XM_006512503,XM_006512504,XM_006512505,XM_011243109	Prdm1	PR domain containing 1, with ZNF domain	protein_coding	NP_031574.2;XP_006512565.1;XP_006512566.1;XP_006512567.1;XP_006512568.1;XP_011241411.1	99655	.	34	34	22	16	9	29
12143	NM_007549	Blk	B lymphoid kinase	protein_coding	NP_031575.2	88169	.	0	0	0	0	0	0
12144	NM_001042527,NM_007550,XM_017321956,XM_017321957,XR_001785468	Blm	Bloom syndrome, RecQ like helicase	protein_coding	NP_001035992.1;NP_031576.4;XP_017177445.1;XP_017177446.1	1328362	.	150	151	149	148	150	118
12145	NM_007551	Cxcr5	chemokine (C-X-C motif) receptor 5	protein_coding	NP_031577.2	103567	.	0	0	0	0	0	0
12151	NM_007552,XM_006497311,XM_006497312	Bmi1	Bmi1 polycomb ring finger oncogene	protein_coding	NP_031578.2;XP_006497374.1;XP_006497375.1	88174	.	2151	2309	1976	2055	1953	1934
12153	NM_001360021,NM_009755,NR_033241,XM_011244931,XM_011244932,XM_011244933,XM_017315805,XM_030247613,XM_030247614,XR_001781089,XR_001781090,XR_003950816,XR_003950817,XR_383136	Bmp1	bone morphogenetic protein 1	protein_coding	NP_001346950.1;NP_033885.2;XP_011243233.1;XP_011243234.1;XP_011243235.1;XP_017171294.1;XP_030103473.1;XP_030103474.1	88176	.	634	675	786	749	556	539
12154	NM_009756	Bmp10	bone morphogenetic protein 10	protein_coding	NP_033886.2	1338820	.	0	0	0	0	0	0
12155	NM_009757	Bmp15	bone morphogenetic protein 15	protein_coding	NP_033887.1	1316745	.	6	0	2	4	0	0
12156	NM_007553	Bmp2	bone morphogenetic protein 2	protein_coding	NP_031579.2	88177	.	68	62	77	69	66	118
12159	NM_001316360,NM_007554	Bmp4	bone morphogenetic protein 4	protein_coding	NP_001303289.1;NP_031580.2	88180	.	66	83	58	65	52	68
12160	NM_007555	Bmp5	bone morphogenetic protein 5	protein_coding	NP_031581.2	88181	.	47	49	26	48	18	35
12161	NM_007556	Bmp6	bone morphogenetic protein 6	protein_coding	NP_031582.1	88182	.	523	652	351	386	268	491
12162	NM_007557	Bmp7	bone morphogenetic protein 7	protein_coding	NP_031583.2	103302	.	344	196	154	174	152	172
12163	NM_001256019,NM_007558	Bmp8a	bone morphogenetic protein 8a	protein_coding	NP_001242948.1;NP_031584.1	104515	.	0	0	0	3	0	0
12164	NM_007559,XM_011240420	Bmp8b	bone morphogenetic protein 8b	protein_coding	NP_031585.2;XP_011238722.1	107335	.	3	0	2	4	6	3
12165	NM_019506	Gdf2	growth differentiation factor 2	protein_coding	NP_062379.3	1321394	.	0	0	0	0	0	0
12166	NM_009758,XM_006518469,XM_006518470,XM_017315806,XM_030247615	Bmpr1a	bone morphogenetic protein receptor, type 1A	protein_coding	NP_033888.2;XP_006518532.1;XP_006518533.1;XP_017171295.1;XP_030103475.1	1338938	.	2920	3555	2840	3029	2471	2992
12167	NM_001277216,NM_001277217,NM_001277218,NM_001277220,NM_001355043,NM_007560,XM_006500939,XM_006500940,XM_006500942,XM_006500943,XM_006500944,XM_030252398	Bmpr1b	bone morphogenetic protein receptor, type 1B	protein_coding	NP_001264145.1;NP_001264146.1;NP_001264147.1;NP_001264149.1;NP_001341972.1;NP_031586.1;XP_006501002.1;XP_006501003.1;XP_006501005.1;XP_006501006.1;XP_006501007.1;XP_030108258.1	107191	.	863	1433	1009	1213	915	1438
12168	NM_007561,XM_006495633	Bmpr2	bone morphogenetic protein receptor, type II (serine/threonine kinase)	protein_coding	NP_031587.1;XP_006495696.1	1095407	.	7688	6992	7604	7156	6189	6904
12169	NM_009759	Bmx	BMX non-receptor tyrosine kinase	protein_coding	NP_033889.2	1101778	.	29	51	40	26	27	48
12173	NM_007562,XM_011250781,XM_011250782	Bnc1	basonuclin 1	protein_coding	NP_031588.2;XP_011249083.1;XP_011249084.1	1097164	.	0	0	0	0	0	0
12175	NM_001008238,NM_001374750,NM_016787,XM_006510791,XM_006510793	Bnip2	BCL2/adenovirus E1B interacting protein 2	protein_coding	NP_001008239.1;NP_001361679.1;NP_058067.2;XP_006510854.2;XP_006510856.2	109327	.	747	960	829	827	814	811
12176	NM_009760	Bnip3	BCL2/adenovirus E1B interacting protein 3	protein_coding	NP_033890.1	109326	.	4173	4372	4295	4085	4228	3239
12177	NM_009761,XM_006518471,XM_017315807	Bnip3l	BCL2/adenovirus E1B interacting protein 3-like	protein_coding	NP_033891.1;XP_006518534.1;XP_017171296.1	1332659	.	6234	7444	6653	6644	6180	6550
12180	NM_001160127,NM_009762	Smyd1	SET and MYND domain containing 1	protein_coding	NP_001153599.1;NP_033892.2	104790	.	83	77	56	68	80	59
12181	NM_013481	Bop1	block of proliferation 1	protein_coding	NP_038509.1	1334460	.	2206	2539	2674	2515	2456	1797
12182	NM_009763,XM_006503706	Bst1	bone marrow stromal cell antigen 1	protein_coding	NP_033893.2;XP_006503769.1	105370	.	18	15	9	17	14	15
12183	NM_001363708,NM_001363709,NM_001363710,NM_007563,NR_156731	Bpgm	2,3-bisphosphoglycerate mutase	protein_coding	NP_001350637.1;NP_001350638.1;NP_001350639.1;NP_031589.1	1098242	.	2509	3339	2876	2722	2420	2687
12189	NM_009764,XM_006532064,XM_006532068,XM_017314233,XM_030245495	Brca1	breast cancer 1, early onset	protein_coding	NP_033894.3;XP_006532127.1;XP_006532131.1;XP_017169722.1;XP_030101355.1	104537	.	54	73	53	67	36	83
12190	NM_001081001,NM_009765,XM_006504906,XM_006504907,XM_011241019,XR_001784600,XR_377265	Brca2	breast cancer 2, early onset	protein_coding	NP_001074470.1;NP_033895.2;XP_006504969.1;XP_006504970.1;XP_011239321.1	109337	.	94	106	92	90	72	111
12192	NM_007564	Zfp36l1	zinc finger protein 36, C3H type-like 1	protein_coding	NP_031590.1	107946	.	872	1523	938	1005	714	1382
12193	NM_001001806	Zfp36l2	zinc finger protein 36, C3H type-like 2	protein_coding	NP_001001806.1	107945	.	523	767	545	554	416	665
12209	NM_009766	Brs3	bombesin-like receptor 3	protein_coding	NP_033896.2	1100501	.	0	0	0	0	6	0
12211	NM_007566,XM_006523518,XM_006523519,XM_006523520,XM_006523521,XM_006523522,XM_006523523,XM_006523524,XM_006523526,XM_006523527,XM_006523528,XM_011246257,XM_030249453,XM_030249454,XM_030249455,XM_030249456,XM_030249457,XM_030249458,XR_003952078,XR_003952080,XR_385268	Birc6	baculoviral IAP repeat-containing 6	protein_coding	NP_031592.3;XP_006523581.1;XP_006523582.1;XP_006523583.1;XP_006523584.1;XP_006523585.1;XP_006523586.1;XP_006523587.1;XP_006523589.1;XP_006523590.1;XP_006523591.1;XP_011244559.1;XP_030105313.1;XP_030105314.1;XP_030105315.1;XP_030105316.1;XP_030105317.1;XP_030105318.1	1276108	.	3819	3967	4167	3670	3448	3458
12212	NM_009767,XM_006527760	Chic1	cysteine-rich hydrophobic domain 1	protein_coding	NP_033897.1;XP_006527823.1	1344694	.	1774	1619	1547	1489	1546	1600
12215	NM_001077184,NM_009768	Bsg	basigin	protein_coding	NP_001070652.1;NP_033898.1	88208	.	15208	13719	13537	13777	13257	10630
12217	NM_007567,XM_006511634	Bsn	bassoon	protein_coding	NP_031593.2;XP_006511697.1	1277955	.	16307	16673	20683	17642	15868	13377
12223	NM_007568	Btc	betacellulin, epidermal growth factor family member	protein_coding	NP_031594.1	99439	.	5	20	11	5	8	16
12224	NM_009769	Klf5	Kruppel-like factor 5	protein_coding	NP_033899.2	1338056	.	50	35	58	51	95	99
12226	NM_007569	Btg1	BTG anti-proliferation factor 1	protein_coding	NP_031595.1	88215	.	1220	1552	1227	1509	1366	1403
12227	NM_007570	Btg2	BTG anti-proliferation factor 2	protein_coding	NP_031596.1	108384	.	772	1128	741	852	596	678
12228	NM_001297747,NM_009770	Btg3	BTG anti-proliferation factor 3	protein_coding	NP_001284676.1;NP_033900.1	109532	.	465	589	558	561	538	556
12229	NM_013482,XM_006528483,XM_006528484,XM_006528485	Btk	Bruton agammaglobulinemia tyrosine kinase	protein_coding	NP_038510.2;XP_006528546.1;XP_006528547.1;XP_006528548.1	88216	.	46	82	38	53	38	75
12231	NM_013483,XM_006516535	Btn1a1	butyrophilin, subfamily 1, member A1	protein_coding	NP_038511.1;XP_006516598.1	103118	.	3	0	0	0	0	0
12234	NM_001037758,NM_001286465,NM_001286466,NM_001360120,NM_001360122,NM_001360124,NM_001360126,NM_001360127,NM_009771,XM_006526612,XM_006526613,XM_006526614,XM_006526615,XM_011247119,XM_011247120,XM_011247121,XM_011247123,XM_011247127,XM_030250711,XM_030250712,XM_030250713,XM_030250714,XM_030250715,XM_030250716,XM_030250718,XM_030250719,XM_030250720,XM_030250721,XM_030250722	Btrc	beta-transducin repeat containing protein	protein_coding	NP_001032847.2;NP_001273394.1;NP_001273395.1;NP_001347049.1;NP_001347051.1;NP_001347053.1;NP_001347055.1;NP_001347056.1;NP_033901.1;XP_006526675.1;XP_006526676.1;XP_006526677.2;XP_006526678.1;XP_011245421.1;XP_011245422.1;XP_011245423.1;XP_011245425.1;XP_011245429.1;XP_030106571.1;XP_030106572.1;XP_030106573.1;XP_030106574.1;XP_030106575.1;XP_030106576.1;XP_030106578.1;XP_030106579.1;XP_030106580…	1338871	.	4764	4627	5338	5051	4934	4131
12235	NM_001113179,NM_009772,XM_006498620	Bub1	BUB1, mitotic checkpoint serine/threonine kinase	protein_coding	NP_001106650.1;NP_033902.2;XP_006498683.1	1100510	.	7	9	8	0	8	5
12236	NM_009773,XM_006498622	Bub1b	BUB1B, mitotic checkpoint serine/threonine kinase	protein_coding	NP_033903.2;XP_006498685.1	1333889	.	52	71	69	55	49	60
12237	NM_001317350,NM_009774,XM_006507271	Bub3	BUB3 mitotic checkpoint protein	protein_coding	NP_001304279.1;NP_033904.2;XP_006507334.1	1343463	.	2426	2826	2740	2814	2519	2327
12238	NM_147778	Commd3	COMM domain containing 3	protein_coding	NP_680087.1	88218	.	1599	1774	1625	1731	1716	1528
12257	NM_009775	Tspo	translocator protein	protein_coding	NP_033905.3	88222	.	104	211	134	113	90	147
12258	NM_009776,XM_006498623	Serping1	serine (or cysteine) peptidase inhibitor, clade G, member 1	protein_coding	NP_033906.2;XP_006498686.1	894696	.	227	466	246	310	181	311
12259	NM_007572	C1qa	complement component 1, q subcomponent, alpha polypeptide	protein_coding	NP_031598.2	88223	.	1840	3736	2041	2629	1756	3178
12260	NM_009777	C1qb	complement component 1, q subcomponent, beta polypeptide	protein_coding	NP_033907.1	88224	.	1708	3833	2077	2724	1674	2672
12261	NM_007573	C1qbp	complement component 1, q subcomponent binding protein	protein_coding	NP_031599.2	1194505	.	1819	2062	1934	2065	1955	1738
12262	NM_007574,XM_017319927	C1qc	complement component 1, q subcomponent, C chain	protein_coding	NP_031600.2;XP_017175416.1	88225	.	1525	2976	1859	2141	1434	2415
12263	NM_013484	C2	complement component 2 (within H-2S)	protein_coding	NP_038512.2	88226	.	23	16	18	24	19	21
12265	NM_001243760,NM_001243761,NM_001302618,NM_001302619,NM_007575,XM_006521724,XM_006521726,XM_011245810,XM_030248943,XR_001781783	Ciita	class II transactivator	protein_coding	NP_001230689.1;NP_001230690.1;NP_001289547.1;NP_001289548.1;NP_031601.1;XP_006521787.1;XP_006521789.1;XP_011244112.1;XP_030104803.1	108445	.	5	12	0	10	0	0
12266	NM_009778,XM_011246258	C3	complement component 3	protein_coding	NP_033908.2;XP_011244560.1	88227	.	136	481	119	163	88	395
12267	NM_009779	C3ar1	complement component 3a receptor 1	protein_coding	NP_033909.1	1097680	.	132	185	103	149	93	185
12268	NM_009780,XM_006523531,XM_006523532,XM_030249459	C4b	complement component 4B (Chido blood group)	protein_coding	NP_033910.2;XP_006523594.1;XP_006523595.1;XP_030105319.1	88228	.	1898	7974	2063	3735	1508	6403
12269	NM_007576,XM_011247906,XM_017312492	C4bp	complement component 4 binding protein	protein_coding	NP_031602.3;XP_011246208.1;XP_017167981.1	88229	.	48	34	27	38	50	20
12270	NR_028304	C4bp-ps1	complement component 4 binding protein, pseudogene 1	transcribed_pseudogene	.	99594	.	0	0	0	0	0	0
12273	NM_001173550,NM_007577	C5ar1	complement component 5a receptor 1	protein_coding	NP_001167021.1;NP_031603.2	88232	.	40	39	33	45	28	48
12274	NM_016704,XM_006519957,XM_006519958,XM_006519959	C6	complement component 6	protein_coding	NP_057913.2;XP_006520020.1;XP_006520021.1;XP_006520022.1	88233	.	0	0	0	0	0	0
12279	NM_001368420,NM_001368421,NM_013485	C9	complement component 9	protein_coding	NP_001355349.1;NP_001355350.1;NP_038513.2	1098282	.	0	0	0	0	0	0
12282	NM_021395,XM_006509959,XM_006509960,XM_006509961,XM_006509962	Hyou1	hypoxia up-regulated 1	protein_coding	NP_067370.3;XP_006510022.1;XP_006510023.1;XP_006510024.1;XP_006510025.1	108030	.	4444	4594	4646	4890	4906	4274
12283	NM_001355046,NM_001355047,NM_133781,XM_006529091,XM_011247907,XM_030243907	Cab39	calcium binding protein 39	protein_coding	NP_001341975.1;NP_001341976.1;NP_598542.3;XP_006529154.1;XP_011246209.1;XP_030099767.1	107438	.	8234	8734	8673	8595	8225	7725
12286	NM_001252059,NM_001252060,NM_001252061,NM_007578,XM_006530587,XM_006530588,XM_006530589,XM_006530590,XM_006530591,XM_006530592,XM_006530593,XM_006530594,XM_006530595,XM_006530596,XM_006530597,XM_006530598,XM_006530599,XM_006530600,XM_006530601,XM_006530602,XM_006530603,XM_006530605,XM_006530609,XM_011248285,XM_030243260,XM_030243261,XM_030243262,XR_003947221,XR_003947222,XR_003947223,XR_003947224…	Cacna1a	calcium channel, voltage-dependent, P/Q type, alpha 1A subunit	protein_coding	NP_001238988.1;NP_001238989.1;NP_001238990.1;NP_031604.3;XP_006530650.1;XP_006530651.1;XP_006530652.1;XP_006530653.1;XP_006530654.1;XP_006530655.1;XP_006530656.1;XP_006530657.1;XP_006530658.1;XP_006530659.1;XP_006530660.1;XP_006530661.1;XP_006530662.1;XP_006530663.1;XP_006530664.1;XP_006530665.1;XP_006530666.1;XP_006530668.1;XP_006530672.1;XP_011246587.1;XP_030099120.1;XP_030099121.1;XP_030099122…	109482	.	6171	5351	7048	5610	5269	3321
12287	NM_001042528,NM_007579,XM_006497626,XM_006497627,XM_006497628,XM_006497629,XM_006497630,XM_006497631,XM_006497632,XM_006497633,XM_006497634,XM_006497635,XM_006497636,XM_006497637,XM_006497638,XM_006497640,XM_011239014,XM_017315140,XM_017315141,XM_017315146,XM_017315155,XM_017315156,XR_003950091,XR_374052	Cacna1b	calcium channel, voltage-dependent, N type, alpha 1B subunit	protein_coding	NP_001035993.1;NP_031605.2;XP_006497689.1;XP_006497690.1;XP_006497691.1;XP_006497692.1;XP_006497693.1;XP_006497694.1;XP_006497695.1;XP_006497696.1;XP_006497697.1;XP_006497698.1;XP_006497699.1;XP_006497700.1;XP_006497701.1;XP_006497703.1;XP_011237316.1;XP_017170629.1;XP_017170630.1;XP_017170635.1;XP_017170644.1;XP_017170645.1	88296	.	4282	3750	4854	4124	3945	3422
12288	NM_001159533,NM_001159534,NM_001159535,NM_001255997,NM_001255998,NM_001255999,NM_001256000,NM_001256001,NM_001256002,NM_001290335,NM_009781,XM_006505415,XM_006505418,XM_006505426,XM_006505427,XM_006505430,XM_006505432,XM_006505434,XM_006505435,XM_006505436,XM_006505437,XM_006505438,XM_006505439,XM_006505440,XM_006505441,XM_006505442,XM_006505443,XM_011241175,XM_011241176,XM_011241184,XM_011241185…	Cacna1c	calcium channel, voltage-dependent, L type, alpha 1C subunit	protein_coding	NP_001153005.1;NP_001153006.1;NP_001153007.1;NP_001242926.1;NP_001242927.1;NP_001242928.1;NP_001242929.1;NP_001242930.1;NP_001242931.1;NP_001277264.1;NP_033911.2;XP_006505478.1;XP_006505481.1;XP_006505489.1;XP_006505490.1;XP_006505493.1;XP_006505495.1;XP_006505497.1;XP_006505498.1;XP_006505499.1;XP_006505500.1;XP_006505501.1;XP_006505502.1;XP_006505503.1;XP_006505504.1;XP_006505505.1;XP_006505506…	103013	.	4146	4593	4651	4243	3893	3120
12289	NM_001083616,NM_001302637,NM_028981,XM_006518475,XM_006518479,XM_006518480,XM_017315808,XM_017315809,XM_017315810,XM_017315811,XM_017315812,XM_017315813,XM_017315814,XM_017315815,XM_017315816,XM_017315817,XM_017315818,XM_017315819,XM_017315820,XM_017315821,XM_017315822,XM_017315823,XM_017315824,XM_017315825,XR_001781092	Cacna1d	calcium channel, voltage-dependent, L type, alpha 1D subunit	protein_coding	NP_001077085.1;NP_001289566.1;NP_083257.2;XP_006518538.1;XP_006518542.1;XP_006518543.1;XP_017171297.1;XP_017171298.1;XP_017171299.1;XP_017171300.1;XP_017171301.1;XP_017171302.1;XP_017171303.1;XP_017171304.1;XP_017171305.1;XP_017171306.1;XP_017171307.1;XP_017171308.1;XP_017171309.1;XP_017171310.1;XP_017171311.1;XP_017171312.1;XP_017171313.1;XP_017171314.1	88293	.	1420	1467	1648	1542	1504	1280
12290	NM_009782,XM_006529105,XM_011247909,XM_011247916,XM_017312578,XM_017312613,XM_017312619,XM_017312628,XM_017312642,XM_017312660,XM_017312682,XM_017312712,XM_017312730,XM_017312745,XM_017312766,XM_017312795,XM_017312824,XM_017312848,XM_017312855,XM_017312867,XM_030243926,XM_030243929,XM_030244154	Cacna1e	calcium channel, voltage-dependent, R type, alpha 1E subunit	protein_coding	NP_033912.2;XP_006529168.1;XP_011246211.1;XP_011246218.1;XP_017168067.1;XP_017168102.1;XP_017168108.1;XP_017168117.1;XP_017168131.1;XP_017168149.1;XP_017168171.1;XP_017168201.1;XP_017168219.1;XP_017168234.1;XP_017168255.1;XP_017168284.1;XP_017168313.1;XP_017168337.1;XP_017168344.1;XP_017168356.1;XP_030099786.1;XP_030099789.1;XP_030100014.1	106217	.	11967	11501	13607	12091	10390	9968
12291	NM_001112813,NM_001177888,NM_001177890,NM_009783,XM_006532069,XM_006532070,XM_006532072,XM_006532073,XM_006532074,XM_006532075,XM_006532076,XM_006532079,XM_006532080,XM_006532081,XM_006532082,XM_006532083,XM_006532084,XM_006532085,XM_006532086,XM_006532087,XM_006532088,XM_011248686,XM_011248687,XM_011248688,XM_011248689,XM_011248690,XM_011248691,XM_011248692,XM_011248693,XM_011248694,XM_011248695…	Cacna1g	calcium channel, voltage-dependent, T type, alpha 1G subunit	protein_coding	NP_001106284.1;NP_001171359.1;NP_001171361.1;NP_033913.2;XP_006532132.1;XP_006532133.1;XP_006532135.1;XP_006532136.1;XP_006532137.1;XP_006532138.1;XP_006532139.1;XP_006532142.1;XP_006532143.1;XP_006532144.1;XP_006532145.1;XP_006532146.1;XP_006532147.1;XP_006532148.1;XP_006532149.1;XP_006532150.1;XP_006532151.1;XP_011246988.1;XP_011246989.1;XP_011246990.1;XP_011246991.1;XP_011246992.1;XP_011246993…	1201678	.	661	511	818	858	1049	1273
12292	NM_001081023,NM_014193,XM_006529106	Cacna1s	calcium channel, voltage-dependent, L type, alpha 1S subunit	protein_coding	NP_001074492.1;NP_055008.2;XP_006529169.1	88294	.	31	47	35	18	28	36
12293	NM_001110843,NM_001110844,NM_001110845,NM_001110846,NM_009784,XM_006535618,XM_006535619,XM_011249741,XM_011249742,XM_011249743,XM_011249744,XM_017320631,XM_030254085	Cacna2d1	calcium channel, voltage-dependent, alpha2/delta subunit 1	protein_coding	NP_001104313.1;NP_001104314.1;NP_001104315.1;NP_001104316.1;NP_033914.1;XP_006535681.1;XP_006535682.1;XP_011248043.1;XP_011248044.1;XP_011248045.1;XP_011248046.1;XP_017176120.1;XP_030109945.1	88295	.	9563	7862	9472	8675	7882	8031
12294	NM_009785,XM_006518486,XM_011244938,XM_030247616,XR_001781093	Cacna2d3	calcium channel, voltage-dependent, alpha2/delta subunit 3	protein_coding	NP_033915.1;XP_006518549.1;XP_011243240.1;XP_030103476.1	1338890	.	5632	4656	5988	4991	5418	3520
12295	NM_001159319,NM_001159320,NM_001282977,NM_001282978,NM_031173,NM_145121,XM_006532091,XM_006532092,XM_006532094,XM_017314236,XM_030245498,XM_030245499,XM_030245500	Cacnb1	calcium channel, voltage-dependent, beta 1 subunit	protein_coding	NP_001152791.1;NP_001152792.1;NP_001269906.1;NP_001269907.1;NP_112450.1;NP_660099.2;XP_006532154.1;XP_006532155.1;XP_006532157.1;XP_017169725.1;XP_030101358.1;XP_030101359.1;XP_030101360.1	102522	.	5673	5240	6867	6142	6244	4963
12296	NM_001252533,NM_001309519,NM_023116,XM_006497313,XM_006497314,XM_006497315,XM_006497317,XM_006497318,XM_006497319,XM_006497320,XM_006497321,XM_006497323,XM_011238946	Cacnb2	calcium channel, voltage-dependent, beta 2 subunit	protein_coding	NP_001239462.1;NP_001296448.1;NP_075605.1;XP_006497376.1;XP_006497377.1;XP_006497378.1;XP_006497380.1;XP_006497381.1;XP_006497382.1;XP_006497383.1;XP_006497384.1;XP_006497386.1;XP_011237248.1	894644	.	3069	2817	3226	3069	2721	2411
12297	NM_001044741,NM_001286226,NM_001356543,NM_007581,XM_006520360,XM_006520361,XM_006520362,XM_006520363,XM_006520364,XM_006520365,XM_006520367,XM_006520370,XM_017316415,XM_017316418,XM_017316419,XM_030248302,XM_030248303,XM_030248304,XM_030248305,XM_030248306,XM_030248307	Cacnb3	calcium channel, voltage-dependent, beta 3 subunit	protein_coding	NP_001038206.1;NP_001273155.1;NP_001343472.1;NP_031607.2;XP_006520423.1;XP_006520424.1;XP_006520425.1;XP_006520426.1;XP_006520427.1;XP_006520428.1;XP_006520430.1;XP_006520433.1;XP_017171904.1;XP_017171907.1;XP_017171908.1;XP_030104162.1;XP_030104163.1;XP_030104164.1;XP_030104165.1;XP_030104166.1;XP_030104167.1	103307	.	8301	7716	9464	9419	8938	7110
12298	NM_001037099,NM_001285426,NM_001285427,NM_001285428,NM_001355059,NM_146123,XM_006497641,XM_006497642,XM_011239015,XM_017315163,XM_030247010	Cacnb4	calcium channel, voltage-dependent, beta 4 subunit	protein_coding	NP_001032176.1;NP_001272355.1;NP_001272356.1;NP_001272357.1;NP_001341988.1;NP_666235.1;XP_006497704.1;XP_006497705.1;XP_011237317.1;XP_017170652.1;XP_030102870.1	103301	.	5284	4178	5212	4492	4407	3565
12299	NM_007582	Cacng1	calcium channel, voltage-dependent, gamma subunit 1	protein_coding	NP_031608.1	1206582	.	0	0	0	0	0	0
12300	NM_007583,XM_006520371	Cacng2	calcium channel, voltage-dependent, gamma subunit 2	protein_coding	NP_031609.1;XP_006520434.1	1316660	.	2563	2145	2765	2588	2431	1743
12301	NM_009786	Cacybp	calcyclin binding protein	protein_coding	NP_033916.1	1270839	.	2671	2788	2603	2678	2895	2664
12304	NM_001368756,NM_009787	Pdia4	protein disulfide isomerase associated 4	protein_coding	NP_001355685.1;NP_033917.2	104864	.	1928	2453	1851	2005	2147	2251
12305	NM_001198831,NM_001198833,NM_007584,NM_172962,XM_006523534,XM_006523535,XM_006523536,XM_006523537,XM_006523538,XM_011246259,XM_030249460,XM_030249461,XM_030249462,XM_030249463,XM_030249464,XR_001782030	Ddr1	discoidin domain receptor family, member 1	protein_coding	NP_001185760.1;NP_001185762.1;NP_031610.1;NP_766550.1;XP_006523597.1;XP_006523598.1;XP_006523599.1;XP_006523600.1;XP_006523601.1;XP_011244561.1;XP_030105320.1;XP_030105321.1;XP_030105322.1;XP_030105323.1;XP_030105324.1	99216	.	4867	8199	5615	5232	3614	5264
12306	NM_007585,XM_006510796	Anxa2	annexin A2	protein_coding	NP_031611.1;XP_006510859.1	88246	.	381	785	413	406	326	512
12307	NM_009788	Calb1	calbindin 1	protein_coding	NP_033918.1	88248	.	2898	3119	3445	3713	3673	3993
12308	NM_001368293,NM_001368294,NM_007586	Calb2	calbindin 2	protein_coding	NP_001355222.1;NP_001355223.1;NP_031612.1	101914	.	147	206	201	208	624	660
12309	NM_009789	S100g	S100 calcium binding protein G	protein_coding	NP_033919.1	104528	.	0	0	0	0	0	0
12310	NM_001033954,NM_001289444,NM_001305616,NM_007587,XM_011241660,XM_030242031,XM_030242032	Calca	calcitonin/calcitonin-related polypeptide, alpha	protein_coding	NP_001029126.1;NP_001276373.1;NP_001292545.1;NP_031613.2;XP_011239962.1;XP_030097891.1;XP_030097892.1	2151253	.	19	21	17	12	28	26
12311	NM_001042725,NM_001355192,NM_001377018,NM_007588	Calcr	calcitonin receptor	protein_coding	NP_001036190.1;NP_001342121.1;NP_001363947.1;NP_031614.2	101950	.	0	0	0	3	6	0
12313	NM_001313934,NM_009790	Calm1	calmodulin 1	protein_coding	NP_001300863.1;NP_033920.1	88251	.	117641	120535	120677	123134	120398	109480
12314	NM_001355703,NM_007589	Calm2	calmodulin 2	protein_coding	NP_001342632.1;NP_031615.1	103250	.	59087	55942	62248	59501	62725	54996
12315	NM_007590	Calm3	calmodulin 3	protein_coding	NP_031616.1	103249	.	68095	68691	79801	79027	75034	63580
12316	NM_009791,XM_006529108,XM_017312957	Aspm	abnormal spindle microtubule assembly	protein_coding	NP_033921.3;XP_006529171.1;XP_017168446.1	1334448	.	12	25	21	25	15	17
12317	NM_007591	Calr	calreticulin	protein_coding	NP_031617.1	88252	.	13804	13851	13849	13802	14880	14143
12319	NM_007592	Car8	carbonic anhydrase 8	protein_coding	NP_031618.2	88253	.	110	105	101	101	99	158
12321	NM_001285412,NM_007594,NM_184053	Calu	calumenin	protein_coding	NP_001272341.1;NP_031620.1;NP_908942.1	1097158	.	3933	4459	3752	4273	3897	4043
12322	NM_001286809,NM_009792,NM_177407,XM_006525541,XM_017317805	Camk2a	calcium/calmodulin-dependent protein kinase II alpha	protein_coding	NP_001273738.1;NP_033922.1;NP_803126.1;XP_006525604.1;XP_017173294.1	88256	.	186990	166306	215970	198768	178160	140157
12323	NM_001174053,NM_001174054,NM_007595,XM_006514464,XM_006514465,XM_006514467,XM_006514469,XM_006514470,XM_006514475,XM_006514476,XM_006514477,XM_006514479,XM_017314237,XM_017314238,XM_017314239,XM_017314240,XM_017314241,XM_030245501,XM_030245502,XM_030245503,XM_030245504,XM_030245505,XM_030245506,XM_030245507	Camk2b	calcium/calmodulin-dependent protein kinase II, beta	protein_coding	NP_001167524.1;NP_001167525.1;NP_031621.3;XP_006514527.1;XP_006514528.1;XP_006514530.1;XP_006514532.1;XP_006514533.1;XP_006514538.1;XP_006514539.1;XP_006514540.1;XP_006514542.1;XP_017169726.1;XP_017169727.1;XP_017169728.1;XP_017169729.1;XP_017169730.1;XP_030101361.1;XP_030101362.1;XP_030101363.1;XP_030101364.1;XP_030101365.1;XP_030101366.1;XP_030101367.1	88257	.	63207	62004	70312	67004	60141	43843
12325	NM_001039138,NM_001039139,NM_001360186,NM_178597,XM_006518488,XM_006518489,XM_006518490,XM_006518491,XM_006518492,XM_006518493,XM_006518494,XM_006518495,XM_006518496,XM_006518497,XM_006518500,XM_017315826,XM_017315827,XM_030247617,XM_030247618,XM_030247619,XM_030247620,XM_030247621,XM_030247622,XM_030247623,XM_030247624,XM_030247625,XM_030247626,XM_030247627,XM_030247628,XM_030247629,XM_030247630…	Camk2g	calcium/calmodulin-dependent protein kinase II gamma	protein_coding	NP_001034227.1;NP_001034228.1;NP_001347115.1;NP_848712.2;XP_006518551.1;XP_006518552.1;XP_006518553.1;XP_006518554.1;XP_006518555.1;XP_006518556.1;XP_006518557.1;XP_006518558.1;XP_006518559.1;XP_006518560.1;XP_006518563.1;XP_017171315.1;XP_017171316.1;XP_030103477.1;XP_030103478.1;XP_030103479.1;XP_030103480.1;XP_030103481.1;XP_030103482.1;XP_030103483.1;XP_030103484.1;XP_030103485.1;XP_030103486…	88259	.	6035	6553	7086	7191	6782	6015
12326	NM_009793,XM_006525543,XM_006525544,XM_006525546,XM_030250297,XM_030250298	Camk4	calcium/calmodulin-dependent protein kinase IV	protein_coding	NP_033923.2;XP_006525606.1;XP_006525607.1;XP_006525609.1;XP_030106157.1;XP_030106158.1	88258	.	7269	5798	7046	5992	5569	4367
12328	NM_007596	Caml	calcium modulating ligand	protein_coding	NP_031622.2	104728	.	919	1022	982	884	899	879
12330	NM_001110499,NM_001110500,NM_007597	Canx	calnexin	protein_coding	NP_001103969.1;NP_001103970.1;NP_031623.1	88261	.	14727	15864	14261	14238	14450	15594
12331	NM_001301067,NM_001358035,NM_001358036,NM_007598	Cap1	CAP, adenylate cyclase-associated protein 1 (yeast)	protein_coding	NP_001287996.1;NP_001344964.1;NP_001344965.1;NP_031624.2	88262	.	12278	14528	13956	14230	12517	10432
12332	NM_001042534,NM_001271395,NM_001271415,NM_007599,XM_017321370	Capg	capping protein (actin filament), gelsolin-like	protein_coding	NP_001035999.1;NP_001258324.1;NP_001258344.1;NP_031625.2;XP_017176859.1	1098259	.	114	274	123	165	106	207
12333	NM_001110504,NM_007600	Capn1	calpain 1	protein_coding	NP_001103974.1;NP_031626.1	88263	.	1152	1168	1259	1235	989	835
12334	NM_009794	Capn2	calpain 2	protein_coding	NP_033924.2	88264	.	2437	3126	2578	2693	2525	3105
12335	NM_001109761,NM_001177799,NM_007601	Capn3	calpain 3	protein_coding	NP_001103231.1;NP_001171270.1;NP_031627.2	107437	.	279	389	331	405	290	362
12336	NM_009795,XM_006539488,XM_011250419,XM_011250420	Capns1	calpain, small subunit 1	protein_coding	NP_033925.2;XP_006539551.1;XP_011248721.1;XP_011248722.1	88266	.	5216	6455	5390	5870	5559	4720
12337	NM_001301250,NM_007602,XM_006507275,XM_030242033,XM_030242034,XM_030242035,XM_030242036,XM_030242037,XM_030242038	Capn5	calpain 5	protein_coding	NP_001288179.1;NP_031628.1;XP_006507338.1;XP_030097893.1;XP_030097894.1;XP_030097895.1;XP_030097896.1;XP_030097897.1;XP_030097898.1	1100859	.	2898	3614	3474	3608	3326	2961
12338	NM_007603	Capn6	calpain 6	protein_coding	NP_031629.3	1100850	.	87	69	28	27	10	54
12339	NM_001360187,NM_009796,XM_006518502,XM_030247631,XR_001781094,XR_003950823	Capn7	calpain 7	protein_coding	NP_001347116.1;NP_033926.1;XP_006518565.1;XP_030103491.1	1338030	.	1827	1828	1842	1896	1869	1726
12340	NM_001355044,NM_009797	Capza1	capping protein (actin filament) muscle Z-line, alpha 1	protein_coding	NP_001341973.1;NP_033927.2	106227	.	1249	1697	1365	1400	1120	1596
12343	NM_007604	Capza2	capping protein (actin filament) muscle Z-line, alpha 2	protein_coding	NP_031630.1	106222	.	14101	14288	13877	13730	13349	11303
12344	NM_007605	Capza3	capping protein (actin filament) muscle Z-line, alpha 3	protein_coding	NP_031631.3	106221	.	0	0	0	0	0	0
12345	NM_001037761,NM_001271405,NM_009798,XM_006538504	Capzb	capping protein (actin filament) muscle Z-line, beta	protein_coding	NP_001032850.1;NP_001258334.1;NP_033928.1;XP_006538567.1	104652	.	9127	9485	9891	10031	9455	8381
12346	NM_001083957,NM_009799,XM_011248137	Car1	carbonic anhydrase 1	protein_coding	NP_001077426.1;NP_033929.2;XP_011246439.1	88268	.	4	7	0	6	4	0
12348	NM_001368349,NM_009800,XM_006540588,XM_006540589	Car11	carbonic anhydrase 11	protein_coding	NP_001355278.1;NP_033930.1;XP_006540651.1;XP_006540652.1	1336193	.	2550	2192	3221	2983	3046	2487
12349	NM_001357334,NM_009801	Car2	carbonic anhydrase 2	protein_coding	NP_001344263.1;NP_033931.4	88269	.	9221	12650	9916	9088	7689	9430
12350	NM_007606	Car3	carbonic anhydrase 3	protein_coding	NP_031632.2	88270	.	16	27	15	4	12	15
12351	NM_007607,XM_006532095	Car4	carbonic anhydrase 4	protein_coding	NP_031633.1;XP_006532158.1	1096574	.	1491	1665	1344	1631	1428	989
12352	NM_007608	Car5a	carbonic anhydrase 5a, mitochondrial	protein_coding	NP_031634.2	101946	.	7	18	14	15	11	16
12353	NM_009802	Car6	carbonic anhydrase 6	protein_coding	NP_033932.2	1333786	.	0	0	3	0	0	2
12354	NM_001301164,NM_001301165,NM_053070,XM_006530617,XM_006530618,XM_017312542,XM_030243263,XM_030243264	Car7	carbonic anhydrase 7	protein_coding	NP_001288093.1;NP_001288094.1;NP_444300.1;XP_006530680.1;XP_006530681.1;XP_017168031.1;XP_030099123.1;XP_030099124.1	103100	.	684	430	697	513	499	414
12355	NM_001243062,NM_001243063,NM_009803,XM_006496628,XM_006496629,XM_011238743,XM_030244435,XR_003947935,XR_003947948,XR_003947950,XR_373594,XR_373595	Nr1i3	nuclear receptor subfamily 1, group I, member 3	protein_coding	NP_001229991.1;NP_001229992.1;NP_033933.2;XP_006496691.1;XP_006496692.1;XP_011237045.1;XP_030100295.1	1346307	.	1	0	4	0	0	2
12359	NM_009804	Cat	catalase	protein_coding	NP_033934.2	88271	.	2728	3686	2717	3179	2516	2660
12361	NM_001284503,NM_001284504,NM_001284505,NM_009806,XM_006527560,XM_006527561,XM_011247431,XM_011247432,XM_011247433,XM_011247434,XM_011247435,XM_011247436,XM_011247437,XM_011247438,XM_011247439,XM_011247440,XM_011247441,XM_017318366,XM_017318367,XM_017318368,XM_017318369,XM_017318370,XM_017318371	Cask	calcium/calmodulin-dependent serine protein kinase (MAGUK family)	protein_coding	NP_001271432.1;NP_001271433.1;NP_001271434.1;NP_033936.2;XP_006527623.1;XP_006527624.1;XP_011245733.1;XP_011245734.1;XP_011245735.1;XP_011245736.1;XP_011245737.1;XP_011245738.1;XP_011245739.1;XP_011245740.1;XP_011245741.1;XP_011245742.1;XP_011245743.1;XP_017173855.1;XP_017173856.1;XP_017173857.1;XP_017173858.1;XP_017173859.1;XP_017173860.1	1309489	.	2154	2494	2493	2558	2410	2400
12362	NM_009807	Casp1	caspase 1	protein_coding	NP_033937.2	96544	.	42	71	31	54	45	67
12363	NM_001379318,NM_001379319,NM_001379320,NM_001379321,NM_001379322,NM_001379323,NM_007609,XM_006509839	Casp4	caspase 4, apoptosis-related cysteine peptidase	protein_coding	NP_001366247.1;NP_001366248.1;NP_001366249.1;NP_001366250.1;NP_001366251.1;NP_001366252.1;NP_031635.2;XP_006509902.1	107700	.	0	13	10	8	3	8
12364	NM_009808,XM_006509840	Casp12	caspase 12	protein_coding	NP_033938.3;XP_006509903.1	1312922	.	12	28	21	25	15	24
12365	NM_009809,XM_006513160	Casp14	caspase 14	protein_coding	NP_033939.1;XP_006513223.1	1335092	.	0	0	0	0	0	0
12366	NM_007610,XR_003956158,XR_377417,XR_377418	Casp2	caspase 2	protein_coding	NP_031636.1	97295	.	287	399	344	332	329	311
12367	NM_001284409,NM_009810,XM_017312543,XM_030243266	Casp3	caspase 3	protein_coding	NP_001271338.1;NP_033940.1;XP_017168032.1;XP_030099126.1	107739	.	255	308	283	269	272	325
12368	NM_009811	Casp6	caspase 6	protein_coding	NP_033941.3	1312921	.	101	107	90	88	63	86
12369	NM_007611,XM_006526616	Casp7	caspase 7	protein_coding	NP_031637.1;XP_006526679.2	109383	.	70	91	57	80	70	65
12370	NM_001080126,NM_001277926,NM_009812,XM_006495634	Casp8	caspase 8	protein_coding	NP_001073595.1;NP_001264855.1;NP_033942.1;XP_006495697.1	1261423	.	91	141	85	127	70	110
12371	NM_001277932,NM_001355176,NM_015733	Casp9	caspase 9	protein_coding	NP_001264861.1;NP_001342105.1;NP_056548.2	1277950	.	1128	1127	1250	1185	1232	1061
12372	NM_009813	Casq1	calsequestrin 1	protein_coding	NP_033943.2	1309468	.	18	54	14	22	18	18
12373	NM_001355663,NM_009814	Casq2	calsequestrin 2	protein_coding	NP_001342592.1;NP_033944.2	1309469	.	90	89	72	57	63	60
12374	NM_013803,XM_006521729,XM_006521730,XM_006521731,XM_006521732,XM_006521735	Casr	calcium-sensing receptor	protein_coding	NP_038831.2;XP_006521792.1;XP_006521793.1;XP_006521794.1;XP_006521795.1;XP_006521798.1	1351351	.	11	23	22	19	16	17
12380	NM_001301153,NM_001301155,NM_001301156,NM_001301157,NM_001301158,NM_001301160,NM_001301181,NM_009817,XM_006517056,XM_006517059,XM_011244466,XM_011244467,XM_011244469,XM_017315374	Cast	calpastatin	protein_coding	NP_001288082.1;NP_001288084.1;NP_001288085.1;NP_001288086.1;NP_001288087.1;NP_001288089.1;NP_001288110.1;NP_033947.1;XP_006517119.1;XP_006517122.1;XP_011242768.1;XP_011242769.1;XP_011242771.1;XP_017170863.1	1098236	.	385	389	282	299	291	289
12385	NM_009818,XM_006525548,XM_030250299	Ctnna1	catenin (cadherin associated protein), alpha 1	protein_coding	NP_033948.1;XP_006525611.1;XP_030106159.1	88274	.	2782	3848	2613	2837	2392	3407
12386	NM_001109764,NM_001355193,NM_009819,NM_145732,XM_011241195	Ctnna2	catenin (cadherin associated protein), alpha 2	protein_coding	NP_001103234.1;NP_001342122.1;NP_033949.2;NP_663785.2;XP_011239497.1	88275	.	5103	4803	5578	5070	4874	3930
12387	NM_001165902,NM_007614	Ctnnb1	catenin (cadherin associated protein), beta 1	protein_coding	NP_001159374.1;NP_031640.1	88276	.	20407	23237	20975	22280	21161	20598
12388	NM_001085448,NM_001085449,NM_001085450,NM_001085453,NM_001355064,NM_001355065,NM_001355066,NM_001355067,NM_007615,XM_006498625,XM_006498626,XM_006498628,XM_006498630,XM_006498631,XM_006498632,XM_006498633,XM_006498634,XM_006498636,XM_006498638,XM_006498639,XM_017315179,XM_017315208,XM_030247016,XM_030247019	Ctnnd1	catenin (cadherin associated protein), delta 1	protein_coding	NP_001078917.1;NP_001078918.1;NP_001078919.1;NP_001078922.1;NP_001341993.1;NP_001341994.1;NP_001341995.1;NP_001341996.1;NP_031641.2;XP_006498688.1;XP_006498689.1;XP_006498691.1;XP_006498693.1;XP_006498694.1;XP_006498695.1;XP_006498696.1;XP_006498697.1;XP_006498699.1;XP_006498701.1;XP_006498702.1;XP_017170668.1;XP_017170697.1;XP_030102876.1;XP_030102879.1	105100	.	2990	3875	3391	3256	2848	3112
12389	NM_001243064,NM_007616,XM_006504974,XM_006504975,XM_006504976	Cav1	caveolin 1, caveolae protein	protein_coding	NP_001229993.1;NP_031642.1;XP_006505037.1;XP_006505038.1;XP_006505039.1	102709	.	525	837	595	587	433	661
12390	NM_001277756,NM_016900	Cav2	caveolin 2	protein_coding	NP_001264685.1;NP_058596.1	107571	.	808	1085	873	906	834	1093
12391	NM_007617	Cav3	caveolin 3	protein_coding	NP_031643.1	107570	.	9	14	19	7	26	13
12393	NM_001145920,NM_001146038,NM_001271627,NM_001271630,NM_001271631,NM_009820,NR_073392,NR_073425	Runx2	runt related transcription factor 2	protein_coding	NP_001139392.1;NP_001139510.1;NP_001258556.1;NP_001258559.1;NP_001258560.1;NP_033950.2	99829	.	297	312	391	364	358	317
12394	NM_001111021,NM_001111022,NM_001111023,NM_009821	Runx1	runt related transcription factor 1	protein_coding	NP_001104491.1;NP_001104492.1;NP_001104493.1;NP_033951.2	99852	.	31	56	28	64	34	54
12395	NM_001111026,NM_001111027,NM_009822,XM_006537568,XM_006537569,XM_006537571,XM_006537572,XM_030253116,XM_030253117,XM_030253118,XM_030253119,XM_030253120,XM_030253121	Runx1t1	RUNX1 translocation partner 1	protein_coding	NP_001104496.1;NP_001104497.1;NP_033952.1;XP_006537631.1;XP_006537632.1;XP_006537634.1;XP_006537635.1;XP_030108976.1;XP_030108977.1;XP_030108978.1;XP_030108979.1;XP_030108980.1;XP_030108981.1	104793	.	779	556	797	783	782	727
12396	NM_001285446,NM_009823,NM_172860,XM_006498640,XM_006498641,XM_006498642,XM_011239268,XM_030247023	Cbfa2t2	CBFA2/RUNX1 translocation partner 2	protein_coding	NP_001272375.1;NP_033953.1;NP_766448.1;XP_006498703.1;XP_006498704.1;XP_006498705.1;XP_011237570.1;XP_030102883.1	1333833	.	2684	2665	2692	2796	2578	2368
12397	gene-Cbfa2t2-ps1	Cbfa2t2-ps1	CBFA2/RUNX1 translocation partner 2, pseudogene 1	pseudogene	.	1333788	.	6	4	3	4	6	3
12398	NM_001109873,NM_009824,NM_177289,XM_011248289,XM_011248291,XM_011248292,XM_011248293,XM_017312544,XM_017312547,XM_030243267,XM_030243268,XM_030243269,XM_030243270,XM_030243271	Cbfa2t3	CBFA2/RUNX1 translocation partner 3	protein_coding	NP_001103343.1;NP_033954.2;NP_796263.1;XP_011246591.2;XP_011246593.1;XP_011246594.1;XP_011246595.1;XP_017168033.1;XP_017168036.1;XP_030099127.1;XP_030099128.1;XP_030099129.1;XP_030099130.1;XP_030099131.1	1338013	.	1238	1299	1431	1495	1438	1469
12399	NM_001369050,NM_019732,XM_006538506	Runx3	runt related transcription factor 3	protein_coding	NP_001355979.1;NP_062706.2;XP_006538569.1	102672	.	0	4	0	0	0	2
12400	NM_001161456,NM_001161457,NM_001161458,NM_022309	Cbfb	core binding factor beta	protein_coding	NP_001154928.1;NP_001154929.1;NP_001154930.1;NP_071704.3	99851	.	870	1207	764	974	794	1003
12401	NM_007618	Serpina6	serine (or cysteine) peptidase inhibitor, clade A, member 6	protein_coding	NP_031644.1	88278	.	0	0	0	0	0	0
12402	NM_007619,XM_006509963,XM_017313115,XM_030244033	Cbl	Casitas B-lineage lymphoma	protein_coding	NP_031645.2;XP_006510026.1;XP_017168604.1;XP_030099893.1	88279	.	3524	4034	4107	3912	3402	3802
12404	NM_019626	Cbln1	cerebellin 1 precursor protein	protein_coding	NP_062600.2	88281	.	76	87	119	92	113	79
12405	NM_001302356,NM_001361142,NM_001361143,NM_001361144,NM_001361145,NM_172633	Cbln2	cerebellin 2 precursor protein	protein_coding	NP_001289285.1;NP_001348071.1;NP_001348072.1;NP_001348073.1;NP_001348074.1;NP_766221.1	88282	.	127	109	179	133	185	152
12406	NM_001111043,NM_001111044,NM_001285776,NM_009825,XM_006507278,XM_006507279	Serpinh1	serine (or cysteine) peptidase inhibitor, clade H, member 1	protein_coding	NP_001104513.1;NP_001104514.1;NP_001272705.1;NP_033955.2;XP_006507341.1;XP_006507342.1	88283	.	686	894	685	576	584	803
12408	NM_007620	Cbr1	carbonyl reductase 1	protein_coding	NP_031646.2	88284	.	1557	1646	1640	1670	1743	1551
12409	NM_007621,XM_006532096	Cbr2	carbonyl reductase 2	protein_coding	NP_031647.1;XP_006532159.1	107200	.	18	22	16	12	5	9
12411	NM_001271353,NM_144855,NM_178224,XM_006523549,XM_006523550,XM_006523551	Cbs	cystathionine beta-synthase	protein_coding	NP_001258282.1;NP_659104.1;NP_835742.1;XP_006523612.1;XP_006523613.1;XP_006523614.1	88285	.	985	1551	1166	1210	1013	1305
12412	NM_001362560,NM_001362561,NM_001362563,NM_001362564,NM_007622,NR_155761,XM_006532102,XM_017314242,XR_003949267,XR_003949268,XR_003949269	Cbx1	chromobox 1	protein_coding	NP_001349489.1;NP_001349490.1;NP_001349492.1;NP_001349493.1;NP_031648.1;XP_006532165.1;XP_017169731.1	105369	.	1006	1204	1180	1141	1158	1263
12416	NM_007623,XM_006532103,XM_006532104,XM_006532105	Cbx2	chromobox 2	protein_coding	NP_031649.2;XP_006532166.1;XP_006532167.1;XP_006532168.1	88289	.	63	74	81	79	68	74
12417	NM_001355002,NM_007624,XM_017321374	Cbx3	chromobox 3	protein_coding	NP_001341931.1;NP_031650.3;XP_017176863.1	108515	.	3593	3704	3313	3493	3495	3816
12418	NM_007625	Cbx4	chromobox 4	protein_coding	NP_031651.2	1195985	.	1557	1719	1797	1742	1635	1395
12419	NM_001076789,NM_001110216,NM_001358950,NM_007626,XM_006520372,XM_006520374,XM_006520375,XM_006520376,XM_006520377,XM_030248308	Cbx5	chromobox 5	protein_coding	NP_001070257.1;NP_001103686.1;NP_001345879.1;NP_031652.1;XP_006520435.1;XP_006520437.1;XP_006520438.1;XP_006520439.1;XP_006520440.1;XP_030104168.1	109372	.	8378	9331	8877	8973	8875	9459
12421	NM_009826,XM_006495443,XM_011238338,XM_011238339,XM_011238340,XM_011238341	Rb1cc1	RB1-inducible coiled-coil 1	protein_coding	NP_033956.2;XP_006495506.1;XP_011236640.1;XP_011236641.1;XP_011236642.1;XP_011236643.1	1341850	.	4272	4099	4300	4178	3943	3761
12424	NM_001284508,NM_031161,XM_017313116	Cck	cholecystokinin	protein_coding	NP_001271437.1;NP_112438.1;XP_017168605.1	88297	.	6679	5455	8463	7783	7476	6025
12425	NM_001347354,NM_009827	Cckar	cholecystokinin A receptor	protein_coding	NP_001334283.1;NP_033957.1	99478	.	0	3	0	0	0	0
12426	NM_007627,XM_006507280,XM_006507281	Cckbr	cholecystokinin B receptor	protein_coding	NP_031653.1;XP_006507343.1;XP_006507344.1	99479	.	258	163	249	191	184	119
12427	NM_001305221,NM_007628,XM_006500949,XM_006500950,XM_006500951,XM_006500952,XM_006500954,XM_030252399,XM_030252400,XM_030252401,XM_030252402,XR_003954275	Ccna1	cyclin A1	protein_coding	NP_001292150.1;NP_031654.2;XP_006501012.1;XP_006501013.1;XP_006501014.1;XP_006501015.1;XP_006501017.1;XP_030108259.1;XP_030108260.1;XP_030108261.1;XP_030108262.1	108042	.	63	36	67	41	67	54
12428	NM_009828	Ccna2	cyclin A2	protein_coding	NP_033958.2	108069	.	31	55	48	31	12	11
12442	NM_007630	Ccnb2	cyclin B2	protein_coding	NP_031656.2	88311	.	8	15	8	6	4	5
12443	NM_001379248,NM_007631	Ccnd1	cyclin D1	protein_coding	NP_001366177.1;NP_031657.1	88313	.	2056	2079	2042	2353	2313	2929
12444	NM_009829,XM_006505459,XM_006505460	Ccnd2	cyclin D2	protein_coding	NP_033959.1;XP_006505522.1;XP_006505523.1	88314	.	4434	4854	4206	4588	4369	3305
12445	NM_001081635,NM_001081636,NM_007632,XM_006523552,XM_006523553,XM_011246262	Ccnd3	cyclin D3	protein_coding	NP_001075104.1;NP_001075105.1;NP_031658.1;XP_006523615.1;XP_006523616.1;XP_011244564.1	88315	.	884	913	815	867	907	912
12447	NM_007633	Ccne1	cyclin E1	protein_coding	NP_031659.2	88316	.	511	428	503	537	506	392
12448	NM_001037134,NM_001282943,NM_009830,XM_006537573,XM_006537574,XM_006537575,XM_011249913	Ccne2	cyclin E2	protein_coding	NP_001032211.1;NP_001269872.1;NP_033960.1;XP_006537636.1;XP_006537637.1;XP_006537638.1;XP_011248215.1	1329034	.	76	99	66	78	74	109
12449	NM_007634,XM_006523554	Ccnf	cyclin F	protein_coding	NP_031660.3;XP_006523617.1	102551	.	219	217	223	211	202	163
12450	NM_009831,XR_003949271	Ccng1	cyclin G1	protein_coding	NP_033961.1	102890	.	3264	3174	3333	3182	3076	3271
12452	NM_007635	Ccng2	cyclin G2	protein_coding	NP_031661.3	1095734	.	1777	1700	1911	1892	1860	1801
12453	NM_017367,XM_006534736,XM_030254086	Ccni	cyclin I	protein_coding	NP_059063.2;XP_006534799.1;XP_030109946.1	1341077	.	8952	9342	9213	9010	8823	8441
12454	NM_009832,XM_006515443,XM_006515444,XM_006515445	Ccnk	cyclin K	protein_coding	NP_033962.2;XP_006515506.1;XP_006515507.1;XP_006515508.1	1276106	.	919	1023	933	978	891	885
12455	NM_001368702,NM_009833,NR_160872	Ccnt1	cyclin T1	protein_coding	NP_001355631.1;NP_033963.1	1328363	.	1976	2152	1997	1962	1881	1884
12457	NM_009834,XM_006500956	Noct	nocturnin	protein_coding	NP_033964.1;XP_006501019.1	109382	.	3227	3140	3380	3399	3423	2722
12458	NM_001190333,NM_001190334,NM_001190335,NM_001190336,NM_001190337,NM_001190338,NM_009835,XM_006523286,XM_006523288,XM_006523291,XM_006523292,XM_011246186,XM_011246188,XM_017317218,XM_017317219,XM_017317220	Ccr6	chemokine (C-C motif) receptor 6	protein_coding	NP_001177262.1;NP_001177263.1;NP_001177264.1;NP_001177265.1;NP_001177266.1;NP_001177267.1;NP_033965.1;XP_006523349.1;XP_006523351.1;XP_006523354.1;XP_006523355.1;XP_011244488.1;XP_011244490.1;XP_017172707.1;XP_017172708.1;XP_017172709.1	1333797	.	0	4	0	0	0	0
12460	NM_016892,XR_003952739	Ccs	copper chaperone for superoxide dismutase	protein_coding	NP_058588.1	1333783	.	493	598	488	513	477	554
12461	NM_001358767,NM_007636	Cct2	chaperonin containing Tcp1, subunit 2 (beta)	protein_coding	NP_001345696.1;NP_031662.2	107186	.	6487	6994	6423	6783	6782	6202
12462	NM_009836	Cct3	chaperonin containing Tcp1, subunit 3 (gamma)	protein_coding	NP_033966.1	104708	.	4713	5519	4992	5103	5025	4815
12464	NM_009837	Cct4	chaperonin containing Tcp1, subunit 4 (delta)	protein_coding	NP_033967.1	104689	.	4157	4562	4137	4522	4567	4539
12465	NM_001348035,NM_007637	Cct5	chaperonin containing Tcp1, subunit 5 (epsilon)	protein_coding	NP_001334964.1;NP_031663.1	107185	.	7477	8587	7913	8391	8002	7422
12466	NM_009838	Cct6a	chaperonin containing Tcp1, subunit 6a (zeta)	protein_coding	NP_033968.1	107943	.	7077	7405	6785	7218	7309	6599
12467	NM_001291242,NM_009839,XM_006532107,XM_006532108,XM_030245508,XR_001779867,XR_003949272,XR_879512	Cct6b	chaperonin containing Tcp1, subunit 6b (zeta)	protein_coding	NP_001278171.1;NP_033969.2;XP_006532170.1;XP_006532171.1;XP_030101368.1	1329013	.	0	8	10	0	0	6
12468	NM_007638	Cct7	chaperonin containing Tcp1, subunit 7 (eta)	protein_coding	NP_031664.3	107184	.	7498	8163	7958	8373	8450	8213
12469	NM_009840	Cct8	chaperonin containing Tcp1, subunit 8 (theta)	protein_coding	NP_033970.3	107183	.	7203	7660	7042	7408	7631	7743
12475	NM_009841	Cd14	CD14 antigen	protein_coding	NP_033971.1	88318	.	94	199	108	151	96	149
12476	NM_001111049,NM_001111050,NM_009842	Cd151	CD151 antigen	protein_coding	NP_001104519.1;NP_001104520.1;NP_033972.2	1096360	.	779	1190	782	925	679	976
12477	NM_001281976,NM_009843	Ctla4	cytotoxic T-lymphocyte-associated protein 4	protein_coding	NP_001268905.1;NP_033973.2	88556	.	0	2	0	0	0	0
12478	NM_001357091,NM_009844,XM_006507283,XM_030242039,XM_030242040,XM_030242041,XM_030242042	Cd19	CD19 antigen	protein_coding	NP_001344020.1;NP_033974.2;XP_006507346.1;XP_030097899.1;XP_030097900.1;XP_030097901.1;XP_030097902.1	88319	.	0	0	0	0	0	0
12479	NM_001379501,NM_001379502,NM_001379503,NM_007639,NR_166722,XM_030252403,XM_030252404	Cd1d1	CD1d1 antigen	protein_coding	NP_001366430.1;NP_001366431.1;NP_001366432.1;NP_031665.2;XP_030108263.1;XP_030108264.1	107674	.	14	22	17	23	11	12
12480	NR_038188	Cd1d2	CD1d2 antigen	transcribed_pseudogene	.	107675	.	0	0	0	0	0	0
12481	NM_013486	Cd2	CD2 antigen	protein_coding	NP_038514.1	88320	.	2	14	0	0	0	4
12482	NM_007641	Ms4a1	membrane-spanning 4-domains, subfamily A, member 1	protein_coding	NP_031667.1	88321	.	0	0	0	0	0	0
12483	NM_001043317,NM_009845,NR_102722,NR_102723,XM_006539489,XM_006539490,XM_006539491,XM_006539492,XM_006539493,XM_006539494,XM_030242043,XR_391039	Cd22	CD22 antigen	protein_coding	NP_001036782.1;NP_033975.3;XP_006539552.1;XP_006539553.1;XP_006539554.1;XP_006539555.1;XP_006539556.1;XP_006539557.1;XP_030097903.1	88322	.	13	38	10	10	17	31
12484	NM_009846	Cd24a	CD24a antigen	protein_coding	NP_033976.1	88323	.	548	892	535	528	602	917
12487	NM_007642	Cd28	CD28 antigen	protein_coding	NP_031668.3	88327	.	0	3	0	4	0	8
12488	NM_009847,XM_011246263,XM_011246264,XM_011246265,XR_001782031	Cd2ap	CD2-associated protein	protein_coding	NP_033977.3;XP_011244565.1;XP_011244566.1;XP_011244567.1	1330281	.	685	809	585	689	530	660
12489	NM_001111058,NM_021293,XM_006540590	Cd33	CD33 antigen	protein_coding	NP_001104528.1;NP_067268.1;XP_006540653.1	99440	.	140	231	157	156	110	171
12490	NM_001111059,NM_133654	Cd34	CD34 antigen	protein_coding	NP_001104529.1;NP_598415.1	88329	.	1837	1843	2104	2377	2200	2555
12491	NM_001159555,NM_001159556,NM_001159557,NM_001159558,NM_007643,XM_006535620,XM_006535621,XM_006535622,XM_006535623,XM_006535624,XM_006535625,XM_030254088	Cd36	CD36 molecule	protein_coding	NP_001153027.1;NP_001153028.1;NP_001153029.1;NP_001153030.1;NP_031669.3;XP_006535683.1;XP_006535684.1;XP_006535685.1;XP_006535686.1;XP_006535687.1;XP_006535688.1;XP_030109948.1	107899	.	33	21	14	12	38	78
12492	NM_007644	Scarb2	scavenger receptor class B, member 2	protein_coding	NP_031670.1	1196458	.	7331	11188	7789	8046	6438	9088
12493	NM_001290802,NM_001290804,NM_007645,XM_006540592,XM_006540593	Cd37	CD37 antigen	protein_coding	NP_001277731.1;NP_001277733.1;NP_031671.1;XP_006540655.1;XP_006540656.1	88330	.	101	199	122	166	104	136
12494	NM_007646	Cd38	CD38 antigen	protein_coding	NP_031672.2	107474	.	396	554	394	445	383	570
12495	NM_001304721,NM_009848,XM_006526618,XM_006526619,XM_006526620,XM_017318047	Entpd1	ectonucleoside triphosphate diphosphohydrolase 1	protein_coding	NP_001291650.1;NP_033978.1;XP_006526681.1;XP_006526682.1;XP_006526683.1;XP_017173536.1	102805	.	469	771	545	648	447	759
12496	NM_009849	Entpd2	ectonucleoside triphosphate diphosphohydrolase 2	protein_coding	NP_033979.2	1096863	.	374	729	495	502	437	523
12497	NM_001355068,NM_001370629,NM_001370630,NM_001370631,NM_172117,XM_017315214,XM_030247027,XM_030247029,XM_030247031,XR_003950191	Entpd6	ectonucleoside triphosphate diphosphohydrolase 6	protein_coding	NP_001341997.1;NP_001357558.1;NP_001357559.1;NP_001357560.1;NP_742115.2;XP_017170703.1;XP_030102887.1;XP_030102889.1;XP_030102891.1	1202295	.	2445	2581	2689	2817	2912	2326
12499	NM_001026214,NM_001286049,NM_001286058,NM_007647,XM_030246533	Entpd5	ectonucleoside triphosphate diphosphohydrolase 5	protein_coding	NP_001021385.1;NP_001272978.1;NP_001272987.1;NP_031673.2;XP_030102393.1	1321385	.	1559	2237	1646	1661	1523	1829
12500	NM_013487,XM_006509965	Cd3d	CD3 antigen, delta polypeptide	protein_coding	NP_038515.3;XP_006510028.1	88331	.	0	5	0	0	0	0
12501	NM_007648,XM_006509966	Cd3e	CD3 antigen, epsilon polypeptide	protein_coding	NP_031674.1;XP_006510029.1	88332	.	0	8	0	0	0	3
12502	NM_009850	Cd3g	CD3 antigen, gamma polypeptide	protein_coding	NP_033980.1	88333	.	11	12	0	0	0	7
12503	NM_001113391,NM_001113392,NM_001113393,NM_031162,NR_103716,XM_011238745,XM_011238746,XM_017313285	Cd247	CD247 antigen	protein_coding	NP_001106862.1;NP_001106863.1;NP_001106864.2;NP_112439.1;XP_011237047.1;XP_011237048.1;XP_017168774.1	88334	.	0	3	7	0	1	8
12504	NM_013488,XM_006505461,XM_006505462	Cd4	CD4 antigen	protein_coding	NP_038516.1;XP_006505524.1;XP_006505525.1	88335	.	10	18	7	12	10	18
12505	NM_001039150,NM_001039151,NM_001177785,NM_001177786,NM_001177787,NM_009851,XM_006498645,XM_006498646,XM_006498647,XM_006498648,XM_006498649	Cd44	CD44 antigen	protein_coding	NP_001034239.1;NP_001034240.1;NP_001171256.1;NP_001171257.1;NP_001171258.1;NP_033981.2;XP_006498708.1;XP_006498709.1;XP_006498710.1;XP_006498711.1;XP_006498712.1	88338	.	121	350	142	186	182	390
12506	NM_001360767,NM_007649,XM_006496636,XM_006496637,XM_030244776	Cd48	CD48 antigen	protein_coding	NP_001347696.1;NP_031675.1;XP_006496699.1;XP_006496700.1;XP_030100636.1	88339	.	17	54	22	31	13	63
12507	NM_007650,XM_006526621	Cd5	CD5 antigen	protein_coding	NP_031676.3;XP_006526684.1	88340	.	0	0	0	7	0	0
12508	NM_007651	Cd53	CD53 antigen	protein_coding	NP_031677.1	88341	.	299	571	311	432	306	499
12509	NM_001111060,NM_007652,XM_006498650,XM_006498651,XM_030247036	Cd59a	CD59a antigen	protein_coding	NP_001104530.1;NP_031678.1;XP_006498713.1;XP_006498714.1;XP_030102896.1	109177	.	391	214	192	176	144	202
12511	NM_001037801,NM_009852,XM_006526622	Cd6	CD6 antigen	protein_coding	NP_001032890.1;NP_033982.3;XP_006526685.1	103566	.	10	14	4	8	0	9
12512	NM_001042580,NM_001282966,NM_007653,XM_030244851,XM_030244852	Cd63	CD63 antigen	protein_coding	NP_001036045.1;NP_001269895.1;NP_031679.1;XP_030100711.1;XP_030100712.1	99529	.	1849	3108	1752	1960	1475	2488
12514	NM_001291058,NR_110993	Cd68	CD68 antigen	protein_coding	NP_001277987.1	88342	.	237	520	286	375	253	372
12515	NM_001033122,XM_006505463	Cd69	CD69 antigen	protein_coding	NP_001028294.1;XP_006505526.1	88343	.	0	0	0	0	0	3
12516	NM_009854	Cd7	CD7 antigen	protein_coding	NP_033984.1	88344	.	0	0	0	0	2	0
12517	NM_001110320,NM_001110321,NM_001110322,NM_007654,XM_006537576,XM_006537577,XM_006537578,XM_006537579,XM_006537580,XM_006537581,XM_006537582,XM_030253123,XM_030253124,XM_030253125,XM_030253126,XM_030253127,XM_030253128,XM_030253129,XM_030253130,XM_030253131	Cd72	CD72 antigen	protein_coding	NP_001103790.1;NP_001103791.1;NP_001103792.1;NP_031680.2;XP_006537639.1;XP_006537640.1;XP_006537641.1;XP_006537642.1;XP_006537643.1;XP_006537644.1;XP_006537645.1;XP_030108983.1;XP_030108984.1;XP_030108985.1;XP_030108986.1;XP_030108987.1;XP_030108988.1;XP_030108989.1;XP_030108990.1;XP_030108991.1	88345	.	4	8	2	7	5	9
12518	NM_007655	Cd79a	CD79A antigen (immunoglobulin-associated alpha)	protein_coding	NP_031681.2	101774	.	0	0	2	3	5	2
12519	NM_001359898,NM_009855,XM_006521737,XM_030248944,XM_030248945	Cd80	CD80 antigen	protein_coding	NP_001346827.1;NP_033985.3;XP_006521800.1;XP_030104804.1;XP_030104805.1	101775	.	20	14	22	10	21	31
12520	NM_133655	Cd81	CD81 antigen	protein_coding	NP_598416.1	1096398	.	10476	15856	11742	12666	10443	12361
12521	NM_001136055,NM_001271430,NM_001271431,NM_001271432,NM_001271461,NM_001271462,NM_007656,XM_030247042	Cd82	CD82 antigen	protein_coding	NP_001129527.1;NP_001258359.1;NP_001258360.1;NP_001258361.1;NP_001258390.1;NP_001258391.1;NP_031682.1;XP_030102902.1	104651	.	1251	1971	1185	1162	806	1101
12522	NM_001289915,NM_009856	Cd83	CD83 antigen	protein_coding	NP_001276844.1;NP_033986.1	1328316	.	651	800	860	807	749	669
12523	NM_001252472,NM_001289470,NM_013489,XM_011238747,XM_030244793	Cd84	CD84 antigen	protein_coding	NP_001239401.1;NP_001276399.1;NP_038517.1;XP_011237049.1;XP_030100653.1	1336885	.	125	306	145	180	149	245
12524	NM_019388,XM_006521741,XM_011245812,XR_003951744,XR_384517	Cd86	CD86 antigen	protein_coding	NP_062261.3;XP_006521804.1;XP_011244114.1	101773	.	77	171	88	115	79	138
12525	NM_001081110,NM_009857	Cd8a	CD8 antigen, alpha chain	protein_coding	NP_001074579.1;NP_033987.1	88346	.	2	11	3	10	7	13
12526	NM_009858	Cd8b1	CD8 antigen, beta chain 1	protein_coding	NP_033988.1	88347	.	0	0	0	5	0	5
12527	NM_007657	Cd9	CD9 antigen	protein_coding	NP_031683.1	88348	.	2297	3999	2318	2506	1707	2884
12530	NM_007658,XM_006511929,XM_006511930,XM_006511931	Cdc25a	cell division cycle 25A	protein_coding	NP_031684.3;XP_006511992.1;XP_006511993.1;XP_006511994.1	103198	.	249	199	215	236	228	264
12531	NM_001111075,NM_023117,XR_374398	Cdc25b	cell division cycle 25B	protein_coding	NP_001104545.1;NP_075606.1	99701	.	232	258	289	288	282	256
12532	NM_009860,XM_006525551,XM_011246819	Cdc25c	cell division cycle 25C	protein_coding	NP_033990.2;XP_006525614.1;XP_011245121.1	88350	.	3	17	5	3	6	6
12534	NM_007659	Cdk1	cyclin-dependent kinase 1	protein_coding	NP_031685.2	88351	.	20	20	13	11	14	26
12537	NM_001347308,NM_001355567,NM_001355568,NM_001355569,NM_007661,XM_006538508,XM_006538511,XM_017319932,XM_030253132,XM_030253133,XM_030253134,XM_030253135,XM_030253136,XM_030253137,XM_030253138,XR_001784083,XR_001784084	Cdk11b	cyclin-dependent kinase 11B	protein_coding	NP_001334237.1;NP_001342496.1;NP_001342497.1;NP_001342498.1;NP_031687.2;XP_006538571.1;XP_006538574.1;XP_017175421.1;XP_030108992.1;XP_030108993.1;XP_030108994.1;XP_030108995.1;XP_030108996.1;XP_030108997.1;XP_030108998.1	88353	.	2672	2647	2749	2728	2623	2686
12539	NM_001378796,NM_016742	Cdc37	cell division cycle 37	protein_coding	NP_001365725.1;NP_058022.1	109531	.	4187	4620	5075	4914	4766	4252
12540	NM_001243769,NM_009861,XM_030253139,XM_030253140,XM_030253141,XM_030253142	Cdc42	cell division cycle 42	protein_coding	NP_001230698.1;NP_033991.1;XP_030108999.1;XP_030109000.1;XP_030109001.1;XP_030109002.1	106211	.	11218	13102	11298	12043	11453	10788
12544	NM_001161623,NM_001358206,NM_009862,XM_006521744	Cdc45	cell division cycle 45	protein_coding	NP_001155095.1;NP_001345135.1;NP_033992.2;XP_006521807.1	1338073	.	63	85	62	54	76	68
12545	NM_001271566,NM_001271567,NM_001271568,NM_009863,XM_006534737,XM_017320634,XM_030254089	Cdc7	cell division cycle 7 (S. cerevisiae)	protein_coding	NP_001258495.1;NP_001258496.1;NP_001258497.1;NP_033993.2;XP_006534800.1;XP_017176123.1;XP_030109949.1	1309511	.	166	148	136	122	179	128
12549	NM_020260	Arhgap31	Rho GTPase activating protein 31	protein_coding	NP_064656.2	1333857	.	1370	1863	1419	1494	1332	1886
12550	NM_009864	Cdh1	cadherin 1	protein_coding	NP_033994.1	88354	.	27	26	16	20	5	26
12552	NM_009866,XM_006530624,XM_006530626,XM_030243272	Cdh11	cadherin 11	protein_coding	NP_033996.4;XP_006530687.1;XP_006530689.1;XP_030099132.1	99217	.	4008	3895	4016	3936	3668	3215
12554	NM_019707,XM_006530628,XM_011248295,XM_017312550	Cdh13	cadherin 13	protein_coding	NP_062681.2;XP_006530691.2;XP_011246597.1;XP_017168039.1	99551	.	1789	1730	1823	1699	1964	1583
12555	NM_007662	Cdh15	cadherin 15	protein_coding	NP_031688.2	106672	.	67	67	58	76	80	66
12556	NM_001252627,NM_001252628,NM_007663,XM_006530629	Cdh16	cadherin 16	protein_coding	NP_001239556.1;NP_001239557.1;NP_031689.1;XP_006530692.1	106671	.	0	0	0	0	0	0
12557	NM_019753,XM_006537583,XM_006537584	Cdh17	cadherin 17	protein_coding	NP_062727.1;XP_006537646.1;XP_006537647.1	1095414	.	0	0	0	0	0	0
12558	NM_007664,XM_006525553	Cdh2	cadherin 2	protein_coding	NP_031690.3;XP_006525616.1	88355	.	5096	5894	5517	5628	5244	4991
12560	NM_001037809,NM_007665	Cdh3	cadherin 3	protein_coding	NP_001032898.1;NP_031691.1	88356	.	48	0	0	0	0	7
12561	NM_001316723,NM_009867,XM_011239921,XM_030247044,XM_030247045	Cdh4	cadherin 4	protein_coding	NP_001303652.1;NP_033997.1;XP_011238223.1;XP_030102904.1;XP_030102905.1	99218	.	357	304	393	355	344	408
12562	NM_009868,XM_006530630	Cdh5	cadherin 5	protein_coding	NP_033998.2;XP_006530693.1	105057	.	475	618	454	523	375	468
12563	NM_007666,XM_006520017,XM_006520018,XM_017316420,XM_017316421	Cdh6	cadherin 6	protein_coding	NP_031692.2;XP_006520080.1;XP_006520081.1;XP_017171909.1;XP_017171910.1	107435	.	471	264	486	272	352	412
12564	NM_001039154,NM_001285913,NM_001285914,NM_007667,NR_133570,XM_006530631,XM_006530634,XM_017312551,XM_030243274	Cdh8	cadherin 8	protein_coding	NP_001034243.1;NP_001272842.1;NP_001272843.1;NP_031693.2;XP_006530694.1;XP_006530697.1;XP_017168040.1;XP_030099134.1	107434	.	4333	4083	4414	4047	3565	2643
12565	NM_009869,XM_006520020,XM_011245337	Cdh9	cadherin 9	protein_coding	NP_033999.1;XP_006520083.1;XP_011243639.1	107433	.	1331	1437	1618	1668	1498	1010
12566	NM_016756,NM_183417,XM_006513162,XM_011243321,XM_030244853,XM_030244854	Cdk2	cyclin-dependent kinase 2	protein_coding	NP_058036.1;NP_904326.1;XP_006513225.1;XP_011241623.1;XP_030100713.1;XP_030100714.1	104772	.	53	67	60	49	47	51
12567	NM_001355005,NM_009870	Cdk4	cyclin-dependent kinase 4	protein_coding	NP_001341934.1;NP_034000.1	88357	.	1326	1616	1380	1603	1412	1307
12568	NM_007668,NR_156449,XM_006535626	Cdk5	cyclin-dependent kinase 5	protein_coding	NP_031694.1;XP_006535689.1	101765	.	2570	2812	3041	2901	2955	2413
12569	NM_009871	Cdk5r1	cyclin-dependent kinase 5, regulatory subunit 1 (p35)	protein_coding	NP_034001.1	101764	.	8312	8161	10000	9724	9184	8010
12570	NM_009872	Cdk5r2	cyclin-dependent kinase 5, regulatory subunit 2 (p39)	protein_coding	NP_034002.2	1330828	.	5342	4581	7010	6075	6119	5372
12571	NM_009873,XM_030254091	Cdk6	cyclin-dependent kinase 6	protein_coding	NP_034003.1;XP_030109951.1	1277162	.	53	82	65	87	64	72
12572	NM_009874	Cdk7	cyclin-dependent kinase 7	protein_coding	NP_034004.2	102956	.	2348	2342	2395	2433	2081	2287
12575	NM_001111099,NM_007669	Cdkn1a	cyclin-dependent kinase inhibitor 1A (P21)	protein_coding	NP_001104569.1;NP_031695.1	104556	.	351	402	404	453	360	424
12576	NM_009875	Cdkn1b	cyclin-dependent kinase inhibitor 1B	protein_coding	NP_034005.2	104565	.	1063	1397	1108	1175	1026	1222
12577	NM_001161624,NM_001354981,NM_009876,XM_006508467,XM_006508468,XM_006508469,XM_006508470,XM_030242044,XM_030242045,XM_030242046,XM_030242047,XM_030242048	Cdkn1c	cyclin-dependent kinase inhibitor 1C (P57)	protein_coding	NP_001155096.1;NP_001341910.1;NP_034006.3;XP_006508530.1;XP_006508531.1;XP_006508532.1;XP_006508533.1;XP_030097904.1;XP_030097905.1;XP_030097906.1;XP_030097907.1;XP_030097908.1	104564	.	257	119	96	107	105	154
12578	NM_001040654,NM_009877	Cdkn2a	cyclin dependent kinase inhibitor 2A	protein_coding	NP_001035744.1;NP_034007.1	104738	.	9	0	8	5	3	0
12579	NM_007670	Cdkn2b	cyclin dependent kinase inhibitor 2B	protein_coding	NP_031696.1	104737	.	23	34	27	32	11	36
12580	NM_001301368,NM_007671	Cdkn2c	cyclin dependent kinase inhibitor 2C	protein_coding	NP_001288297.1;NP_031697.1	105388	.	68	134	103	102	58	138
12581	NM_009878,XM_006509968	Cdkn2d	cyclin dependent kinase inhibitor 2D	protein_coding	NP_034008.2;XP_006510031.1	105387	.	1238	1514	1602	1480	1494	1186
12583	NM_033037,NR_151681	Cdo1	cysteine dioxygenase 1, cytosolic	protein_coding	NP_149026.1	105925	.	729	694	714	797	667	699
12585	NM_001354986,NM_007672	Cdr2	cerebellar degeneration-related 2	protein_coding	NP_001341915.1;NP_031698.2	1100885	.	692	775	540	509	401	522
12587	NM_019394	Mia	melanoma inhibitory activity	protein_coding	NP_062267.2	109615	.	107	185	78	74	90	117
12589	NM_001358917,NM_001358918,NM_001358919,NM_009879,XM_006530128,XM_011248162,XM_030254092,XM_030254093,XR_003955576	Ift81	intraflagellar transport 81	protein_coding	NP_001345846.1;NP_001345847.1;NP_001345848.1;NP_034009.2;XP_006530191.1;XP_011246464.1;XP_030109952.1;XP_030109953.1	1098597	.	961	1287	1078	1200	1163	1197
12590	NM_009880	Cdx1	caudal type homeobox 1	protein_coding	NP_034010.3	88360	.	0	0	0	0	0	0
12591	NM_007673	Cdx2	caudal type homeobox 2	protein_coding	NP_031699.2	88361	.	0	0	0	0	0	0
12592	NM_007674	Cdx4	caudal type homeobox 4	protein_coding	NP_031700.1	88362	.	0	0	0	0	0	0
12593	NM_001123386,NM_001378941,NM_001378942,NM_009881,NR_166191,XR_382045	Cdyl	chromodomain protein, Y chromosome-like	protein_coding	NP_001116858.1;NP_001365870.1;NP_001365871.1;NP_034011.1	1339956	.	329	462	279	376	313	303
12606	NM_001287514,NM_001287515,NM_001287521,NM_001287523,NM_007678	Cebpa	CCAAT/enhancer binding protein (C/EBP), alpha	protein_coding	NP_001274443.1;NP_001274444.1;NP_001274450.1;NP_001274452.1;NP_031704.2	99480	.	670	1101	801	840	664	873
12607	NM_001024806,XM_006523558	Cebpz	CCAAT/enhancer binding protein zeta	protein_coding	NP_001019977.1;XP_006523621.1	109386	.	1669	2076	1783	1804	1762	1871
12608	NM_001287738,NM_001287739,NM_009883	Cebpb	CCAAT/enhancer binding protein (C/EBP), beta	protein_coding	NP_001274667.1;NP_001274668.1;NP_034013.1	88373	.	190	214	251	259	201	224
12609	NM_007679	Cebpd	CCAAT/enhancer binding protein (C/EBP), delta	protein_coding	NP_031705.3	103573	.	217	351	324	335	252	275
12611	NM_009884	Cebpg	CCAAT/enhancer binding protein (C/EBP), gamma	protein_coding	NP_034014.1	104982	.	1354	1637	1459	1514	1573	1642
12613	NM_009885	Cel	carboxyl ester lipase	protein_coding	NP_034015.1	88374	.	0	0	0	0	0	0
12614	NM_009886,XM_006520379,XM_006520380,XM_006520381,XM_006520382,XM_030248310	Celsr1	cadherin, EGF LAG seven-pass G-type receptor 1	protein_coding	NP_034016.2;XP_006520442.1;XP_006520443.1;XP_006520444.1;XP_006520445.1;XP_030104170.1	1100883	.	489	870	571	547	400	643
12615	NM_001302129,NM_001302130,NM_001302131,NM_001302132,NM_007681,NR_126074,XM_011240699,XM_030254094	Cenpa	centromere protein A	protein_coding	NP_001289058.1;NP_001289059.1;NP_001289060.1;NP_001289061.1;NP_031707.1;XP_011239001.1;XP_030109954.1	88375	.	31	70	61	53	34	58
12616	NM_007682	Cenpb	centromere protein B	protein_coding	NP_031708.2	88376	.	5554	6784	6728	6327	5763	5746
12617	NM_001345902,NM_001345903,NM_001345904,NM_007683,XM_017320636,XM_017320638,XM_030254095,XM_030254096,XM_030254097	Cenpc1	centromere protein C1	protein_coding	NP_001332831.1;NP_001332832.1;NP_001332833.1;NP_031709.2;XP_017176125.1;XP_017176127.1;XP_030109955.1;XP_030109956.1;XP_030109957.1	99700	.	646	676	660	654	609	650
12622	NM_009887	Cer1	cerberus 1, DAN family BMP antagonist	protein_coding	NP_034017.1	1201414	.	0	0	0	0	0	0
12623	NM_021456	Ces1g	carboxylesterase 1G	protein_coding	NP_067431.2	88378	.	0	0	0	0	0	0
12626	NM_007684,XM_006517074	Cetn3	centrin 3	protein_coding	NP_031710.1;XP_006517137.1	1097706	.	1240	1317	1180	1323	1326	1366
12627	NM_007685,NR_153806	Cfc1	cripto, FRL-1, cryptic family 1	protein_coding	NP_031711.1	109448	.	0	0	0	0	0	0
12628	NM_009888	Cfh	complement component factor h	protein_coding	NP_034018.2	88385	.	953	1352	922	1030	638	1305
12630	NM_001329552,NM_007686,XM_006500962,XM_006500963	Cfi	complement component factor i	protein_coding	NP_001316481.1;NP_031712.2;XP_006501025.1;XP_006501026.1	105937	.	0	0	0	0	0	0
12631	NM_007687	Cfl1	cofilin 1, non-muscle	protein_coding	NP_031713.1	101757	.	27944	29523	29237	30163	29164	22615
12632	NM_007688,XM_006515452	Cfl2	cofilin 2, muscle	protein_coding	NP_031714.1;XP_006515515.1	101763	.	2365	2911	2425	2419	2335	2275
12633	NM_001289704,NM_001293804,NM_001293805,NM_001355056,NM_009805,NM_207653,NR_149255,NR_149256,NR_149257,NR_149258,XM_006495635,XM_011238420,XM_011238421,XM_011238422,XM_011238423,XM_017313559,XM_030244988	Cflar	CASP8 and FADD-like apoptosis regulator	protein_coding	NP_001276633.1;NP_001280733.1;NP_001280734.1;NP_001341985.1;NP_033935.2;NP_997536.1;XP_006495698.1;XP_011236722.1;XP_011236723.1;XP_011236724.1;XP_011236725.1;XP_017169048.1;XP_030100848.1	1336166	.	1046	1226	1001	1055	907	1195
12638	NM_021050	Cftr	cystic fibrosis transmembrane conductance regulator	protein_coding	NP_066388.1	88388	.	24	17	12	21	9	21
12640	NM_009889,XM_006537586	Cga	glycoprotein hormones, alpha subunit	protein_coding	NP_034019.1;XP_006537649.1	88390	.	0	0	0	0	0	0
12642	NM_009890	Ch25h	cholesterol 25-hydroxylase	protein_coding	NP_034020.1	1333869	.	12	7	2	7	13	11
12643	NM_007689	Chad	chondroadherin	protein_coding	NP_031715.1	1096866	.	11	9	7	7	5	15
12647	NM_009891	Chat	choline acetyltransferase	protein_coding	NP_034021.1	88392	.	0	0	2	0	0	0
12648	NM_007690	Chd1	chromodomain helicase DNA binding protein 1	protein_coding	NP_031716.2	88393	.	1040	1165	1065	1103	965	1032
12649	NM_007691,XM_017313117	Chek1	checkpoint kinase 1	protein_coding	NP_031717.2;XP_017168606.1	1202065	.	41	18	30	26	23	41
12651	NM_007692,NR_037153,NR_037154	Chkb	choline kinase beta	protein_coding	NP_031718.1	1328313	.	440	511	543	450	444	421
12652	NM_007693	Chga	chromogranin A	protein_coding	NP_031719.1	88394	.	4429	4062	4602	4298	4834	3991
12653	NM_007694	Chgb	chromogranin B	protein_coding	NP_031720.1	88395	.	40265	39352	41607	43188	36510	19568
12654	NM_001374626,NM_007695,XM_006529112	Chil1	chitinase-like 1	protein_coding	NP_001361555.1;NP_031721.2;XP_006529175.1	1340899	.	332	433	325	407	334	397
12655	NM_009892	Chil3	chitinase-like 3	protein_coding	NP_034022.2	1330860	.	0	0	0	0	0	0
12659	NM_007696	Ovgp1	oviductal glycoprotein 1	protein_coding	NP_031722.1	106661	.	14	15	0	10	15	9
12660	NM_001271496,NM_013490,NR_073190,XM_006531646,XM_006531648,XM_011248599,XM_017318048,XM_017318049,XM_030250724,XM_030250725,XM_030250726,XM_030250727,XM_030250728,XM_030250729,XM_030250730,XM_030250731,XR_003952740,XR_388248	Chka	choline kinase alpha	protein_coding	NP_001258425.1;NP_038518.2;XP_006531709.1;XP_006531711.1;XP_011246901.1;XP_017173537.1;XP_017173538.1;XP_030106584.1;XP_030106585.1;XP_030106586.1;XP_030106587.1;XP_030106588.1;XP_030106589.1;XP_030106590.1;XP_030106591.1	107760	.	1647	1602	1623	1764	1763	1368
12661	NM_007697,XM_006505467,XM_006505468,XM_006505469,XM_006505470,XM_006505471,XM_006505472,XM_006505473,XM_011241198,XM_017321375,XM_017321376,XM_017321377,XM_030255131,XM_030255132,XM_030255133	Chl1	cell adhesion molecule L1-like	protein_coding	NP_031723.2;XP_006505530.1;XP_006505531.1;XP_006505532.1;XP_006505533.1;XP_006505534.1;XP_006505535.1;XP_006505536.1;XP_011239500.1;XP_017176864.1;XP_017176865.1;XP_017176866.1;XP_030110991.1;XP_030110992.1;XP_030110993.1	1098266	.	8612	7920	8829	8976	8741	10076
12662	NM_001370788,NM_001370789,NM_001370790,NM_018818,XM_006528381,XM_006528382,XM_006528383,XM_006528384,XM_030251211,XR_001782732,XR_387043	Chm	choroidermia (RAB escort protein 1)	protein_coding	NP_001357717.1;NP_001357718.1;NP_001357719.1;NP_061288.2;XP_006528444.1;XP_006528445.1;XP_006528446.1;XP_006528447.1;XP_030107071.1	892979	.	2841	2694	2603	2661	2307	2389
12663	NM_021350	Chml	choroideremia-like	protein_coding	NP_067325.2	101913	.	227	300	252	251	229	273
12667	NM_001278041,NM_001354995,NM_001354996,NM_009893,XM_006521745,XM_011245814,XM_011245815,XM_011245816,XM_011245817,XM_017316860,XM_017316861,XM_030248947,XM_030248948,XM_030248950,XR_001781784,XR_003951745,XR_003951746,XR_875721	Chrd	chordin	protein_coding	NP_001264970.1;NP_001341924.1;NP_001341925.1;NP_034023.1;XP_006521808.1;XP_011244116.1;XP_011244117.1;XP_011244118.1;XP_011244119.1;XP_017172349.1;XP_017172350.1;XP_030104807.1;XP_030104808.1;XP_030104810.1	1313268	.	645	588	774	619	719	574
12669	NM_001112697,NM_007698	Chrm1	cholinergic receptor, muscarinic 1, CNS	protein_coding	NP_001106167.1;NP_031724.2	88396	.	12675	11628	14050	13312	12449	9798
12671	NM_033269,XM_006516468	Chrm3	cholinergic receptor, muscarinic 3, cardiac	protein_coding	NP_150372.1;XP_006516531.1	88398	.	3768	2319	4412	3497	3560	2493
12672	NM_007699,XM_006498654	Chrm4	cholinergic receptor, muscarinic 4	protein_coding	NP_031725.1;XP_006498717.1	88399	.	727	325	796	590	797	716
12675	NM_001162410,NM_007700,XM_030250732,XR_003952741,XR_003952742	Chuk	conserved helix-loop-helix ubiquitous kinase	protein_coding	NP_001155882.1;NP_031726.2;XP_030106592.1	99484	.	504	574	447	435	427	405
12677	NM_001301427,NM_007701	Vsx2	visual system homeobox 2	protein_coding	NP_001288356.1;NP_031727.1	88401	.	8	11	3	11	9	5
12683	NM_007702	Cidea	cell death-inducing DNA fragmentation factor, alpha subunit-like effector A	protein_coding	NP_031728.2	1270845	.	305	385	258	302	322	175
12684	NM_009894	Cideb	cell death-inducing DNA fragmentation factor, alpha subunit-like effector B	protein_coding	NP_034024.2	1270844	.	38	59	55	87	41	52
12686	NM_001374665,NM_007703	Elovl3	elongation of very long chain fatty acids (FEN1/Elo2, SUR4/Elo3, yeast)-like 3	protein_coding	NP_001361594.1;NP_031729.1	1195976	.	0	0	0	0	0	0
12695	NM_001005784,NM_001005787,NM_001355177,NM_007704,NM_172696,XM_006502699,XM_006502700,XM_006502701,XM_006502702,XM_006502703,XM_006502704,XM_006502705,XM_006502706,XM_006502707	Patj	PATJ, crumbs cell polarity complex component	protein_coding	NP_001005784.1;NP_001005787.1;NP_001342106.1;NP_031730.1;NP_766284.2;XP_006502762.1;XP_006502763.1;XP_006502764.1;XP_006502765.1;XP_006502766.1;XP_006502767.1;XP_006502768.1;XP_006502769.1;XP_006502770.1	1277960	.	235	196	137	166	162	185
12696	NM_001379421,NM_001379422,NM_001379423,NM_001379424,NM_001379425,NM_007705,NR_152857,XM_006513165	Cirbp	cold inducible RNA binding protein	protein_coding	NP_001366350.1;NP_001366351.1;NP_001366352.1;NP_001366353.1;NP_001366354.1;NP_031731.1;XP_006513228.1	893588	.	1688	1963	1745	1751	1600	1539
12700	NM_001317354,NM_009895,XM_006511635	Cish	cytokine inducible SH2-containing protein	protein_coding	NP_001304283.1;NP_034025.1;XP_006511698.1	103159	.	118	91	95	113	119	84
12702	NM_007707,XM_011248707,XM_030245509	Socs3	suppressor of cytokine signaling 3	protein_coding	NP_031733.1;XP_011247009.1;XP_030101369.1	1201791	.	29	52	36	30	28	30
12703	NM_001271603,NM_009896	Socs1	suppressor of cytokine signaling 1	protein_coding	NP_001258532.1;NP_034026.1	1354910	.	3	15	16	8	9	14
12704	NM_007708,XM_006530130,XM_006530131,XM_006530132,XM_006530133,XM_006530134,XM_006530135,XM_006530136,XM_006530137,XM_006530138,XM_006530139,XM_006530140,XM_006530141,XM_006530142,XM_006530143,XM_006530145,XM_006530146,XM_006530147,XM_006530148,XM_006530149,XM_006530150,XM_006530151,XM_006530152,XM_006530153,XM_011248163,XM_017320640,XM_017320641,XM_017320643,XM_017320644,XM_017320645,XM_017320646…	Cit	citron	protein_coding	NP_031734.3;XP_006530193.1;XP_006530194.1;XP_006530195.1;XP_006530196.1;XP_006530197.1;XP_006530198.1;XP_006530199.1;XP_006530200.1;XP_006530201.1;XP_006530202.1;XP_006530203.1;XP_006530204.1;XP_006530205.1;XP_006530206.1;XP_006530208.1;XP_006530209.1;XP_006530210.1;XP_006530211.1;XP_006530212.1;XP_006530213.1;XP_006530214.1;XP_006530215.1;XP_006530216.1;XP_011246465.1;XP_017176129.1;XP_017176130…	105313	.	1012	842	1094	984	1154	968
12705	NM_001276466,NM_001276473,NM_001276474,NM_007709	Cited1	Cbp/p300-interacting transactivator with Glu/Asp-rich carboxy-terminal domain 1	protein_coding	NP_001263395.1;NP_001263402.1;NP_001263403.1;NP_031735.1	108023	.	32	52	35	41	39	32
12706	gene-Ckb-ps2	Ckb-ps2	creatine kinase, brain, pseudogene 2	pseudogene	.	88404	.	0	0	1	1	0	0
12708	gene-Ck-ps3	Ck-ps3	creatine kinase pseudogene 3	pseudogene	.	88406	.	1	1	1	1	2	3
12709	NM_021273	Ckb	creatine kinase, brain	protein_coding	NP_067248.1	88407	.	33005	43067	39291	38644	33772	35871
12715	NM_007710	Ckm	creatine kinase, muscle	protein_coding	NP_031736.1	88413	.	0	0	0	0	0	0
12716	NM_001355069,NM_009897,XM_006498656	Ckmt1	creatine kinase, mitochondrial 1, ubiquitous	protein_coding	NP_001341998.1;NP_034027.1;XP_006498719.1	99441	.	5966	5300	6433	5692	7012	5423
12721	NM_001301374,NM_009898,XM_006507284,XM_006507285	Coro1a	coronin, actin binding protein 1A	protein_coding	NP_001288303.1;NP_034028.1;XP_006507347.1;XP_006507348.1	1345961	.	2976	3304	3522	3379	3137	2572
12722	NM_009899,NR_130895,XM_006500965,XM_006500968,XM_011240004,XR_003954276	Clca3a1	chloride channel accessory 3A1	protein_coding	NP_034029.2;XP_006501028.1;XP_006501031.1;XP_011238306.1	1316732	.	8	0	0	6	5	0
12723	NM_001363712,NM_013491,XM_006505476,XR_003956160	Clcn1	chloride channel, voltage-sensitive 1	protein_coding	NP_001350641.1;NP_038519.1;XP_006505539.1	88417	.	7	8	15	12	7	8
12724	NM_009900,XM_006521749,XM_017316862,XM_030248952,XR_001781785,XR_003951747,XR_003951748,XR_003951749,XR_384520	Clcn2	chloride channel, voltage-sensitive 2	protein_coding	NP_034030.2;XP_006521812.1;XP_017172351.1;XP_030104812.1	105061	.	1033	1127	1296	1109	1139	1031
12725	NM_007711,NM_173873,NM_173874,NM_173876,XM_006509259,XM_006509260,XM_017312552,XM_017312553,XR_001778397	Clcn3	chloride channel, voltage-sensitive 3	protein_coding	NP_031737.1;NP_776298.1;NP_776299.1;NP_776301.1;XP_006509322.1;XP_006509323.1;XP_017168041.1;XP_017168042.1	103555	.	9232	10037	9322	9637	8512	8621
12727	NM_001302386,NM_001302387,NM_001357102,NM_001357103,NM_001357104,NM_011334,NR_126156,NR_126157,XM_006539502,XM_030242049,XM_030242050,XM_030242051,XM_030242052,XM_030242053,XM_030242054,XM_030242055,XM_030242056,XR_003946379,XR_003946380,XR_391040	Clcn4	chloride channel, voltage-sensitive 4	protein_coding	NP_001289315.1;NP_001289316.1;NP_001344031.1;NP_001344032.1;NP_001344033.1;NP_035464.3;XP_006539565.1;XP_030097909.1;XP_030097910.1;XP_030097911.1;XP_030097912.1;XP_030097913.1;XP_030097914.1;XP_030097915.1;XP_030097916.1	104571	.	10430	10814	11166	10735	10001	9001
12728	NM_001243762,NM_016691,XM_006527562,XM_011247442,XM_011247443,XM_011247444,XM_011247445,XM_011247446	Clcn5	chloride channel, voltage-sensitive 5	protein_coding	NP_001230691.1;NP_057900.3;XP_006527625.1;XP_011245744.1;XP_011245745.1;XP_011245746.1;XP_011245747.1;XP_011245748.1	99486	.	505	527	450	430	348	484
12729	NM_023671	Clns1a	chloride channel, nucleotide-sensitive, 1A	protein_coding	NP_076160.1	109638	.	2439	2615	2638	2808	2588	2447
12733	NM_001146307,NM_024412	Clcnka	chloride channel, voltage-sensitive Ka	protein_coding	NP_001139779.1;NP_077723.3	1329026	.	0	0	7	6	8	5
12737	NM_016674	Cldn1	claudin 1	protein_coding	NP_057883.1	1276109	.	356	21	29	30	41	48
12738	NM_016675,XM_006528486,XM_006528487,XM_006528488,XM_006528489,XM_006528490	Cldn2	claudin 2	protein_coding	NP_057884.1;XP_006528549.1;XP_006528550.1;XP_006528551.1;XP_006528552.1;XP_006528553.1	1276110	.	703	62	38	23	81	69
12739	NM_009902	Cldn3	claudin 3	protein_coding	NP_034032.1	1329044	.	30	5	0	4	2	8
12740	NM_009903	Cldn4	claudin 4	protein_coding	NP_034033.1	1313314	.	2	0	0	0	0	0
12741	NM_013805	Cldn5	claudin 5	protein_coding	NP_038833.2	1276112	.	654	921	816	868	604	706
12745	NM_001329627,NM_001329680,NM_009904,XM_006530636,XM_011248296,XM_011248297,XM_011248298,XM_017312554,XM_030243275,XM_030243276	Clgn	calmegin	protein_coding	NP_001316556.1;NP_001316609.1;NP_034034.2;XP_006530699.1;XP_011246598.1;XP_011246599.1;XP_011246600.1;XP_017168043.1;XP_030099135.1;XP_030099136.1	107472	.	354	386	453	391	368	332
12747	NM_001042634,NR_027853,NR_027854	Clk1	CDC-like kinase 1	protein_coding	NP_001036099.1	107403	.	590	647	745	592	792	753
12748	NM_001163432,NM_007712	Clk2	CDC-like kinase 2	protein_coding	NP_001156904.1;NP_031738.2	1098669	.	475	534	522	533	498	439
12750	NM_001304744,NM_001362535,NM_001362536,NM_001362538,NM_001362539,NM_001362540,NM_001362541,NM_007714,XM_006532112,XM_006532114,XM_006532118,XM_011248708,XM_017314243,XM_030245510,XM_030245511,XM_030245512	Clk4	CDC like kinase 4	protein_coding	NP_001291673.1;NP_001349464.1;NP_001349465.1;NP_001349467.1;NP_001349468.1;NP_001349469.1;NP_001349470.1;NP_031740.1;XP_006532175.1;XP_006532177.1;XP_006532181.1;XP_011247010.1;XP_017169732.1;XP_030101370.1;XP_030101371.1;XP_030101372.1	1098551	.	552	733	598	523	567	603
12751	NM_009906,XM_011241668	Tpp1	tripeptidyl peptidase I	protein_coding	NP_034036.1;XP_011239970.1	1336194	.	2645	3050	2743	2707	2430	2552
12752	NM_001146311,NM_001329789,NM_009907,XM_006507288,XM_006507289,XM_006507292,XM_006507293,XM_017321963,XM_030242057,XM_030242058,XM_030242059,XR_378213	Cln3	ceroid lipofuscinosis, neuronal 3, juvenile (Batten, Spielmeyer-Vogt disease)	protein_coding	NP_001139783.1;NP_001316718.1;NP_034037.3;XP_006507351.1;XP_006507352.1;XP_006507355.1;XP_006507356.1;XP_017177452.1;XP_030097917.1;XP_030097918.1;XP_030097919.1	107537	.	406	580	454	462	384	424
12753	NM_001289826,NM_001305222,NM_007715,XM_011249402,XM_017320648,XM_017320649,XM_017320650,XM_017320651,XM_030254101,XM_030254102,XM_030254103,XR_001784601,XR_001784602	Clock	circadian locomotor output cycles kaput	protein_coding	NP_001276755.1;NP_001292151.1;NP_031741.1;XP_011247704.1;XP_017176137.1;XP_017176138.1;XP_017176139.1;XP_017176140.1;XP_030109961.1;XP_030109962.1;XP_030109963.1	99698	.	4056	4014	4064	4051	3420	3817
12757	NM_001080384,NM_001080385,NM_001080386,NM_001290470,NM_001369156,NM_001369157,NM_001369158,NM_001369159,NM_016760,XM_006537587,XM_030253143,XM_030253145,XM_030253146	Clta	clathrin, light polypeptide (Lca)	protein_coding	NP_001073853.1;NP_001073854.1;NP_001073855.1;NP_001277399.1;NP_001356085.1;NP_001356086.1;NP_001356087.1;NP_001356088.1;NP_058040.2;XP_006537650.1;XP_030109003.1;XP_030109005.1;XP_030109006.1	894297	.	5106	5956	5898	6117	5792	5457
12759	NM_013492,XM_006518503,XM_006518504,XM_030247632	Clu	clusterin	protein_coding	NP_038520.2;XP_006518566.1;XP_006518567.1;XP_030103492.1	88423	.	36722	64295	37106	48867	34372	54972
12763	NM_001111110,NM_001284519,NM_001284520,NM_007717,XM_011244265,XM_011244266,XM_011244274	Cmah	cytidine monophospho-N-acetylneuraminic acid hydroxylase	protein_coding	NP_001104580.1;NP_001271448.1;NP_001271449.1;NP_031743.3;XP_011242567.1;XP_011242568.1;XP_011242576.1	103227	.	10	9	10	8	9	9
12764	NM_009908,XM_030255134	Cmas	cytidine monophospho-N-acetylneuraminic acid synthetase	protein_coding	NP_034038.2;XP_030110994.1	1337124	.	2527	2498	2492	2656	2618	2178
12765	NM_009909,XM_006495638	Cxcr2	chemokine (C-X-C motif) receptor 2	protein_coding	NP_034039.1;XP_006495701.1	105303	.	0	0	0	0	0	0
12766	NM_009910	Cxcr3	chemokine (C-X-C motif) receptor 3	protein_coding	NP_034040.1	1277207	.	0	0	4	5	2	2
12767	NM_001356509,NM_009911,XM_006529114	Cxcr4	chemokine (C-X-C motif) receptor 4	protein_coding	NP_001343438.1;NP_034041.2;XP_006529177.1	109563	.	134	279	174	190	126	202
12768	NM_009912	Ccr1	chemokine (C-C motif) receptor 1	protein_coding	NP_034042.3	104618	.	8	11	8	3	6	11
12769	NM_001166625,NM_009913	Ccr9	chemokine (C-C motif) receptor 9	protein_coding	NP_001160097.1;NP_034043.1	1341902	.	3	3	6	4	0	3
12770	NM_007718	Ccr1l1	chemokine (C-C motif) receptor 1-like 1	protein_coding	NP_031744.3	104617	.	0	0	0	0	0	0
12771	NM_009914,XM_017313119,XM_017313120	Ccr3	chemokine (C-C motif) receptor 3	protein_coding	NP_034044.3;XP_017168608.1;XP_017168609.1	104616	.	0	0	0	0	0	0
12772	NM_009915,XM_006512428,XM_011243063,XM_011243064	Ccr2	chemokine (C-C motif) receptor 2	protein_coding	NP_034045.1;XP_006512491.1;XP_011241365.1;XP_011241366.1	106185	.	3	5	0	0	4	4
12773	NM_009916,XM_006511932,XM_006511933,XM_006511934,XM_011242933	Ccr4	chemokine (C-C motif) receptor 4	protein_coding	NP_034046.2;XP_006511995.1;XP_006511996.1;XP_006511997.1;XP_011241235.1	107824	.	0	0	0	0	0	0
12774	NM_009917	Ccr5	chemokine (C-C motif) receptor 5	protein_coding	NP_034047.2	107182	.	195	344	187	280	193	224
12775	NM_001301713,NM_007719	Ccr7	chemokine (C-C motif) receptor 7	protein_coding	NP_001288642.1;NP_031745.2	103011	.	2	0	0	0	4	0
12776	NM_007720	Ccr8	chemokine (C-C motif) receptor 8	protein_coding	NP_031746.1	1201402	.	0	0	0	0	0	0
12777	NM_007721	Ccr10	chemokine (C-C motif) receptor 10	protein_coding	NP_031747.2	1096320	.	0	5	8	2	5	0
12778	NM_001271607,NM_007722	Ackr3	atypical chemokine receptor 3	protein_coding	NP_001258536.1;NP_031748.2	109562	.	701	867	808	785	723	551
12780	NM_013806,XM_006526625	Abcc2	ATP-binding cassette, sub-family C (CFTR/MRP), member 2	protein_coding	NP_038834.2;XP_006526688.1	1352447	.	0	0	0	4	0	0
12785	NM_001109745,NM_001109746,NM_001347325,NM_001355195,NM_013493	Cnbp	cellular nucleic acid binding protein	protein_coding	NP_001103215.1;NP_001103216.1;NP_001334254.1;NP_001342124.1;NP_038521.1	88431	.	9405	10918	9532	9985	9749	9887
12788	NM_007723,XM_006503709	Cnga1	cyclic nucleotide gated channel alpha 1	protein_coding	NP_031749.2;XP_006503772.1	88436	.	0	0	0	0	0	0
12789	NM_007724,XM_006527761	Cnga2	cyclic nucleotide gated channel alpha 2	protein_coding	NP_031750.2;XP_006527824.1	108040	.	0	0	0	0	3	0
12790	NM_001282010,NM_009918,XM_017313745,XM_017313748	Cnga3	cyclic nucleotide gated channel alpha 3	protein_coding	NP_001268939.1;NP_034048.1;XP_017169234.1;XP_017169237.1	1341818	.	4	10	4	0	0	0
12793	NM_001355011,NM_009919	Cnih1	cornichon family AMPA receptor auxiliary protein 1	protein_coding	NP_001341940.1;NP_034049.2	1277202	.	2436	2451	2301	2486	2349	2072
12794	NM_001302333,NM_009920	Cnih2	cornichon family AMPA receptor auxiliary protein 2	protein_coding	NP_001289262.1;NP_034050.1	1277225	.	14283	13984	18077	16625	15652	11510
12795	NM_001313916,NM_013807	Plk3	polo like kinase 3	protein_coding	NP_001300845.1;NP_038835.2	109604	.	287	294	362	327	276	282
12796	NM_009921	Camp	cathelicidin antimicrobial peptide	protein_coding	NP_034051.2	108443	.	0	0	2	0	4	0
12797	NM_009922,XM_006509969,XM_011242388	Cnn1	calponin 1	protein_coding	NP_034052.3;XP_006510032.1;XP_011240690.1	104979	.	14	15	6	5	18	15
12798	NM_007725	Cnn2	calponin 2	protein_coding	NP_031751.1	105093	.	153	247	181	194	200	204
12799	NM_001146318,NM_009923,XM_006532120,XM_017314245	Cnp	2',3'-cyclic nucleotide 3' phosphodiesterase	protein_coding	NP_001139790.1;NP_034053.2;XP_006532183.1;XP_017169734.1	88437	.	18650	33509	22993	21047	13908	20952
12801	NM_001355020,NM_001355021,NM_001365881,NM_007726,XM_006537591,XM_006537592,XM_006537593,XM_006537594,XM_006537595,XM_030253148,XM_030253149	Cnr1	cannabinoid receptor 1 (brain)	protein_coding	NP_001341949.1;NP_001341950.1;NP_001352810.1;NP_031752.1;XP_006537654.1;XP_006537655.1;XP_006537656.1;XP_006537657.1;XP_006537658.1;XP_030109008.1;XP_030109009.1	104615	.	8937	7971	7997	8172	8782	8511
12802	NM_001305278,NM_009924	Cnr2	cannabinoid receptor 2 (macrophage)	protein_coding	NP_001292207.1;NP_034054.3	104650	.	7	20	13	24	12	20
12803	NM_170786	Cntf	ciliary neurotrophic factor	protein_coding	NP_740756.1	88439	.	71	115	51	59	45	71
12804	NM_001136056,NM_001379211,NM_001379212,NM_001379213,NM_001379214,NM_001379215,NM_001379216,NM_016673,XM_006537596,XM_011249917,XM_017319942,XM_030253151,XM_030253154	Cntfr	ciliary neurotrophic factor receptor	protein_coding	NP_001129528.1;NP_001366140.1;NP_001366141.1;NP_001366142.1;NP_001366143.1;NP_001366144.1;NP_001366145.1;NP_057882.2;XP_006537659.1;XP_011248219.1;XP_017175431.1;XP_030109011.1;XP_030109014.1	99605	.	1979	2779	2285	2397	2060	2370
12805	NM_001159647,NM_001159648,NM_001358051,NM_007727,XM_006520383,XM_017316422,XM_017316423	Cntn1	contactin 1	protein_coding	NP_001153119.1;NP_001153120.1;NP_001344980.1;NP_031753.1;XP_006520446.1;XP_017171911.1;XP_017171912.1	105980	.	22229	21562	21473	21625	19502	18827
12807	NM_001146323,NM_001146324,NM_080634,XM_006535377,XM_006535378,XM_006535379,XM_006535380,XM_030252407,XM_030252408,XR_001783645,XR_001783646,XR_003954277,XR_389587	Hps3	HPS3, biogenesis of lysosomal organelles complex 2 subunit 1	protein_coding	NP_001139795.1;NP_001139796.1;NP_542365.3;XP_006535440.1;XP_006535441.1;XP_006535442.1;XP_006535443.1;XP_030108267.1;XP_030108268.1	2153839	.	605	581	618	596	564	526
12808	NM_001282993,NM_001282994,NM_172496,XM_006514481,XM_006514485,XM_011243651,XM_011243652,XM_011243653,XM_011243654,XM_011243655,XM_011243656,XM_030245514,XM_030245515	Cobl	cordon-bleu WH2 repeat	protein_coding	NP_001269922.1;NP_001269923.1;NP_766084.3;XP_006514544.1;XP_006514548.1;XP_011241953.1;XP_011241954.1;XP_011241955.1;XP_011241956.1;XP_011241957.1;XP_011241958.1;XP_030101374.1;XP_030101375.1	105056	.	412	512	471	390	383	581
12810	NM_001198835,NM_007728,XM_017314943	Coch	cochlin	protein_coding	NP_001185764.1;NP_031754.1;XP_017170432.1	1278313	.	194	122	125	103	118	140
12812	NM_016706	Coil	coilin	protein_coding	NP_057915.2	104842	.	733	665	769	718	738	670
12813	NM_009925	Col10a1	collagen, type X, alpha 1	protein_coding	NP_034055.1	88445	.	4	9	4	6	0	0
12814	NM_007729,XM_006500969,XM_006500970,XM_006500971,XM_030252409,XR_375486	Col11a1	collagen, type XI, alpha 1	protein_coding	NP_031755.2;XP_006501032.1;XP_006501033.1;XP_006501034.1;XP_030108269.1	88446	.	66	52	92	68	40	59
12815	NM_001317722,NM_009926,XM_006523559,XM_006523560,XM_006523561,XM_006523562,XM_006523563,XM_006523564,XM_006523566,XM_006523567,XM_006523568,XM_006523569,XM_006523570,XM_006523571,XR_385275,XR_385276	Col11a2	collagen, type XI, alpha 2	protein_coding	NP_001304651.1;NP_034056.1;XP_006523622.1;XP_006523623.1;XP_006523624.1;XP_006523625.1;XP_006523626.1;XP_006523627.1;XP_006523629.1;XP_006523630.1;XP_006523631.1;XP_006523632.1;XP_006523633.1;XP_006523634.1	88447	.	702	1022	934	846	564	794
12816	NM_001290308,XM_006510797,XM_006510800	Col12a1	collagen, type XII, alpha 1	protein_coding	NP_001277237.1;XP_006510860.1;XP_006510863.1	88448	.	143	161	150	191	177	161
12817	NM_001304757,NM_007731,XM_006513170,XM_006513171,XM_011243322,XM_011243323,XM_011243324,XM_011243325,XM_011243326,XM_011243327,XM_011243328,XM_011243329,XM_011243330,XM_011243331,XM_011243332,XM_011243333,XM_011243335,XM_011243336,XM_011243337,XM_011243339,XM_011243341,XM_011243342,XM_011243343,XM_011243344,XM_030244856,XM_030244857,XM_030244858	Col13a1	collagen, type XIII, alpha 1	protein_coding	NP_001291686.1;NP_031757.1;XP_006513233.1;XP_006513234.1;XP_011241624.1;XP_011241625.1;XP_011241626.1;XP_011241627.1;XP_011241628.1;XP_011241629.1;XP_011241630.1;XP_011241631.1;XP_011241632.1;XP_011241633.1;XP_011241634.1;XP_011241635.1;XP_011241637.1;XP_011241638.1;XP_011241639.1;XP_011241641.1;XP_011241643.1;XP_011241644.1;XP_011241645.1;XP_011241646.1;XP_030100716.1;XP_030100717.1;XP_030100718…	1277201	.	27	49	45	40	33	39
12818	NM_001368422,NM_181277,XM_006520385	Col14a1	collagen, type XIV, alpha 1	protein_coding	NP_001355351.1;NP_851794.3;XP_006520448.1	1341272	.	95	41	31	37	25	56
12819	NM_009928,XM_006537601,XR_001784085	Col15a1	collagen, type XV, alpha 1	protein_coding	NP_034058.2;XP_006537664.1	88449	.	72	167	100	106	62	101
12821	NM_001290825,NM_007732	Col17a1	collagen, type XVII, alpha 1	protein_coding	NP_001277754.1;NP_031758.2	88450	.	76	5	0	4	2	4
12822	NM_001109991,NM_009929,XM_006513173,XM_006513174,XM_006513176,XM_011243346,XM_011243347	Col18a1	collagen, type XVIII, alpha 1	protein_coding	NP_001103461.1;NP_034059.2;XP_006513236.1;XP_006513237.1;XP_006513239.1;XP_011241648.1;XP_011241649.1	88451	.	251	114	127	124	85	158
12823	NM_007733,XM_006495642,XM_006495643,XM_006495644,XM_006495645,XM_006495646,XM_030245411	Col19a1	collagen, type XIX, alpha 1	protein_coding	NP_031759.2;XP_006495705.1;XP_006495706.1;XP_006495707.1;XP_006495708.1;XP_006495709.1;XP_030101271.1	1095415	.	237	128	286	176	245	208
12824	NM_001113515,NM_031163,XM_006520386	Col2a1	collagen, type II, alpha 1	protein_coding	NP_001106987.2;NP_112440.2;XP_006520449.1	88452	.	45	60	45	31	24	45
12825	NM_009930	Col3a1	collagen, type III, alpha 1	protein_coding	NP_034060.2	88453	.	25	36	32	41	19	58
12826	NM_009931,NR_133670,XM_017312555	Col4a1	collagen, type IV, alpha 1	protein_coding	NP_034061.2;XP_017168044.1	88454	.	997	1164	1000	1028	871	1072
12827	NM_009932	Col4a2	collagen, type IV, alpha 2	protein_coding	NP_034062.3	88455	.	1005	882	1029	956	825	855
12828	NM_007734	Col4a3	collagen, type IV, alpha 3	protein_coding	NP_031760.2	104688	.	57	18	8	16	15	16
12829	NM_007735,XM_011238652,XM_011238653,XM_030245430	Col4a4	collagen, type IV, alpha 4	protein_coding	NP_031761.1;XP_011236954.1;XP_011236955.1;XP_030101290.1	104687	.	105	63	36	39	44	30
12830	NM_001163155,NM_007736,XM_006528696,XM_006528697,XM_017318372	Col4a5	collagen, type IV, alpha 5	protein_coding	NP_001156627.1;NP_031762.2;XP_006528759.1;XP_006528760.1;XP_017173861.1	88456	.	171	198	135	122	90	203
12831	NM_015734,XM_006497644	Col5a1	collagen, type V, alpha 1	protein_coding	NP_056549.2;XP_006497707.1	88457	.	52	47	41	59	64	57
12832	NM_007737	Col5a2	collagen, type V, alpha 2	protein_coding	NP_031763.2	88458	.	65	85	66	70	56	71
12833	NM_009933	Col6a1	collagen, type VI, alpha 1	protein_coding	NP_034063.1	88459	.	149	130	98	82	172	177
12834	NM_001347207,NM_146007	Col6a2	collagen, type VI, alpha 2	protein_coding	NP_001334136.1;NP_666119.1	88460	.	76	83	55	68	89	128
12835	NM_001243008,NM_001243009,XM_030245436,XM_030245437,XM_030245438,XM_030245451	Col6a3	collagen, type VI, alpha 3	protein_coding	NP_001229937.1;NP_001229938.1;XP_030101296.1;XP_030101297.1;XP_030101298.1;XP_030101311.1	88461	.	52	76	56	64	37	48
12836	NM_007738	Col7a1	collagen, type VII, alpha 1	protein_coding	NP_031764.2	88462	.	7	10	4	5	6	12
12837	NM_007739	Col8a1	collagen, type VIII, alpha 1	protein_coding	NP_031765.2	88463	.	687	17	19	25	46	53
12839	NM_001290691,NM_007740,XM_006495649	Col9a1	collagen, type IX, alpha 1	protein_coding	NP_001277620.1;NP_031766.3;XP_006495712.1	88465	.	15	22	9	8	8	9
12840	NM_007741	Col9a2	collagen, type IX, alpha 2	protein_coding	NP_031767.2	88466	.	48	71	66	62	53	83
12841	NM_001378777,NM_009936,XM_006500553	Col9a3	collagen, type IX, alpha 3	protein_coding	NP_001365706.1;NP_034066.2;XP_006500616.1	894686	.	884	648	436	418	367	609
12842	NM_007742	Col1a1	collagen, type I, alpha 1	protein_coding	NP_031768.2	88467	.	145	176	143	148	122	174
12843	NM_007743	Col1a2	collagen, type I, alpha 2	protein_coding	NP_031769.2	88468	.	318	420	254	256	218	375
12845	NM_016685,XM_006509539	Comp	cartilage oligomeric matrix protein	protein_coding	NP_057894.2;XP_006509602.1	88469	.	11	7	11	0	0	3
12846	NM_001111062,NM_001111063,NM_007744	Comt	catechol-O-methyltransferase	protein_coding	NP_001104532.1;NP_001104533.1;NP_031770.2	88470	.	2594	3176	3033	3068	2692	2166
12847	NM_009938,XM_030245513	Copa	coatomer protein complex subunit alpha	protein_coding	NP_034068.3;XP_030101373.1	1334462	.	9161	9933	9576	10119	9384	9068
12848	NM_001285507,NM_001285512,NM_001285513,NM_009939	Cops2	COP9 signalosome subunit 2	protein_coding	NP_001272436.1;NP_001272441.1;NP_001272442.1;NP_034069.2	1330276	.	4748	4854	4436	4683	4521	4322
12850	NM_001304758,NM_009940,XM_030242060	Coq7	demethyl-Q 7	protein_coding	NP_001291687.1;NP_034070.1;XP_030097920.1	107207	.	629	692	719	758	770	735
12854	NM_007745,XM_030253155	Cort	cortistatin	protein_coding	NP_031771.1;XP_030109015.1	109538	.	181	205	251	195	215	178
12856	NM_001017429,XM_006521750	Cox17	cytochrome c oxidase assembly protein 17, copper chaperone	protein_coding	NP_001017429.1;XP_006521813.1	1333806	.	1009	1094	1093	1001	967	1038
12857	NM_001293559,NM_009941	Cox4i1	cytochrome c oxidase subunit 4I1	protein_coding	NP_001280488.1;NP_034071.2	88473	.	13635	14709	14626	14273	14713	13135
12858	NM_007747,XM_030244034	Cox5a	cytochrome c oxidase subunit 5A	protein_coding	NP_031773.2;XP_030099894.1	88474	.	4125	3644	3668	3718	4134	3502
12859	NM_009942	Cox5b	cytochrome c oxidase subunit 5B	protein_coding	NP_034072.2	88475	.	4527	4493	5425	5153	5272	5087
12861	NM_007748	Cox6a1	cytochrome c oxidase subunit 6A1	protein_coding	NP_031774.2	103099	.	7178	8270	9014	8613	7910	6759
12862	NM_009943	Cox6a2	cytochrome c oxidase subunit 6A2	protein_coding	NP_034073.2	104649	.	55	39	75	60	84	67
12864	NM_053071	Cox6c	cytochrome c oxidase subunit 6C	protein_coding	NP_444301.1	104614	.	5808	5849	5916	5368	5891	5724
12865	NM_009944	Cox7a1	cytochrome c oxidase subunit 7A1	protein_coding	NP_034074.1	1316714	.	41	32	37	43	36	42
12866	NM_009945,XM_030244035	Cox7a2	cytochrome c oxidase subunit 7A2	protein_coding	NP_034075.2;XP_030099895.1	1316715	.	3974	4200	4336	4260	4399	3668
12867	NM_007749	Cox7c	cytochrome c oxidase subunit 7C	protein_coding	NP_031775.1	103226	.	3401	3642	3683	3488	3606	3263
12868	NM_007750	Cox8a	cytochrome c oxidase subunit 8A	protein_coding	NP_031776.1	105959	.	7802	9177	10573	9884	9168	9444
12869	NM_007751	Cox8b	cytochrome c oxidase subunit 8B	protein_coding	NP_031777.1	105958	.	29	2	6	5	17	9
12870	NM_001276248,NM_001276250,NM_001374677,NM_007752,XM_006535381,XM_011249655	Cp	ceruloplasmin	protein_coding	NP_001263177.1;NP_001263179.1;NP_001361606.1;NP_031778.2;XP_006535444.1;XP_011247957.1	88476	.	639	966	617	654	493	803
12873	NM_007753,XM_006535382	Cpa3	carboxypeptidase A3, mast cell	protein_coding	NP_031779.1;XP_006535445.1	88479	.	0	0	0	0	0	0
12874	NM_007754	Cpd	carboxypeptidase D	protein_coding	NP_031780.2	107265	.	5787	7041	6340	5723	5105	5850
12876	NM_013494	Cpe	carboxypeptidase E	protein_coding	NP_038522.2	101932	.	100361	135049	106862	115152	104780	110725
12877	NM_001252525,NM_001252526,NM_001357107,NM_007755,XM_011250784,XM_011250785,XM_011250786,XM_011250787,XM_011250788,XM_011250790,XM_011250792,XM_017321964,XM_017321965,XM_030242061,XM_030242062,XM_030242063	Cpeb1	cytoplasmic polyadenylation element binding protein 1	protein_coding	NP_001239454.1;NP_001239455.1;NP_001344036.1;NP_031781.1;XP_011249086.1;XP_011249087.1;XP_011249088.1;XP_011249089.1;XP_011249090.1;XP_011249092.1;XP_011249094.1;XP_017177453.1;XP_017177454.1;XP_030097921.1;XP_030097922.1;XP_030097923.1	108442	.	2630	2655	2773	2767	2658	2178
12879	NM_001004455,NM_001161807,NM_138686,XM_006514951,XM_006514952,XR_003949983,XR_381177,XR_381178	Cys1	cystin 1	protein_coding	NP_001004455.2;NP_001155279.1;NP_619627.3;XP_006515014.1;XP_006515015.1	2177632	.	339	283	437	446	372	299
12889	NM_007756	Cplx1	complexin 1	protein_coding	NP_031782.3	104727	.	20300	21255	20583	20944	23231	16523
12890	NM_001362218,NM_009946,NR_155492,XM_017315376	Cplx2	complexin 2	protein_coding	NP_001349147.1;NP_034076.1;XP_017170865.1	104726	.	72869	77988	79165	81556	68936	51291
12891	NM_001136057,NM_001146183,NM_001360193,NM_009947	Cpne6	copine VI	protein_coding	NP_001129529.1;NP_001139655.1;NP_001347122.1;NP_034077.1	1334445	.	19105	18174	20218	21123	20398	14508
12892	NM_007757	Cpox	coproporphyrinogen oxidase	protein_coding	NP_031783.2	104841	.	1772	2170	2058	1905	1633	1785
12894	NM_013495,XM_006531654,XM_006531655,XM_006531658,XM_006531659,XM_011248602	Cpt1a	carnitine palmitoyltransferase 1a, liver	protein_coding	NP_038523.2;XP_006531717.1;XP_006531718.1;XP_006531721.1;XP_006531722.1;XP_011246904.1	1098296	.	1535	1594	1223	1400	1094	1460
12895	NM_009948	Cpt1b	carnitine palmitoyltransferase 1b, muscle	protein_coding	NP_034078.2	1098297	.	3	3	5	0	1	1
12896	NM_009949	Cpt2	carnitine palmitoyltransferase 2	protein_coding	NP_034079.2	109176	.	261	294	190	234	178	250
12902	NM_001368765,NM_007758,XM_006497222,XM_006497224,XM_006497225,XM_017314050,XR_865893	Cr2	complement receptor 2	protein_coding	NP_001355694.1;NP_031784.1;XP_006497285.1;XP_006497287.1;XP_006497288.1;XP_017169539.1	88489	.	0	0	5	7	4	5
12903	NM_001284507,NM_013496	Crabp1	cellular retinoic acid binding protein I	protein_coding	NP_001271436.1;NP_038524.1	88490	.	35	36	41	37	26	16
12904	NM_007759	Crabp2	cellular retinoic acid binding protein II	protein_coding	NP_031785.1	88491	.	9	28	30	24	35	33
12905	NM_001330138,NM_001330141,NM_001330175,NM_009950,XM_006513180,XM_006513181,XM_006513183,XM_006513184,XM_030244859	Cradd	CASP2 and RIPK1 domain containing adaptor with death domain	protein_coding	NP_001317067.1;NP_001317070.1;NP_001317104.1;NP_034080.1;XP_006513243.1;XP_006513244.1;XP_006513246.1;XP_006513247.1;XP_030100719.1	1336168	.	164	193	157	201	185	123
12908	NM_007760,XM_006497645,XM_006497646,XM_006497647,XM_030247065,XM_030247066,XM_030247067,XM_030247068,XM_030247069,XM_030247070,XM_030247071,XM_030247072	Crat	carnitine acetyltransferase	protein_coding	NP_031786.2;XP_006497708.1;XP_006497709.1;XP_006497710.1;XP_030102925.1;XP_030102926.1;XP_030102927.1;XP_030102928.1;XP_030102929.1;XP_030102930.1;XP_030102931.1;XP_030102932.1	109501	.	1462	1702	1562	1520	1459	1486
12909	NM_007761	Crcp	calcitonin gene-related peptide-receptor component protein	protein_coding	NP_031787.1	1100818	.	848	818	934	917	908	766
12912	NM_001037726,NM_009952,NM_133828,XM_006495650,XM_006495651,XM_006495652,XM_006495653,XM_006495654,XM_006495655,XM_011238424,XM_011238425,XM_017314080,XM_017314099,XM_030245776	Creb1	cAMP responsive element binding protein 1	protein_coding	NP_001032815.1;NP_034082.1;NP_598589.2;XP_006495713.1;XP_006495714.1;XP_006495715.1;XP_006495716.1;XP_006495717.1;XP_006495718.1;XP_011236726.1;XP_011236727.1;XP_017169569.1;XP_017169588.1;XP_030101636.1	88494	.	2298	2359	2240	2430	2266	2463
12913	NM_013497	Creb3	cAMP responsive element binding protein 3	protein_coding	NP_038525.2	99946	.	1247	1361	1280	1322	1226	1180
12914	NM_001025432,XM_006521751,XM_006521752,XM_006521753,XM_006521754	Crebbp	CREB binding protein	protein_coding	NP_001020603.1;XP_006521814.1;XP_006521815.1;XP_006521816.1;XP_006521817.1	1098280	.	2396	2364	2535	2479	1960	2166
12915	NM_017406	Atf6b	activating transcription factor 6 beta	protein_coding	NP_059102.2	105121	.	2629	2653	3067	2964	2906	2399
12916	NM_001110850,NM_001110851,NM_001110852,NM_001110853,NM_001110854,NM_001110855,NM_001110856,NM_001110857,NM_001110858,NM_001110859,NM_001271503,NM_001271504,NM_001271505,NM_001271506,NM_001311066,NM_001311067,NM_001374833,NM_013498,NR_073193,XM_006525554,XM_006525555,XM_006525556,XM_006525557,XM_006525559,XM_006525560,XM_006525561,XM_006525562,XM_006525563,XM_006525564,XM_006525565,XM_006525566,XM…	Crem	cAMP responsive element modulator	protein_coding	NP_001104320.1;NP_001104321.1;NP_001104322.1;NP_001104323.1;NP_001104324.2;NP_001104325.2;NP_001104326.1;NP_001104327.1;NP_001104328.1;NP_001104329.1;NP_001258432.1;NP_001258433.1;NP_001258434.1;NP_001258435.1;NP_001297995.1;NP_001297996.1;NP_001361762.1;NP_038526.2;XP_006525617.1;XP_006525618.1;XP_006525619.1;XP_006525620.1;XP_006525622.1;XP_006525623.1;XP_006525624.1;XP_006525625.1;XP_006525626…	88495	.	430	429	443	479	450	524
12918	NM_205769	Crh	corticotropin releasing hormone	protein_coding	NP_991338.1	88496	.	54	31	62	41	56	65
12919	NM_198408	Crhbp	corticotropin releasing hormone binding protein	protein_coding	NP_940800.1	88497	.	1230	1148	1409	1013	1221	924
12921	NM_001313928,NM_001313929,NM_007762,XM_017314246,XM_030245516,XR_001779869,XR_001779870,XR_001779871	Crhr1	corticotropin releasing hormone receptor 1	protein_coding	NP_001300857.1;NP_001300858.1;NP_031788.1;XP_017169735.1;XP_030101376.1	88498	.	265	198	360	350	372	278
12922	NM_001288618,NM_001288619,NM_001288620,NM_009953,XM_006505482	Crhr2	corticotropin releasing hormone receptor 2	protein_coding	NP_001275547.1;NP_001275548.1;NP_001275549.1;NP_034083.2;XP_006505545.1	894312	.	108	29	48	47	56	30
12925	NM_007763	Crip1	cysteine-rich protein 1 (intestinal)	protein_coding	NP_031789.1	88501	.	116	144	122	141	112	136
12927	NM_001198839,NM_009954	Bcar1	breast cancer anti-estrogen resistance 1	protein_coding	NP_001185768.1;NP_034084.2	108091	.	2645	3361	2949	2899	2439	2116
12928	NM_001277219,NM_001277221,NM_133656,XM_006532124,XM_006532125	Crk	v-crk avian sarcoma virus CT10 oncogene homolog	protein_coding	NP_001264148.1;NP_001264150.1;NP_598417.2;XP_006532187.1;XP_006532188.1	88508	.	7219	7591	7474	7609	7658	6972
12929	NM_001277231,NM_007764	Crkl	v-crk avian sarcoma virus CT10 oncogene homolog-like	protein_coding	NP_001264160.1;NP_031790.2	104686	.	2645	2975	2934	2908	3008	2955
12931	NM_001378799,NM_001378800,NM_001378801,NM_001378802,NM_001378803,NM_018827,XM_006509541	Crlf1	cytokine receptor-like factor 1	protein_coding	NP_001365728.1;NP_001365729.1;NP_001365730.1;NP_001365731.1;NP_001365732.1;NP_061297.1;XP_006509604.1	1340030	.	680	771	827	897	700	421
12933	NM_001136058,NM_007765	Crmp1	collapsin response mediator protein 1	protein_coding	NP_001129530.1;NP_031791.3	107793	.	10627	9991	11800	11776	11279	9203
12934	NM_001378767,NM_009955	Dpysl2	dihydropyrimidinase-like 2	protein_coding	NP_001365696.1;NP_034085.2	1349763	.	5200	5742	5624	5493	5856	5502
12936	NM_007766	Pcdha4	protocadherin alpha 4	protein_coding	NP_031792.1	1298406	.	704	726	623	842	620	428
12937	NM_007767	Pcdha6	protocadherin alpha 6	protein_coding	NP_031793.2	1298367	.	328	535	244	317	306	357
12939	NM_009957	Pcdha7	protocadherin alpha 7	protein_coding	NP_034087.2	1298369	.	104	179	323	449	200	263
12941	NM_009959	Pcdha5	protocadherin alpha 5	protein_coding	NP_034089.1	1298371	.	398	301	422	580	376	615
12942	NM_009960	Pcdha11	protocadherin alpha 11	protein_coding	NP_034090.1	1298372	.	288	209	209	159	367	134
12943	NM_009961	Pcdha10	protocadherin alpha 10	protein_coding	NP_034091.1	1298408	.	432	253	302	236	454	350
12944	NM_007768	Crp	C-reactive protein, pentraxin-related	protein_coding	NP_031794.3	88512	.	0	0	0	0	0	0
12945	NM_001347632,NM_007769,XM_006507298,XM_006507299,XM_006507300,XM_006507301,XM_006507302,XM_006507304,XM_006507305,XM_006507306,XM_006507307	Dmbt1	deleted in malignant brain tumors 1	protein_coding	NP_001334561.1;NP_031795.2;XP_006507361.1;XP_006507362.1;XP_006507363.1;XP_006507364.1;XP_006507365.1;XP_006507367.1;XP_006507368.1;XP_006507369.1;XP_006507370.1	106210	.	0	0	0	0	0	0
12946	NM_001355060,NM_001355061,NM_013499	Cr1l	complement component (3b/4b) receptor 1-like	protein_coding	NP_001341989.1;NP_001341990.1;NP_038527.2	88513	.	575	669	619	614	563	642
12950	NM_013500,XM_006517075	Hapln1	hyaluronan and proteoglycan link protein 1	protein_coding	NP_038528.3;XP_006517138.1	1337006	.	1289	1171	1178	1195	1161	1450
12951	NM_001113330,NM_007770	Crx	cone-rod homeobox	protein_coding	NP_001106801.1;NP_031796.1	1194883	.	0	0	0	0	0	0
12952	NM_007771,XM_011243348,XM_011243349,XM_030244860	Cry1	cryptochrome 1 (photolyase-like)	protein_coding	NP_031797.1;XP_011241650.1;XP_011241651.1;XP_030100720.1	1270841	.	501	715	554	590	497	608
12953	NM_009963,XM_017315281,XM_030247073	Cry2	cryptochrome 2 (photolyase-like)	protein_coding	NP_034093.1;XP_017170770.1;XP_030102933.1	1270859	.	5904	6154	6503	6180	6340	5577
12954	NM_001278569,NM_001278570,NM_013501	Cryaa	crystallin, alpha A	protein_coding	NP_001265498.1;NP_001265499.1;NP_038529.1	88515	.	3	6	8	6	11	9
12955	NM_001289782,NM_001289784,NM_001289785,NM_009964,XM_006509970,XM_030244036	Cryab	crystallin, alpha B	protein_coding	NP_001276711.1;NP_001276713.1;NP_001276714.1;NP_034094.1;XP_006510033.1;XP_030099896.1	88516	.	4112	7231	4612	4910	3735	5111
12957	NM_001313933,NM_009965	Cryba1	crystallin, beta A1	protein_coding	NP_001300862.1;NP_034095.1	88518	.	0	0	5	0	0	3
12958	NM_021541,XM_006495656	Cryba2	crystallin, beta A2	protein_coding	NP_067516.1;XP_006495719.1	104336	.	5	12	11	10	2	8
12959	NM_001312884,NM_021351,XM_006534749	Cryba4	crystallin, beta A4	protein_coding	NP_001299813.1;NP_067326.1;XP_006534812.1	102716	.	13	37	19	18	16	17
12960	NM_001312893,NM_001312894,NM_001312895,NM_023695,XM_006534752,XM_006534753,XM_006534754,XM_006534755,XM_006534756,XM_006534757	Crybb1	crystallin, beta B1	protein_coding	NP_001299822.1;NP_001299823.1;NP_001299824.1;NP_076184.1;XP_006534815.1;XP_006534816.1;XP_006534817.1;XP_006534818.1;XP_006534819.1;XP_006534820.1	104992	.	78	143	117	117	99	111
12961	NM_007773,XM_006534759,XM_006534760,XM_017320652	Crybb2	crystallin, beta B2	protein_coding	NP_031799.1;XP_006534822.1;XP_006534823.2;XP_017176141.1	88519	.	0	0	0	0	0	0
12962	NM_001159650,NM_001359004,NM_001359005,NM_001359006,NM_001359007,NM_001359008,NM_021352,XM_011249404,XM_030254104	Crybb3	crystallin, beta B3	protein_coding	NP_001153122.1;NP_001345933.1;NP_001345934.1;NP_001345935.1;NP_001345936.1;NP_001345937.1;NP_067327.1;XP_011247706.1;XP_030109964.1	102717	.	18	38	19	29	20	12
12964	NM_007774	Cryga	crystallin, gamma A	protein_coding	NP_031800.1	88521	.	15	12	4	17	5	2
12965	NM_144761	Crygb	crystallin, gamma B	protein_coding	NP_658906.1	88522	.	0	0	0	0	0	0
12966	NM_001082573,NM_007775	Crygc	crystallin, gamma C	protein_coding	NP_001076042.1;NP_031801.1	88523	.	0	0	0	0	0	0
12967	NM_007776	Crygd	crystallin, gamma D	protein_coding	NP_031802.2	88524	.	0	0	0	0	0	0
12968	NM_007777,XM_030246091	Cryge	crystallin, gamma E	protein_coding	NP_031803.3;XP_030101951.1	88525	.	0	0	0	0	0	0
12969	NM_001360779,NM_027010	Crygf	crystallin, gamma F	protein_coding	NP_001347708.1;NP_081286.1	88526	.	0	0	0	0	0	0
12970	NM_009967,XM_006521755	Crygs	crystallin, gamma S	protein_coding	NP_034097.1;XP_006521818.1	1298216	.	0	0	4	0	0	0
12971	NM_016669	Crym	crystallin, mu	protein_coding	NP_057878.1	102675	.	6797	7272	6657	7762	9260	9457
12972	NM_001357672,NM_001357673,NM_001357674,NM_001357675,NM_001357676,NM_009968,NR_151773,NR_151774	Cryz	crystallin, zeta	protein_coding	NP_001344601.1;NP_001344602.1;NP_001344603.1;NP_001344604.1;NP_001344605.1;NP_034098.1	88527	.	568	650	616	629	526	675
12974	NM_026444,XM_030244861	Cs	citrate synthase	protein_coding	NP_080720.1;XP_030100721.1	88529	.	11758	12176	12335	12530	12336	10005
12977	NM_001113529,NM_001113530,NM_007778	Csf1	colony stimulating factor 1 (macrophage)	protein_coding	NP_001107001.1;NP_001107002.1;NP_031804.3	1339753	.	1294	2136	1536	1582	1269	1569
12978	NM_001037859	Csf1r	colony stimulating factor 1 receptor	protein_coding	NP_001032948.2	1339758	.	4313	7327	4895	6163	3857	5997
12981	NM_009969,XM_006532127	Csf2	colony stimulating factor 2 (granulocyte-macrophage)	protein_coding	NP_034099.2;XP_006532190.1	1339752	.	0	0	0	0	0	0
12982	NM_009970,XM_011247130,XM_011247131,XM_011247132,XM_011247134,XM_017318052,XM_030250736,XR_003952743,XR_003952744,XR_003952745,XR_003952746,XR_003952747,XR_003952748,XR_003952749,XR_877658,XR_877659	Csf2ra	colony stimulating factor 2 receptor, alpha, low-affinity (granulocyte-macrophage)	protein_coding	NP_034100.2;XP_011245432.1;XP_011245433.1;XP_011245434.1;XP_011245436.1;XP_017173541.1;XP_030106596.1	1339754	.	163	220	271	247	227	202
12983	NM_001358854,NM_007780	Csf2rb	colony stimulating factor 2 receptor, beta, low-affinity (granulocyte-macrophage)	protein_coding	NP_001345783.1;NP_031806.3	1339759	.	29	64	44	78	44	66
12984	NM_001287389,NM_007781	Csf2rb2	colony stimulating factor 2 receptor, beta 2, low-affinity (granulocyte-macrophage)	protein_coding	NP_001274318.1;NP_031807.1	1339760	.	22	54	46	35	25	39
12985	NM_009971,XM_006532128,XM_030245517	Csf3	colony stimulating factor 3 (granulocyte)	protein_coding	NP_034101.1;XP_006532191.3;XP_030101377.1	1339751	.	0	0	0	0	0	0
12986	NM_001252651,NM_007782,NR_045561,XM_006502708,XM_006502709,XM_006502710,XM_006502711,XM_006502712,XM_006502713,XM_006502714,XM_006502716,XM_006502717,XM_006502718,XM_006502719,XM_011240421,XM_011240422,XM_011240423,XM_017319944,XM_017319945,XM_030253157,XM_030253158,XM_030253159,XM_030253160,XM_030253161,XM_030253162	Csf3r	colony stimulating factor 3 receptor (granulocyte)	protein_coding	NP_001239580.1;NP_031808.2;XP_006502771.1;XP_006502772.1;XP_006502773.1;XP_006502774.1;XP_006502775.1;XP_006502776.1;XP_006502777.1;XP_006502779.1;XP_006502780.1;XP_006502781.1;XP_006502782.1;XP_011238723.1;XP_011238724.1;XP_011238725.1;XP_017175433.1;XP_017175434.1;XP_030109017.1;XP_030109018.1;XP_030109019.1;XP_030109020.1;XP_030109021.1;XP_030109022.1	1339755	.	145	283	155	172	105	190
12988	NM_001304761,NM_007783,XM_006510801,XM_006510802,XM_011242659,XM_030244037,XM_030244038,XM_030244039	Csk	c-src tyrosine kinase	protein_coding	NP_001291690.1;NP_031809.2;XP_006510864.1;XP_006510865.1;XP_011240961.1;XP_030099897.1;XP_030099898.1;XP_030099899.1	88537	.	792	1054	973	961	849	870
12990	NM_001286015,NM_001286016,NM_007784	Csn1s1	casein alpha s1	protein_coding	NP_001272944.1;NP_001272945.1;NP_031810.1	88540	.	0	0	0	0	0	0
12991	NM_001286020,NM_001286021,NM_001286022,NM_001286023,NM_001286024,NM_009972,XR_389259	Csn2	casein beta	protein_coding	NP_001272949.1;NP_001272950.1;NP_001272951.1;NP_001272952.1;NP_001272953.1;NP_034102.1	88541	.	0	0	0	0	0	0
12992	NM_001301334,NM_001301335,NM_009973	Csn1s2b	casein alpha s2-like B	protein_coding	NP_001288263.1;NP_001288264.1;NP_034103.2	105312	.	0	0	0	0	0	0
12993	NM_001304765,NM_001304767,NM_001304768,NM_001304769,NM_007785	Csn1s2a	casein alpha s2-like A	protein_coding	NP_001291694.1;NP_001291696.1;NP_001291697.1;NP_001291698.1;NP_031811.1	88542	.	0	0	0	0	0	0
12994	NM_001356570,NM_001356571,NM_007786	Csn3	casein kappa	protein_coding	NP_001343499.1;NP_001343500.1;NP_031812.2	107461	.	0	0	0	0	0	0
12995	NM_007788,XM_006498657,XM_011239272,XM_030247074,XM_030247075,XM_030247076	Csnk2a1	casein kinase 2, alpha 1 polypeptide	protein_coding	NP_031814.2;XP_006498720.1;XP_011237574.1;XP_030102934.1;XP_030102935.1;XP_030102936.1	88543	.	5387	5607	5125	5301	5125	4832
13000	NM_009974,XM_006530641,XM_006530642,XM_006530643,XM_017312556,XM_030243279	Csnk2a2	casein kinase 2, alpha prime polypeptide	protein_coding	NP_034104.1;XP_006530704.1;XP_006530705.1;XP_006530706.1;XP_017168045.1;XP_030099139.1	88547	.	1327	1316	1373	1246	1309	1001
13001	NM_001303445,NM_001303446,NM_001303476,NM_009975	Csnk2b	casein kinase 2, beta polypeptide	protein_coding	NP_001290374.1;NP_001290375.1;NP_001290405.1;NP_034105.1	88548	.	2827	2965	2835	2829	2742	2307
13002	NM_001271584,NM_001271585,NM_016775,NR_073369,XM_011239923,XR_003950402,XR_003950403,XR_003950404,XR_003950405,XR_867108	Dnajc5	DnaJ heat shock protein family (Hsp40) member C5	protein_coding	NP_001258513.1;NP_001258514.1;NP_058055.1;XP_011238225.1	892995	.	14100	14286	15318	15075	14518	12400
13003	NM_001081249,NM_001134474,NM_001134475,NM_019389,NM_172955,XM_011244470,XM_011244471	Vcan	versican	protein_coding	NP_001074718.1;NP_001127946.1;NP_001127947.1;NP_062262.2;NP_766543.1;XP_011242772.1;XP_011242773.1	102889	.	755	1063	973	825	641	876
13004	NM_007789,XM_006509543	Ncan	neurocan	protein_coding	NP_031815.2;XP_006509606.1	104694	.	9115	7915	10935	9083	8286	6548
13006	NM_007790	Smc3	structural maintenance of chromosomes 3	protein_coding	NP_031816.2	1339795	.	2992	3303	3062	3126	2933	3284
13007	NM_001360782,NM_007791,NR_153810	Csrp1	cysteine and glycine-rich protein 1	protein_coding	NP_001347711.1;NP_031817.1	88549	.	10912	20046	13451	13823	9873	14754
13008	NM_007792	Csrp2	cysteine and glycine-rich protein 2	protein_coding	NP_031818.3	1202907	.	223	247	132	166	141	190
13009	NM_001198841,NM_013808	Csrp3	cysteine and glycine-rich protein 3	protein_coding	NP_001185770.1;NP_038836.1	1330824	.	0	0	0	0	0	0
13010	NM_009976	Cst3	cystatin C	protein_coding	NP_034106.2	102519	.	30863	57696	41647	49534	35560	46547
13011	NM_009977	Cst7	cystatin F (leukocystatin)	protein_coding	NP_034107.2	1298217	.	14	49	8	27	10	35
13012	NM_009978,XM_006498658,XM_006498659	Cst8	cystatin 8 (cystatin-related epididymal spermatogenic)	protein_coding	NP_034108.1;XP_006498721.1;XP_006498722.1	107161	.	0	0	0	0	0	0
13013	NM_009979	Cst9	cystatin 9	protein_coding	NP_034109.1	1340053	.	0	0	0	0	0	0
13014	NM_007793	Cstb	cystatin B	protein_coding	NP_031819.1	109514	.	441	608	510	564	530	615
13016	NM_001198859,NM_001198860,NM_001198861,NM_001310535,NM_013502,XM_030254105	Ctbp1	C-terminal binding protein 1	protein_coding	NP_001185788.1;NP_001185789.1;NP_001185790.1;NP_001297464.1;NP_038530.1;XP_030109965.1	1201685	.	6687	6936	7717	7157	6760	6059
13017	NM_001170744,NM_001347623,NM_009980,XM_006507308,XM_006507309,XM_006507310,XM_006507311,XM_006507312,XM_030242064,XM_030242065,XM_030242066,XM_030242067,XM_030242068,XM_030242069,XM_030242070	Ctbp2	C-terminal binding protein 2	protein_coding	NP_001164215.1;NP_001334552.1;NP_034110.1;XP_006507371.1;XP_006507372.1;XP_006507373.1;XP_006507374.1;XP_006507375.1;XP_030097924.1;XP_030097925.1;XP_030097926.1;XP_030097927.1;XP_030097928.1;XP_030097929.1;XP_030097930.1	1201686	.	1068	1151	1149	1110	1040	1013
13018	NM_001358924,NM_181322,XM_006530646,XM_006530647,XM_006530648,XM_030243280,XM_030243281,XM_030243282,XM_030243283	Ctcf	CCCTC-binding factor	protein_coding	NP_001345853.1;NP_851839.1;XP_006530709.1;XP_006530710.1;XP_006530711.1;XP_030099140.1;XP_030099141.1;XP_030099142.1;XP_030099143.1	109447	.	2993	3337	3213	3425	2954	2954
13019	NM_001301282,NM_001301283,NM_007795,XM_006507316,XM_030242071,XM_030242072,XM_030242073,XM_030242074	Ctf1	cardiotrophin 1	protein_coding	NP_001288211.1;NP_001288212.1;NP_031821.1;XP_006507379.1;XP_030097931.1;XP_030097932.1;XP_030097933.1;XP_030097934.1	105115	.	36	66	35	52	25	56
13024	NM_001145799,NM_007796	Ctla2a	cytotoxic T lymphocyte-associated protein 2 alpha	protein_coding	NP_001139271.1;NP_031822.2	88554	.	112	145	137	132	141	123
13025	NM_001145801,NM_007797,XM_011244472,XR_382421	Ctla2b	cytotoxic T lymphocyte-associated protein 2 beta	protein_coding	NP_001139273.1;NP_031823.1;XP_011242774.1	88555	.	17	27	27	26	21	35
13026	NM_001163159,NM_001163160,NM_009981	Pcyt1a	phosphate cytidylyltransferase 1, choline, alpha isoform	protein_coding	NP_001156631.1;NP_001156632.1;NP_034111.1	88557	.	1628	2094	1705	1717	1523	1606
13030	NM_007798,XM_017315833	Ctsb	cathepsin B	protein_coding	NP_031824.1;XP_017171322.1	88561	.	22914	26228	24001	24903	23048	21891
13032	NM_001311790,NM_009982,XM_006507320	Ctsc	cathepsin C	protein_coding	NP_001298719.1;NP_034112.3;XP_006507383.1	109553	.	624	855	576	587	478	568
13033	NM_009983	Ctsd	cathepsin D	protein_coding	NP_034113.1	88562	.	17227	22038	16549	18997	15541	17543
13034	NM_007799	Ctse	cathepsin E	protein_coding	NP_031825.2	107361	.	6	0	0	2	0	0
13035	NM_007800	Ctsg	cathepsin G	protein_coding	NP_031826.1	88563	.	0	0	0	0	0	0
13036	NM_001312649,NM_007801,XM_011242660	Ctsh	cathepsin H	protein_coding	NP_001299578.1;NP_031827.2;XP_011240962.1	107285	.	402	791	362	500	358	571
13038	NM_007802,XM_006500974	Ctsk	cathepsin K	protein_coding	NP_031828.2;XP_006501037.1	107823	.	38	66	53	72	48	59
13039	NM_009984,XM_006517080	Ctsl	cathepsin L	protein_coding	NP_034114.1;XP_006517143.1	88564	.	3393	4612	3382	3664	3123	3484
13040	NM_001267695,NM_021281,XM_006500975	Ctss	cathepsin S	protein_coding	NP_001254624.2;NP_067256.4;XP_006501038.2	107341	.	3227	7371	3442	5050	3150	5934
13041	NM_009985,XM_006531661,XR_879413	Ctsw	cathepsin W	protein_coding	NP_034115.2;XP_006531724.1	1338045	.	0	10	13	4	0	0
13043	NM_001252572,NM_001357116,NM_007803,XR_001785469,XR_003946381,XR_003946382	Cttn	cortactin	protein_coding	NP_001239501.1;NP_001344045.1;NP_031829.2	99695	.	7521	7412	7924	7655	7563	6841
13046	NM_001244891,NM_001244903,NM_017368,NM_198683,XM_006498669,XM_017315295,XM_030247083,XM_030247084,XM_030247086,XM_030247094,XM_030247101,XM_030247102,XM_030247106,XM_030247109,XM_030247110,XM_030247111,XM_030247112,XM_030247114,XM_030247115,XM_030247118,XM_030247119,XM_030247123	Celf1	CUGBP, Elav-like family member 1	protein_coding	NP_001231820.1;NP_001231832.1;NP_059064.2;NP_941955.1;XP_006498732.1;XP_017170784.1;XP_030102943.1;XP_030102944.1;XP_030102946.1;XP_030102954.1;XP_030102961.1;XP_030102962.1;XP_030102966.1;XP_030102969.1;XP_030102970.1;XP_030102971.1;XP_030102972.1;XP_030102974.1;XP_030102975.1;XP_030102978.1;XP_030102979.1;XP_030102983.1	1342295	.	8164	7787	8672	8569	7723	7363
13047	NM_001291233,NM_001291234,NM_001291238,NM_001291239,NM_001291240,NM_009986,NM_198602,XM_006504350,XM_006504352,XM_006504354,XM_006504356,XM_017320654,XM_030254106,XM_030254107,XM_030254108,XM_030254109,XM_030254110,XM_030254111,XM_030254112,XM_030254113,XM_030254114,XM_030254115	Cux1	cut-like homeobox 1	protein_coding	NP_001278162.1;NP_001278163.1;NP_001278167.1;NP_001278168.1;NP_001278169.1;NP_034116.3;NP_941004.2;XP_006504413.1;XP_006504415.1;XP_006504417.1;XP_006504419.1;XP_017176143.1;XP_030109966.1;XP_030109967.1;XP_030109968.1;XP_030109969.1;XP_030109970.1;XP_030109971.1;XP_030109972.1;XP_030109973.1;XP_030109974.1;XP_030109975.1	88568	.	1436	1631	1507	1520	1334	1462
13048	NM_001312908,NM_007804,XM_006530157,XM_011248166,XM_011248167,XM_011248168,XM_011248169,XM_011248170,XM_011248171,XM_011248172,XM_011248173,XM_011248174,XM_011248176,XM_017320655,XM_030254116,XM_030254117,XM_030254118,XM_030254119,XM_030254120	Cux2	cut-like homeobox 2	protein_coding	NP_001299837.1;NP_031830.2;XP_006530220.1;XP_011246468.1;XP_011246469.1;XP_011246470.1;XP_011246471.1;XP_011246472.1;XP_011246473.2;XP_011246474.1;XP_011246475.1;XP_011246476.1;XP_011246478.1;XP_017176144.1;XP_030109976.1;XP_030109977.1;XP_030109978.1;XP_030109979.1;XP_030109980.1	107321	.	654	571	782	622	698	551
13051	NM_009987,XM_011242934	Cx3cr1	chemokine (C-X3-C motif) receptor 1	protein_coding	NP_034117.3;XP_011241236.1	1333815	.	2145	4087	2570	3019	2008	3211
13052	NM_001025192,NM_001276263,NM_009988,XM_006522883,XM_006522884,XM_017316864,XM_030248956	Cxadr	coxsackie virus and adenovirus receptor	protein_coding	NP_001020363.1;NP_001263192.1;NP_034118.1;XP_006522946.1;XP_006522947.1;XP_017172353.1;XP_030104816.1	1201679	.	580	523	373	422	443	448
13056	NM_001356374,NM_007805,XM_006532131,XM_006532132,XM_006532133,XM_006532134	Cyb561	cytochrome b-561	protein_coding	NP_001343303.1;NP_031831.2;XP_006532194.1;XP_006532195.1;XP_006532196.1;XP_006532197.1	103253	.	1666	1268	1400	1267	1463	1442
13057	NM_001301284,NM_007806	Cyba	cytochrome b-245, alpha polypeptide	protein_coding	NP_001288213.1;NP_031832.2	1316658	.	184	405	226	269	186	309
13058	NM_007807,XM_006527565	Cybb	cytochrome b-245, beta polypeptide	protein_coding	NP_031833.3;XP_006527628.1	88574	.	27	37	10	18	9	24
13063	NM_007808	Cycs	cytochrome c, somatic	protein_coding	NP_031834.1	88578	.	4807	4778	4898	4787	4814	4156
13064	gene-Cycs-ps1	Cycs-ps1	cytochrome c, pseudogene 1	pseudogene	.	109500	.	0	2	0	0	0	0
13065	gene-Cycs-ps2	Cycs-ps2	cytochrome c, pseudogene 2	pseudogene	.	109499	.	0	1	0	0	1	0
13066	gene-Cycs-ps3	Cycs-ps3	cytochrome c, pseudogene 3	pseudogene	.	109498	.	0	0	0	0	0	0
13067	NM_009989,XM_011239273	Cyct	cytochrome c, testis	protein_coding	NP_034119.1;XP_011237575.1	88579	.	0	0	15	0	7	8
13070	NM_001346787,NM_019779	Cyp11a1	cytochrome P450, family 11, subfamily a, polypeptide 1	protein_coding	NP_001333716.1;NP_062753.3	88582	.	169	246	183	206	170	133
13072	NM_009991	Cyp11b2	cytochrome P450, family 11, subfamily b, polypeptide 2	protein_coding	NP_034121.4	88584	.	0	0	0	0	0	0
13074	NM_007809	Cyp17a1	cytochrome P450, family 17, subfamily a, polypeptide 1	protein_coding	NP_031835.3	88586	.	0	0	0	0	0	0
13075	NM_001348171,NM_001348172,NM_001348173,NM_007810	Cyp19a1	cytochrome P450, family 19, subfamily a, polypeptide 1	protein_coding	NP_001335100.1;NP_001335101.1;NP_001335102.1;NP_031836.1	88587	.	6	0	2	4	0	6
13076	NM_001136059,NM_009992	Cyp1a1	cytochrome P450, family 1, subfamily a, polypeptide 1	protein_coding	NP_001129531.1;NP_034122.1	88588	.	0	10	8	11	4	2
13077	NM_009993	Cyp1a2	cytochrome P450, family 1, subfamily a, polypeptide 2	protein_coding	NP_034123.1	88589	.	0	0	0	0	0	0
13078	NM_001364889,NM_009994	Cyp1b1	cytochrome P450, family 1, subfamily b, polypeptide 1	protein_coding	NP_001351818.1;NP_034124.1	88590	.	95	181	141	130	97	172
13079	NM_009995	Cyp21a1	cytochrome P450, family 21, subfamily a, polypeptide 1	protein_coding	NP_034125.2	88591	.	0	0	0	0	0	0
13081	NM_009996	Cyp24a1	cytochrome P450, family 24, subfamily a, polypeptide 1	protein_coding	NP_034126.1	88593	.	0	0	0	0	0	0
13082	NM_007811,XM_017318053	Cyp26a1	cytochrome P450, family 26, subfamily a, polypeptide 1	protein_coding	NP_031837.2;XP_017173542.1	1096359	.	0	4	0	0	14	24
13085	NM_133657	Cyp2a12	cytochrome P450, family 2, subfamily a, polypeptide 12	protein_coding	NP_598418.1	105055	.	0	0	0	0	0	0
13086	NM_009997	Cyp2a4	cytochrome P450, family 2, subfamily a, polypeptide 4	protein_coding	NP_034127.2	88596	.	0	0	0	0	0	0
13087	NM_007812	Cyp2a5	cytochrome P450, family 2, subfamily a, polypeptide 5	protein_coding	NP_031838.2	88597	.	2	6	0	2	0	0
13088	NM_009999	Cyp2b10	cytochrome P450, family 2, subfamily b, polypeptide 10	protein_coding	NP_034129.1	88598	.	0	0	0	0	0	0
13089	NM_007813,XM_006539508,XM_006539509,XM_006539510,XM_006539511	Cyp2b13	cytochrome P450, family 2, subfamily b, polypeptide 13	protein_coding	NP_031839.2;XP_006539571.1;XP_006539572.1;XP_006539573.1;XP_006539574.1	88599	.	0	0	0	0	0	0
13090	NM_007814	Cyp2b19	cytochrome P450, family 2, subfamily b, polypeptide 19	protein_coding	NP_031840.1	107303	.	0	0	0	0	0	0
13094	NM_010000,XM_011250431	Cyp2b9	cytochrome P450, family 2, subfamily b, polypeptide 9	protein_coding	NP_034130.1;XP_011248733.1	88600	.	0	0	0	0	0	0
13095	NM_007815,XM_006526636	Cyp2c29	cytochrome P450, family 2, subfamily c, polypeptide 29	protein_coding	NP_031841.3;XP_006526699.1	103238	.	0	0	0	0	0	0
13096	NM_010001	Cyp2c37	cytochrome P450, family 2. subfamily c, polypeptide 37	protein_coding	NP_034131.2	1306806	.	0	0	0	0	0	0
13097	NM_010002,XM_017318054	Cyp2c38	cytochrome P450, family 2, subfamily c, polypeptide 38	protein_coding	NP_034132.2;XP_017173543.1	1306819	.	0	0	0	0	0	0
13098	NM_001373937,NM_010003	Cyp2c39	cytochrome P450, family 2, subfamily c, polypeptide 39	protein_coding	NP_001360866.1;NP_034133.2	1306818	.	0	0	0	0	0	0
13099	NM_010004	Cyp2c40	cytochrome P450, family 2, subfamily c, polypeptide 40	protein_coding	NP_034134.3	1306815	.	0	0	0	0	0	0
13101	NM_010005,XM_006520391	Cyp2d10	cytochrome P450, family 2, subfamily d, polypeptide 10	protein_coding	NP_034135.2;XP_006520454.1	88602	.	0	0	0	0	0	0
13105	NM_010006	Cyp2d9	cytochrome P450, family 2, subfamily d, polypeptide 9	protein_coding	NP_034136.2	88606	.	0	0	0	3	2	0
13106	NM_021282	Cyp2e1	cytochrome P450, family 2, subfamily e, polypeptide 1	protein_coding	NP_067257.1	88607	.	0	11	5	10	4	0
13107	NM_007817	Cyp2f2	cytochrome P450, family 2, subfamily f, polypeptide 2	protein_coding	NP_031843.2	88608	.	0	4	0	0	0	0
13108	NM_013809	Cyp2g1	cytochrome P450, family 2, subfamily g, polypeptide 1	protein_coding	NP_038837.1	109612	.	2	0	0	0	0	0
13109	NM_010007,XM_006502720	Cyp2j5	cytochrome P450, family 2, subfamily j, polypeptide 5	protein_coding	NP_034137.1;XP_006502783.1	1270149	.	0	0	0	0	0	0
13110	NM_010008,XM_006502721,XM_006502722,XM_011240424,XM_030253163	Cyp2j6	cytochrome P450, family 2, subfamily j, polypeptide 6	protein_coding	NP_034138.3;XP_006502784.1;XP_006502785.1;XP_011238726.1;XP_030109023.1	1270148	.	941	1185	818	990	933	1049
13112	NM_007818	Cyp3a11	cytochrome P450, family 3, subfamily a, polypeptide 11	protein_coding	NP_031844.1	88609	.	0	0	0	0	0	0
13113	NM_007819,XM_030254121,XR_003955579	Cyp3a13	cytochrome P450, family 3, subfamily a, polypeptide 13	protein_coding	NP_031845.1;XP_030109981.1	88610	.	5	15	10	6	0	8
13114	NM_007820,XM_006504799	Cyp3a16	cytochrome P450, family 3, subfamily a, polypeptide 16	protein_coding	NP_031846.2;XP_006504862.1	106099	.	0	0	0	0	0	0
13115	NM_010009,XM_006513187	Cyp27b1	cytochrome P450, family 27, subfamily b, polypeptide 1	protein_coding	NP_034139.2;XP_006513250.1	1098274	.	5	10	5	3	7	4
13116	NM_010010,XM_030246535,XR_381477	Cyp46a1	cytochrome P450, family 46, subfamily a, polypeptide 1	protein_coding	NP_034140.1;XP_030102395.1	1341877	.	3842	3641	4246	4234	4297	3933
13117	NM_010011	Cyp4a10	cytochrome P450, family 4, subfamily a, polypeptide 10	protein_coding	NP_034141.3	88611	.	0	0	0	0	0	0
13118	NM_172306	Cyp4a12b	cytochrome P450, family 4, subfamily a, polypeptide 12B	protein_coding	NP_758510.2	3611747	.	0	0	0	0	0	0
13119	NM_007822,XM_006502724,XM_017319946	Cyp4a14	cytochrome P450, family 4, subfamily a, polypeptide 14	protein_coding	NP_031848.1;XP_006502787.2;XP_017175435.1	1096550	.	0	0	0	0	0	0
13120	NM_007823	Cyp4b1	cytochrome P450, family 4, subfamily b, polypeptide 1	protein_coding	NP_031849.1	103225	.	0	0	12	4	10	22
13121	NM_020010	Cyp51	cytochrome P450, family 51	protein_coding	NP_064394.2	106040	.	2767	2611	2867	2658	2862	2699
13122	NM_007824	Cyp7a1	cytochrome P450, family 7, subfamily a, polypeptide 1	protein_coding	NP_031850.2	106091	.	0	0	0	0	0	0
13123	NM_007825,XM_006535383,XM_006535384	Cyp7b1	cytochrome P450, family 7, subfamily b, polypeptide 1	protein_coding	NP_031851.3;XP_006535446.1;XP_006535447.1	104978	.	1154	1381	1257	1356	1142	911
13124	NM_010012	Cyp8b1	cytochrome P450, family 8, subfamily b, polypeptide 1	protein_coding	NP_034142.3	1338044	.	0	0	0	0	0	0
13131	NM_001369046,NM_001369047,NM_001369048,NM_001369049,NM_010014,NM_177259,NR_104385,XM_006502725,XM_006502726,XM_006502727,XM_006502735,XM_011240426,XM_017319948,XM_017319949,XM_017319950,XM_030253165,XM_030253166,XM_030253167,XM_030253169,XM_030253170,XM_030253171,XM_030253172,XM_030253173,XM_030253174,XM_030253175,XM_030253176,XM_030253177,XM_030253178,XM_030253179,XM_030253180,XM_030253182	Dab1	disabled 1	protein_coding	NP_001355975.1;NP_001355976.1;NP_001355977.1;NP_001355978.1;NP_034144.1;NP_796233.2;XP_006502788.1;XP_006502789.1;XP_006502790.1;XP_006502798.1;XP_011238728.1;XP_017175437.1;XP_017175438.1;XP_017175439.1;XP_030109025.1;XP_030109026.1;XP_030109027.1;XP_030109029.1;XP_030109030.1;XP_030109031.1;XP_030109032.1;XP_030109033.1;XP_030109034.1;XP_030109035.1;XP_030109036.1;XP_030109037.1;XP_030109038.1;…	108554	.	5440	5750	6221	6119	5704	5694
13132	NM_001008702,NM_001037905,NM_001102400,NM_001310446,NM_023118,XM_011245324,XM_017316424,XM_030248312,XM_030248313	Dab2	disabled 2, mitogen-responsive phosphoprotein	protein_coding	NP_001008702.1;NP_001032994.1;NP_001095870.1;NP_001297375.1;NP_075607.2;XP_011243626.1;XP_017171913.1;XP_030104172.1;XP_030104173.1	109175	.	428	342	228	253	245	283
13134	NM_001038610,NM_007826	Dach1	dachshund family transcription factor 1	protein_coding	NP_001033699.1;NP_031852.1	1277991	.	212	137	232	222	196	220
13135	NM_001113358,NM_010015	Dad1	defender against cell death 1	protein_coding	NP_001106829.1;NP_034145.1	101912	.	1893	2189	2107	2169	1916	1766
13136	NM_010016,XM_006529115,XM_006529117,XM_030246237,XR_003949488,XR_003949492	Cd55	CD55 molecule, decay accelerating factor for complement	protein_coding	NP_034146.2;XP_006529178.1;XP_006529180.1;XP_030102097.1	104850	.	282	205	235	180	184	186
13137	NM_001317361,NM_007827,XM_011247917,XM_017314396,XM_030246278,XM_030246295	Cd55b	CD55 molecule, decay accelerating factor for complement B	protein_coding	NP_001304290.1;NP_031853.2;XP_011246219.1;XP_017169885.1;XP_030102138.1;XP_030102155.1	104849	.	0	0	0	0	6	0
13138	NM_001276481,NM_001276482,NM_001276485,NM_001276486,NM_001276492,NM_001276493,NM_010017,XM_006511636,XM_030244040,XM_030244041	Dag1	dystroglycan 1	protein_coding	NP_001263410.1;NP_001263411.1;NP_001263414.1;NP_001263415.1;NP_001263421.1;NP_001263422.1;NP_034147.1;XP_006511699.1;XP_030099900.1;XP_030099901.1	101864	.	5722	6391	5972	6073	5302	5368
13139	NM_001358745,NM_001358746,NM_001372366,NM_001374028,NM_016811,XM_011243351,XM_011243359,XM_011243363,XM_017313786,XM_017313790,XM_030244864,XM_030244865,XR_001779449,XR_001779451,XR_003948587,XR_380362	Dgka	diacylglycerol kinase, alpha	protein_coding	NP_001345674.1;NP_001345675.1;NP_001359295.1;NP_001360957.1;NP_058091.2;XP_011241653.1;XP_011241661.1;XP_011241665.1;XP_017169275.1;XP_017169279.1;XP_030100724.1;XP_030100725.1	102952	.	317	378	393	363	338	297
13142	NM_001286396,NM_001286397,NM_010018,XM_006530161,XM_006530162	Dao	D-amino acid oxidase	protein_coding	NP_001273325.1;NP_001273326.1;NP_034148.2;XP_006530224.1;XP_006530225.1	94859	.	7	6	4	0	0	8
13143	NM_010019,XM_006510811	Dapk2	death-associated protein kinase 2	protein_coding	NP_034149.2;XP_006510874.1	1341297	.	23	55	41	44	22	38
13144	NM_001190473,NM_001190474,NM_007828,XM_006513194,XM_006513195,XM_030244866	Dapk3	death-associated protein kinase 3	protein_coding	NP_001177402.1;NP_001177403.2;NP_031854.1;XP_006513257.1;XP_006513258.1;XP_030100726.1	1203520	.	822	820	972	819	890	693
13162	NM_010020,XM_006517083,XM_006517084,XM_017315377	Slc6a3	solute carrier family 6 (neurotransmitter transporter, dopamine), member 3	protein_coding	NP_034150.1;XP_006517146.1;XP_006517147.1;XP_017170866.1	94862	.	11	17	11	5	16	13
13163	NM_001199733,NM_001355704,NM_007829,NR_149750,XM_006523581,XM_006523582	Daxx	Fas death domain-associated protein	protein_coding	NP_001186662.1;NP_001342633.1;NP_031855.3;XP_006523644.1;XP_006523645.1	1197015	.	838	934	917	964	922	825
13164	NM_001277863,NM_010021,XM_006523583	Dazl	deleted in azoospermia-like	protein_coding	NP_001264792.1;NP_034151.3;XP_006523646.1	1342328	.	124	78	97	101	111	95
13166	NM_138942	Dbh	dopamine beta hydroxylase	protein_coding	NP_620392.2	94864	.	35	64	35	38	20	33
13167	NM_001037999,NM_007830	Dbi	diazepam binding inhibitor	protein_coding	NP_001033088.1;NP_031856.1	94865	.	4836	8137	4700	5502	4886	6246
13168	NM_021294	Dbil5	diazepam binding inhibitor-like 5	protein_coding	NP_067269.1	108039	.	13	19	10	15	9	6
13169	NM_001146308,NM_001146309,NM_013810	Dbnl	drebrin-like	protein_coding	NP_001139780.1;NP_001139781.1;NP_038838.1	700006	.	2384	2770	2785	2756	2664	2579
13170	NM_016974,XM_006540596,XM_006540597	Dbp	D site albumin promoter binding protein	protein_coding	NP_058670.2;XP_006540659.1;XP_006540660.1	94866	.	1317	1700	1454	1439	1449	1595
13171	NM_001357344,NM_010022,XM_006500977	Dbt	dihydrolipoamide branched chain transacylase E2	protein_coding	NP_001344273.1;NP_034152.2;XP_006501040.1	105386	.	847	975	923	904	932	985
13172	NM_001005232	Dbx1	developing brain homeobox 1	protein_coding	NP_001005232.1	94867	.	0	0	0	0	0	0
13175	NM_001111051,NM_001111052,NM_001111053,NM_001195538,NM_001195539,NM_001195540,NM_001357466,NM_001357468,NM_001357469,NM_001357475,NM_001357476,NM_019978,XM_006500981,XM_006500982,XM_006500983,XM_011240007,XM_017319447,XM_030252411,XM_030252412,XR_003954278,XR_003954279	Dclk1	doublecortin-like kinase 1	protein_coding	NP_001104521.1;NP_001104522.1;NP_001104523.1;NP_001182467.1;NP_001182468.1;NP_001182469.1;NP_001344395.1;NP_001344397.1;NP_001344398.1;NP_001344404.1;NP_001344405.1;NP_064362.1;XP_006501044.1;XP_006501045.1;XP_006501046.1;XP_011238309.1;XP_017174936.1;XP_030108271.1;XP_030108272.1	1330861	.	22675	20499	24197	22451	21696	19253
13176	NM_007831,XM_006525588	Dcc	deleted in colorectal carcinoma	protein_coding	NP_031857.2;XP_006525651.1	94869	.	2119	1799	2053	1964	1415	1422
13177	NM_010023	Eci1	enoyl-Coenzyme A delta isomerase 1	protein_coding	NP_034153.2	94871	.	501	664	475	553	511	568
13178	NM_007832	Dck	deoxycytidine kinase	protein_coding	NP_031858.1	102726	.	960	871	894	909	886	807
13179	NM_001190451,NM_007833	Dcn	decorin	protein_coding	NP_001177380.1;NP_031859.1	94872	.	348	398	287	296	305	720
13180	NM_025273	Pcbd1	pterin 4 alpha carbinolamine dehydratase/dimerization cofactor of hepatocyte nuclear factor 1 alpha (TCF1) 1	protein_coding	NP_079549.1	94873	.	132	166	151	139	192	136
13184	NM_019910,XM_017317222	Dcpp1	demilune cell and parotid protein 1	protein_coding	NP_064294.2;XP_017172711.1	105949	.	0	0	0	0	0	0
13185	NM_007834	Vps26c	VPS26 endosomal protein sorting factor C	protein_coding	NP_031860.1	1206040	.	1082	1312	1269	1241	1202	1087
13190	NM_010024,XM_006518510	Dct	dopachrome tautomerase	protein_coding	NP_034154.2;XP_006518573.1	102563	.	24	20	17	14	12	31
13191	NM_001198866,NM_001198867,NM_001347310,NM_007835,XM_006505485,XM_006505486,XM_006505487,XM_006505488,XM_006505489,XM_006505490,XM_006505491,XM_006505492,XM_006505493,XM_006505494,XM_006505495,XM_006505496,XM_017321379,XM_030255135,XM_030255136,XM_030255137	Dctn1	dynactin 1	protein_coding	NP_001185795.1;NP_001185796.1;NP_001334239.1;NP_031861.2;XP_006505548.1;XP_006505549.1;XP_006505550.1;XP_006505551.1;XP_006505552.1;XP_006505553.1;XP_006505554.1;XP_006505555.1;XP_006505556.1;XP_006505557.1;XP_006505558.1;XP_006505559.1;XP_017176868.1;XP_030110995.1;XP_030110996.1;XP_030110997.1	107745	.	17069	16923	19466	17684	16944	13404
13193	NM_001110222,NM_001110223,NM_001110224,NM_010025,XM_006528698,XM_030251212,XM_030251213,XM_030251214	Dcx	doublecortin	protein_coding	NP_001103692.1;NP_001103693.1;NP_001103694.1;NP_034155.2;XP_006528761.1;XP_030107072.1;XP_030107073.1;XP_030107074.1	1277171	.	388	454	415	426	371	343
13194	NM_015735,XM_006526639	Ddb1	damage specific DNA binding protein 1	protein_coding	NP_056550.1;XP_006526702.1	1202384	.	11391	11651	11612	11258	10928	10550
13195	NM_001190448,NM_016672,XM_006514487,XM_006514488,XM_006514489	Ddc	dopa decarboxylase	protein_coding	NP_001177377.1;NP_057881.1;XP_006514550.1;XP_006514551.1;XP_006514552.1	94876	.	280	479	301	302	208	389
13196	NM_001276461,NM_001276462,NM_001276463,NM_001276467,NM_010026,XM_006520392,XM_006520393,XM_006520394,XM_006520395,XM_006520396,XM_006520397,XM_006520398,XM_006520399,XM_006520400,XM_006520401,XM_006520402,XM_006520403,XM_011245448,XM_030248315,XM_030248316,XM_030248317	Asap1	ArfGAP with SH3 domain, ankyrin repeat and PH domain1	protein_coding	NP_001263390.1;NP_001263391.1;NP_001263392.1;NP_001263396.1;NP_034156.2;XP_006520455.1;XP_006520456.1;XP_006520457.1;XP_006520458.1;XP_006520459.1;XP_006520460.1;XP_006520461.1;XP_006520462.1;XP_006520463.1;XP_006520464.1;XP_006520465.1;XP_006520466.1;XP_011243750.1;XP_030104175.1;XP_030104176.1;XP_030104177.1	1342335	.	3785	2885	4105	3709	3755	3358
13197	NM_007836	Gadd45a	growth arrest and DNA-damage-inducible 45 alpha	protein_coding	NP_031862.1	107799	.	113	170	145	107	120	87
13198	NM_001290183,NM_007837,XM_006513197,XM_030244867	Ddit3	DNA-damage inducible transcript 3	protein_coding	NP_001277112.1;NP_031863.3;XP_006513260.1;XP_030100727.1	109247	.	545	684	606	566	639	495
13199	NM_001013741	Ddn	dendrin	protein_coding	NP_001013763.1	108101	.	82853	63821	109407	87043	91243	77496
13200	NM_007838	Ddost	dolichyl-di-phosphooligosaccharide-protein glycotransferase	protein_coding	NP_031864.2	1194508	.	3439	4167	3907	3969	3717	3315
13202	NM_010027	Ddt	D-dopachrome tautomerase	protein_coding	NP_034157.1	1298381	.	675	848	765	792	745	554
13204	NM_001042620,NM_007839,NR_104311	Dhx15	DEAH (Asp-Glu-Ala-His) box polypeptide 15	protein_coding	NP_001036085.1;NP_031865.2	1099786	.	3419	3624	3501	3564	3534	3387
13205	NM_010028,XM_006527566	Ddx3x	DEAD box helicase 3, X-linked	protein_coding	NP_034158.1;XP_006527629.1	103064	.	11740	12064	10964	11198	10096	10675
13206	NM_001145885,NM_010029,XM_006517524,XM_011244618,XM_011244619,XM_011244621,XM_011244622	Ddx4	DEAD box helicase 4	protein_coding	NP_001139357.1;NP_034159.1;XP_006517587.1;XP_011242920.1;XP_011242921.1;XP_011242923.1;XP_011242924.1	102670	.	57	55	70	123	97	85
13207	NM_001355676,NM_001355677,NM_007840	Ddx5	DEAD box helicase 5	protein_coding	NP_001342605.1;NP_001342606.1;NP_031866.2	105037	.	29655	29947	29354	29116	28053	27765
13209	NM_001110826,NM_001357702,NM_001357703,NM_007841,NM_181324,XM_011242391,XM_030244042	Ddx6	DEAD (Asp-Glu-Ala-Asp) box polypeptide 6	protein_coding	NP_001104296.1;NP_001344631.1;NP_001344632.1;NP_031867.1;NP_851841.2;XP_011240693.1;XP_030099902.1	104976	.	8180	8299	8225	8195	7403	7454
13211	NM_007842,XM_011247918,XM_030246403	Dhx9	DEAH (Asp-Glu-Ala-His) box polypeptide 9	protein_coding	NP_031868.2;XP_011246220.1;XP_030102263.1	108177	.	6786	7245	7171	6845	6648	6364
13214	NM_007843	Defb1	defensin beta 1	protein_coding	NP_031869.1	1096878	.	0	0	0	0	0	4
13215	NM_010030	Defb2	defensin beta 2	protein_coding	NP_034160.1	1338754	.	0	0	0	0	0	0
13218	NM_007844	Defa29	defensin, alpha, 29	protein_coding	NP_031870.2	94881	.	0	0	0	0	0	0
13226	NM_007848	Defa31	defensin, alpha, 31	protein_coding	NP_031874.2	102509	.	0	0	0	0	0	0
13236	NM_007849	Defa25	defensin, alpha, 25	protein_coding	NP_031875.1	3630385	.	0	0	0	0	0	0
13237	NM_007850	Defa3	defensin, alpha, 3	protein_coding	NP_031876.1	94883	.	0	0	0	0	0	0
13239	NM_007851	Defa5	defensin, alpha, 5	protein_coding	NP_031877.2	99583	.	0	0	0	0	0	0
13244	NM_001360783,NM_007853,XM_030246432	Degs1	delta(4)-desaturase, sphingolipid 1	protein_coding	NP_001347712.1;NP_031879.1;XP_030102292.1	1097711	.	4257	5251	3928	4074	3577	4021
13340	NM_007854,XM_030250738,XM_030250739,XR_003952750	Slc29a2	solute carrier family 29 (nucleoside transporters), member 2	protein_coding	NP_031880.2;XP_030106598.1;XP_030106599.1	1345278	.	410	412	478	428	491	372
13345	NM_007855	Twist2	twist basic helix-loop-helix transcription factor 2	protein_coding	NP_031881.1	104685	.	41	21	36	39	28	17
13346	NM_010043	Des	desmin	protein_coding	NP_034173.1	94885	.	34	43	57	67	38	44
13347	NM_001025296,NM_010044,NR_104263	Dffa	DNA fragmentation factor, alpha subunit	protein_coding	NP_001020467.1;NP_034174.2	1196227	.	1179	1155	1233	1198	1207	943
13349	NM_010045	Ackr1	atypical chemokine receptor 1 (Duffy blood group)	protein_coding	NP_034175.2	1097689	.	51	72	32	92	24	34
13350	NM_010046,XM_006520405,XM_017316426,XR_383978	Dgat1	diacylglycerol O-acyltransferase 1	protein_coding	NP_034176.1;XP_006520468.1;XP_017171915.1	1333825	.	306	349	309	269	287	267
13353	NM_001289813,NM_001289814,NM_010047,NR_110380,XM_030248957,XR_003951750	Dgcr6	DiGeorge syndrome critical region gene 6	protein_coding	NP_001276742.1;NP_001276743.1;NP_034177.1;XP_030104817.1	1202877	.	1344	1647	1418	1545	1491	1334
13356	NM_001109750,NM_010048	Dgcr2	DiGeorge syndrome critical region gene 2	protein_coding	NP_001103220.1;NP_034178.2	892866	.	5600	5969	6447	6142	6101	5191
13358	NM_153150	Slc25a1	solute carrier family 25 (mitochondrial carrier, citrate transporter), member 1	protein_coding	NP_694790.1	1345283	.	938	1153	1211	1192	1137	953
13360	NM_001382498,NM_001382499,NM_001382500,NM_001382501,NM_001382502,NM_001382503,NM_007856,XM_006508476,XM_006508478,XM_006508480,XM_011241979,XM_030242075,XM_030242076	Dhcr7	7-dehydrocholesterol reductase	protein_coding	NP_001369427.1;NP_001369428.1;NP_001369429.1;NP_001369430.1;NP_001369431.1;NP_001369432.1;NP_031882.1;XP_006508539.2;XP_006508541.1;XP_006508543.1;XP_011240281.1;XP_030097935.1;XP_030097936.1	1298378	.	1499	1801	1626	1725	1683	1215
13361	NM_010049	Dhfr	dihydrofolate reductase	protein_coding	NP_034179.1	94890	.	178	276	186	179	175	172
13363	NM_007857,XM_006520406,XM_017316427,XR_875235	Dhh	desert hedgehog	protein_coding	NP_031883.1;XP_006520469.1;XP_017171916.1	94891	.	9	5	7	4	7	2
13367	NM_001305980,NM_001305981,NM_007858,XM_030250316	Diaph1	diaphanous related formin 1	protein_coding	NP_001292909.1;NP_001292910.1;NP_031884.1;XP_030106176.1	1194490	.	3208	3107	3544	3547	3269	3075
13368	NM_007859,XM_006538517,XM_011250183,XM_011250184,XM_030253183	Dffb	DNA fragmentation factor, beta subunit	protein_coding	NP_031885.3;XP_006538580.1;XP_011248485.1;XP_011248486.1;XP_030109043.1	1196287	.	76	82	63	76	90	56
13370	NM_007860	Dio1	deiodinase, iodothyronine, type I	protein_coding	NP_031886.3	94896	.	0	0	0	0	0	0
13371	NM_010050	Dio2	deiodinase, iodothyronine, type II	protein_coding	NP_034180.2	1338833	.	2853	3462	3352	3667	3358	4034
13380	NM_010051	Dkk1	dickkopf WNT signaling pathway inhibitor 1	protein_coding	NP_034181.2	1329040	.	0	0	0	0	0	0
13382	NM_007861	Dld	dihydrolipoamide dehydrogenase	protein_coding	NP_031887.2	107450	.	4967	5450	4998	5004	5259	4973
13383	NM_001252433,NM_001252434,NM_001252435,NM_001252436,NM_001357281,NM_001357282,NM_007862,NR_045516,XM_006521761,XM_006521762,XM_006521763,XM_006521764,XM_006521765,XM_006521766,XM_006521767,XM_006521768,XM_006521769,XM_006521770,XM_006521771,XM_006521772,XM_006521773,XM_017316865,XM_017316867,XM_017316869,XM_017316872,XM_030248959,XM_030248960,XM_030248961,XM_030248962,XR_001781789,XR_003951751,XR…	Dlg1	discs large MAGUK scaffold protein 1	protein_coding	NP_001239362.1;NP_001239363.1;NP_001239364.1;NP_001239365.1;NP_001344210.1;NP_001344211.1;NP_031888.2;XP_006521824.1;XP_006521825.1;XP_006521826.1;XP_006521827.1;XP_006521828.1;XP_006521829.1;XP_006521830.1;XP_006521831.1;XP_006521832.1;XP_006521833.1;XP_006521834.1;XP_006521835.1;XP_006521836.1;XP_017172354.1;XP_017172356.1;XP_017172358.1;XP_017172361.1;XP_030104819.1;XP_030104820.1;XP_030104821…	107231	.	3663	4589	3836	3836	3526	4071
13384	NM_007863,XM_006532138,XM_006532140,XM_030245518	Mpp3	membrane protein, palmitoylated 3 (MAGUK p55 subfamily member 3)	protein_coding	NP_031889.2;XP_006532201.1;XP_006532203.1;XP_030101378.1	1328354	.	2956	3348	2841	2854	2793	1991
13385	NM_001109752,NM_001370671,NM_001370672,NM_001370674,NM_001370675,NM_007864,XM_006532144,XM_006532147,XM_006532148,XM_006532150,XM_017314248,XR_001779872	Dlg4	discs large MAGUK scaffold protein 4	protein_coding	NP_001103222.1;NP_001357600.1;NP_001357601.1;NP_001357603.1;NP_001357604.1;NP_031890.1;XP_006532207.1;XP_006532210.3;XP_006532211.1;XP_006532213.1;XP_017169737.1	1277959	.	34343	29553	38490	36253	34691	28401
13386	NM_001190703,NM_001190704,NM_001190705,NM_010052,NR_033813,XM_006515457,XM_011243992,XM_030246536	Dlk1	delta like non-canonical Notch ligand 1	protein_coding	NP_001177632.1;NP_001177633.1;NP_001177634.1;NP_034182.2;XP_006515520.1;XP_011242294.1;XP_030102396.1	94900	.	101	21	20	12	132	185
13388	NM_001379042,NM_007865,XM_011246267	Dll1	delta like canonical Notch ligand 1	protein_coding	NP_001365971.1;NP_031891.2;XP_011244569.1	104659	.	137	180	166	201	231	184
13389	NM_007866	Dll3	delta like canonical Notch ligand 3	protein_coding	NP_031892.2	1096877	.	39	57	51	56	47	51
13390	NM_010053,XM_006498672,XM_017315305,XM_030247131,XM_030247132	Dlx1	distal-less homeobox 1	protein_coding	NP_034183.1;XP_006498735.1;XP_017170794.1;XP_030102991.1;XP_030102992.1	94901	.	338	311	403	378	458	427
13392	NM_010054	Dlx2	distal-less homeobox 2	protein_coding	NP_034184.1	94902	.	124	127	120	102	152	105
13393	NM_010055	Dlx3	distal-less homeobox 3	protein_coding	NP_034185.1	94903	.	0	4	0	0	4	4
13394	NM_007867,XM_030245519	Dlx4	distal-less homeobox 4	protein_coding	NP_031893.3;XP_030101379.1	94904	.	7	17	3	7	27	14
13395	NM_010056,NM_198854,XM_006504980,XM_006504981	Dlx5	distal-less homeobox 5	protein_coding	NP_034186.2;NP_942151.1;XP_006505043.1;XP_006505044.1	101926	.	131	104	144	141	128	116
13396	NM_010057	Dlx6	distal-less homeobox 6	protein_coding	NP_034187.1	101927	.	63	48	62	57	100	70
13397	NR_002839	Dlx6os2	distal-less homeobox 6, opposite strand 2	lncRNA	.	1195963	.	0	0	0	0	0	0
13400	NM_001190490,NM_001190491,NM_001374651,NM_001379257,NM_032418,NR_126095,XM_006539516,XM_006539517,XM_006539519,XM_006539520,XM_006539521,XM_006539522,XR_391041	Dmpk	dystrophia myotonica-protein kinase	protein_coding	NP_001177419.1;NP_001177420.1;NP_001361580.1;NP_001366186.1;NP_115794.1;XP_006539579.1;XP_006539580.1;XP_006539582.1;XP_006539583.1;XP_006539584.1;XP_006539585.1	94906	.	178	125	131	119	114	108
13401	NM_001374607,NM_010058,XM_006539524	Dmwd	dystrophia myotonica-containing WD repeat motif	protein_coding	NP_001361536.1;NP_034188.2;XP_006539587.1	94907	.	4674	4784	5143	5208	4765	4082
13404	NM_001278226,NM_010059,NR_103477,XM_006520407,XM_006520408,XM_006520409	Dmc1	DNA meiotic recombinase 1	protein_coding	NP_001265155.1;NP_034189.1;XP_006520470.1;XP_006520471.1;XP_006520472.1	105393	.	3	6	4	6	2	4
13405	NM_001314034,NM_001314035,NM_001314036,NM_001314037,NM_001314038,NM_007868,XM_006527767,XM_006527768,XM_006527773,XM_017318373,XM_017318374,XM_017318375,XM_017318376,XM_017318377,XM_017318378,XM_017318379,XM_030251215	Dmd	dystrophin, muscular dystrophy	protein_coding	NP_001300963.1;NP_001300964.1;NP_001300965.1;NP_001300966.1;NP_001300967.1;NP_031894.1;XP_006527830.1;XP_006527831.1;XP_006527836.1;XP_017173862.1;XP_017173863.1;XP_017173864.1;XP_017173865.1;XP_017173866.1;XP_017173867.1;XP_017173868.1;XP_030107075.1	94909	.	2769	2681	2787	2778	2484	2764
13406	NM_001359013,NM_016779	Dmp1	dentin matrix protein 1	protein_coding	NP_001345942.1;NP_058059.2	94910	.	202	193	201	239	208	197
13409	NM_028953,XM_006526640	Tmc1	transmembrane channel-like gene family 1	protein_coding	NP_083229.1;XP_006526703.1	2151016	.	0	7	0	0	0	0
13411	NM_010060,XM_006515463,XM_006515464,XM_006515466,XM_006515467,XM_006515468,XM_017314946,XM_017314947,XM_017314948,XM_017314949	Dnah11	dynein, axonemal, heavy chain 11	protein_coding	NP_034190.3;XP_006515526.1;XP_006515527.1;XP_006515529.1;XP_006515530.1;XP_006515531.1;XP_017170435.1;XP_017170436.1;XP_017170437.1;XP_017170438.1	1100864	.	140	193	83	98	61	122
13417	NM_013811,XM_006523588,XM_006523591,XM_006523592,XM_030249467	Dnah8	dynein, axonemal, heavy chain 8	protein_coding	NP_038839.2;XP_006523651.1;XP_006523654.1;XP_006523655.1;XP_030105327.1	107714	.	51	40	28	46	37	38
13418	NM_001190817,NM_007869,XM_011238947,XR_865923	Dnajc1	DnaJ heat shock protein family (Hsp40) member C1	protein_coding	NP_001177746.1;NP_031895.1;XP_011237249.1	103268	.	921	993	1075	1059	1029	1022
13419	NM_001357143,NM_010061,XM_006521775,XM_006521776	Dnase1	deoxyribonuclease I	protein_coding	NP_001344072.1;NP_034191.3;XP_006521838.1;XP_006521839.1	103157	.	0	0	0	0	0	0
13421	NM_007870,XM_006517921	Dnase1l3	deoxyribonuclease 1-like 3	protein_coding	NP_031896.3;XP_006517984.1	1314633	.	11	3	4	6	0	5
13423	NM_001368295,NM_001368296,NM_010062	Dnase2a	deoxyribonuclease II alpha	protein_coding	NP_001355224.1;NP_001355225.1;NP_034192.1	1329019	.	122	226	144	198	130	215
13424	NM_030238	Dync1h1	dynein cytoplasmic 1 heavy chain 1	protein_coding	NP_084514.2	103147	.	18974	17708	23913	17292	17322	15764
13426	NM_001191023,NM_001191025,NM_001191026,NM_001191027,NM_010063,XM_006504982,XM_017321380,XM_030255138,XM_030255139	Dync1i1	dynein cytoplasmic 1 intermediate chain 1	protein_coding	NP_001177952.1;NP_001177954.1;NP_001177955.1;NP_001177956.1;NP_034193.2;XP_006505045.1;XP_017176869.1;XP_030110998.1;XP_030110999.1	107743	.	6240	6009	6374	6615	6364	4610
13427	NM_001198872,NM_001198873,NM_001198874,NM_001198875,NM_001198876,NM_001198877,NM_001198878,NM_001347173,NM_010064,XM_006498676,XM_006498677,XM_006498678,XM_006498679,XM_006498680,XM_017315319,XM_017315324,XM_017315326,XM_030247151,XM_030247156,XM_030247159,XM_030247161,XM_030247162	Dync1i2	dynein cytoplasmic 1 intermediate chain 2	protein_coding	NP_001185801.1;NP_001185802.1;NP_001185803.1;NP_001185804.1;NP_001185805.1;NP_001185806.1;NP_001185807.1;NP_001334102.1;NP_034194.1;XP_006498739.1;XP_006498740.1;XP_006498741.1;XP_006498742.1;XP_006498743.1;XP_017170808.1;XP_017170813.1;XP_017170815.1;XP_030103011.1;XP_030103016.1;XP_030103019.1;XP_030103021.1;XP_030103022.1	107750	.	3841	4129	3804	3835	3677	3971
13429	NM_001301737,NM_001368679,NM_010065,NR_125959,XM_006497649,XM_006497650,XM_006497652,XM_006497653,XM_006497654,XM_006497655,XM_006497658,XM_006497659,XM_006497660,XM_006497661,XM_006497662,XM_017315328,XR_001780675,XR_001780678,XR_003950433,XR_374055,XR_374057,XR_374058	Dnm1	dynamin 1	protein_coding	NP_001288666.1;NP_001355608.1;NP_034195.2;XP_006497712.2;XP_006497713.2;XP_006497715.2;XP_006497716.2;XP_006497717.2;XP_006497718.2;XP_006497721.2;XP_006497722.2;XP_006497723.2;XP_006497724.2;XP_006497725.1;XP_017170817.1	107384	.	57829	52825	61079	59225	56477	37345
13430	NM_001039520,NM_001253893,NM_001253894,NM_001357718,NM_001357719,NM_001357721,NM_007871,XM_006509973,XM_006509974,XM_006509975,XM_006509976,XM_006509978,XM_006509979,XM_006509980,XM_006509981,XM_006509983,XM_006509984,XM_006509985,XM_017313125,XM_017313126,XM_017313127,XM_017313128,XM_030244043,XM_030244044,XM_030244045,XM_030244046,XM_030244047,XR_001778793,XR_003947776	Dnm2	dynamin 2	protein_coding	NP_001034609.1;NP_001240822.1;NP_001240823.1;NP_001344647.1;NP_001344648.1;NP_001344650.1;NP_031897.2;XP_006510036.1;XP_006510037.1;XP_006510038.1;XP_006510039.1;XP_006510041.1;XP_006510042.1;XP_006510043.1;XP_006510044.1;XP_006510046.1;XP_006510047.1;XP_006510048.1;XP_017168614.1;XP_017168615.1;XP_017168616.1;XP_017168617.1;XP_030099903.1;XP_030099904.1;XP_030099905.1;XP_030099906.1;XP_030099907…	109547	.	1901	2595	2147	2014	1677	2113
13433	NM_001199431,NM_001199432,NM_001199433,NM_001314011,NM_010066,XM_006509988,XM_011242393	Dnmt1	DNA methyltransferase (cytosine-5) 1	protein_coding	NP_001186360.2;NP_001186361.1;NP_001186362.1;NP_001300940.1;NP_034196.5;XP_006510051.1;XP_011240695.1	94912	.	1561	1597	1760	1675	1638	1518
13434	NM_010067,XM_006497324,XM_006497325,XM_011238948,XM_030247190,XR_003950434,XR_003950435	Trdmt1	tRNA aspartic acid methyltransferase 1	protein_coding	NP_034197.3;XP_006497387.1;XP_006497388.1;XP_011237250.1;XP_030103050.1	1274787	.	191	205	168	152	128	181
13435	NM_001271753,NM_007872,NM_153743,XM_006514953,XM_006514956,XM_030246538,XM_030246539,XM_030246540,XM_030246541	Dnmt3a	DNA methyltransferase 3A	protein_coding	NP_001258682.1;NP_031898.1;NP_714965.1;XP_006515016.1;XP_006515019.1;XP_030102398.1;XP_030102399.1;XP_030102400.1;XP_030102401.1	1261827	.	1558	1898	1888	1870	1548	1583
13436	NM_001003960,NM_001003961,NM_001003963,NM_001122997,NM_001271744,NM_001271745,NM_001271746,NM_001271747,NM_010068,XM_006498682,XM_006498683,XM_006498684,XM_006498685,XM_006498686,XM_006498687,XM_006498688,XM_006498689,XM_030247208,XM_030247215,XM_030247217,XM_030247218,XR_374399	Dnmt3b	DNA methyltransferase 3B	protein_coding	NP_001003960.2;NP_001003961.2;NP_001003963.2;NP_001116469.1;NP_001258673.1;NP_001258674.1;NP_001258675.1;NP_001258676.1;NP_034198.3;XP_006498745.1;XP_006498746.1;XP_006498747.1;XP_006498748.1;XP_006498749.1;XP_006498750.1;XP_006498751.1;XP_006498752.1;XP_030103068.1;XP_030103075.1;XP_030103077.1;XP_030103078.1	1261819	.	27	28	22	16	0	16
13437	NM_001110831,NM_016878,XM_006496405,XM_006496406	Dnpep	aspartyl aminopeptidase	protein_coding	NP_001104301.1;NP_058574.3;XP_006496468.1;XP_006496469.1	1278328	.	871	963	928	892	962	841
13445	NM_013812	Cdk2ap1	CDK2 (cyclin-dependent kinase 2)-associated protein 1	protein_coding	NP_038840.2	1202069	.	1108	1410	1252	1221	1219	1224
13446	NM_001368355,NM_001368356,NM_001368357,NM_001368358,NM_010069,XM_030242078,XM_030242079,XM_030242080,XM_030242081,XM_030242082,XM_030242083	Doc2a	double C2, alpha	protein_coding	NP_001355284.1;NP_001355285.1;NP_001355286.1;NP_001355287.1;NP_034199.1;XP_030097938.1;XP_030097939.1;XP_030097940.1;XP_030097941.1;XP_030097942.1;XP_030097943.1	109446	.	355	281	383	414	354	216
13447	NM_007873	Doc2b	double C2, beta	protein_coding	NP_031899.2	1100497	.	5901	5144	7136	6815	7085	7441
13448	NM_001291799,NM_010070,XM_006505497,XM_030255140	Dok1	docking protein 1	protein_coding	NP_001278728.1;NP_034200.4;XP_006505560.1;XP_030111000.1	893587	.	76	100	93	84	72	93
13449	NM_010071,XM_011244943,XM_017315834,XM_030247633,XM_030247634,XM_030247635,XM_030247636,XM_030247637	Dok2	docking protein 2	protein_coding	NP_034201.1;XP_011243245.1;XP_017171323.1;XP_030103493.1;XP_030103494.1;XP_030103495.1;XP_030103496.1;XP_030103497.1	1332623	.	13	9	8	12	10	7
13476	NM_007874,XR_003952491	Reep5	receptor accessory protein 5	protein_coding	NP_031900.3	1270152	.	17762	19246	18239	18783	18092	15046
13478	NM_001364464,NM_007875,XM_006509991,XM_006509992,XM_006509995,XM_030244048	Dpagt1	dolichyl-phosphate (UDP-N-acetylglucosamine) acetylglucosaminephosphotransferase 1 (GlcNAc-1-P transferase)	protein_coding	NP_001351393.1;NP_031901.2;XP_006510054.1;XP_006510055.1;XP_006510058.1;XP_030099908.1	1196396	.	373	452	438	461	409	364
13479	NM_007876,XM_017312558	Dpep1	dipeptidase 1	protein_coding	NP_031902.2;XP_017168047.1	94917	.	9	10	7	12	5	4
13480	NM_001310084,NM_010072	Dpm1	dolichol-phosphate (beta-D) mannosyltransferase 1	protein_coding	NP_001297013.1;NP_034202.1	1330239	.	314	743	410	859	553	531
13481	NM_010073	Dpm2	dolichol-phosphate (beta-D) mannosyltransferase 2	protein_coding	NP_034203.1	1330238	.	977	998	1029	1049	1041	780
13482	NM_001159543,NM_010074,XM_006498691,XM_006498692,XM_011239274,XR_001780739	Dpp4	dipeptidylpeptidase 4	protein_coding	NP_001153015.1;NP_034204.1;XP_006498754.1;XP_006498755.1;XP_011237576.1	94919	.	24	32	29	26	17	25
13483	NM_001136060,NM_001198886,NM_010075,NM_207282	Dpp6	dipeptidylpeptidase 6	protein_coding	NP_001129532.1;NP_001185815.1;NP_034205.1;NP_997165.2	94921	.	18673	17407	20010	18547	17357	13634
13486	NM_026106	Dr1	down-regulator of transcription 1	protein_coding	NP_080382.2	1100515	.	2161	2051	1925	2040	2096	1904
13487	NM_021353,XM_011243812,XM_017314950	Slc26a3	solute carrier family 26, member 3	protein_coding	NP_067328.1;XP_011242114.1;XP_017170439.1	107181	.	10	20	16	22	16	25
13488	NM_001291801,NM_010076	Drd1	dopamine receptor D1	protein_coding	NP_001278730.1;NP_034206.1	99578	.	169	195	164	183	145	136
13489	NM_010077,XM_006509996	Drd2	dopamine receptor D2	protein_coding	NP_034207.2;XP_006510059.1	94924	.	56	25	72	61	69	32
13490	NM_007877,XM_006521777	Drd3	dopamine receptor D3	protein_coding	NP_031903.1;XP_006521840.1	94925	.	0	0	6	5	0	0
13491	NM_007878,XM_006536156,XM_017321972	Drd4	dopamine receptor D4	protein_coding	NP_031904.1;XP_006536219.1;XP_017177461.1	94926	.	7	11	0	8	0	6
13492	NM_013503	Drd5	dopamine receptor D5	protein_coding	NP_038531.1	94927	.	744	729	847	881	785	752
13494	NM_007879,XM_017314249	Drg1	developmentally regulated GTP binding protein 1	protein_coding	NP_031905.1;XP_017169738.1	1343297	.	2935	3215	3150	3205	3250	2720
13495	NM_021354,XM_006532153	Drg2	developmentally regulated GTP binding protein 2	protein_coding	NP_067329.1;XP_006532216.1	1342307	.	1720	2076	1872	1981	1917	1673
13496	NM_001288625,NM_001288626,NM_007880,XM_006513201,XM_006513202	Arid3a	AT rich interactive domain 3A (BRIGHT-like)	protein_coding	NP_001275554.1;NP_001275555.1;NP_031906.1;XP_006513264.1;XP_006513265.1	1328360	.	136	186	192	153	151	149
13497	NM_010078,XM_006528496,XM_011247730,XM_017318380,XM_030251216,XM_030251217,XM_030251218,XM_030251219,XM_030251220,XR_001782733,XR_003952997	Drp2	dystrophin related protein 2	protein_coding	NP_034208.2;XP_006528559.1;XP_011246032.1;XP_017173869.1;XP_030107076.1;XP_030107077.1;XP_030107078.1;XP_030107079.1;XP_030107080.1	107432	.	2533	2547	2882	2858	2761	2744
13498	NM_007881	Atn1	atrophin 1	protein_coding	NP_031907.2	104725	.	5758	5541	6633	6382	5913	5514
13505	NM_001291804,NM_013504	Dsc1	desmocollin 1	protein_coding	NP_001278733.1;NP_038532.3	109173	.	3	7	3	3	0	4
13506	NM_001317363,NM_001317365,NM_013505	Dsc2	desmocollin 2	protein_coding	NP_001304292.1;NP_001304294.1;NP_038533.1	103221	.	10	7	7	10	10	11
13507	NM_001291809,NM_007882,XM_006525593,XM_006525596	Dsc3	desmocollin 3	protein_coding	NP_001278738.1;NP_031908.3;XP_006525656.1;XP_006525659.1	1194993	.	41	82	67	37	34	58
13508	NM_031174,XM_006522886,XM_006522887,XM_030248963,XR_003951753,XR_003951754	Dscam	DS cell adhesion molecule	protein_coding	NP_112451.1;XP_006522949.1;XP_006522950.1;XP_030104823.1	1196281	.	2986	3306	3405	3088	2954	2589
13510	NM_010079,XM_006525597	Dsg1a	desmoglein 1 alpha	protein_coding	NP_034209.2;XP_006525660.1	94930	.	0	0	0	0	0	0
13511	NM_007883	Dsg2	desmoglein 2	protein_coding	NP_031909.2	1196466	.	317	406	249	224	148	208
13512	NM_030596	Dsg3	desmoglein 3	protein_coding	NP_085099.2	99499	.	0	0	0	0	0	0
13516	NM_001379456,NM_007884	Epyc	epiphycan	protein_coding	NP_001366385.1;NP_031910.1	107942	.	2	4	0	0	0	2
13518	NM_001276764,NM_010081,NM_133833,NM_134448,XM_006495666,XM_006495669,XM_006495674,XM_006495678,XM_006495679,XM_006495680,XM_006495682,XM_006495684,XM_006495685,XM_006495686,XM_006495688,XM_006495690,XM_006495691,XM_017314621,XM_017314635,XM_017314651,XM_017314665,XM_017314676,XM_017314687,XM_017314689,XM_017314706,XM_017314712,XM_017314716,XM_017314722,XM_017314741,XM_017314750,XM_017314794,XM_01…	Dst	dystonin	protein_coding	NP_001263693.1;NP_034211.2;NP_598594.2;NP_604443.2;XP_006495729.1;XP_006495732.1;XP_006495737.1;XP_006495741.1;XP_006495742.1;XP_006495743.1;XP_006495745.1;XP_006495747.1;XP_006495748.1;XP_006495749.1;XP_006495751.1;XP_006495753.1;XP_006495754.1;XP_017170110.1;XP_017170124.1;XP_017170140.1;XP_017170154.1;XP_017170165.1;XP_017170176.1;XP_017170178.1;XP_017170195.1;XP_017170201.1;XP_017170205.1;XP_…	104627	.	8403	9754	10732	8854	7748	9057
13521	NM_007885	Slc26a2	solute carrier family 26 (sulfate transporter), member 2	protein_coding	NP_031911.1	892977	.	209	284	207	186	170	156
13522	NM_001048175,NM_010082,NM_183366,NR_102399,XM_006518514,XM_017315836,XR_001781095	Adam28	a disintegrin and metallopeptidase domain 28	protein_coding	NP_001041640.1;NP_034212.1;NP_899222.1;XP_006518577.1;XP_017171325.1	105988	.	2	5	0	0	3	4
13524	NM_010084,NR_136908	Adam18	a disintegrin and metallopeptidase domain 18	protein_coding	NP_034214.2	105986	.	6	11	15	7	8	8
13525	NM_010085	Adam26a	a disintegrin and metallopeptidase domain 26A (testase 3)	protein_coding	NP_034215.2	105985	.	0	0	0	0	0	0
13526	NM_010086,XM_006509261	Adam24	a disintegrin and metallopeptidase domain 24 (testase 1)	protein_coding	NP_034216.3;XP_006509324.1	105984	.	0	0	0	0	0	0
13527	NM_001285807,NM_001285808,NM_001285810,NM_001285811,NM_001285813,NM_001285817,NM_001361215,NM_001361216,NM_001361217,NM_010087,NM_207650,XM_011246827,XM_011246830,XM_011246833,XM_011246835,XM_011246838,XM_017317811,XM_017317817,XM_030250317,XM_030250318,XM_030250319,XM_030250320,XM_030250321,XM_030250322,XM_030250323,XM_030250324,XM_030250325,XR_001782334,XR_001782335,XR_001782336,XR_001782337,XR…	Dtna	dystrobrevin alpha	protein_coding	NP_001272736.1;NP_001272737.1;NP_001272739.1;NP_001272740.1;NP_001272742.1;NP_001272746.1;NP_001348144.1;NP_001348145.1;NP_001348146.1;NP_034217.2;NP_997533.1;XP_011245129.1;XP_011245132.1;XP_011245135.1;XP_011245137.1;XP_011245140.1;XP_017173300.1;XP_017173306.1;XP_030106177.1;XP_030106178.1;XP_030106179.1;XP_030106180.1;XP_030106181.1;XP_030106182.1;XP_030106183.1;XP_030106184.1;XP_030106185.1	106039	.	6525	9458	7168	7638	5996	6748
13528	NM_001162465,NM_001355528,NM_001374710,NM_007886,NR_027869,NR_027870,NR_149729,XM_006514959,XM_006514960,XM_006514961,XM_011243813,XM_011243814,XM_017314951,XM_017314952,XM_017314953,XM_017314954,XM_017314955,XM_030246544,XM_030246545,XM_030246547,XM_030246548,XM_030246549,XM_030246550,XM_030246551,XM_030246553	Dtnb	dystrobrevin, beta	protein_coding	NP_001155937.1;NP_001342457.1;NP_001361639.1;NP_031912.2;XP_006515022.1;XP_006515023.1;XP_006515024.1;XP_011242115.1;XP_011242116.1;XP_017170440.1;XP_017170441.1;XP_017170442.1;XP_017170443.1;XP_017170444.1;XP_030102404.1;XP_030102405.1;XP_030102407.1;XP_030102408.1;XP_030102409.1;XP_030102410.1;XP_030102411.1;XP_030102413.1	1203728	.	2495	2450	2594	2562	2430	1968
13529	NM_001289919,NM_010088	Prl8a2	prolactin family 8, subfamily a, member 2	protein_coding	NP_001276848.1;NP_034218.1	894281	.	0	0	0	0	0	0
13531	NM_007887	Usp17la	ubiquitin specific peptidase 17-like A	protein_coding	NP_031913.1	107699	.	0	0	0	0	0	0
13532	NM_010089	Usp17lc	ubiquitin specific peptidase 17-like C	protein_coding	NP_034219.3	107698	.	0	0	0	0	0	0
13537	NM_010090	Dusp2	dual specificity phosphatase 2	protein_coding	NP_034220.2	101911	.	23	33	19	29	23	33
13542	NM_001356381,NM_010091,XM_006538518,XM_006538519,XM_006538520,XM_006538521,XM_006538522,XM_006538523	Dvl1	dishevelled segment polarity protein 1	protein_coding	NP_001343310.1;NP_034221.3;XP_006538581.1;XP_006538582.1;XP_006538583.1;XP_006538584.1;XP_006538585.1;XP_006538586.1	94941	.	1926	1998	2339	2231	2088	1793
13543	NM_007888	Dvl2	dishevelled segment polarity protein 2	protein_coding	NP_031914.3	106613	.	357	418	360	374	340	331
13544	NM_001347176,NM_007889,XM_006521780,XR_003951755	Dvl3	dishevelled segment polarity protein 3	protein_coding	NP_001334105.1;NP_031915.2;XP_006521843.1	108100	.	1930	2201	2286	2130	2021	2034
13548	NM_001113389,NM_001347731,NM_007890,XM_011246094,XM_011246095,XM_011246096,XM_011246098,XM_011246099	Dyrk1a	dual-specificity tyrosine-(Y)-phosphorylation regulated kinase 1a	protein_coding	NP_001106860.1;NP_001334660.1;NP_031916.1;XP_011244396.1;XP_011244397.1;XP_011244398.1;XP_011244400.1;XP_011244401.1	1330299	.	3859	4052	3885	3805	3737	3475
13549	NM_001037957,NM_001271370,NM_010092,XM_006539526,XM_006539527,XM_030242084,XR_003946383,XR_003946384,XR_003946385	Dyrk1b	dual-specificity tyrosine-(Y)-phosphorylation regulated kinase 1b	protein_coding	NP_001033046.1;NP_001258299.1;NP_034222.1;XP_006539589.1;XP_006539590.1;XP_030097944.1	1330302	.	1720	1853	2041	1803	1836	1690
13555	NM_001291105,NM_007891	E2f1	E2F transcription factor 1	protein_coding	NP_001278034.1;NP_031917.1	101941	.	238	207	280	284	259	163
13557	NM_001289920,NM_001359994,NM_010093,XM_011244275,XM_011244276,XM_030247136	E2f3	E2F transcription factor 3	protein_coding	NP_001276849.1;NP_001346923.1;NP_034223.1;XP_011242577.1;XP_011242578.1;XP_030102996.1	1096340	.	1983	1867	2143	1992	1913	1417
13559	NM_007892,XM_006530051,XR_001783649	E2f5	E2F transcription factor 5	protein_coding	NP_031918.2;XP_006530114.1	105091	.	255	346	265	311	273	336
13560	NM_001301784,NM_001355708,NM_007893,NR_125990,XM_011246268,XM_017317223,XM_017317224,XR_003952082,XR_003952083	E4f1	E4F transcription factor 1	protein_coding	NP_001288713.1;NP_001342637.1;NP_031919.2;XP_011244570.1;XP_017172712.1;XP_017172713.1	109530	.	324	397	427	362	368	319
13586	NM_007894	Ear1	eosinophil-associated, ribonuclease A family, member 1	protein_coding	NP_031920.1	108021	.	0	0	2	0	0	0
13587	NM_007895	Ear2	eosinophil-associated, ribonuclease A family, member 2	protein_coding	NP_031921.1	108020	.	0	0	0	0	0	0
13589	NM_007896	Mapre1	microtubule-associated protein, RP/EB family, member 1	protein_coding	NP_031922.1	891995	.	3541	4449	3858	4119	3624	4044
13590	NM_010094	Lefty1	left right determination factor 1	protein_coding	NP_034224.1	107405	.	436	286	603	499	552	600
13591	NM_001290709,NM_001290710,NM_001290711,NM_001362569,NM_001362571,NM_001362574,NM_001362575,NM_001362576,NM_001362577,NM_001362578,NM_001362579,NM_007897,XM_017314250,XM_030245520,XM_030245521,XM_030245522	Ebf1	early B cell factor 1	protein_coding	NP_001277638.1;NP_001277639.1;NP_001277640.1;NP_001349498.1;NP_001349500.1;NP_001349503.1;NP_001349504.1;NP_001349505.1;NP_001349506.1;NP_001349507.1;NP_001349508.1;NP_031923.1;XP_017169739.1;XP_030101380.1;XP_030101381.1;XP_030101382.1	95275	.	85	124	84	91	76	96
13592	NM_001276387,NM_001360202,NM_010095	Ebf2	early B cell factor 2	protein_coding	NP_001263316.1;NP_001347131.1;NP_034225.1	894332	.	6	11	0	5	6	2
13593	NM_001113414,NM_001113415,NM_010096,XM_006507331,XM_006507332,XM_006507333,XM_006507334,XM_006507335,XM_006507336,XM_006507337,XM_011241672,XM_030242085,XM_030242086,XM_030242087,XM_030242088,XM_030242089,XM_030242090,XM_030242091,XM_030242092,XM_030242093,XM_030242094,XM_030242095	Ebf3	early B cell factor 3	protein_coding	NP_001106885.1;NP_001106886.1;NP_034226.1;XP_006507394.1;XP_006507395.1;XP_006507396.1;XP_006507397.1;XP_006507398.1;XP_006507399.1;XP_006507400.1;XP_011239974.1;XP_030097945.1;XP_030097946.1;XP_030097947.1;XP_030097948.1;XP_030097949.1;XP_030097950.1;XP_030097951.1;XP_030097952.1;XP_030097953.1;XP_030097954.1;XP_030097955.1	894289	.	29	47	51	49	26	34
13595	NM_007898	Ebp	phenylalkylamine Ca2+ antagonist (emopamil) binding protein	protein_coding	NP_031924.1	107822	.	514	649	565	585	593	567
13599	NM_001277925,NM_021306,XM_017314898,XM_017314902,XM_017314903,XR_001780275,XR_001780293	Ecel1	endothelin converting enzyme-like 1	protein_coding	NP_001264854.1;NP_067281.2;XP_017170387.1;XP_017170391.1;XP_017170392.1	1343461	.	55	75	40	63	80	73
13601	NM_001252653,NM_001355070,NM_007899,XM_006500984,XM_011240008,XM_011240009,XM_017319449,XM_017319450,XM_030252413	Ecm1	extracellular matrix protein 1	protein_coding	NP_001239582.1;NP_001341999.1;NP_031925.2;XP_006501047.1;XP_011238310.1;XP_011238311.1;XP_017174938.1;XP_017174939.1;XP_030108273.1	103060	.	87	99	141	115	98	124
13602	NM_001359014,NM_001359016,NM_010097	Sparcl1	SPARC-like 1	protein_coding	NP_001345943.1;NP_001345945.1;NP_034227.3	108110	.	62932	87260	69435	77215	67093	78867
13603	NM_010098,XM_006496642	Opn3	opsin 3	protein_coding	NP_034228.1;XP_006496705.1	1338022	.	18	29	29	12	18	21
13605	NM_001177625,NM_001177626,NM_007900,XM_006535385,XM_006535386	Ect2	ect2 oncogene	protein_coding	NP_001171096.1;NP_001171097.1;NP_031926.2;XP_006535448.1;XP_006535449.1	95281	.	18	21	21	18	23	20
13607	NM_001177937,NM_001177938,NM_001177939,NM_001177940,NM_001177941,NM_001177942,NM_001177943,NM_001177944,NM_010099	Eda	ectodysplasin-A	protein_coding	NP_001171408.1;NP_001171409.1;NP_001171410.1;NP_001171411.1;NP_001171412.1;NP_001171413.1;NP_001171414.1;NP_001171415.1;NP_034229.1	1195272	.	279	338	273	310	326	295
13608	NM_010100,XM_006513204,XM_006513205,XM_006513206,XM_030244869	Edar	ectodysplasin-A receptor	protein_coding	NP_034230.1;XP_006513267.1;XP_006513268.1;XP_006513269.1;XP_030100729.1	1343498	.	23	11	10	0	4	13
13609	NM_007901	S1pr1	sphingosine-1-phosphate receptor 1	protein_coding	NP_031927.2	1096355	.	5850	8155	6562	7474	6178	7574
13610	NM_010101	S1pr3	sphingosine-1-phosphate receptor 3	protein_coding	NP_034231.1	1339365	.	316	626	337	418	359	360
13611	NM_010102	S1pr4	sphingosine-1-phosphate receptor 4	protein_coding	NP_034232.1	1333809	.	11	6	14	28	5	10
13612	NM_001037987,NM_010103	Edil3	EGF-like repeats and discoidin I-like domains 3	protein_coding	NP_001033076.1;NP_034233.1	1329025	.	5606	6873	5516	5438	4364	5042
13614	NM_010104	Edn1	endothelin 1	protein_coding	NP_034234.1	95283	.	30	43	29	38	51	64
13615	NM_007902	Edn2	endothelin 2	protein_coding	NP_031928.2	95284	.	2	0	0	0	0	0
13616	NM_007903	Edn3	endothelin 3	protein_coding	NP_031929.1	95285	.	206	239	174	185	164	285
13617	NM_010332	Ednra	endothelin receptor type A	protein_coding	NP_034462.1	105923	.	168	300	234	232	196	247
13618	NM_001136061,NM_001276296,NM_007904,XM_006518515	Ednrb	endothelin receptor type B	protein_coding	NP_001129533.1;NP_001263225.1;NP_031930.1;XP_006518578.1	102720	.	2095	3851	2107	2562	2102	2945
13619	NM_001042623,NM_001271579,NM_001355215,NM_007905,NR_073364,XM_006505498,XM_006505499,XM_006505500,XM_017321382,XM_030255141,XM_030255142	Phc1	polyhomeotic 1	protein_coding	NP_001036088.1;NP_001258508.1;NP_001342144.1;NP_031931.2;XP_006505561.1;XP_006505562.1;XP_006505563.1;XP_017176871.1;XP_030111001.1;XP_030111002.1	103248	.	1617	1859	1845	1742	1532	1514
13626	NM_021876	Eed	embryonic ectoderm development	protein_coding	NP_068676.1	95286	.	410	480	444	453	397	434
13627	NM_010106	Eef1a1	eukaryotic translation elongation factor 1 alpha 1	protein_coding	NP_034236.2	1096881	.	99991	123153	109381	116176	105809	109615
13628	NM_007906	Eef1a2	eukaryotic translation elongation factor 1 alpha 2	protein_coding	NP_031932.1	1096317	.	39533	37897	42978	41018	41517	32387
13629	NM_007907	Eef2	eukaryotic translation elongation factor 2	protein_coding	NP_031933.1	95288	.	45797	47924	50260	48886	45842	41797
13631	NM_001267710,NM_001267711,NM_007908,XM_006507342,XM_006507343,XM_006507344,XM_006507345,XM_006507346,XR_003946386	Eef2k	eukaryotic elongation factor-2 kinase	protein_coding	NP_001254639.1;NP_001254640.1;NP_031934.1;XP_006507405.1;XP_006507406.1;XP_006507407.1;XP_006507408.1;XP_006507409.1	1195261	.	1605	1878	1661	1628	1460	1311
13636	NM_001162425,NM_010107	Efna1	ephrin A1	protein_coding	NP_001155897.1;NP_034237.3	103236	.	129	237	155	216	144	193
13637	NM_007909	Efna2	ephrin A2	protein_coding	NP_031935.3	102707	.	194	284	289	270	243	162
13638	NM_001377116,NM_001377117,NM_001377118,NM_001377119,NM_001377120,NM_001377121,NM_010108	Efna3	ephrin A3	protein_coding	NP_001364045.1;NP_001364046.1;NP_001364047.1;NP_001364048.1;NP_001364049.1;NP_001364050.1;NP_034238.1	106644	.	2381	2339	2651	2703	2874	2681
13639	NM_007910	Efna4	ephrin A4	protein_coding	NP_031936.2	106643	.	20	28	9	13	12	13
13640	NM_010109,NM_207654,XM_006523598,XM_030249468,XM_030249469	Efna5	ephrin A5	protein_coding	NP_034239.1;NP_997537.1;XP_006523661.1;XP_030105328.1;XP_030105329.1	107444	.	183	123	142	120	263	335
13641	NM_010110	Efnb1	ephrin B1	protein_coding	NP_034240.1	102708	.	436	449	483	513	499	418
13642	NM_001368299,NM_010111,XM_011242036	Efnb2	ephrin B2	protein_coding	NP_001355228.1;NP_034241.2;XP_011240338.1	105097	.	800	621	832	894	1383	1939
13643	NM_007911,XM_006532160	Efnb3	ephrin B3	protein_coding	NP_031937.1;XP_006532223.1	109196	.	5492	7930	6741	6506	5805	7207
13644	NM_010112	Efs	embryonal Fyn-associated substrate	protein_coding	NP_034242.2	105311	.	365	492	380	374	322	404
13645	NM_001310737,NM_001329594,NM_010113,XM_006500990,XM_011240010,XM_011240011,XR_001783650	Egf	epidermal growth factor	protein_coding	NP_001297666.1;NP_001316523.1;NP_034243.2;XP_006501053.1;XP_011238312.1;XP_011238313.1	95290	.	9	13	12	17	10	16
13646	NM_010114	Klk1b22	kallikrein 1-related peptidase b22	protein_coding	NP_034244.1	95291	.	0	0	0	0	0	0
13648	NM_010116	Klk1b9	kallikrein 1-related peptidase b9	protein_coding	NP_034246.1	95293	.	0	0	0	0	0	0
13649	NM_007912,NM_207655	Egfr	epidermal growth factor receptor	protein_coding	NP_031938.1;NP_997538.1	95294	.	470	588	452	484	403	668
13650	NM_001291818,NM_010117,XM_006514494,XM_006514495,XM_006514496,XM_006514499,XM_006514501,XM_006514503,XM_011243658,XM_030245523,XM_030245524,XM_030245525,XM_030245526,XR_001779873,XR_003949287,XR_872202	Rhbdf1	rhomboid 5 homolog 1	protein_coding	NP_001278747.1;NP_034247.2;XP_006514557.1;XP_006514558.1;XP_006514559.1;XP_006514562.1;XP_006514564.1;XP_006514566.1;XP_011241960.1;XP_030101383.1;XP_030101384.1;XP_030101385.1;XP_030101386.1	104328	.	169	319	235	255	210	218
13653	NM_007913	Egr1	early growth response 1	protein_coding	NP_031939.1	95295	.	11591	6281	12582	9015	10176	8802
13654	NM_001347458,NM_001373983,NM_001373985,NM_001373986,NM_001373987,NM_010118,XM_006513209,XM_011243367,XM_011243368,XM_030244870	Egr2	early growth response 2	protein_coding	NP_001334387.1;NP_001360912.1;NP_001360914.1;NP_001360915.1;NP_001360916.1;NP_034248.2;XP_006513272.1;XP_011241669.1;XP_011241670.1;XP_030100730.1	95296	.	433	284	504	370	422	332
13655	NM_001289925,NM_001289927,NM_018781	Egr3	early growth response 3	protein_coding	NP_001276854.1;NP_001276856.1;NP_061251.1	1306780	.	5647	5135	6599	6674	5942	5214
13656	NM_020596	Egr4	early growth response 4	protein_coding	NP_065621.1	99252	.	950	838	1526	1142	1070	831
13660	NM_010119	Ehd1	EH-domain containing 1	protein_coding	NP_034249.1	1341878	.	3600	4510	3960	4351	3628	3284
13661	NM_007914,XM_006498695,XM_006498697,XM_006498698,XM_006498699,XM_006498700,XM_006498701,XM_006498702,XM_006498703	Ehf	ets homologous factor	protein_coding	NP_031940.1;XP_006498758.1;XP_006498760.1;XP_006498761.1;XP_006498762.1;XP_006498763.1;XP_006498764.1;XP_006498765.1;XP_006498766.1	1270840	.	6	0	4	0	2	0
13663	NM_001199494,NM_007915	Ei24	etoposide induced 2.4 mRNA	protein_coding	NP_001186423.2;NP_031941.2	108090	.	3432	3648	3477	3313	3572	3200
13664	NM_001374654,NM_010120	Eif1a	eukaryotic translation initiation factor 1A	protein_coding	NP_001361583.1;NP_034250.3	95298	.	1850	1795	1654	1704	1801	1506
13665	NM_026114	Eif2s1	eukaryotic translation initiation factor 2, subunit 1 alpha	protein_coding	NP_080390.1	95299	.	1692	1798	1690	1890	1783	1878
13666	NM_001313918,NM_010121,XM_006505501,XM_011241202	Eif2ak3	eukaryotic translation initiation factor 2 alpha kinase 3	protein_coding	NP_001300847.1;NP_034251.2;XP_006505564.1;XP_011239504.1	1341830	.	1127	1321	1266	1175	1031	1129
13667	NM_001127355,NM_001127356,NM_010122	Eif2b4	eukaryotic translation initiation factor 2B, subunit 4 delta	protein_coding	NP_001120827.1;NP_001120828.1;NP_034252.2	95300	.	1041	1120	1213	1097	1081	990
13669	NM_010123	Eif3a	eukaryotic translation initiation factor 3, subunit A	protein_coding	NP_034253.3	95301	.	8065	8287	8167	7986	7637	7970
13674	gene-Eif4a-ps4	Eif4a-ps4	eukaryotic translation initiation factor 4A, pseudogene 4	pseudogene	.	1195958	.	437	410	418	441	449	343
13680	NM_007916,XM_006530650	Ddx19a	DEAD box helicase 19a	protein_coding	NP_031942.2;XP_006530713.1	99526	.	863	1079	897	911	830	848
13681	NM_001159375,NM_144958	Eif4a1	eukaryotic translation initiation factor 4A1	protein_coding	NP_001152847.1;NP_659207.1	95303	.	11865	13001	12384	13258	12162	10848
13682	NM_001123037,NM_001123038,NM_001347179,NM_013506,NR_110335,NR_152586,XM_006521784,XM_006521785,XM_030248964,XM_030248965,XR_003951756,XR_003951757,XR_003951758,XR_003951759,XR_384524,XR_384525	Eif4a2	eukaryotic translation initiation factor 4A2	protein_coding	NP_001116509.1;NP_001116510.1;NP_001334108.1;NP_038534.2;XP_006521847.1;XP_006521848.1;XP_030104824.1;XP_030104825.1	106906	.	23845	22537	24267	24691	24744	23385
13684	NM_001313980,NM_007917,XM_006500993,XM_017319453	Eif4e	eukaryotic translation initiation factor 4E	protein_coding	NP_001300909.1;NP_031943.3;XP_006501056.1;XP_017174942.1	95305	.	4358	4356	4158	4091	4101	3794
13685	NM_007918	Eif4ebp1	eukaryotic translation initiation factor 4E binding protein 1	protein_coding	NP_031944.3	103267	.	69	82	71	85	45	92
13688	NM_010124,XM_017313792,XM_017313793	Eif4ebp2	eukaryotic translation initiation factor 4E binding protein 2	protein_coding	NP_034254.1;XP_017169281.1;XP_017169282.1	109198	.	3144	3747	3711	3538	3502	3344
13690	NM_001040131,NM_013507	Eif4g2	eukaryotic translation initiation factor 4, gamma 2	protein_coding	NP_001035221.1;NP_038535.2	109207	.	31099	33526	30707	31173	29628	28940
13706	NM_007919	Cela2a	chymotrypsin-like elastase family, member 2A	protein_coding	NP_031945.1	95316	.	0	0	0	0	0	0
13709	NM_001286411,NM_001286412,NM_007920,XM_011244946,XM_011244947,XM_011244948,XM_030247638,XM_030247639,XM_030247640,XM_030247641,XM_030247642	Elf1	E74-like factor 1	protein_coding	NP_001273340.1;NP_001273341.1;NP_031946.1;XP_011243248.1;XP_011243249.1;XP_011243250.1;XP_030103498.1;XP_030103499.1;XP_030103500.1;XP_030103501.1;XP_030103502.1	107180	.	282	417	283	276	203	316
13710	NM_001163131,NM_007921	Elf3	E74-like factor 3	protein_coding	NP_001156603.1;NP_031947.1	1101781	.	0	0	0	0	3	0
13711	NM_001145813,NM_010125,XM_006498705	Elf5	E74-like factor 5	protein_coding	NP_001139285.1;NP_034255.2;XP_006498768.1	1335079	.	27	60	32	26	22	45
13712	NM_007922	Elk1	ELK1, member of ETS oncogene family	protein_coding	NP_031948.4	101833	.	3472	3721	4068	4105	3760	3014
13713	NM_001282967,NM_001322265,NM_001322268,NM_013508,XM_030244871,XM_030244872	Elk3	ELK3, member of ETS oncogene family	protein_coding	NP_001269896.1;NP_001309194.1;NP_001309197.1;NP_038536.2;XP_030100731.1;XP_030100732.1	101762	.	382	478	340	455	317	408
13714	NM_001376954,NM_001376955,NM_001376956,NM_001376957,NM_001376958,NM_001376959,NM_007923,XM_006529131	Elk4	ELK4, member of ETS oncogene family	protein_coding	NP_001363883.1;NP_001363884.1;NP_001363885.1;NP_001363886.1;NP_001363887.1;NP_001363888.1;NP_031949.2;XP_006529194.1	102853	.	837	787	917	883	737	771
13716	NM_007924	Ell	elongation factor RNA polymerase II	protein_coding	NP_031950.2	109377	.	692	716	743	738	677	591
13717	NM_007925,XM_006504360,XM_011240855	Eln	elastin	protein_coding	NP_031951.2;XP_006504423.1;XP_011239157.1	95317	.	124	119	106	109	102	125
13722	NM_001368626,NM_007926	Aimp1	aminoacyl tRNA synthetase complex-interacting multifunctional protein 1	protein_coding	NP_001355555.1;NP_031952.2	102774	.	1368	1698	1468	1636	1470	1613
13723	NM_010330	Emb	embigin	protein_coding	NP_034460.3	95321	.	1211	909	723	755	786	738
13726	NM_007927,XM_011247521	Emd	emerin	protein_coding	NP_031953.1;XP_011245823.1	108117	.	1348	1408	1281	1390	1419	1187
13728	NM_001080388,NM_001080389,NM_001080390,NM_007928,XM_006526641,XM_006526642,XM_006526643,XM_006526644,XM_006526645,XM_006526646,XM_006526647,XM_006526648,XM_006526650,XM_006526652,XM_006526654,XM_006526656,XM_017318058,XM_017318059,XM_030250740,XM_030250741,XM_030250742,XM_030250743,XM_030250744	Mark2	MAP/microtubule affinity regulating kinase 2	protein_coding	NP_001073857.1;NP_001073858.1;NP_001073859.1;NP_031954.2;XP_006526704.1;XP_006526705.1;XP_006526706.1;XP_006526707.1;XP_006526708.1;XP_006526709.1;XP_006526710.1;XP_006526711.1;XP_006526713.1;XP_006526715.1;XP_006526717.1;XP_006526719.1;XP_017173547.1;XP_017173548.1;XP_030106600.1;XP_030106601.1;XP_030106602.1;XP_030106603.1;XP_030106604.1	99638	.	3939	4102	4439	4311	4014	3243
13730	NM_001288627,NM_001288628,NM_010128,XM_006505502	Emp1	epithelial membrane protein 1	protein_coding	NP_001275556.1;NP_001275557.1;NP_034258.1;XP_006505565.1	107941	.	134	180	105	107	90	151
13731	NM_007929	Emp2	epithelial membrane protein 2	protein_coding	NP_031955.2	1098726	.	1200	1463	1098	1311	1204	1414
13732	NM_001146346,NM_010129	Emp3	epithelial membrane protein 3	protein_coding	NP_001139818.1;NP_034259.2	1098729	.	26	60	31	37	16	34
13733	NM_001355722,NM_001355723,NM_010130,XM_006523602	Adgre1	adhesion G protein-coupled receptor E1	protein_coding	NP_001342651.1;NP_001342652.1;NP_034260.1;XP_006523665.1	106912	.	300	477	310	370	270	517
13796	NM_010131	Emx1	empty spiracles homeobox 1	protein_coding	NP_034261.1	95387	.	307	386	412	441	326	259
13797	NM_010132,XM_006526657	Emx2	empty spiracles homeobox 2	protein_coding	NP_034262.2;XP_006526720.1	95388	.	556	641	595	685	630	576
13798	NM_010133	En1	engrailed 1	protein_coding	NP_034263.2	95389	.	0	5	0	5	0	0
13799	NM_010134	En2	engrailed 2	protein_coding	NP_034264.1	95390	.	18	39	21	21	16	23
13800	NM_001083120,NM_001083121,NM_008680,NM_010135,XM_006496643,XM_006496644,XM_006496645,XM_006496646,XM_006496647,XM_006496648,XM_006496649,XM_006496650,XM_006496651,XM_006496652,XM_030247134,XM_030247143,XM_030247158,XM_030247170,XR_001780490	Enah	ENAH actin regulator	protein_coding	NP_001076589.1;NP_001076590.1;NP_032706.2;NP_034265.2;XP_006496706.1;XP_006496707.1;XP_006496708.1;XP_006496709.1;XP_006496710.1;XP_006496711.1;XP_006496712.1;XP_006496713.1;XP_006496714.1;XP_006496715.1;XP_030102994.1;XP_030103003.1;XP_030103018.1;XP_030103030.1	108360	.	6956	7146	7411	6956	6757	7236
13801	NM_017468,XM_030254122	Enam	enamelin	protein_coding	NP_059496.1;XP_030109982.1	1333772	.	0	0	0	0	0	0
13803	NM_007930,XM_030247137,XM_030247138,XM_030247139	Enc1	ectodermal-neural cortex 1	protein_coding	NP_031956.3;XP_030102997.1;XP_030102998.1;XP_030102999.1	109610	.	47537	46662	52484	51640	44851	31984
13804	NM_007931,XR_374059	Endog	endonuclease G	protein_coding	NP_031957.1	1261433	.	167	243	265	256	216	177
13805	NM_001146348,NM_001146350,NM_007932	Eng	endoglin	protein_coding	NP_001139820.1;NP_001139822.1;NP_031958.2	95392	.	773	795	796	838	734	556
13806	NM_001379127,NM_001379128,NM_023119	Eno1	enolase 1, alpha non-neuron	protein_coding	NP_001366056.1;NP_001366057.1;NP_075608.2	95393	.	33645	32994	34034	35156	35798	26375
13807	NM_001302642,NM_001355220,NM_013509,XM_006505504,XM_030255143	Eno2	enolase 2, gamma neuronal	protein_coding	NP_001289571.1;NP_001342149.1;NP_038537.1;XP_006505567.1;XP_030111003.1	95394	.	35375	33703	39302	37321	39116	29843
13808	NM_001136062,NM_001276285,NM_007933,XM_006532161,XM_006532162,XM_030245527	Eno3	enolase 3, beta muscle	protein_coding	NP_001129534.1;NP_001263214.1;NP_031959.1;XP_006532224.1;XP_006532225.1;XP_030101387.1	95395	.	96	132	134	88	101	122
13809	NM_007934	Enpep	glutamyl aminopeptidase	protein_coding	NP_031960.1	106645	.	84	116	87	110	95	111
13813	NM_001164789,NM_010136,XM_006511940	Eomes	eomesodermin	protein_coding	NP_001158261.1;NP_034266.2;XP_006512003.1	1201683	.	15	9	10	19	9	10
13819	NM_010137,XM_030249471	Epas1	endothelial PAS domain protein 1	protein_coding	NP_034267.3;XP_030105331.1	109169	.	5995	6673	6612	6654	5554	6147
13821	NM_001006664,NM_001291120,NM_001291121,NM_001291122,NM_001291123,NM_001368800,NM_001368801,NM_001368802,NM_001368803,NM_001368804,NM_013510,XM_006498708,XM_006498711,XM_006498713,XM_006498714,XM_011239275,XM_011239276,XM_011239277,XM_011239278,XM_011239279,XM_011239280,XM_011239281,XM_030247261,XM_030247268,XM_030247271,XM_030247275,XM_030247277,XM_030247281,XM_030247282,XM_030247284,XM_030247286…	Epb41l1	erythrocyte membrane protein band 4.1 like 1	protein_coding	NP_001006665.1;NP_001278049.1;NP_001278050.1;NP_001278051.1;NP_001278052.1;NP_001355729.1;NP_001355730.1;NP_001355731.1;NP_001355732.1;NP_001355733.1;NP_038538.1;XP_006498771.1;XP_006498774.1;XP_006498776.1;XP_006498777.1;XP_011237577.1;XP_011237578.1;XP_011237579.1;XP_011237580.1;XP_011237581.1;XP_011237582.1;XP_011237583.1;XP_030103121.1;XP_030103128.1;XP_030103131.1;XP_030103135.1;XP_030103137…	103010	.	23111	21190	26331	24087	22563	17223
13822	NM_001199265,NM_001358751,NM_001358753,NM_001358754,NM_001358755,NM_013511,XM_006512506,XM_006512507,XM_006512508,XM_006512509,XM_006512510,XM_006512511,XM_006512512,XM_006512513,XM_006512514,XM_006512515,XM_006512517,XM_030244873,XM_030244874,XM_030244875,XR_001779454	Epb41l2	erythrocyte membrane protein band 4.1 like 2	protein_coding	NP_001186194.1;NP_001345680.1;NP_001345682.1;NP_001345683.1;NP_001345684.1;NP_038539.2;XP_006512569.1;XP_006512570.1;XP_006512571.1;XP_006512572.1;XP_006512573.1;XP_006512574.1;XP_006512575.1;XP_006512576.1;XP_006512577.1;XP_006512578.1;XP_006512580.1;XP_030100733.1;XP_030100734.1;XP_030100735.1	103009	.	2643	4113	3274	3382	2603	3521
13823	NM_001355732,NM_001355733,NM_001355734,NM_001355735,NM_001355736,NM_013813,XM_006523611,XM_006523612,XM_006523613,XM_006523614,XM_006523615,XM_006523616,XM_006523618,XM_011246278,XM_011246279,XM_011246281,XM_011246283,XM_011246284,XM_011246285,XM_011246288,XM_011246290,XM_017317227,XM_017317231,XM_017317232,XM_017317234,XM_017317238,XM_017317239,XM_030249472,XM_030249473,XM_030249474,XM_030249475…	Epb41l3	erythrocyte membrane protein band 4.1 like 3	protein_coding	NP_001342661.1;NP_001342662.1;NP_001342663.1;NP_001342664.1;NP_001342665.1;NP_038841.1;XP_006523674.1;XP_006523675.1;XP_006523676.1;XP_006523677.1;XP_006523678.1;XP_006523679.1;XP_006523681.1;XP_011244580.1;XP_011244581.1;XP_011244583.1;XP_011244585.1;XP_011244586.1;XP_011244587.1;XP_011244590.1;XP_011244592.1;XP_017172716.1;XP_017172720.1;XP_017172721.1;XP_017172723.1;XP_017172727.1;XP_017172728…	103008	.	6894	6984	7229	6664	6246	5665
13824	NM_013512,XM_006525627,XM_006525628,XM_006525629,XM_006525631,XM_006525635,XM_011246840,XM_030250326,XM_030250327,XM_030250328,XM_030250329,XM_030250330	Epb41l4a	erythrocyte membrane protein band 4.1 like 4a	protein_coding	NP_038540.2;XP_006525690.1;XP_006525691.1;XP_006525692.1;XP_006525694.1;XP_006525698.1;XP_011245142.1;XP_030106186.1;XP_030106187.1;XP_030106188.1;XP_030106189.1;XP_030106190.1	103007	.	183	304	171	189	268	256
13828	NM_013513,XM_006498727	Epb42	erythrocyte membrane protein band 4.2	protein_coding	NP_038541.1;XP_006498790.1	95402	.	0	0	0	0	2	0
13829	NM_001252662,NM_001252663,NM_001252664,NM_001252665,NM_001252666,NM_001360024,NM_001360025,NM_001360026,NM_001360027,NM_001360028,NM_001360029,NM_001360030,NM_013514	Dmtn	dematin actin binding protein	protein_coding	NP_001239591.1;NP_001239592.1;NP_001239593.1;NP_001239594.1;NP_001239595.1;NP_001346953.1;NP_001346954.1;NP_001346955.1;NP_001346956.1;NP_001346957.1;NP_001346958.1;NP_001346959.1;NP_038542.1	99670	.	10992	10254	12618	12286	11705	8779
13830	NM_013515	Stom	stomatin	protein_coding	NP_038543.1	95403	.	521	981	510	667	541	782
13831	NM_001276350,NM_007935,NM_027497	Epc1	enhancer of polycomb homolog 1	protein_coding	NP_001263279.1;NP_031961.1;NP_081773.1	1278322	.	1222	1374	1271	1424	1260	1250
13835	NM_023580,XM_011241203	Epha1	Eph receptor A1	protein_coding	NP_076069.2;XP_011239505.1	107381	.	12	0	6	4	0	0
13836	NM_010139,XM_006538528	Epha2	Eph receptor A2	protein_coding	NP_034269.2;XP_006538591.1	95278	.	39	65	47	79	43	41
13837	NM_001362452,NM_010140	Epha3	Eph receptor A3	protein_coding	NP_001349381.1;NP_034270.1	99612	.	691	549	660	649	567	493
13838	NM_007936,XM_006496407,XM_006496408	Epha4	Eph receptor A4	protein_coding	NP_031962.2;XP_006496470.1;XP_006496471.1	98277	.	26258	23994	26406	24499	20553	16539
13839	NM_007937,XM_006534769,XM_006534770,XM_006534771,XM_006534773,XM_006534775,XM_030254123,XM_030254124,XM_030254125	Epha5	Eph receptor A5	protein_coding	NP_031963.2;XP_006534832.1;XP_006534833.1;XP_006534834.1;XP_006534836.1;XP_006534838.1;XP_030109983.1;XP_030109984.1;XP_030109985.1	99654	.	6017	4487	7127	5135	5138	3379
13840	NM_007938,XM_006521787,XM_011245826	Epha6	Eph receptor A6	protein_coding	NP_031964.2;XP_006521850.1;XP_011244128.1	108034	.	12079	7810	12945	9835	8809	7606
13841	NM_001122889,NM_001290434,NM_010141,XM_006537606,XM_006537607,XM_017319954,XM_017319955	Epha7	Eph receptor A7	protein_coding	NP_001116361.1;NP_001277363.1;NP_034271.3;XP_006537669.1;XP_006537670.1;XP_017175443.1;XP_017175444.1	95276	.	9432	8893	10978	9559	8259	6282
13842	NM_007939,XM_030253187,XM_030253189,XR_003954873	Epha8	Eph receptor A8	protein_coding	NP_031965.2;XP_030109047.1;XP_030109049.1	109378	.	40	32	64	31	49	40
13844	NM_001290753,NM_010142,XM_006538531,XM_006538533,XM_006538534,XM_030253190,XM_030253191	Ephb2	Eph receptor B2	protein_coding	NP_001277682.1;NP_034272.1;XP_006538594.1;XP_006538596.1;XP_006538597.1;XP_030109050.1;XP_030109051.1	99611	.	1575	1432	2016	1542	1556	982
13845	NM_010143,XM_006521788	Ephb3	Eph receptor B3	protein_coding	NP_034273.1;XP_006521851.1	104770	.	683	463	918	694	781	727
13846	NM_001159571,NM_010144	Ephb4	Eph receptor B4	protein_coding	NP_001153043.1;NP_034274.4	104757	.	190	271	228	271	165	257
13848	NM_001146351,NM_007680,NR_166495,XM_030255144,XR_003956161	Ephb6	Eph receptor B6	protein_coding	NP_001139823.1;NP_031706.3;XP_030111004.1	1096338	.	3104	3011	3361	3329	3209	2549
13849	NM_001312918,NM_010145	Ephx1	epoxide hydrolase 1, microsomal	protein_coding	NP_001299847.1;NP_034275.1	95405	.	1576	1628	1458	1502	1203	1224
13850	NM_001271402,NM_001271403,NM_001271421,NM_007940	Ephx2	epoxide hydrolase 2, cytoplasmic	protein_coding	NP_001258331.1;NP_001258332.1;NP_001258350.1;NP_031966.2	99500	.	714	767	832	841	816	770
13852	NM_001286033,NM_001286034,NM_001359022,NM_007941,NR_152615,XM_006504276,XR_003955580,XR_003955581,XR_377049	Stx2	syntaxin 2	protein_coding	NP_001272962.1;NP_001272963.1;NP_001345951.1;NP_031967.2;XP_006504339.1	108059	.	323	482	427	401	322	347
13853	NM_010146,XR_003948588	Epm2a	epilepsy, progressive myoclonic epilepsy, type 2 gene alpha	protein_coding	NP_034276.2	1341085	.	1397	1629	1385	1554	1506	1405
13854	NM_001252454,NM_001372500,NM_010147,XM_006539529,XM_006539531,XM_006539532,XM_006539534,XM_006539535,XM_006539536,XM_006539537,XM_017321973,XM_017321974,XM_030242096,XM_030242097,XM_030242098,XM_030242099,XM_030242100,XM_030242102,XM_030242103,XM_030242104,XM_030242105,XM_030242106,XM_030242107,XM_030242108,XM_030242109,XM_030242110,XM_030242111,XM_030242112,XM_030242113,XM_030242114,XM_030242115…	Epn1	epsin 1	protein_coding	NP_001239383.1;NP_001359429.1;NP_034277.1;XP_006539592.2;XP_006539594.2;XP_006539595.2;XP_006539597.1;XP_006539598.1;XP_006539599.1;XP_006539600.1;XP_017177462.1;XP_017177463.1;XP_030097956.1;XP_030097957.1;XP_030097958.1;XP_030097959.1;XP_030097960.1;XP_030097962.1;XP_030097963.1;XP_030097964.1;XP_030097965.1;XP_030097966.1;XP_030097967.1;XP_030097968.1;XP_030097969.1;XP_030097970.1;XP_030097971…	1333763	.	16709	15456	19091	18971	17870	14710
13855	NM_001252188,NM_001252189,NM_001362585,NM_001362586,NM_001362587,NM_010148,XM_006532165,XM_006532166,XM_006532167,XM_006532168,XM_006532169,XM_006532170,XM_006532171,XM_011248711,XM_011248712,XM_011248713,XM_030245528,XM_030245529,XM_030245530,XM_030245531,XM_030245532,XM_030245533,XM_030245534,XM_030245535,XM_030245536,XM_030245537,XM_030245538,XM_030245539,XM_030245540,XM_030245541	Epn2	epsin 2	protein_coding	NP_001239117.1;NP_001239118.1;NP_001349514.1;NP_001349515.1;NP_001349516.1;NP_034278.1;XP_006532228.1;XP_006532229.1;XP_006532230.1;XP_006532231.1;XP_006532232.1;XP_006532233.1;XP_006532234.1;XP_011247013.1;XP_011247014.1;XP_011247015.1;XP_030101388.1;XP_030101389.1;XP_030101390.1;XP_030101391.1;XP_030101392.1;XP_030101393.1;XP_030101394.1;XP_030101395.1;XP_030101396.1;XP_030101397.1;XP_030101398…	1333766	.	6925	7863	8564	8482	7328	6703
13856	NM_001312875,NM_007942	Epo	erythropoietin	protein_coding	NP_001299804.1;NP_031968.1	95407	.	2	0	0	0	0	0
13857	NM_010149,XM_006509998,XM_017313130,XR_001778795	Epor	erythropoietin receptor	protein_coding	NP_034279.3;XP_006510061.1;XP_017168619.1	95408	.	158	145	181	130	135	95
13858	NM_001159964,NM_007943,XM_006502738,XM_006502739,XM_006502740,XM_017319956,XM_030253192	Eps15	epidermal growth factor receptor pathway substrate 15	protein_coding	NP_001153436.1;NP_031969.1;XP_006502801.2;XP_006502802.2;XP_006502803.2;XP_017175445.1;XP_030109052.1	104583	.	14776	15437	14881	14172	13591	14115
13859	NM_001122832,NM_001289859,NM_007944,XM_006509544,XM_006509545,XM_006509546,XM_006509547,XM_006509548,XM_006509550,XM_017312559,XM_017312560,XR_001778398,XR_001778399,XR_001778400,XR_001778401,XR_003947228,XR_003947229,XR_003947230,XR_003947231,XR_379029,XR_379030,XR_379031,XR_379032	Eps15l1	epidermal growth factor receptor pathway substrate 15-like 1	protein_coding	NP_001116304.1;NP_001276788.1;NP_031970.2;XP_006509607.1;XP_006509608.1;XP_006509609.1;XP_006509610.1;XP_006509611.1;XP_006509613.1;XP_017168048.1;XP_017168049.1	104582	.	1616	1655	1754	1699	1647	1435
13860	NM_001271587,NM_001271588,NM_001271589,NM_001271595,NM_007945,XM_006505508,XM_011241204,XM_017321383,XM_030255145	Eps8	epidermal growth factor receptor pathway substrate 8	protein_coding	NP_001258516.1;NP_001258517.1;NP_001258518.1;NP_001258524.1;NP_031971.2;XP_006505571.1;XP_011239506.1;XP_017176872.1;XP_030111005.1	104684	.	1409	1510	1562	1599	1649	1941
13861	NM_007946,XM_006532173,XM_006532174	Epx	eosinophil peroxidase	protein_coding	NP_031972.2;XP_006532236.1;XP_006532237.1	107569	.	7	22	9	7	0	5
13863	NM_001042630,NM_001276257,NM_007947,XM_006497665,XM_006497666,XM_006497667,XM_006497668,XM_006497669	Lcn5	lipocalin 5	protein_coding	NP_001036095.1;NP_001263186.1;NP_031973.2;XP_006497728.1;XP_006497729.1;XP_006497730.1;XP_006497731.1;XP_006497732.1	1277241	.	0	0	0	0	0	0
13864	NM_010150,XM_006509553,XM_011242264,XM_011242265	Nr2f6	nuclear receptor subfamily 2, group F, member 6	protein_coding	NP_034280.2;XP_006509616.1;XP_011240566.1;XP_011240567.1	1352453	.	483	643	706	628	529	524
13865	NM_001347538,NM_001347539,NM_010151,XM_006517085,XM_017315378,XM_030247140	Nr2f1	nuclear receptor subfamily 2, group F, member 1	protein_coding	NP_001334467.1;NP_001334468.1;NP_034281.2;XP_006517148.1;XP_017170867.1;XP_030103000.1	1352451	.	1430	1665	1525	1662	1841	1854
13866	NM_001003817	Erbb2	erb-b2 receptor tyrosine kinase 2	protein_coding	NP_001003817.1	95410	.	95	129	107	114	74	121
13867	NM_010153	Erbb3	erb-b2 receptor tyrosine kinase 3	protein_coding	NP_034283.1	95411	.	715	1206	874	750	469	701
13869	NM_010154,XM_006495692,XM_006495693,XM_006495694,XM_006495695	Erbb4	erb-b2 receptor tyrosine kinase 4	protein_coding	NP_034284.1;XP_006495755.1;XP_006495756.1;XP_006495757.1;XP_006495758.1	104771	.	2463	2040	2334	2126	2208	2496
13870	NM_001127324,NM_007948,XM_006539539	Ercc1	excision repair cross-complementing rodent repair deficiency, complementation group 1	protein_coding	NP_001120796.1;NP_031974.2;XP_006539602.1	95412	.	461	508	509	503	478	336
13871	NM_001363981,NM_007949	Ercc2	excision repair cross-complementing rodent repair deficiency, complementation group 2	protein_coding	NP_001350910.1;NP_031975.2	95413	.	788	939	949	922	841	745
13872	NM_133658,XM_006525636,XR_385973	Ercc3	excision repair cross-complementing rodent repair deficiency, complementation group 3	protein_coding	NP_598419.1;XP_006525699.1	95414	.	1402	1529	1579	1510	1482	1433
13874	NM_007950	Ereg	epiregulin	protein_coding	NP_031976.1	107508	.	0	0	0	0	0	0
13875	NM_010155,XM_030242128,XM_030242129,XM_030242130	Erf	Ets2 repressor factor	protein_coding	NP_034285.3;XP_030097988.1;XP_030097989.1;XP_030097990.1	109637	.	1392	1638	1603	1518	1396	1153
13876	NM_001302152,NM_001302153,NM_001302154,NM_001302179,NM_001302183,NM_133659,XM_006522894,XM_006522895,XM_006522896,XM_006522899,XM_006522900,XM_006522903,XM_006522904,XM_030248966,XM_030248967,XM_030248968,XM_030248969,XM_030248970,XM_030248971,XM_030248972,XM_030248973	Erg	ETS transcription factor	protein_coding	NP_001289081.1;NP_001289082.1;NP_001289083.1;NP_001289108.1;NP_001289112.1;NP_598420.1;XP_006522957.1;XP_006522958.1;XP_006522959.1;XP_006522962.1;XP_006522963.1;XP_006522966.1;XP_006522967.1;XP_030104826.1;XP_030104827.1;XP_030104828.1;XP_030104829.1;XP_030104830.1;XP_030104831.1;XP_030104832.1;XP_030104833.1	95415	.	146	263	181	197	166	170
13877	NM_001347409,NM_007951,XM_011243995	Erh	ERH mRNA splicing and mitosis factor	protein_coding	NP_001334338.1;NP_031977.1;XP_011242297.1	108089	.	1454	1588	1463	1505	1612	1392
13884	NM_007954	Ces1c	carboxylesterase 1C	protein_coding	NP_031980.2	95420	.	0	0	0	0	0	0
13885	NM_001285423,NM_016903,XM_006518543,XM_030247645	Esd	esterase D/formylglutathione hydrolase	protein_coding	NP_001272352.1;NP_058599.1;XP_006518606.1;XP_030103505.1	95421	.	2288	2480	2277	2316	2372	2264
13897	NM_133660,XM_006530651	Ces1e	carboxylesterase 1E	protein_coding	NP_598421.1;XP_006530714.1	95432	.	0	0	0	0	0	0
13909	NM_001159415,NM_144511,XM_006530653,XM_006530654,XM_006530655,XM_006530656,XM_006530657,XM_006530658,XM_006530659,XM_017312561	Ces3b	carboxylesterase 3B	protein_coding	NP_001152887.1;NP_653094.2;XP_006530716.1;XP_006530717.1;XP_006530718.1;XP_006530719.1;XP_006530720.1;XP_006530721.1;XP_006530722.1;XP_017168050.1	3644960	.	0	0	0	0	0	0
13924	NR_153383	Ptprv	protein tyrosine phosphatase, receptor type, V	transcribed_pseudogene	.	108027	.	0	0	0	0	0	0
13929	NM_001252193,NM_025275	Amz2	archaelysin family metallopeptidase 2	protein_coding	NP_001239122.1;NP_079551.3	104837	.	1667	1785	1706	1762	1904	1616
13972	NM_001081682,NM_001285491,NM_001285493,NM_001285494,NM_023120,NR_104347,XM_011245828,XM_011245829,XM_011245830,XM_011245831,XM_011245832,XM_017316874,XM_030248974,XM_030248975,XM_030248976,XR_003951760	Gnb1l	guanine nucleotide binding protein (G protein), beta polypeptide 1-like	protein_coding	NP_001075151.1;NP_001272420.1;NP_001272422.1;NP_001272423.1;NP_075609.2;XP_011244130.1;XP_011244131.1;XP_011244132.1;XP_011244133.1;XP_011244134.1;XP_017172363.1;XP_030104834.1;XP_030104835.1;XP_030104836.1	1338057	.	113	136	139	145	129	131
13982	NM_001302531,NM_001302532,NM_001302533,NM_007956,NR_126357,XM_006512433,XM_006512434,XM_006512435,XM_011243066,XM_011243067,XM_011243068,XM_017313797	Esr1	estrogen receptor 1 (alpha)	protein_coding	NP_001289460.1;NP_001289461.1;NP_001289462.1;NP_031982.1;XP_006512496.1;XP_006512497.1;XP_006512498.1;XP_011241368.1;XP_011241369.1;XP_011241370.1;XP_017169286.1	1352467	.	95	69	105	100	130	157
13983	NM_010157,NM_207707,NR_104386	Esr2	estrogen receptor 2 (beta)	protein_coding	NP_034287.3;NP_997590.1	109392	.	4	0	0	0	0	7
13984	NM_007957,XM_006528498	Esx1	extraembryonic, spermatogenesis, homeobox 1	protein_coding	NP_031983.2;XP_006528561.1	1096388	.	0	0	0	0	0	0
13990	NM_001253392,NM_001355248,NM_001355249,NM_001355250,NM_007958,XM_006505510,XM_006505512,XM_006505513,XM_011241205,XR_003956162,XR_003956163	Smarcad1	SWI/SNF-related, matrix-associated actin-dependent regulator of chromatin, subfamily a, containing DEAD/H box 1	protein_coding	NP_001240321.1;NP_001342177.1;NP_001342178.1;NP_001342179.1;NP_031984.1;XP_006505573.1;XP_006505575.1;XP_006505576.1;XP_011239507.1	95453	.	1067	1237	1108	1139	1033	1081
13992	NM_010158,XM_006520410,XR_383979	Khdrbs3	KH domain containing, RNA binding, signal transduction associated 3	protein_coding	NP_034288.2;XP_006520473.1	1313312	.	7019	5727	7169	6948	7811	6717
13996	NR_015349	Etohd2	ethanol decreased 2	lncRNA	.	1261417	.	15	29	45	26	15	46
13998	NM_053072,XM_006513214,XM_030244876,XR_003948589	Fgd6	FYVE, RhoGEF and PH domain containing 6	protein_coding	NP_444302.4;XP_006513277.1;XP_030100736.1	1261419	.	648	882	854	838	639	915
13999	NM_001033123,XM_017315404	Gm14288	predicted gene 14288	protein_coding	NP_001028295.2;XP_017170893.1	3706570	.	109	97	96	98	90	85
14000	NM_001130149,NM_026799,XM_006520021,XR_383823	Drosha	drosha, ribonuclease type III	protein_coding	NP_001123621.1;NP_081075.3;XP_006520084.1	1261425	.	4402	4104	4461	4314	4397	4234
14004	NM_024166	Chchd2	coiled-coil-helix-coiled-coil-helix domain containing 2	protein_coding	NP_077128.2	1261428	.	5178	5979	5698	5840	5890	7028
14007	NM_001110228,NM_001110229,NM_001110230,NM_001110231,NM_001110232,NM_001160292,NM_001160293,NM_001310447,NM_001347094,NM_010160,XM_006497333,XM_006497334,XM_006497335,XM_006497336,XM_006497337,XM_006497338,XM_006497339,XM_011238949,XM_011238953,XM_017315442,XM_017315443,XM_017315466,XM_030247313,XM_030247314,XM_030247317,XM_030247319,XM_030247320,XM_030247323,XM_030247325,XM_030247326,XM_030247328…	Celf2	CUGBP, Elav-like family member 2	protein_coding	NP_001103698.1;NP_001103699.1;NP_001103700.1;NP_001103701.1;NP_001103702.1;NP_001153764.1;NP_001153765.1;NP_001297376.1;NP_001334023.1;NP_034290.2;XP_006497396.1;XP_006497397.1;XP_006497398.1;XP_006497399.1;XP_006497400.1;XP_006497401.1;XP_006497402.1;XP_011237251.2;XP_011237255.1;XP_017170931.1;XP_017170932.2;XP_017170955.1;XP_030103173.1;XP_030103174.1;XP_030103177.1;XP_030103179.1;XP_030103180…	1338822	.	15714	14744	16262	15385	14525	11778
14008	NM_007959,XM_006539541,XM_006539542	Etv2	ets variant 2	protein_coding	NP_031985.2;XP_006539604.1;XP_006539605.1	99253	.	0	0	0	0	0	0
14009	NM_001163154,NM_001347379,NM_007960,XM_006514964,XM_006514965,XM_006514966,XM_006514968,XM_006514969,XM_006514970,XM_006514971,XM_006514972	Etv1	ets variant 1	protein_coding	NP_001156626.1;NP_001334308.1;NP_031986.1;XP_006515027.1;XP_006515028.1;XP_006515029.1;XP_006515031.1;XP_006515032.1;XP_006515033.1;XP_006515034.1;XP_006515035.1	99254	.	3179	3021	3256	2918	3692	4112
14011	NM_001303102,NM_007961,XM_011241206,XM_011241207,XM_011241208	Etv6	ets variant 6	protein_coding	NP_001290031.1;NP_031987.3;XP_011239508.1;XP_011239509.1;XP_011239510.1	109336	.	478	548	496	494	502	529
14012	NM_001357727,NM_007962	Mpzl2	myelin protein zero-like 2	protein_coding	NP_001344656.1;NP_031988.2	1289160	.	28	27	22	42	14	26
14013	NM_001361034,NM_001370768,NM_001370769,NM_007963,NM_021442,XM_006535393,XM_006535394,XM_011249656,XM_011249659,XM_011249660,XM_011249661,XM_011249662,XM_011249663,XM_011249664,XM_017319454,XM_030252416	Mecom	MDS1 and EVI1 complex locus	protein_coding	NP_001347963.1;NP_001357697.1;NP_001357698.1;NP_031989.2;NP_067417.1;XP_006535456.1;XP_006535457.1;XP_011247958.1;XP_011247961.1;XP_011247962.1;XP_011247963.1;XP_011247964.1;XP_011247965.1;XP_011247966.1;XP_017174943.1;XP_030108276.1	95457	.	98	112	93	83	57	81
14017	NM_001033711,NM_010161	Evi2a	ecotropic viral integration site 2a	protein_coding	NP_001028883.1;NP_034291.1	95458	.	1355	2644	1633	1570	1027	1867
14020	NM_001378824,NM_001378825,NM_007964,XM_006534776,XM_006534777,XM_006534779,XM_006534780,XM_006534781,XM_006534783,XM_006534784,XM_006534785,XM_006534786,XM_006534787,XM_011249407,XM_011249408,XM_030254127,XM_030254128	Evi5	ecotropic viral integration site 5	protein_coding	NP_001365753.1;NP_001365754.1;NP_031990.2;XP_006534839.1;XP_006534840.1;XP_006534842.1;XP_006534843.1;XP_006534844.1;XP_006534846.1;XP_006534847.1;XP_006534848.1;XP_006534849.1;XP_006534850.1;XP_011247709.1;XP_011247710.1;XP_030109987.1;XP_030109988.1	104736	.	2357	2511	2373	2394	2309	2358
14025	NM_001159289,NM_001159290,NM_001242934,NM_016707,XM_006514504,XM_006514505,XM_006514507,XM_011243659,XM_011243660,XM_030245542,XM_030245543,XM_030245544,XM_030245545,XM_030245546,XM_030245547,XM_030245548	Bcl11a	B cell CLL/lymphoma 11A (zinc finger protein)	protein_coding	NP_001152761.1;NP_001152762.1;NP_001229863.1;NP_057916.1;XP_006514567.1;XP_006514568.1;XP_006514570.1;XP_011241961.1;XP_011241962.1;XP_030101402.1;XP_030101403.1;XP_030101404.1;XP_030101405.1;XP_030101406.1;XP_030101407.1;XP_030101408.1	106190	.	4026	3316	4390	4065	3935	2951
14026	NM_001163394,NM_001163395,NM_001163396,NM_007965,XM_006515470,XM_006515471,XM_030246555,XM_030246556	Evl	Ena-vasodilator stimulated phosphoprotein	protein_coding	NP_001156866.1;NP_001156867.1;NP_001156868.1;NP_031991.3;XP_006515533.1;XP_006515534.1;XP_030102415.1;XP_030102416.1	1194884	.	2579	2476	2825	2802	2696	2367
14027	NM_025276,XM_017314254,XM_030245549	Evpl	envoplakin	protein_coding	NP_079552.3;XP_017169743.1;XP_030101409.1	107507	.	55	59	45	47	48	43
14028	NM_007966,XM_006505516	Evx1	even-skipped homeobox 1	protein_coding	NP_031992.1;XP_006505579.1	95461	.	0	0	2	0	0	0
14029	NM_007967,XM_006498728,XM_006498729	Evx2	even-skipped homeobox 2	protein_coding	NP_031993.1;XP_006498791.1;XP_006498792.1	95462	.	0	0	0	0	0	0
14030	NM_001283061,NM_001283062,NM_001283063,NM_001362612,NM_001362613,NM_001362614,NM_001362615,NM_001362616,NM_001362617,NM_001362618,NM_001362620,NM_007968,XM_006514508,XM_006514509,XM_006514510,XM_017314255,XM_030245550,XR_001779874,XR_003949296	Ewsr1	Ewing sarcoma breakpoint region 1	protein_coding	NP_001269990.1;NP_001269991.1;NP_001269992.1;NP_001349541.1;NP_001349542.1;NP_001349543.1;NP_001349544.1;NP_001349545.1;NP_001349546.1;NP_001349547.1;NP_001349549.1;NP_031994.2;XP_006514571.1;XP_006514572.1;XP_006514573.1;XP_017169744.1;XP_030101410.1	99960	.	5935	6232	6579	6352	5982	5043
14038	NM_007969	Wfdc18	WAP four-disulfide core domain 18	protein_coding	NP_031995.3	107506	.	22	44	22	26	20	24
14042	NM_010162	Ext1	exostosin glycosyltransferase 1	protein_coding	NP_034292.2	894663	.	1373	1335	1467	1431	1373	1292
14043	NM_001355075,NM_001355076,NM_010163,XM_006498730,XM_006498731,XM_006498733	Ext2	exostosin glycosyltransferase 2	protein_coding	NP_001342004.1;NP_001342005.1;NP_034293.2;XP_006498793.1;XP_006498794.1;XP_006498796.1	108050	.	1593	1876	1697	1719	1520	1507
14048	NM_001252192,NM_001310459,NM_010164,XM_006495446,XM_006495451,XM_006495452,XM_011238344,XM_011238346,XM_017315348,XM_017315381,XM_017315414,XM_017315422,XM_030247470,XR_001780756,XR_003950638	Eya1	EYA transcriptional coactivator and phosphatase 1	protein_coding	NP_001239121.1;NP_001297388.1;NP_034294.2;XP_006495509.1;XP_006495514.1;XP_006495515.1;XP_011236646.1;XP_011236648.1;XP_017170837.1;XP_017170870.1;XP_017170903.1;XP_017170911.1;XP_030103330.1	109344	.	572	695	758	693	634	679
14049	NM_001271962,NM_001271963,NM_010165,XM_006498739	Eya2	EYA transcriptional coactivator and phosphatase 2	protein_coding	NP_001258891.1;NP_001258892.1;NP_034295.1;XP_006498802.1	109341	.	56	57	73	70	75	78
14050	NM_010166,NM_210071,NM_211357,XM_006538537,XM_006538538,XM_006538540	Eya3	EYA transcriptional coactivator and phosphatase 3	protein_coding	NP_034296.2;NP_997592.1;NP_997596.1;XP_006538600.1;XP_006538601.1;XP_006538603.1	109339	.	1174	1191	1341	1248	1221	1093
14051	NM_001347372,NM_010167,XM_006512523,XM_006512524,XM_006512526,XM_006512527,XM_006512528,XM_006512529,XM_006512530,XM_011243112,XM_011243115,XM_017313798,XM_017313799,XM_030244877,XM_030244878,XM_030244879,XM_030244880,XR_001779457	Eya4	EYA transcriptional coactivator and phosphatase 4	protein_coding	NP_001334301.1;NP_034297.2;XP_006512586.1;XP_006512587.1;XP_006512589.1;XP_006512590.1;XP_006512591.1;XP_006512592.1;XP_006512593.1;XP_011241414.1;XP_011241417.1;XP_017169287.1;XP_017169288.1;XP_030100737.1;XP_030100738.1;XP_030100739.1;XP_030100740.1	1337104	.	207	357	225	243	166	283
14055	NM_007970,XM_006532178	Ezh1	enhancer of zeste 1 polycomb repressive complex 2 subunit	protein_coding	NP_031996.1;XP_006532241.1	1097695	.	3163	3457	3445	3454	3470	3018
14056	NM_001146689,NM_007971,XM_006505520,XM_006505521,XM_006505523,XM_006505524,XM_006505525,XM_006505526,XM_006505527,XM_006505528,XM_006505529,XM_030255150,XM_030255151,XM_030255152,XM_030255154,XM_030255155	Ezh2	enhancer of zeste 2 polycomb repressive complex 2 subunit	protein_coding	NP_001140161.1;NP_031997.2;XP_006505583.1;XP_006505584.1;XP_006505586.1;XP_006505587.1;XP_006505588.1;XP_006505589.1;XP_006505590.1;XP_006505591.1;XP_006505592.1;XP_030111010.1;XP_030111011.1;XP_030111012.1;XP_030111014.1;XP_030111015.1	107940	.	104	154	105	99	107	137
14057	NM_027324,XM_006516849,XM_006516850,XR_003950424,XR_003950425	Sfxn1	sideroflexin 1	protein_coding	NP_081600.1;XP_006516912.2;XP_006516913.1	2137677	.	1934	2198	2043	2182	2153	2043
14058	NM_001242368,NM_007972	F10	coagulation factor X	protein_coding	NP_001229297.1;NP_031998.3	103107	.	0	0	0	0	0	0
14060	NM_031164,XM_006529132,XM_006529133	F13b	coagulation factor XIII, beta subunit	protein_coding	NP_112441.2;XP_006529195.1;XP_006529196.1	88379	.	0	0	0	0	0	0
14061	NM_010168,XM_011239288,XM_030247399	F2	coagulation factor II	protein_coding	NP_034298.1;XP_011237590.1;XP_030103259.1	88380	.	0	0	0	1	0	0
14062	NM_010169	F2r	coagulation factor II (thrombin) receptor	protein_coding	NP_034299.2	101802	.	242	286	221	250	226	217
14063	NM_007974	F2rl1	coagulation factor II (thrombin) receptor-like 1	protein_coding	NP_032000.3	101910	.	3	6	9	0	0	5
14064	NM_010170	F2rl2	coagulation factor II (thrombin) receptor-like 2	protein_coding	NP_034300.3	1298208	.	6	6	10	10	9	4
14065	NM_007975	F2rl3	coagulation factor II (thrombin) receptor-like 3	protein_coding	NP_032001.2	1298207	.	6	7	0	0	3	0
14066	NM_010171	F3	coagulation factor III	protein_coding	NP_034301.3	88381	.	1409	2501	1802	1955	1620	1774
14067	NM_007976	F5	coagulation factor V	protein_coding	NP_032002.1	88382	.	1972	99	109	50	216	231
14068	NM_010172,XR_003947232	F7	coagulation factor VII	protein_coding	NP_034302.2	109325	.	0	8	0	0	0	0
14069	NM_001161373,NM_001161374,NM_007977,XM_006527789,XM_006527790,XM_006527791,XM_006527792	F8	coagulation factor VIII	protein_coding	NP_001154845.1;NP_001154846.1;NP_032003.2;XP_006527852.1;XP_006527853.1;XP_006527854.1;XP_006527855.1	88383	.	123	145	120	109	103	117
14070	NM_007978	F8a	factor 8-associated gene A	protein_coding	NP_032004.2	95474	.	433	415	471	402	452	413
14071	NM_001305797,NM_007979,XM_030251221	F9	coagulation factor IX	protein_coding	NP_001292726.1;NP_032005.1;XP_030107081.1	88384	.	5	12	15	6	8	22
14073	NM_010173,NR_151700,XR_001784089,XR_001784090,XR_001784091	Faah	fatty acid amide hydrolase	protein_coding	NP_034303.3	109609	.	6369	6314	7109	7016	6552	4614
14074	gene-Fabp3-ps1	Fabp3-ps1	fatty acid binding protein 3, muscle and heart, pseudogene 1	pseudogene	.	101929	.	102	86	89	88	106	80
14077	NM_010174	Fabp3	fatty acid binding protein 3, muscle and heart	protein_coding	NP_034304.1	95476	.	1527	1379	1697	1529	1583	1204
14079	NM_007980	Fabp2	fatty acid binding protein 2, intestinal	protein_coding	NP_032006.1	95478	.	0	0	0	0	0	0
14080	NM_017399	Fabp1	fatty acid binding protein 1, liver	protein_coding	NP_059095.1	95479	.	0	0	0	0	0	0
14081	NM_001302163,NM_007981,XM_006509262,XM_006509264,XM_006509265,XM_006509266,XM_017312563,XM_030243285	Acsl1	acyl-CoA synthetase long-chain family member 1	protein_coding	NP_001289092.1;NP_032007.2;XP_006509325.2;XP_006509327.1;XP_006509328.1;XP_006509329.1;XP_017168052.1;XP_030099145.1	102797	.	2643	2882	2668	2573	2308	2131
14082	NM_010175	Fadd	Fas (TNFRSF6)-associated via death domain	protein_coding	NP_034305.1	109324	.	78	147	94	73	69	96
14083	NM_001358045,NM_001358046,NM_007982,XM_006520415,XM_006520416,XM_006520418,XM_006520420,XM_006520421,XM_006520422,XM_006520424,XM_006520425,XM_006520427,XM_006520428,XM_006520429,XM_006520430,XM_006520431,XM_006520432,XM_006520434,XM_006520435,XM_011245452,XM_011245453,XM_030248319,XM_030248320,XM_030248322,XM_030248323,XM_030248324,XM_030248325,XM_030248326,XM_030248328,XM_030248329,XM_030248330…	Ptk2	PTK2 protein tyrosine kinase 2	protein_coding	NP_001344974.1;NP_001344975.1;NP_032008.2;XP_006520478.1;XP_006520479.1;XP_006520481.1;XP_006520483.1;XP_006520484.1;XP_006520485.1;XP_006520487.1;XP_006520488.1;XP_006520490.1;XP_006520491.1;XP_006520492.1;XP_006520493.1;XP_006520494.1;XP_006520495.1;XP_006520497.1;XP_006520498.1;XP_011243754.1;XP_011243755.1;XP_030104179.1;XP_030104180.1;XP_030104182.1;XP_030104183.1;XP_030104184.1;XP_030104185…	95481	.	4486	5134	4931	5049	4669	4388
14084	NM_007983	Faf1	Fas-associated factor 1	protein_coding	NP_032009.2	109419	.	1296	1394	1378	1372	1446	1165
14085	NM_010176	Fah	fumarylacetoacetate hydrolase	protein_coding	NP_034306.2	95482	.	564	658	605	629	562	517
14086	NM_007984	Fscn1	fascin actin-bundling protein 1	protein_coding	NP_032010.2	1352745	.	4395	5074	5680	5541	5000	5186
14087	NM_016925,XM_006530661,XM_006530662,XM_006530663,XM_006530664,XM_006530665,XM_006530666,XR_003947233,XR_387732	Fanca	Fanconi anemia, complementation group A	protein_coding	NP_058621.2;XP_006530724.1;XP_006530725.1;XP_006530726.1;XP_006530727.1;XP_006530728.1;XP_006530729.1	1341823	.	10	30	11	16	7	23
14088	NM_001042673,NM_001282942,NM_001347514,NM_001347515,NM_007985,XM_006517087,XM_006517090,XM_011244474,XM_011244475,XM_011244476,XM_011244477,XM_011244478,XM_011244480,XM_011244481,XM_011244482,XM_011244483,XM_011244484,XM_011244485,XM_011244487,XM_017315382,XM_030247144,XM_030247145,XM_030247146,XM_030247147,XM_030247148,XM_030247149,XR_001780750,XR_001780751,XR_003950426	Fancc	Fanconi anemia, complementation group C	protein_coding	NP_001036138.1;NP_001269871.1;NP_001334443.1;NP_001334444.1;NP_032011.2;XP_006517150.1;XP_006517153.1;XP_011242776.1;XP_011242777.1;XP_011242778.1;XP_011242779.1;XP_011242780.1;XP_011242782.1;XP_011242783.1;XP_011242784.1;XP_011242785.1;XP_011242786.1;XP_011242787.1;XP_011242789.1;XP_017170871.1;XP_030103004.1;XP_030103005.1;XP_030103006.1;XP_030103007.1;XP_030103008.1;XP_030103009.1	95480	.	187	242	218	222	208	154
14089	NM_007986,XM_006498746,XM_011239289,XM_017315507,XM_017315512	Fap	fibroblast activation protein	protein_coding	NP_032012.1;XP_006498809.1;XP_011237591.1;XP_017170996.1;XP_017171001.1	109608	.	80	18	9	13	15	11
14102	NM_001146708,NM_007987,XM_030250746,XM_030250747,XM_030250748,XM_030250749,XM_030250750,XM_030250751	Fas	Fas (TNF receptor superfamily member 6)	protein_coding	NP_001140180.1;NP_032013.2;XP_030106606.1;XP_030106607.1;XP_030106608.1;XP_030106609.1;XP_030106610.1;XP_030106611.1	95484	.	52	88	65	47	52	118
14103	NM_001205243,NM_010177	Fasl	Fas ligand (TNF superfamily, member 6)	protein_coding	NP_001192172.1;NP_034307.1	99255	.	0	0	0	3	0	4
14104	NM_007988,XM_030245556	Fasn	fatty acid synthase	protein_coding	NP_032014.3;XP_030101416.1	95485	.	13530	14191	16575	14534	12900	12241
14105	NM_001080387,NM_001284195,NM_001284196,NM_010178,XM_011250188	Srsf10	serine and arginine-rich splicing factor 10	protein_coding	NP_001073856.1;NP_001271124.1;NP_001271125.1;NP_034308.1;XP_011248490.1	1333805	.	2019	2218	2258	2115	2279	2271
14106	NM_007989,XM_006520436	Foxh1	forkhead box H1	protein_coding	NP_032015.1;XP_006520499.1	1347465	.	2	2	6	5	4	2
14107	NM_001081286,XM_006509267,XM_006509268,XM_006509270,XM_006509271,XM_006509272,XM_006509273,XM_006509274,XM_006509276,XM_006509277,XM_011242173,XM_017312564,XM_030243287,XM_030243288,XR_001778405	Fat1	FAT atypical cadherin 1	protein_coding	NP_001074755.2;XP_006509330.1;XP_006509331.1;XP_006509333.1;XP_006509334.1;XP_006509335.1;XP_006509336.1;XP_006509337.1;XP_006509339.1;XP_006509340.1;XP_011240475.1;XP_017168053.1;XP_030099147.1;XP_030099148.1	109168	.	1335	1962	1757	1502	1178	1669
14109	NM_001160239,NM_001190436,NM_007990	Fau	Finkel-Biskis-Reilly murine sarcoma virus (FBR-MuSV) ubiquitously expressed (fox derived)	protein_coding	NP_001153711.1;NP_001177365.1;NP_032016.1	102547	.	4693	5493	5138	5298	4839	5142
14113	NM_007991,XM_030242131	Fbl	fibrillarin	protein_coding	NP_032017.2;XP_030097991.1	95486	.	953	999	897	906	965	805
14114	NM_001347088,NM_010180	Fbln1	fibulin 1	protein_coding	NP_001334017.1;NP_034310.2	95487	.	432	517	274	344	316	584
14115	NM_001081437,NM_007992,XM_006505530,XM_030255156,XM_030255157	Fbln2	fibulin 2	protein_coding	NP_001074906.1;NP_032018.2;XP_006505593.1;XP_030111016.1;XP_030111017.1	95488	.	115	104	122	164	118	135
14118	NM_007993,XM_006498747,XM_011239290,XR_866221	Fbn1	fibrillin 1	protein_coding	NP_032019.2;XP_006498810.1;XP_011237592.1	95489	.	320	281	292	303	225	239
14119	NM_010181,XM_017317828,XM_030250333	Fbn2	fibrillin 2	protein_coding	NP_034311.2;XP_017173317.1;XP_030106193.1	95490	.	64	63	105	110	98	120
14120	NM_007994	Fbp2	fructose bisphosphatase 2	protein_coding	NP_032020.2	95491	.	0	0	0	0	0	0
14121	NM_019395,XM_011244488	Fbp1	fructose bisphosphatase 1	protein_coding	NP_062268.1;XP_011242790.1	95492	.	9	13	9	18	15	6
14123	NM_010183,XM_006507348	Fbrs	fibrosin	protein_coding	NP_034313.2;XP_006507411.1	104648	.	1671	1579	1813	1582	1494	1369
14125	NM_010184,XM_006496655	Fcer1a	Fc receptor, IgE, high affinity I, alpha polypeptide	protein_coding	NP_034314.2;XP_006496718.1	95494	.	0	0	0	0	0	0
14126	NM_001276328,NM_001276329,NM_001276330,NM_013516,XM_017318060	Ms4a2	membrane-spanning 4-domains, subfamily A, member 2	protein_coding	NP_001263257.1;NP_001263258.1;NP_001263259.1;NP_038544.1;XP_017173549.1	95495	.	0	0	0	0	0	0
14127	NM_010185	Fcer1g	Fc receptor, IgE, high affinity I, gamma polypeptide	protein_coding	NP_034315.1	95496	.	289	555	272	436	242	373
14128	NM_001253737,NM_001253739,NM_001253743,NM_001253745,NM_001253746,NM_001253747,NM_013517,XM_006508697	Fcer2a	Fc receptor, IgE, low affinity II, alpha polypeptide	protein_coding	NP_001240666.1;NP_001240668.1;NP_001240672.1;NP_001240674.1;NP_001240675.1;NP_001240676.1;NP_038545.1;XP_006508760.1	95497	.	0	0	0	0	0	0
14129	NM_010186	Fcgr1	Fc receptor, IgG, high affinity I	protein_coding	NP_034316.1	95498	.	92	243	115	179	110	195
14130	NM_001077189,NM_010187	Fcgr2b	Fc receptor, IgG, low affinity IIb	protein_coding	NP_001070657.1;NP_034317.1	95499	.	107	262	93	149	100	227
14131	NM_001356511,NM_010188,XM_006496658,XM_006496659,XM_006496660,XM_030247672,XM_030247708	Fcgr3	Fc receptor, IgG, low affinity III	protein_coding	NP_001343440.1;NP_034318.2;XP_006496721.1;XP_006496722.1;XP_006496723.1;XP_030103532.1;XP_030103568.1	95500	.	463	1024	601	833	498	770
14132	NM_001357117,NM_010189	Fcgrt	Fc receptor, IgG, alpha chain transporter	protein_coding	NP_001344046.1;NP_034319.2	103017	.	513	826	621	617	512	697
14133	NM_007995,XM_006497673,XM_006497675,XM_011239016	Fcna	ficolin A	protein_coding	NP_032021.1;XP_006497736.1;XP_006497738.1;XP_011237318.1	1340905	.	0	2	3	0	0	4
14134	NM_010190,XM_006497676	Fcnb	ficolin B	protein_coding	NP_034320.1;XP_006497739.1	1341158	.	0	0	0	0	0	0
14137	NM_001360211,NM_010191,XM_006518547,XM_017315844	Fdft1	farnesyl diphosphate farnesyl transferase 1	protein_coding	NP_001347140.1;NP_034321.2;XP_006518610.1;XP_017171333.1	102706	.	3256	3506	3481	4021	3835	3204
14148	NM_001301728,NM_007996	Fdx1	ferredoxin 1	protein_coding	NP_001288657.1;NP_032022.1	103224	.	187	265	212	222	228	252
14149	NM_007997,XM_006532186,XM_017314257,XR_001779876	Fdxr	ferredoxin reductase	protein_coding	NP_032023.1;XP_006532249.1;XP_017169746.1	104724	.	277	376	309	323	223	249
14151	NM_001348055,NM_007998,XR_385974	Fech	ferrochelatase	protein_coding	NP_001334984.1;NP_032024.2	95513	.	2692	3079	2810	2838	2582	2181
14154	NM_010192	Fem1a	fem 1 homolog a	protein_coding	NP_034322.3	1335089	.	2953	3182	3346	3244	2892	2581
14155	NM_010193	Fem1b	fem 1 homolog b	protein_coding	NP_034323.1	1335087	.	7708	7721	7581	7788	7614	7486
14156	NM_001271614,NM_001271615,NM_007999,XM_006526661,XM_006526663,XM_006526664	Fen1	flap structure specific endonuclease 1	protein_coding	NP_001258543.1;NP_001258544.1;NP_032025.2;XP_006526724.1;XP_006526726.1;XP_006526727.1	102779	.	490	603	523	542	476	502
14158	NM_001037997,NM_001286415,NM_008000,XM_006523640,XM_006523641,XM_006523643,XM_006523645,XM_006523647,XM_006523650,XM_011246293,XM_017317242,XM_017317243,XM_017317244,XM_030249496,XR_003952084,XR_003952085,XR_003952086,XR_003952087,XR_385280,XR_385281	Fer	fer (fms/fps related) protein kinase	protein_coding	NP_001033086.2;NP_001273344.1;NP_032026.2;XP_006523703.1;XP_006523704.1;XP_006523706.1;XP_006523708.1;XP_006523710.1;XP_006523713.1;XP_011244595.1;XP_017172731.1;XP_017172732.1;XP_017172733.1;XP_030105356.1	105917	.	1476	1398	1454	1458	1374	1372
14159	NM_010194,XM_006540604,XR_003946388	Fes	feline sarcoma oncogene	protein_coding	NP_034324.2;XP_006540667.1	95514	.	71	104	76	77	83	117
14160	NM_010195	Lgr5	leucine rich repeat containing G protein coupled receptor 5	protein_coding	NP_034325.2	1341817	.	56	50	51	37	82	98
14161	NM_001111048,NM_010196	Fga	fibrinogen alpha chain	protein_coding	NP_001104518.1;NP_034326.1	1316726	.	5	1	3	0	0	0
14163	NM_008001,XM_006528699	Fgd1	FYVE, RhoGEF and PH domain containing 1	protein_coding	NP_032027.2;XP_006528762.1	104566	.	645	633	583	638	647	578
14164	NM_010197,XM_006525641,XM_006525642,XM_006525644,XM_006525645,XM_006525647,XM_006525648,XM_006525649,XM_011246841,XM_011246842,XM_011246843,XM_017317830,XM_017317831,XM_017317832	Fgf1	fibroblast growth factor 1	protein_coding	NP_034327.1;XP_006525704.1;XP_006525705.1;XP_006525707.1;XP_006525708.1;XP_006525710.1;XP_006525711.1;XP_006525712.1;XP_011245143.1;XP_011245144.1;XP_011245145.1;XP_017173319.1;XP_017173320.1;XP_017173321.1	95515	.	2329	3290	2629	2699	2316	3078
14165	NM_008002	Fgf10	fibroblast growth factor 10	protein_coding	NP_032028.1	1099809	.	767	622	722	630	727	601
14166	NM_001291104,NM_001362623,NM_001362624,NM_010198,XM_006532188,XM_011248721,XM_011248722	Fgf11	fibroblast growth factor 11	protein_coding	NP_001278033.1;NP_001349552.1;NP_001349553.1;NP_034328.1;XP_006532251.1;XP_011247023.1;XP_011247024.1	109167	.	863	737	1039	1018	1312	1568
14167	NM_001276419,NM_001276420,NM_001357064,NM_010199,NM_183064	Fgf12	fibroblast growth factor 12	protein_coding	NP_001263348.1;NP_001263349.1;NP_001343993.1;NP_034329.1;NP_898887.1	109183	.	4155	3366	4004	3805	4160	3536
14168	NM_001290414,NM_001290415,NM_001356335,NM_010200,XM_006527793,XM_006527795,XM_006527796,XM_006527797,XM_006527799	Fgf13	fibroblast growth factor 13	protein_coding	NP_001277343.1;NP_001277344.1;NP_001343264.1;NP_034330.2;XP_006527856.1;XP_006527858.1;XP_006527859.1;XP_006527860.1;XP_006527862.1	109178	.	10075	10356	10953	10608	9439	7364
14169	NM_010201,NM_207667,XM_006518549,XM_011244952,XM_017315845	Fgf14	fibroblast growth factor 14	protein_coding	NP_034331.2;NP_997550.1;XP_006518612.1;XP_011243254.1;XP_017171334.1	109189	.	1795	1597	1609	1738	1525	1476
14170	NM_008003	Fgf15	fibroblast growth factor 15	protein_coding	NP_032029.1	1096383	.	0	0	0	0	0	0
14171	NM_001360108,NM_008004	Fgf17	fibroblast growth factor 17	protein_coding	NP_001347037.1;NP_032030.1	1202401	.	0	3	0	0	0	6
14172	NM_008005,NR_102395	Fgf18	fibroblast growth factor 18	protein_coding	NP_032031.1	1277980	.	90	78	70	63	86	40
14173	NM_008006,XM_006535399	Fgf2	fibroblast growth factor 2	protein_coding	NP_032032.1;XP_006535462.1	95516	.	547	454	508	455	439	443
14174	NM_008007	Fgf3	fibroblast growth factor 3	protein_coding	NP_032033.2	95517	.	0	0	0	0	0	0
14175	NM_010202	Fgf4	fibroblast growth factor 4	protein_coding	NP_034332.2	95518	.	0	0	0	0	0	0
14176	NM_001277268,NM_010203	Fgf5	fibroblast growth factor 5	protein_coding	NP_001264197.1;NP_034333.1	95519	.	172	176	200	173	173	97
14177	NM_010204	Fgf6	fibroblast growth factor 6	protein_coding	NP_034334.1	95520	.	0	0	0	0	0	0
14178	NM_008008	Fgf7	fibroblast growth factor 7	protein_coding	NP_032034.1	95521	.	26	35	47	32	24	40
14179	NM_001166361,NM_001166362,NM_001166363,NM_001379139,NM_001379140,NM_010205,XM_006526668	Fgf8	fibroblast growth factor 8	protein_coding	NP_001159833.1;NP_001159834.1;NP_001159835.1;NP_001366068.1;NP_001366069.1;NP_034335.1;XP_006526731.1	99604	.	0	3	0	0	0	3
14180	NM_013518,XM_006518554,XM_030247647,XM_030247648	Fgf9	fibroblast growth factor 9	protein_coding	NP_038546.2;XP_006518617.1;XP_030103507.1;XP_030103508.1	104723	.	534	456	612	476	633	515
14181	NM_001271616,NM_008009,XM_006503711,XM_006503712,XM_030254129	Fgfbp1	fibroblast growth factor binding protein 1	protein_coding	NP_001258545.1;NP_032035.2;XP_006503774.1;XP_006503775.1;XP_030109989.1	1096350	.	13	16	7	8	0	8
14182	NM_001079908,NM_001079909,NM_010206	Fgfr1	fibroblast growth factor receptor 1	protein_coding	NP_001073377.1;NP_001073378.1;NP_034336.2	95522	.	6533	7890	6588	6915	6108	5725
14183	NM_001347638,NM_010207,NM_201601	Fgfr2	fibroblast growth factor receptor 2	protein_coding	NP_001334567.1;NP_034337.2;NP_963895.2	95523	.	2687	4339	2970	2774	2038	3100
14184	NM_001163215,NM_001163216,NM_001163217,NM_001205270,NM_001359036,NM_001359037,NM_008010	Fgfr3	fibroblast growth factor receptor 3	protein_coding	NP_001156687.1;NP_001156688.1;NP_001156689.1;NP_001192199.1;NP_001345965.1;NP_001345966.1;NP_032036.2	95524	.	3114	3525	3547	3620	3528	3702
14186	NM_008011,XM_006517099,XM_006517100	Fgfr4	fibroblast growth factor receptor 4	protein_coding	NP_032037.2;XP_006517162.3;XP_006517163.1	95525	.	5	6	4	6	5	9
14187	NM_008012	Akr1b8	aldo-keto reductase family 1, member B8	protein_coding	NP_032038.1	107673	.	19	51	19	35	41	43
14190	NM_008013	Fgl2	fibrinogen-like protein 2	protein_coding	NP_032039.2	103266	.	88	162	83	117	110	181
14191	NM_010208,XM_006538544,XM_006538545	Fgr	FGR proto-oncogene, Src family tyrosine kinase	protein_coding	NP_034338.3;XP_006538607.1;XP_006538608.1	95527	.	6	12	6	0	0	10
14194	NM_010209	Fh1	fumarate hydratase 1	protein_coding	NP_034339.2	95530	.	2690	2838	2722	2909	2768	2377
14198	NM_001308285,NM_001308286,NM_001360141,NM_010210,XM_006517924,XM_011244732,XM_030247649	Fhit	fragile histidine triad gene	protein_coding	NP_001295214.1;NP_001295215.1;NP_001347070.1;NP_034340.1;XP_006517987.1;XP_011243034.1;XP_030103509.1	1277947	.	88	108	102	124	102	102
14199	NM_001077361,NM_001077362,NM_001287800,NM_010211,XM_006527800,XM_006527801,XM_006527802,XM_006527803,XM_006527804,XM_006527805,XM_006527807,XM_006527808,XM_006527809,XM_017318381,XM_017318382,XM_030251223,XM_030251224,XM_030251225	Fhl1	four and a half LIM domains 1	protein_coding	NP_001070829.1;NP_001070830.1;NP_001274729.1;NP_034341.2;XP_006527863.2;XP_006527864.1;XP_006527865.1;XP_006527866.1;XP_006527867.1;XP_006527868.1;XP_006527870.2;XP_006527871.2;XP_006527872.1;XP_017173870.1;XP_017173871.1;XP_030107083.1;XP_030107084.1;XP_030107085.1	1298387	.	2112	2974	2249	2180	2215	2368
14200	NM_001289533,NM_010212,XM_011238434	Fhl2	four and a half LIM domains 2	protein_coding	NP_001276462.1;NP_034342.1;XP_011236736.1	1338762	.	1196	958	1324	1247	1108	861
14201	NM_010213,XM_006502766,XM_006502768,XM_006502769,XR_003954878	Fhl3	four and a half LIM domains 3	protein_coding	NP_034343.2;XP_006502829.1;XP_006502831.1;XP_006502832.1	1341092	.	21	29	39	65	28	36
14202	NM_010214	Fhl4	four and a half LIM domains 4	protein_coding	NP_034344.2	1338765	.	35	29	28	34	32	32
14204	NM_010215	Il4i1	interleukin 4 induced 1	protein_coding	NP_034345.2	109552	.	0	0	10	0	0	17
14205	NM_001308489,NM_010216	Vegfd	vascular endothelial growth factor D	protein_coding	NP_001295418.1;NP_034346.1	108037	.	36	33	24	41	52	124
14208	NM_008014	Ppm1g	protein phosphatase 1G (formerly 2C), magnesium-dependent, gamma isoform	protein_coding	NP_032040.1	106065	.	2847	2871	2964	3140	2800	2612
14211	NM_001301412,NM_008017	Smc2	structural maintenance of chromosomes 2	protein_coding	NP_001288341.1;NP_032043.3	106067	.	486	573	494	608	500	585
14218	NM_001164717,NM_008018,XM_006526669,XM_006526670	Sh3pxd2a	SH3 and PX domains 2A	protein_coding	NP_001158189.1;NP_032044.2;XP_006526732.1;XP_006526733.1	1298393	.	2348	2499	2805	2647	2327	2053
14219	NM_010217	Ccn2	cellular communication network factor 2	protein_coding	NP_034347.2	95537	.	140	209	141	137	119	180
14221	NM_010218	Fjx1	four jointed box 1	protein_coding	NP_034348.2	1341907	.	1210	1670	1658	1524	1438	1467
14223	gene-Fkbp1a-ps2	Fkbp1a-ps2	FK506 binding protein 1a, pseudogene 2	pseudogene	.	107772	.	0	0	1	0	1	0
14225	NM_001302077,NM_001302078,NM_001302079,NM_001302080,NM_001355077,NM_001355078,NM_008019,NR_126058,XM_011239292,XM_017315525	Fkbp1a	FK506 binding protein 1a	protein_coding	NP_001289006.1;NP_001289007.1;NP_001289008.1;NP_001289009.1;NP_001342006.1;NP_001342007.1;NP_032045.1;XP_011237594.2;XP_017171014.2	95541	.	24695	23810	25864	26438	27297	24505
14226	NM_001378816,NM_001378817,NM_001378818,NM_016863,NR_166125	Fkbp1b	FK506 binding protein 1b	protein_coding	NP_001365745.1;NP_001365746.1;NP_001365747.1;NP_058559.3	1336205	.	836	706	1050	966	1032	914
14227	NM_001166368,NM_001360286,NM_001360288,NM_008020	Fkbp2	FK506 binding protein 2	protein_coding	NP_001159840.1;NP_001347215.1;NP_001347217.1;NP_032046.1	95542	.	1112	1138	1107	1085	1246	970
14228	NM_010219	Fkbp4	FK506 binding protein 4	protein_coding	NP_034349.1	95543	.	3634	4313	4156	4295	3923	3569
14229	NM_010220	Fkbp5	FK506 binding protein 5	protein_coding	NP_034350.1	104670	.	3245	3636	3473	3700	3663	2951
14230	NM_001163481,NM_010221	Fkbp10	FK506 binding protein 10	protein_coding	NP_001156953.1;NP_034351.2	104769	.	285	431	300	374	304	371
14231	NM_001355079,NM_001355080,NM_010222	Fkbp7	FK506 binding protein 7	protein_coding	NP_001342008.1;NP_001342009.1;NP_034352.1	1336879	.	81	105	106	95	102	66
14232	NM_001111066,NM_001199631,NM_010223,XM_006509556,XM_017312567,XM_017312568,XR_001778406,XR_003947234,XR_379034	Fkbp8	FK506 binding protein 8	protein_coding	NP_001104536.1;NP_001186560.1;NP_034353.2;XP_006509619.1;XP_017168056.1;XP_017168057.1	1341070	.	10788	11402	12668	11964	11656	9206
14233	NM_023907	Foxi1	forkhead box I1	protein_coding	NP_076396.3	1096329	.	0	0	0	0	0	0
14234	NM_013519	Foxc2	forkhead box C2	protein_coding	NP_038547.2	1347481	.	10	8	4	8	2	4
14235	NM_008021	Foxm1	forkhead box M1	protein_coding	NP_032047.4	1347487	.	60	70	52	77	51	44
14236	NM_001355742,NM_001355743,NM_180974,XM_006523652,XM_006523653,XM_006523654,XM_030249497,XM_030249498	Foxn2	forkhead box N2	protein_coding	NP_001342671.1;NP_001342672.1;NP_851305.2;XP_006523715.1;XP_006523716.1;XP_006523717.1;XP_030105357.1;XP_030105358.1	1347478	.	960	1079	940	979	888	816
14237	NM_008022	Foxd4	forkhead box D4	protein_coding	NP_032048.1	1347467	.	0	0	0	0	0	0
14238	NM_010225	Foxf2	forkhead box F2	protein_coding	NP_034355.2	1347479	.	90	108	109	117	101	140
14239	NM_010226	Foxs1	forkhead box S1	protein_coding	NP_034356.1	95546	.	6	4	6	12	4	8
14240	NM_008023	Foxb2	forkhead box B2	protein_coding	NP_032049.1	1347468	.	0	1	0	0	0	0
14241	NM_008024	Foxl1	forkhead box L1	protein_coding	NP_032050.2	1347469	.	0	0	0	0	0	0
14245	NM_001130412,NM_001355598,NM_015763,NM_172950,XM_006514975,XM_006514976,XM_006514977,XM_006514978,XM_006514982,XM_006514983,XM_006514984,XM_006514986,XM_006514987,XM_011243815,XM_030246557,XM_030246558,XM_030246559,XM_030246560	Lpin1	lipin 1	protein_coding	NP_001123884.1;NP_001342527.1;NP_056578.2;NP_766538.2;XP_006515038.1;XP_006515039.1;XP_006515040.1;XP_006515041.1;XP_006515045.1;XP_006515046.1;XP_006515047.1;XP_006515049.1;XP_006515050.1;XP_011242117.1;XP_030102417.1;XP_030102418.1;XP_030102419.1;XP_030102420.1	1891340	.	1103	1302	1246	1138	1117	1115
14246	XM_017319842	Flg	filaggrin	protein_coding	XP_017175331.1	95553	.	0	0	0	0	0	0
14247	NM_008026,XM_006510008,XM_006510009,XM_017313133	Fli1	Friend leukemia integration 1	protein_coding	NP_032052.1;XP_006510071.1;XP_006510072.1;XP_017168622.1	95554	.	144	205	145	174	134	169
14248	NM_001302207,NM_022009	Flii	flightless I actin binding protein	protein_coding	NP_001289136.1;NP_071292.1	1342286	.	1744	2089	1852	1753	1752	1705
14251	NM_008027,XM_006523656,XM_006523657	Flot1	flotillin 1	protein_coding	NP_032053.1;XP_006523719.1;XP_006523720.1	1100500	.	2948	3326	3349	3494	3415	2810
14252	NM_001040403,NM_001284227,NM_001284228,NM_001362625,NM_001362626,NM_001362627,NM_008028,XM_030245557,XM_030245558	Flot2	flotillin 2	protein_coding	NP_001035493.1;NP_001271156.1;NP_001271157.1;NP_001349554.1;NP_001349555.1;NP_001349556.1;NP_032054.1;XP_030101417.1;XP_030101418.1	103309	.	3766	4049	4372	4320	4195	3302
14254	NM_001363135,NM_010228,XM_006504801,XM_006504802,XM_006504803,XM_011241000	Flt1	FMS-like tyrosine kinase 1	protein_coding	NP_001350064.1;NP_034358.2;XP_006504864.1;XP_006504865.1;XP_006504866.1;XP_011239302.1	95558	.	2297	2901	2616	2636	1955	2624
14255	NM_010229,XM_006504804,XM_006504805,XM_030254130	Flt3	FMS-like tyrosine kinase 3	protein_coding	NP_034359.2;XP_006504867.1;XP_006504868.1;XP_030109990.1	95559	.	239	222	264	228	230	161
14256	NM_013520,NR_102725,XM_006540606,XM_006540607,XM_006540608,XM_006540609,XM_006540610,XM_006540612,XM_011250793,XM_011250794,XM_030242133,XR_003946389,XR_882010,XR_882011,XR_882012,XR_882013,XR_882014,XR_882015,XR_882016,XR_882017,XR_882018	Flt3l	FMS-like tyrosine kinase 3 ligand	protein_coding	NP_038548.3;XP_006540669.1;XP_006540670.1;XP_006540671.1;XP_006540672.1;XP_006540673.1;XP_006540675.1;XP_011249095.1;XP_011249096.1;XP_030097993.1	95560	.	37	34	18	21	21	31
14257	NM_008029	Flt4	FMS-like tyrosine kinase 4	protein_coding	NP_032055.1	95561	.	116	143	134	130	99	115
14260	NM_001285458,NM_001285459,NM_001287817,NM_001287818,NM_010230,XM_006498750,XM_011239294,XM_011239295,XM_011239298,XM_017315533	Fmn1	formin 1	protein_coding	NP_001272387.1;NP_001272388.1;NP_001274746.1;NP_001274747.1;NP_034360.2;XP_006498813.1;XP_011237596.1;XP_011237597.1;XP_011237600.1;XP_017171022.1	101815	.	793	686	903	857	740	718
14261	NM_001330291,NM_001330318,NM_010231,XM_006496663,XM_030247879	Fmo1	flavin containing monooxygenase 1	protein_coding	NP_001317220.1;NP_001317247.1;NP_034361.1;XP_006496726.1;XP_030103739.1	1310002	.	206	216	226	154	174	170
14262	NM_008030	Fmo3	flavin containing monooxygenase 3	protein_coding	NP_032056.1	1100496	.	0	0	0	0	0	0
14263	NM_001161763,NM_001161765,NM_001355119,NM_010232,XM_006500995,XM_006500996,XM_011240013,XM_030252418,XM_030252419,XM_030252420	Fmo5	flavin containing monooxygenase 5	protein_coding	NP_001155235.1;NP_001155237.1;NP_001342048.1;NP_034362.2;XP_006501058.1;XP_006501059.1;XP_011238315.1;XP_030108278.1;XP_030108279.1;XP_030108280.1	1310004	.	148	298	156	228	124	212
14264	NM_021355	Fmod	fibromodulin	protein_coding	NP_067330.1	1328364	.	134	145	124	141	119	182
14265	NM_001290424,NM_001374719,NM_008031,XM_006527810,XM_006527813,XM_006527814,XR_001782738	Fmr1	FMRP translational regulator 1	protein_coding	NP_001277353.1;NP_001361648.1;NP_032057.2;XP_006527873.1;XP_006527876.1;XP_006527877.1	95564	.	2388	2388	2396	2249	2154	2172
14266	NM_008032,XM_006527816,XM_006527817,XM_006527818,XM_006527819,XM_006527820,XM_006527821,XM_030251226	Aff2	AF4/FMR2 family, member 2	protein_coding	NP_032058.2;XP_006527879.1;XP_006527880.1;XP_006527881.1;XP_006527882.1;XP_006527883.1;XP_006527884.1;XP_030107086.1	1202294	.	1065	1047	1080	1078	962	923
14268	NM_001276408,NM_001276409,NM_001276410,NM_001276411,NM_001276412,NM_001276413,NM_010233,XM_006495697,XM_006495699,XM_006495700,XM_017315775,XM_017315837,XM_017315848,XM_030248098,XM_030248135	Fn1	fibronectin 1	protein_coding	NP_001263337.1;NP_001263338.1;NP_001263339.1;NP_001263340.1;NP_001263341.1;NP_001263342.1;NP_034363.1;XP_006495760.1;XP_006495762.1;XP_006495763.1;XP_017171264.1;XP_017171326.1;XP_017171337.1;XP_030103958.1;XP_030103995.1	95566	.	1449	1866	1778	1676	1330	1631
14269	NM_001038700,NM_001177648,NM_001177649,NM_001177650,NM_001355105,NM_001355106,NM_019406,XM_006497684,XM_006497685,XM_006497686,XM_006497687,XM_006497688,XM_006497689,XM_006497690,XM_006497691,XM_006497692,XM_006497693,XM_006497694,XM_006497695,XM_017315551,XM_030247489,XM_030247490,XM_030247491,XM_030247492,XR_374060	Fnbp1	formin binding protein 1	protein_coding	NP_001033789.1;NP_001171119.1;NP_001171120.1;NP_001171121.1;NP_001342034.1;NP_001342035.1;NP_062279.1;XP_006497747.1;XP_006497748.1;XP_006497749.1;XP_006497750.1;XP_006497751.1;XP_006497752.1;XP_006497753.1;XP_006497754.1;XP_006497755.1;XP_006497756.1;XP_006497757.1;XP_006497758.1;XP_017171040.1;XP_030103349.1;XP_030103350.1;XP_030103351.1;XP_030103352.1	109606	.	5589	8681	6600	6331	4632	5946
14270	NM_001081011,XM_011247923,XR_001781100,XR_001781103	Srgap2	SLIT-ROBO Rho GTPase activating protein 2	protein_coding	NP_001074480.2;XP_011246225.1	109605	.	3442	3611	3589	3369	3217	2973
14272	NM_008033	Fnta	farnesyltransferase, CAAX box, alpha	protein_coding	NP_032059.1	104683	.	1551	1960	1617	1721	1630	1908
14275	NM_001252552,NM_001252553,NM_001252554,NM_008034,XM_006507360,XM_006507361,XM_006507363,XM_006507364,XM_006507365,XM_006507366,XM_006507367,XM_006507368,XM_006507369,XM_006507370	Folr1	folate receptor 1 (adult)	protein_coding	NP_001239481.1;NP_001239482.1;NP_001239483.1;NP_032060.2;XP_006507423.1;XP_006507424.1;XP_006507426.1;XP_006507427.1;XP_006507428.1;XP_006507429.1;XP_006507430.1;XP_006507431.1;XP_006507432.1;XP_006507433.1	95568	.	839	145	78	59	85	92
14276	NM_001303231,NM_001303239,NM_008035	Folr2	folate receptor 2 (fetal)	protein_coding	NP_001290160.1;NP_001290168.1;NP_032061.1	95569	.	9	0	0	0	3	6
14281	NM_010234	Fos	FBJ osteosarcoma oncogene	protein_coding	NP_034364.1	95574	.	1163	1235	1150	1109	921	795
14282	NM_001347586,NM_008036,XM_006539543	Fosb	FBJ osteosarcoma oncogene B	protein_coding	NP_001334515.1;NP_032062.1;XP_006539606.1	95575	.	731	919	719	963	662	615
14283	NM_010235	Fosl1	fos-like antigen 1	protein_coding	NP_034365.1	107179	.	0	1	2	1	3	1
14284	NM_008037	Fosl2	fos-like antigen 2	protein_coding	NP_032063.2	102858	.	2112	2395	2236	2493	2565	2839
14287	NM_010236,XM_006497696,XM_006497697,XM_006497698,XM_011239021,XM_030247501,XM_030247502,XM_030247503,XR_001780795	Fpgs	folylpolyglutamyl synthetase	protein_coding	NP_034366.2;XP_006497759.2;XP_006497760.1;XP_006497761.4;XP_011237323.1;XP_030103361.1;XP_030103362.1;XP_030103363.1	95576	.	160	243	190	170	136	164
14289	NM_008039	Fpr2	formyl peptide receptor 2	protein_coding	NP_032065.1	1278319	.	0	0	0	0	0	0
14290	NM_008040	Fpr-rs3	formyl peptide receptor, related sequence 3	protein_coding	NP_032066.2	1278318	.	0	0	0	0	0	0
14291	NM_008041	Fpr-rs4	formyl peptide receptor, related sequence 4	protein_coding	NP_032067.2	1278317	.	0	0	0	0	0	0
14293	NM_013521	Fpr1	formyl peptide receptor 1	protein_coding	NP_038549.1	107443	.	2	0	0	0	0	0
14294	NM_008042	Fpr3	formyl peptide receptor 3	protein_coding	NP_032068.2	1194495	.	0	0	0	0	0	0
14296	NM_008043	Frat1	frequently rearranged in advanced T cell lymphomas	protein_coding	NP_032069.2	109450	.	531	502	522	510	440	390
14297	NM_008044,NR_157400	Fxn	frataxin	protein_coding	NP_032070.1	1096879	.	180	179	175	165	173	160
14299	NM_019681,XR_866007,XR_866008	Ncs1	neuronal calcium sensor 1	protein_coding	NP_062655.1	109166	.	15627	14373	17086	16962	17466	14054
14300	NM_013522,XM_017312570	Frg1	FSHD region gene 1	protein_coding	NP_038550.2;XP_017168059.1	893597	.	672	749	645	687	640	712
14302	NM_001159544,NM_001358769,NM_010237,XM_006512534,XM_006512536	Frk	fyn-related kinase	protein_coding	NP_001153016.1;NP_001345698.1;NP_034367.2;XP_006512597.1;XP_006512599.1	103265	.	22	7	13	10	10	4
14308	NM_008045	Fshb	follicle stimulating hormone beta	protein_coding	NP_032071.1	95582	.	0	0	0	0	0	0
14309	NM_013523	Fshr	follicle stimulating hormone receptor	protein_coding	NP_038551.3	95583	.	0	5	0	0	0	0
14311	NM_001301295,NM_001372264,NM_178373	Cidec	cell death-inducing DFFA-like effector c	protein_coding	NP_001288224.1;NP_001359193.1;NP_848460.1	95585	.	0	0	0	0	0	0
14312	NM_001204973,NM_010238,NR_037970,XM_017317255,XM_030249499,XM_030249500,XM_030249501,XR_003952088	Brd2	bromodomain containing 2	protein_coding	NP_001191902.1;NP_034368.2;XP_017172744.1;XP_030105359.1;XP_030105360.1;XP_030105361.1	99495	.	7724	8269	8531	8153	7722	7498
14313	NM_001301373,NM_001301375,NM_008046,XM_030247150	Fst	follistatin	protein_coding	NP_001288302.1;NP_001288304.1;NP_032072.1;XP_030103010.1	95586	.	101	98	99	79	89	69
14314	NM_008047	Fstl1	follistatin-like 1	protein_coding	NP_032073.2	102793	.	1289	1730	1193	1430	1386	1449
14317	NM_080845,XM_006513215,XM_006513216	Ftcd	formiminotransferase cyclodeaminase	protein_coding	NP_543121.1;XP_006513278.1;XP_006513279.1	1339962	.	0	0	0	0	0	0
14319	NM_010239,NR_073181	Fth1	ferritin heavy polypeptide 1	protein_coding	NP_034369.1	95588	.	72662	101659	89285	88969	74506	81304
14325	NM_010240	Ftl1	ferritin light polypeptide 1	protein_coding	NP_034370.2	95589	.	8282	10977	9259	9551	8350	9843
14337	gene-Ftl2-ps	Ftl2-ps	ferritin light polypeptide 2, pseudogene	pseudogene	.	95590	.	149	191	146	181	145	165
14339	NM_001302266,NM_001302267,NM_001302268,NM_001302337,NM_001358934,NM_001358935,NM_001358936,NM_001358937,NM_001358938,NM_010241,XM_006530673,XM_011248303,XM_011248304,XM_011248306,XM_011248307,XM_017312571,XM_017312574,XM_030243289,XM_030243290,XM_030243291,XM_030243292,XM_030243293,XM_030243294,XM_030243295,XM_030243296,XM_030243297	Aktip	thymoma viral proto-oncogene 1 interacting protein	protein_coding	NP_001289195.1;NP_001289196.1;NP_001289197.1;NP_001289266.1;NP_001345863.1;NP_001345864.1;NP_001345865.1;NP_001345866.1;NP_001345867.1;NP_034371.1;XP_006530736.1;XP_011246605.1;XP_011246606.1;XP_011246608.1;XP_011246609.1;XP_017168060.1;XP_017168063.1;XP_030099149.1;XP_030099150.1;XP_030099151.1;XP_030099152.1;XP_030099153.1;XP_030099154.1;XP_030099155.1;XP_030099156.1;XP_030099157.1	3693832	.	3539	4056	3751	3614	3627	4110
14343	NM_001271981,NM_008051	Fut1	fucosyltransferase 1	protein_coding	NP_001258910.1;NP_032077.2	109375	.	0	0	0	0	0	4
14344	NM_001271993,NM_018876,XM_011250795	Fut2	fucosyltransferase 2	protein_coding	NP_001258922.1;NP_061364.2;XP_011249097.1	109374	.	4	4	0	5	4	0
14345	NM_010242	Fut4	fucosyltransferase 4	protein_coding	NP_034372.1	95594	.	4	15	10	14	11	9
14346	NR_033644	Fut4-ps1	fucosyltransferase 4, pseudogene 1	transcribed_pseudogene	.	104647	.	0	0	0	0	0	0
14347	NM_001177366,NM_001177367,NM_001289453,NM_001289454,NM_001289455,NM_001289456,NM_013524,XM_006497702,XM_006497704,XM_011239022,XM_030247513,XM_030247514	Fut7	fucosyltransferase 7	protein_coding	NP_001170837.1;NP_001170838.1;NP_001276382.1;NP_001276383.1;NP_001276384.1;NP_001276385.1;NP_038552.1;XP_006497765.1;XP_006497767.1;XP_011237324.1;XP_030103373.1;XP_030103374.1	107692	.	4	7	7	10	6	9
14348	NM_010243	Fut9	fucosyltransferase 9	protein_coding	NP_034373.1	1330859	.	2325	2272	2177	2111	2133	2043
14349	NM_010244	Fv1	Friend virus susceptibility 1	protein_coding	NP_034374.2	95595	.	122	126	150	138	158	105
14356	NM_001360052,NM_001360053,NM_001360054,NM_001360055,NM_001360056,NM_001360058,NM_001360059,NM_001360060,NM_001360061,NM_019502,NR_153392,NR_153393	Timm10b	translocase of inner mitochondrial membrane 10B	protein_coding	NP_001346981.1;NP_001346982.1;NP_001346983.1;NP_001346984.1;NP_001346985.1;NP_001346987.1;NP_001346988.1;NP_001346989.1;NP_001346990.1;NP_062375.1	1315196	.	428	497	502	576	493	452
14357	NM_008052,XM_011248180,XM_011248181,XM_030254131	Dtx1	deltex 1, E3 ubiquitin ligase	protein_coding	NP_032078.2;XP_011246482.1;XP_011246483.1;XP_030109991.1	1352744	.	2100	2257	2694	2581	2416	2237
14359	NM_001113188,NM_001113189,NM_008053,XM_006535400,XM_006535401,XM_006535402	Fxr1	fragile X mental retardation gene 1, autosomal homolog	protein_coding	NP_001106659.1;NP_001106660.1;NP_032079.1;XP_006535463.1;XP_006535464.1;XP_006535465.1	104860	.	2461	2927	2432	2693	2667	2767
14360	NM_001122892,NM_001122893,NM_008054,XM_006512539,XM_006512540,XM_011243117,XM_030244881	Fyn	Fyn proto-oncogene	protein_coding	NP_001116364.1;NP_001116365.1;NP_032080.2;XP_006512602.1;XP_006512603.1;XP_011241419.1;XP_030100741.1	95602	.	5480	6325	5886	6132	5556	5104
14362	NM_021457	Fzd1	frizzled class receptor 1	protein_coding	NP_067432.2	1196625	.	312	433	331	390	402	427
14365	NM_021458	Fzd3	frizzled class receptor 3	protein_coding	NP_067433.1	108476	.	3618	3851	3638	3695	3389	4211
14366	NM_008055	Fzd4	frizzled class receptor 4	protein_coding	NP_032081.3	108520	.	513	450	386	395	321	401
14367	NM_001042659,NM_022721	Fzd5	frizzled class receptor 5	protein_coding	NP_001036124.1;NP_073558.2	108571	.	60	79	48	74	38	67
14368	NM_001162494,NM_008056,XM_006520438,XM_011245454,XM_011245455,XM_017316430	Fzd6	frizzled class receptor 6	protein_coding	NP_001155966.1;NP_032082.3;XP_006520501.1;XP_011243756.1;XP_011243757.1;XP_017171919.1	108474	.	307	442	333	393	264	338
14369	NM_008057	Fzd7	frizzled class receptor 7	protein_coding	NP_032083.3	108570	.	638	618	498	532	460	539
14370	NM_008058	Fzd8	frizzled class receptor 8	protein_coding	NP_032084.2	108460	.	155	158	173	157	96	134
14371	NM_010246	Fzd9	frizzled class receptor 9	protein_coding	NP_034376.1	1313278	.	127	334	162	242	155	253
14373	NM_008059	G0s2	G0/G1 switch gene 2	protein_coding	NP_032085.1	1316737	.	87	169	135	164	110	122
14375	NM_010247,XM_006520442,XM_006520443,XM_006520444,XM_006520445,XM_011245456,XR_383982	Xrcc6	X-ray repair complementing defective repair in Chinese hamster cells 6	protein_coding	NP_034377.2;XP_006520505.1;XP_006520506.1;XP_006520507.1;XP_006520508.1;XP_011243758.1	95606	.	615	644	549	633	507	532
14376	NM_001293621,NM_008060,XM_006526677,XM_006526678	Ganab	alpha glucosidase 2 alpha neutral subunit	protein_coding	NP_001280550.1;NP_032086.1;XP_006526740.1;XP_006526741.1	1097667	.	5266	5511	5480	5322	5255	5088
14377	NM_008061	G6pc	glucose-6-phosphatase, catalytic	protein_coding	NP_032087.2	95607	.	0	2	0	0	2	4
14378	NM_001289856,NM_001289857,NM_021331	G6pc2	glucose-6-phosphatase, catalytic, 2	protein_coding	NP_001276785.1;NP_001276786.1;NP_067306.1	1277193	.	0	0	0	5	0	0
14380	NM_019468	G6pd2	glucose-6-phosphate dehydrogenase 2	protein_coding	NP_062341.2	105977	.	0	0	0	0	0	0
14381	NM_008062	G6pdx	glucose-6-phosphate dehydrogenase X-linked	protein_coding	NP_032088.1	105979	.	1242	1507	1220	1383	1135	1241
14385	NM_001293630,NM_001293631,NM_001357729,NM_001357730,NM_001378829,NM_001378830,NM_001378831,NM_001378832,NM_001378833,NM_001378834,NM_008063,XM_030244053,XM_030244056	Slc37a4	solute carrier family 37 (glucose-6-phosphate transporter), member 4	protein_coding	NP_001280559.1;NP_001280560.1;NP_001344658.1;NP_001344659.1;NP_001365758.1;NP_001365759.1;NP_001365760.1;NP_001365761.1;NP_001365762.1;NP_001365763.1;NP_032089.2;XP_030099913.1;XP_030099916.1	1316650	.	618	698	714	759	725	592
14387	NM_001159324,NM_008064	Gaa	glucosidase, alpha, acid	protein_coding	NP_001152796.1;NP_032090.3	95609	.	15368	13476	15990	15382	16820	15283
14388	NM_001301298,NM_021356,XM_006530674,XM_006530676,XM_006530677,XM_011248309,XM_011248310,XM_017312575,XM_017312576,XM_030243298	Gab1	growth factor receptor bound protein 2-associated protein 1	protein_coding	NP_001288227.1;NP_067331.2;XP_006530737.1;XP_006530739.1;XP_006530740.1;XP_011246611.1;XP_011246612.1;XP_017168064.1;XP_017168065.1;XP_030099158.1	108088	.	1715	2946	1969	1832	1326	2119
14389	NM_001162477,NM_010248	Gab2	growth factor receptor bound protein 2-associated protein 2	protein_coding	NP_001155949.1;NP_034378.2	1333854	.	830	1006	920	858	912	1022
14390	NM_008065,XM_006522905,XM_006522906,XM_006522907,XM_017316875,XM_017316876,XM_030248977,XR_876129	Gabpa	GA repeat binding protein, alpha	protein_coding	NP_032091.2;XP_006522968.1;XP_006522969.1;XP_006522970.1;XP_017172364.1;XP_017172365.1;XP_030104837.1	95610	.	1041	1305	1030	1048	913	1104
14391	NM_001271467,NM_001271468,NM_001271469,NM_001271470,NM_001271492,NM_001355108,NM_001355109,NM_010249,NM_207669,NR_073183,XM_006498755,XM_006498756,XM_006498757,XM_006498759,XM_006498760,XM_006498761,XM_006498762,XM_006498764,XM_030247518,XM_030247522,XM_030247523,XM_030247525,XM_030247526,XM_030247527,XM_030247528,XM_030247529,XM_030247530	Gabpb1	GA repeat binding protein, beta 1	protein_coding	NP_001258396.1;NP_001258397.1;NP_001258398.1;NP_001258399.1;NP_001258421.1;NP_001342037.1;NP_001342038.1;NP_034379.1;NP_997552.1;XP_006498818.1;XP_006498819.1;XP_006498820.1;XP_006498822.1;XP_006498823.1;XP_006498824.1;XP_006498825.1;XP_006498827.1;XP_030103378.1;XP_030103382.1;XP_030103383.1;XP_030103385.1;XP_030103386.1;XP_030103387.1;XP_030103388.1;XP_030103389.1;XP_030103390.1	95611	.	485	632	590	610	500	466
14394	NM_001359035,NM_010250,XM_006532195,XM_017314259	Gabra1	gamma-aminobutyric acid (GABA) A receptor, subunit alpha 1	protein_coding	NP_001345964.1;NP_034380.1;XP_006532258.1;XP_017169748.1	95613	.	12296	9147	12611	10777	11705	10850
14395	NM_008066,XM_006503733,XM_030254132	Gabra2	gamma-aminobutyric acid (GABA) A receptor, subunit alpha 2	protein_coding	NP_032092.1;XP_006503796.1;XP_030109992.1	95614	.	2896	2838	2918	2947	3159	3127
14396	NM_001357814,NM_001357815,NM_001357816,NM_001358103,NM_008067	Gabra3	gamma-aminobutyric acid (GABA) A receptor, subunit alpha 3	protein_coding	NP_001344743.1;NP_001344744.1;NP_001344745.1;NP_001345032.1;NP_032093.3	95615	.	1573	1276	1509	1593	2096	2434
14397	NM_001359041,NM_001359043,NM_001359044,NM_001359045,NM_001359046,NM_001359047,NM_001359048,NM_001359050,NM_010251	Gabra4	gamma-aminobutyric acid (GABA) A receptor, subunit alpha 4	protein_coding	NP_001345970.1;NP_001345972.1;NP_001345973.1;NP_001345974.1;NP_001345975.1;NP_001345976.1;NP_001345977.1;NP_001345979.1;NP_034381.1	95616	.	5473	5790	5770	5782	5055	4474
14399	NM_001099641,NM_001359049,NM_008068,XM_006532198,XM_030245559	Gabra6	gamma-aminobutyric acid (GABA) A receptor, subunit alpha 6	protein_coding	NP_001093111.1;NP_001345978.1;NP_032094.2;XP_006532261.1;XP_030101419.1	95618	.	0	0	0	0	0	0
14400	NM_001370968,NM_008069	Gabrb1	gamma-aminobutyric acid (GABA) A receptor, subunit beta 1	protein_coding	NP_001357897.1;NP_032095.1	95619	.	8727	9248	8475	8610	7562	8542
14401	NM_001347314,NM_001362646,NM_001362647,NM_001362649,NM_008070,XM_030245560	Gabrb2	gamma-aminobutyric acid (GABA) A receptor, subunit beta 2	protein_coding	NP_001334243.1;NP_001349575.1;NP_001349576.1;NP_001349578.1;NP_032096.1;XP_030101420.1	95620	.	10499	8381	10742	9509	9135	8736
14402	NM_001038701,NM_008071	Gabrb3	gamma-aminobutyric acid (GABA) A receptor, subunit beta 3	protein_coding	NP_001033790.1;NP_032097.1	95621	.	19501	17492	19956	19766	17618	15689
14403	NM_008072,XM_006538546	Gabrd	gamma-aminobutyric acid (GABA) A receptor, subunit delta	protein_coding	NP_032098.2;XP_006538609.2	95622	.	786	843	1062	912	882	694
14404	NM_017369,XM_011247523,XM_011247524,XM_011247525,XM_011247526,XR_878092	Gabre	gamma-aminobutyric acid (GABA) A receptor, subunit epsilon	protein_coding	NP_059065.2;XP_011245825.1;XP_011245826.1;XP_011245827.1;XP_011245828.1	1330235	.	0	3	0	0	2	3
14405	NM_010252,XM_006503737,XM_006503738,XM_011240701	Gabrg1	gamma-aminobutyric acid (GABA) A receptor, subunit gamma 1	protein_coding	NP_034382.2;XP_006503800.1;XP_006503801.1;XP_011239003.1	103156	.	659	802	673	787	726	923
14406	NM_001362655,NM_001362656,NM_008073,NM_177408,XM_030245561	Gabrg2	gamma-aminobutyric acid (GABA) A receptor, subunit gamma 2	protein_coding	NP_001349584.1;NP_001349585.1;NP_032099.1;NP_803127.3;XP_030101421.1	95623	.	8753	8657	9113	8597	8331	7630
14407	NM_008074,XM_017321978	Gabrg3	gamma-aminobutyric acid (GABA) A receptor, subunit gamma 3	protein_coding	NP_032100.2;XP_017177467.1	95624	.	778	706	853	696	835	871
14408	NM_008075,XM_006537612,XM_006537613	Gabrr1	gamma-aminobutyric acid (GABA) C receptor, subunit rho 1	protein_coding	NP_032101.3;XP_006537675.1;XP_006537676.1	95625	.	7	10	6	6	9	9
14409	NM_008076,XM_006537616,XM_006537617,XM_030253210	Gabrr2	gamma-aminobutyric acid (GABA) C receptor, subunit rho 2	protein_coding	NP_032102.2;XP_006537679.1;XP_006537680.1;XP_030109070.1	95626	.	45	60	32	71	36	51
14411	NM_001347433,NM_001381903,NM_001381904,NM_001381905,NM_001381906,NM_133661,XM_006505536	Slc6a12	solute carrier family 6 (neurotransmitter transporter, betaine/GABA), member 12	protein_coding	NP_001334362.1;NP_001368832.1;NP_001368833.1;NP_001368834.1;NP_001368835.1;NP_598422.2;XP_006505599.1	95628	.	9	19	15	12	7	11
14412	NM_001379107,NM_001379108,NM_144512,XM_006505538,XM_011241211	Slc6a13	solute carrier family 6 (neurotransmitter transporter, GABA), member 13	protein_coding	NP_001366036.1;NP_001366037.1;NP_653095.1;XP_006505601.1;XP_011239513.1	95629	.	127	145	140	148	106	142
14415	NM_001312900,NM_008077,XM_006498765,XM_006498766,XM_030247531,XR_001780815,XR_003950660,XR_003950661	Gad1	glutamate decarboxylase 1	protein_coding	NP_001299829.1;NP_032103.2;XP_006498828.1;XP_006498829.1;XP_030103391.1	95632	.	14073	12756	13612	13613	15224	12665
14417	NM_008078,XM_011239023	Gad2	glutamic acid decarboxylase 2	protein_coding	NP_032104.2;XP_011237325.1	95634	.	6331	5248	6296	5582	6281	5812
14419	NM_001329667,NM_010253	Gal	galanin and GMAP prepropeptide	protein_coding	NP_001316596.1;NP_034383.1	95637	.	9	2	7	7	8	6
14420	NM_008079,XM_006515472,XM_017314960,XM_030246561	Galc	galactosylceramidase	protein_coding	NP_032105.2;XP_006515535.1;XP_017170449.1;XP_030102421.1	95636	.	967	1239	966	965	835	889
14421	NM_001244617,NM_001244618,NM_001358577,NM_001358578,NM_008080,NM_027739,NR_045166,XM_006513219,XM_017313803	B4galnt1	beta-1,4-N-acetyl-galactosaminyl transferase 1	protein_coding	NP_001231546.1;NP_001231547.1;NP_001345506.1;NP_001345507.1;NP_032106.1;NP_082015.2;XP_006513282.1;XP_017169292.1	1342057	.	4595	4636	5162	5336	4993	3818
14422	NM_008081,XM_006532201	B4galnt2	beta-1,4-N-acetyl-galactosaminyl transferase 2	protein_coding	NP_032107.1;XP_006532264.1	1342058	.	13	7	9	14	9	3
14423	NM_001160404,NM_001361200,NM_013814,XM_030250335,XM_030250336	Galnt1	polypeptide N-acetylgalactosaminyltransferase 1	protein_coding	NP_001153876.1;NP_001348129.1;NP_038842.3;XP_030106195.1;XP_030106196.1	894693	.	2208	2868	2342	2499	2130	2505
14425	NM_015736,XR_374409	Galnt3	polypeptide N-acetylgalactosaminyltransferase 3	protein_coding	NP_056551.2	894695	.	102	91	96	98	107	84
14426	NM_015737	Galnt4	polypeptide N-acetylgalactosaminyltransferase 4	protein_coding	NP_056552.1	894692	.	209	352	225	269	172	281
14427	NM_008082	Galr1	galanin receptor 1	protein_coding	NP_032108.1	1096364	.	0	3	0	0	6	19
14428	NM_010254,XM_011248727,XM_011248728,XM_011248729	Galr2	galanin receptor 2	protein_coding	NP_034384.3;XP_011247029.1;XP_011247030.1;XP_011247031.1	1337018	.	0	0	0	2	0	0
14429	NM_015738	Galr3	galanin receptor 3	protein_coding	NP_056553.2	1329003	.	0	0	0	0	0	0
14430	NM_001302511,NM_001369135,NM_001369140,NM_001369141,NM_001369142,NM_001369143,NM_001369144,NM_001369147,NM_016658	Galt	galactose-1-phosphate uridyl transferase	protein_coding	NP_001289440.1;NP_001356064.1;NP_001356069.1;NP_001356070.1;NP_001356071.1;NP_001356072.1;NP_001356073.1;NP_001356076.1;NP_057867.2	95638	.	579	616	603	663	670	563
14431	NM_001347119,NM_010255,XM_006513222	Gamt	guanidinoacetate methyltransferase	protein_coding	NP_001334048.1;NP_034385.1;XP_006513285.1	1098221	.	357	551	457	444	349	384
14432	NM_008083	Gap43	growth associated protein 43	protein_coding	NP_032109.1	95639	.	2279	2117	2366	2725	3194	3346
14433	NM_001289726,NM_008084,XM_017321385	Gapdh	glyceraldehyde-3-phosphate dehydrogenase	protein_coding	NP_001276655.1;NP_032110.1;XP_017176874.1	95640	.	36845	41305	44336	43756	41285	32824
14447	NM_001290631,NM_008085,XM_006539545,XM_011250435	Gapdhs	glyceraldehyde-3-phosphate dehydrogenase, spermatogenic	protein_coding	NP_001277560.1;NP_032111.1;XP_006539608.1;XP_011248737.1	95653	.	0	0	0	0	0	0
14450	NM_001357351,NM_010256,XM_006522911,XM_006522912	Gart	phosphoribosylglycinamide formyltransferase	protein_coding	NP_001344280.1;NP_034386.2;XP_006522974.1;XP_006522975.1	95654	.	1318	1493	1345	1352	1299	1412
14451	NM_008086	Gas1	growth arrest specific 1	protein_coding	NP_032112.1	95655	.	199	272	231	253	216	244
14453	NM_001330607,NM_001330608,NM_008087,XM_006540618,XM_006540619,XM_006540620,XM_006540621,XM_006540622,XM_006540623,XM_006540624,XM_006540625,XM_006540626,XM_011250796,XM_011250797,XM_017321979,XM_017321980,XM_017321982,XM_030242134,XM_030242135,XM_030242136,XM_030242137,XM_030242138,XM_030242139,XM_030242140,XM_030242141	Gas2	growth arrest specific 2	protein_coding	NP_001317536.1;NP_001317537.1;NP_032113.1;XP_006540681.1;XP_006540682.1;XP_006540683.1;XP_006540684.1;XP_006540685.1;XP_006540686.1;XP_006540687.1;XP_006540688.1;XP_006540689.1;XP_011249098.1;XP_011249099.1;XP_017177468.1;XP_017177469.1;XP_017177471.1;XP_030097994.1;XP_030097995.1;XP_030097996.1;XP_030097997.1;XP_030097998.1;XP_030097999.1;XP_030098000.1;XP_030098001.1	95657	.	286	339	210	269	247	247
14455	NR_153812,NR_153813,NR_153814,NR_153815,NR_166050,NR_166051,NR_166052,NR_166055	Gas5	growth arrest specific 5	lncRNA	.	95659	.	2344	3090	2663	2752	2863	3674
14456	NM_019521	Gas6	growth arrest specific 6	protein_coding	NP_062394.2	95660	.	3670	3840	3102	3016	2911	3035
14457	NM_001109657,NM_001277079,NM_001277080,NM_008088,XM_006532202,XM_006532205,XM_006532208,XM_006532209,XM_006532210,XM_006532211,XM_017314262,XM_030245562,XM_030245563,XM_030245564	Gas7	growth arrest specific 7	protein_coding	NP_001103127.1;NP_001264008.1;NP_001264009.1;NP_032114.2;XP_006532265.1;XP_006532268.1;XP_006532271.1;XP_006532272.1;XP_006532273.1;XP_006532274.1;XP_017169751.1;XP_030101422.1;XP_030101423.1;XP_030101424.1	1202388	.	19069	17712	18816	19233	18799	17437
14459	NM_010257	Gast	gastrin	protein_coding	NP_034387.3	104768	.	0	0	0	0	0	4
14460	NM_008089,XM_011247448	Gata1	GATA binding protein 1	protein_coding	NP_032115.1;XP_011245750.1	95661	.	0	0	0	0	0	0
14461	NM_001355253,NM_008090	Gata2	GATA binding protein 2	protein_coding	NP_001342182.1;NP_032116.4	95662	.	137	154	145	161	109	150
14462	NM_001355110,NM_001355111,NM_001355112,NM_008091,XM_006497354,XM_030247532,XM_030247533	Gata3	GATA binding protein 3	protein_coding	NP_001342039.1;NP_001342040.1;NP_001342041.1;NP_032117.1;XP_006497417.1;XP_030103392.1;XP_030103393.1	95663	.	12	0	0	2	0	0
14463	NM_001310610,NM_008092,XM_011244956,XM_011244957	Gata4	GATA binding protein 4	protein_coding	NP_001297539.1;NP_032118.2;XP_011243258.1;XP_011243259.1	95664	.	0	0	0	0	0	0
14464	NM_008093,XM_006500554	Gata5	GATA binding protein 5	protein_coding	NP_032119.2;XP_006500617.1	109497	.	0	0	0	0	0	0
14465	NM_010258,XM_017317834	Gata6	GATA binding protein 6	protein_coding	NP_034388.2;XP_017173323.1	107516	.	0	0	0	0	0	0
14466	NM_001077411,NM_008094,NR_122037,XM_006500997,XR_003954280,XR_003954281	Gba	glucosidase, beta, acid	protein_coding	NP_001070879.1;NP_032120.1;XP_006501060.1	95665	.	1031	1291	1203	1201	1136	945
14467	NM_008095,XR_377051,XR_377052,XR_377054	Nipsnap2	nipsnap homolog 2	protein_coding	NP_032121.3	1278343	.	2972	3309	2953	3000	2679	2446
14468	NM_010259,XM_011240014,XM_030252421	Gbp2b	guanylate binding protein 2b	protein_coding	NP_034389.2;XP_011238316.1;XP_030108281.1	95666	.	0	0	0	0	0	0
14469	NM_010260	Gbp2	guanylate binding protein 2	protein_coding	NP_034390.1	102772	.	176	587	187	226	159	296
14470	NM_010261	Rabac1	Rab acceptor 1 (prenylated)	protein_coding	NP_034391.1	1201692	.	2695	3322	3297	3100	3046	2876
14472	NM_010262	Gbx2	gastrulation brain homeobox 2	protein_coding	NP_034392.1	95668	.	0	0	0	3	0	4
14473	NM_008096	Gc	vitamin D binding protein	protein_coding	NP_032122.1	95669	.	0	0	0	0	0	0
14479	NM_001301628,NM_027604,XM_006513225,XM_006513226,XM_006513227,XM_006513228,XR_380365	Usp15	ubiquitin specific peptidase 15	protein_coding	NP_001288557.1;NP_081880.2;XP_006513288.1;XP_006513289.1;XP_006513290.1;XP_006513291.1	101857	.	3415	3469	3509	3538	3425	3202
14489	NM_008098	Mtpn	myotrophin	protein_coding	NP_032124.1	99445	.	15101	15040	15121	15172	14058	12364
14525	NM_001159297,NM_008099	Gcsam	germinal center associated, signaling and motility	protein_coding	NP_001152769.1;NP_032125.3	102969	.	0	0	0	0	0	0
14526	NM_008100	Gcg	glucagon	protein_coding	NP_032126.1	95674	.	0	0	0	0	0	0
14527	NM_008101,XM_006532216,XM_006532217,XM_017314263,XM_017314265,XM_017314266,XM_017314267,XM_017314268,XM_017314269,XM_030245565,XM_030245566,XM_030245567	Gcgr	glucagon receptor	protein_coding	NP_032127.2;XP_006532279.1;XP_006532280.1;XP_017169752.1;XP_017169754.1;XP_017169755.1;XP_017169756.1;XP_017169757.1;XP_017169758.1;XP_030101425.1;XP_030101426.1;XP_030101427.1	99572	.	0	0	0	0	3	0
14528	NM_008102	Gch1	GTP cyclohydrolase 1	protein_coding	NP_032128.1	95675	.	63	61	71	48	63	48
14531	NM_008103	Gcm1	glial cells missing homolog 1	protein_coding	NP_032129.2	108045	.	0	0	0	0	0	0
14533	NM_015740	Bloc1s1	biogenesis of lysosomal organelles complex-1, subunit 1	protein_coding	NP_056555.2	1195276	.	952	1272	995	1158	996	1056
14534	NM_001038010,NM_020004,NR_166132,NR_166133,XM_017314270,XM_017314271,XM_017314272,XM_017314273	Kat2a	K(lysine) acetyltransferase 2A	protein_coding	NP_001033099.1;NP_064388.2;XP_017169759.1;XP_017169760.1;XP_017169761.1;XP_017169762.1	1343101	.	2505	2505	2841	2765	2685	2065
14536	NM_001159548,NM_001159549,NM_010264,XM_011239025	Nr6a1	nuclear receptor subfamily 6, group A, member 1	protein_coding	NP_001153020.1;NP_001153021.1;NP_034394.1;XP_011237327.1	1352459	.	245	268	270	262	347	270
14537	NM_001136484,NM_010265,NM_173442,XM_006526679,XM_011247144,XM_017318062	Gcnt1	glucosaminyl (N-acetyl) transferase 1, core 2	protein_coding	NP_001129956.3;NP_034395.4;NP_775618.3;XP_006526742.1;XP_011245446.1;XP_017173551.1	95676	.	169	282	156	178	105	231
14538	NM_008105,NM_023887,NM_133219,XR_003950428,XR_003950429,XR_003950430	Gcnt2	glucosaminyl (N-acetyl) transferase 2, I-branching enzyme	protein_coding	NP_032131.2;NP_076376.3;NP_573482.1	1100870	.	813	795	798	952	880	1023
14539	NM_008106	Opn1mw	opsin 1 (cone pigments), medium-wave-sensitive (color blindness, deutan)	protein_coding	NP_032132.1	1097692	.	6	7	0	0	0	7
14544	NM_010266,XM_006526680,XM_017318064	Gda	guanine deaminase	protein_coding	NP_034396.1;XP_006526743.1;XP_017173553.1	95678	.	7583	7780	7409	7706	8458	9134
14545	NM_010267	Gdap1	ganglioside-induced differentiation-associated-protein 1	protein_coding	NP_034397.1	1338002	.	4560	3960	4422	4304	4334	3574
14547	NM_010269,NR_104341,XM_006501001,XR_001783651	Gdap2	ganglioside-induced differentiation-associated-protein 2	protein_coding	NP_034399.1;XP_006501064.1	1338001	.	1730	1807	1687	1842	1715	1379
14548	NM_001010930,NM_010270	Mrps33	mitochondrial ribosomal protein S33	protein_coding	NP_001010930.1;NP_034400.1	1338046	.	1830	1829	1703	1746	1798	1569
14555	NM_010271	Gpd1	glycerol-3-phosphate dehydrogenase 1 (soluble)	protein_coding	NP_034401.1	95679	.	5555	6073	6082	6184	5736	5176
14559	NM_001163282,NM_008107	Gdf1	growth differentiation factor 1	protein_coding	NP_001156754.1;NP_032133.2	95683	.	45	29	4198	43	26	82
14560	NM_145741	Gdf10	growth differentiation factor 10	protein_coding	NP_665684.2	95684	.	523	642	574	595	590	485
14561	NM_010272	Gdf11	growth differentiation factor 11	protein_coding	NP_034402.1	1338027	.	1091	1309	1145	1121	1041	954
14562	NM_008108,XM_006505540	Gdf3	growth differentiation factor 3	protein_coding	NP_032134.2;XP_006505603.1	95686	.	0	0	0	0	0	0
14563	NM_008109	Gdf5	growth differentiation factor 5	protein_coding	NP_032135.2	95688	.	14	25	9	7	8	15
14566	NM_008110,XM_006532220,XM_006532221,XM_030245570	Gdf9	growth differentiation factor 9	protein_coding	NP_032136.2;XP_006532283.1;XP_006532284.1;XP_030101430.1	95692	.	50	72	41	38	50	45
14567	NM_010273	Gdi1	guanosine diphosphate (GDP) dissociation inhibitor 1	protein_coding	NP_034403.1	99846	.	21993	23330	23584	24427	23873	19789
14569	NM_008112	Gdi2	guanosine diphosphate (GDP) dissociation inhibitor 2	protein_coding	NP_032138.3	99845	.	10352	10953	10151	10730	10204	10179
14570	NM_008113	Arhgdig	Rho GDP dissociation inhibitor (GDI) gamma	protein_coding	NP_032139.1	108430	.	1216	1243	1418	1256	1301	994
14571	NM_001145820,NM_010274	Gpd2	glycerol phosphate dehydrogenase 2, mitochondrial	protein_coding	NP_001139292.1;NP_034404.3	99778	.	8193	7850	8600	8717	7812	8562
14573	NM_001301332,NM_001301333,NM_001301357,NM_010275	Gdnf	glial cell line derived neurotrophic factor	protein_coding	NP_001288261.1;NP_001288262.1;NP_001288286.1;NP_034405.1	107430	.	0	2	0	5	6	3
14579	NM_010276	Gem	GTP binding protein (gene overexpressed in skeletal muscle)	protein_coding	NP_034406.2	99844	.	92	235	104	140	77	164
14580	NM_001131020,NM_010277,XM_030245571,XR_388347	Gfap	glial fibrillary acidic protein	protein_coding	NP_001124492.1;NP_034407.2;XP_030101431.1	95697	.	18547	57135	20473	32875	18067	44146
14581	NM_001267621,NM_010278	Gfi1	growth factor independent 1 transcription repressor	protein_coding	NP_001254550.1;NP_034408.1	103170	.	0	2	0	0	0	0
14582	NM_001160406,NM_008114	Gfi1b	growth factor independent 1B	protein_coding	NP_001153878.1;NP_032140.1	1276578	.	0	0	0	0	0	0
14583	NM_013528	Gfpt1	glutamine fructose-6-phosphate transaminase 1	protein_coding	NP_038556.1	95698	.	3050	3068	3056	2905	2817	3004
14584	NM_013529	Gfpt2	glutamine fructose-6-phosphate transaminase 2	protein_coding	NP_038557.1	1338883	.	231	295	204	253	175	275
14585	NM_001285457,NM_010279,NR_104342,XM_006526681,XM_006526682,XM_006526683,XM_006526684,XM_030250753	Gfra1	glial cell line derived neurotrophic factor family receptor alpha 1	protein_coding	NP_001272386.1;NP_034409.1;XP_006526744.1;XP_006526745.1;XP_006526746.1;XP_006526747.1;XP_030106613.1	1100842	.	1963	2241	2323	2311	2091	2154
14586	NM_001302094,NM_001302095,NM_008115	Gfra2	glial cell line derived neurotrophic factor family receptor alpha 2	protein_coding	NP_001289023.1;NP_001289024.1;NP_032141.2	1195462	.	1063	1234	1355	1364	1197	1151
14587	NM_010280	Gfra3	glial cell line derived neurotrophic factor family receptor alpha 3	protein_coding	NP_034410.3	1201403	.	0	0	0	0	0	0
14588	NM_001136063,NM_001271001,NM_001271002,NM_020014,XM_017315629,XM_030247541,XR_001780825,XR_003950726,XR_003950732,XR_003950738,XR_866224,XR_866225,XR_866226	Gfra4	glial cell line derived neurotrophic factor family receptor alpha 4	protein_coding	NP_001129535.1;NP_001257930.1;NP_001257931.1;NP_064398.1;XP_017171118.1;XP_030103401.1	1341873	.	1220	1317	1479	1531	1526	1070
14590	NM_010281,XM_006537619	Ggh	gamma-glutamyl hydrolase	protein_coding	NP_034411.2;XP_006537682.1	1329035	.	650	552	449	498	510	552
14593	NM_001331119,NM_001331176,NM_001331177,NM_001331178,NM_001331180,NM_010282,NR_138552,NR_138553,NR_138555,XM_006516549,XM_011244281,XM_017315385,XM_017315387,XM_017315388,XM_030247152,XM_030247153,XM_030247154,XM_030247155,XR_001780754,XR_003950431,XR_003950432	Ggps1	geranylgeranyl diphosphate synthase 1	protein_coding	NP_001318048.1;NP_001318105.1;NP_001318106.1;NP_001318107.1;NP_001318109.1;NP_034412.1;XP_006516612.1;XP_011242583.1;XP_017170874.1;XP_017170876.1;XP_017170877.1;XP_030103012.1;XP_030103013.1;XP_030103014.1;XP_030103015.1	1341724	.	2290	2360	2156	2148	2167	2251
14594	NM_001145821,NM_001308299,NM_001308300,NM_010283,XM_006497720,XM_011239026,XM_011239027,XM_011239028,XM_011239029,XM_030247542,XM_030247543,XM_030247544,XM_030247545	Ggta1	glycoprotein galactosyltransferase alpha 1, 3	protein_coding	NP_001139293.1;NP_001295228.1;NP_001295229.1;NP_034413.2;XP_006497783.1;XP_011237328.1;XP_011237329.1;XP_011237330.1;XP_011237331.1;XP_030103402.1;XP_030103403.1;XP_030103404.1;XP_030103405.1	95704	.	176	546	204	297	188	421
14595	NM_001378519,NM_022305,NR_165793	B4galt1	UDP-Gal:betaGlcNAc beta 1,4- galactosyltransferase, polypeptide 1	protein_coding	NP_001365448.1;NP_071641.1	95705	.	419	460	300	305	303	323
14598	NM_001305992,NM_001379537,NM_001379538,NM_001379539,NM_001379540,NM_001379541,NM_008116,XR_003948591,XR_003948592	Ggt1	gamma-glutamyltransferase 1	protein_coding	NP_001292921.1;NP_001366466.1;NP_001366467.1;NP_001366468.1;NP_001366469.1;NP_001366470.1;NP_032142.1	95706	.	61	91	63	65	58	62
14599	NM_008117,XM_006532223	Gh	growth hormone	protein_coding	NP_032143.1;XP_006532286.1	95707	.	0	0	0	0	0	0
14600	NM_001048178,NM_001286370,NM_010284	Ghr	growth hormone receptor	protein_coding	NP_001041643.1;NP_001273299.1;NP_034414.2	95708	.	306	273	211	249	245	268
14601	NM_001329683,NM_010285,XM_006498773	Ghrh	growth hormone releasing hormone	protein_coding	NP_001316612.1;NP_034415.1;XP_006498836.1	95709	.	3	0	5	6	0	3
14602	NM_001003685	Ghrhr	growth hormone releasing hormone receptor	protein_coding	NP_001003685.2	95710	.	0	0	0	0	0	0
14603	NM_008118,XM_006526688	Cblif	cobalamin binding intrinsic factor	protein_coding	NP_032144.2;XP_006526751.1	1202394	.	0	0	0	0	0	0
14605	NM_001077364,NM_010286,NR_122039,XM_006528499,XM_006528500,XM_006528503,XM_006528504,XM_006528505	Tsc22d3	TSC22 domain family, member 3	protein_coding	NP_001070832.1;NP_034416.3;XP_006528562.1;XP_006528563.1;XP_006528566.1;XP_006528567.1;XP_006528568.1	1196284	.	3062	4389	3590	3734	4143	5373
14607	NM_008119,XM_006532224,XM_006532225	Gip	gastric inhibitory polypeptide	protein_coding	NP_032145.2;XP_006532287.1;XP_006532288.1	107504	.	0	0	0	0	0	0
14608	NM_001310734,NM_010287,XM_006510017,XM_030244058	Gpr83	G protein-coupled receptor 83	protein_coding	NP_001297663.1;NP_034417.1;XP_006510080.1;XP_030099918.1	95712	.	814	717	768	807	858	510
14609	NM_010288	Gja1	gap junction protein, alpha 1	protein_coding	NP_034418.1	95713	.	9096	15347	10132	12167	8941	14480
14610	NM_010289	Gja10	gap junction protein, alpha 10	protein_coding	NP_034419.2	1339969	.	0	1	0	0	0	0
14611	NM_001271623,NM_016975,XM_011244959	Gja3	gap junction protein, alpha 3	protein_coding	NP_001258552.1;NP_058671.2;XP_011243261.1	95714	.	53	48	39	36	45	24
14612	NM_008120	Gja4	gap junction protein, alpha 4	protein_coding	NP_032146.1	95715	.	44	81	48	62	52	55
14613	NM_001271628,NM_008121	Gja5	gap junction protein, alpha 5	protein_coding	NP_001258557.1;NP_032147.1	95716	.	6	12	16	21	10	11
14615	NM_001159382,NM_001159383,NM_001359040,NM_008122,XM_006532227,XM_011248736,XM_030245572,XM_030245573	Gjc1	gap junction protein, gamma 1	protein_coding	NP_001152854.1;NP_001152855.1;NP_001345969.1;NP_032148.1;XP_006532290.1;XP_011247038.1;XP_030101432.1;XP_030101433.1	95718	.	95	153	104	104	100	151
14616	NM_008123	Gja8	gap junction protein, alpha 8	protein_coding	NP_032149.1	99953	.	0	0	0	0	0	0
14617	NM_010290,XM_017315645,XM_030247546	Gjd2	gap junction protein, delta 2	protein_coding	NP_034420.2;XP_017171134.1;XP_030103406.1	1334209	.	159	173	142	158	204	121
14618	NM_001302496,NM_001302497,NM_001302498,NM_008124,XM_030251227	Gjb1	gap junction protein, beta 1	protein_coding	NP_001289425.1;NP_001289426.1;NP_001289427.1;NP_032150.2;XP_030107087.1	95719	.	631	1084	758	689	386	567
14619	NM_008125	Gjb2	gap junction protein, beta 2	protein_coding	NP_032151.1	95720	.	178	226	192	228	159	268
14620	NM_001160012,NM_008126	Gjb3	gap junction protein, beta 3	protein_coding	NP_001153484.1;NP_032152.1	95721	.	9	7	4	10	6	5
14621	NM_008127,XM_017319975,XM_017319976,XM_030253211	Gjb4	gap junction protein, beta 4	protein_coding	NP_032153.1;XP_017175464.1;XP_017175465.1;XP_030109071.1	95722	.	2	0	3	0	0	7
14622	NM_010291	Gjb5	gap junction protein, beta 5	protein_coding	NP_034421.1	95723	.	0	0	0	0	0	2
14623	NM_001010937,NM_001271663,XM_006518560,XM_006518561,XM_030247651	Gjb6	gap junction protein, beta 6	protein_coding	NP_001010937.1;NP_001258592.1;XP_006518623.1;XP_006518624.1;XP_030103511.1	107588	.	1604	2299	1850	2211	1980	2524
14625	NM_010293	Gykl1	glycerol kinase-like 1	protein_coding	NP_034423.2	891990	.	0	0	0	0	0	0
14626	NM_010294	Gk2	glycerol kinase 2	protein_coding	NP_034424.1	1329027	.	0	0	0	0	0	0
14628	NM_172416	Ostm1	osteopetrosis associated transmembrane protein 1	protein_coding	NP_766004.1	2655574	.	2810	2673	2988	2846	2817	2430
14629	NM_010295,NR_151778,XM_006510812	Gclc	glutamate-cysteine ligase, catalytic subunit	protein_coding	NP_034425.1;XP_006510875.1	104990	.	2285	2522	2291	2042	2023	1846
14630	NM_008129,XM_030252423	Gclm	glutamate-cysteine ligase, modifier subunit	protein_coding	NP_032155.1;XP_030108283.1	104995	.	1020	1327	1095	1198	1028	1206
14632	NM_010296	Gli1	GLI-Kruppel family member GLI1	protein_coding	NP_034426.2	95727	.	19	24	23	19	34	37
14633	NM_001081125,XM_006529141,XM_011247924,XM_030248278	Gli2	GLI-Kruppel family member GLI2	protein_coding	NP_001074594.1;XP_006529204.1;XP_011246226.1;XP_030104138.1	95728	.	181	322	179	219	150	191
14634	NM_008130,XM_006516552,XM_017315389	Gli3	GLI-Kruppel family member GLI3	protein_coding	NP_032156.2;XP_006516615.1;XP_017170878.1	95729	.	254	408	328	331	281	394
14635	NM_016905	Galk1	galactokinase 1	protein_coding	NP_058601.2	95730	.	266	354	246	291	224	315
14645	NM_008131	Glul	glutamate-ammonia ligase (glutamine synthetase)	protein_coding	NP_032157.2	95739	.	63209	81648	76059	75400	65661	73678
14651	NM_001159626,NM_024284,XM_006523660,XM_006523661	Hagh	hydroxyacyl glutathione hydrolase	protein_coding	NP_001153098.1;NP_077246.2;XP_006523723.1;XP_006523724.1	95745	.	2777	2889	2931	3072	2955	2728
14652	NM_021332	Glp1r	glucagon-like peptide 1 receptor	protein_coding	NP_067307.2	99571	.	17	16	16	11	21	20
14654	NM_001290821,NM_020492	Glra1	glycine receptor, alpha 1 subunit	protein_coding	NP_001277750.1;NP_065238.2	95747	.	0	0	0	0	2	0
14657	NM_010297,XM_017318384	Glra4	glycine receptor, alpha 4 subunit	protein_coding	NP_034427.2;XP_017173873.1	95750	.	6	5	4	4	6	14
14658	NM_001281969,NM_001345955,NM_001345956,NM_001345957,NM_001345958,NM_001345959,NM_001345996,NM_010298,XM_030252424,XM_030252425,XM_030252426,XM_030252427,XM_030252428,XM_030252429	Glrb	glycine receptor, beta subunit	protein_coding	NP_001268898.1;NP_001332884.1;NP_001332885.1;NP_001332886.1;NP_001332887.1;NP_001332888.1;NP_001332925.1;NP_034428.2;XP_030108284.1;XP_030108285.1;XP_030108286.1;XP_030108287.1;XP_030108288.1;XP_030108289.1	95751	.	8572	8193	8075	7960	7571	7487
14659	NM_008132,XM_030248367,XM_030248384	Glrp1	glutamine repeat protein 1	protein_coding	NP_032158.2;XP_030104227.1;XP_030104244.1	108038	.	7	5	4	0	4	0
14660	NM_001081081,NM_001113383,XM_006495701,XM_006495702,XM_006495703,XM_006495704,XM_017316236,XM_030248503,XR_001781161,XR_001781162,XR_373241	Gls	glutaminase	protein_coding	NP_001074550.1;NP_001106854.1;XP_006495764.1;XP_006495765.1;XP_006495766.1;XP_006495767.1;XP_017171725.1;XP_030104363.1	95752	.	14235	14142	13397	13751	13967	11943
14661	NM_008133	Glud1	glutamate dehydrogenase 1	protein_coding	NP_032159.1	95753	.	9928	12859	10952	11929	10618	12972
14663	NM_001289587,NM_008134	Glycam1	glycosylation dependent cell adhesion molecule 1	protein_coding	NP_001276516.1;NP_032160.1	95759	.	11	66	9	29	8	42
14664	NM_001355175,NM_001369016,NM_001369017,NM_008135,XM_030253212,XR_867807	Slc6a9	solute carrier family 6 (neurotransmitter transporter, glycine), member 9	protein_coding	NP_001342104.1;NP_001355945.1;NP_001355946.1;NP_032161.2;XP_030109072.1	95760	.	1872	2648	2232	1990	1602	2028
14667	NM_010299	Gm2a	GM2 ganglioside activator protein	protein_coding	NP_034429.1	95762	.	2656	3380	2596	2778	2400	2718
14670	NM_008136	Gnl1	guanine nucleotide binding protein-like 1	protein_coding	NP_032162.2	95764	.	5523	5316	6182	5954	5916	5532
14672	NM_010301	Gna11	guanine nucleotide binding protein, alpha 11	protein_coding	NP_034431.1	95766	.	5987	6507	6842	6971	6569	5560
14673	NM_010302	Gna12	guanine nucleotide binding protein, alpha 12	protein_coding	NP_034432.1	95767	.	2567	3961	3205	3017	2272	2455
14674	NM_001359034,NM_010303	Gna13	guanine nucleotide binding protein, alpha 13	protein_coding	NP_001345963.1;NP_034433.3	95768	.	2798	4095	3088	3318	2711	4050
14675	NM_008137	Gna14	guanine nucleotide binding protein, alpha 14	protein_coding	NP_032163.3	95769	.	32	28	39	40	48	28
14676	NM_010304,XM_006513233,XM_006513234,XM_030244885	Gna15	guanine nucleotide binding protein, alpha 15	protein_coding	NP_034434.1;XP_006513296.1;XP_006513297.1;XP_030100745.1	95770	.	81	133	87	105	63	87
14677	NM_010305	Gnai1	guanine nucleotide binding protein (G protein), alpha inhibiting 1	protein_coding	NP_034435.1	95771	.	7159	7309	6914	6796	7379	7352
14678	NM_008138,XM_006511637	Gnai2	guanine nucleotide binding protein (G protein), alpha inhibiting 2	protein_coding	NP_032164.2;XP_006511700.1	95772	.	5789	8600	6976	7511	6377	7462
14679	NM_010306	Gnai3	guanine nucleotide binding protein (G protein), alpha inhibiting 3	protein_coding	NP_034436.1	95773	.	1734	2172	1693	1804	1572	1861
14680	NM_010307,NM_177137,XM_030250337	Gnal	guanine nucleotide binding protein, alpha stimulating, olfactory type	protein_coding	NP_034437.1;NP_796111.2;XP_030106197.1	95774	.	5188	5080	5916	5617	5347	4177
14681	NM_001113384,NM_010308,XM_011248311	Gnao1	guanine nucleotide binding protein, alpha O	protein_coding	NP_001106855.1;NP_034438.1;XP_011246613.1	95775	.	25538	27312	28666	28012	24427	22485
14682	NM_008139	Gnaq	guanine nucleotide binding protein, alpha q polypeptide	protein_coding	NP_032165.3	95776	.	15535	14371	16562	16220	15065	12672
14683	NM_001077507,NM_001077510,NM_001310083,NM_001310085,NM_001364030,NM_010309,NM_019690,NM_022000,NM_201616,NM_201617,NM_201618,NR_003258,XM_006498774,XM_006498777,XM_006498778,XM_006498779,XM_006498780,XM_017315658,XM_030247568,XM_030247569,XR_003950807,XR_374413,XR_374414	Gnas	GNAS (guanine nucleotide binding protein, alpha stimulating) complex locus	protein_coding	NP_001070975.1;NP_001070978.1;NP_001297012.1;NP_001297014.1;NP_001350959.1;NP_034439.2;NP_062664.2;NP_068840.2;NP_963910.1;NP_963911.1;NP_963912.1;XP_006498837.1;XP_006498840.1;XP_006498841.1;XP_006498842.1;XP_006498843.1;XP_017171147.1;XP_030103428.1;XP_030103429.1	95777	.	49260	48264	48821	51102	51624	40748
14685	NM_008140	Gnat1	guanine nucleotide binding protein, alpha transducing 1	protein_coding	NP_032166.1	95778	.	2	3	2	0	0	0
14686	NM_008141,XM_006501008,XM_030252431	Gnat2	guanine nucleotide binding protein, alpha transducing 2	protein_coding	NP_032167.1;XP_006501071.1;XP_030108291.1	95779	.	0	0	0	0	0	0
14687	NM_001358848,NM_010311,XM_006513235,XM_006513236	Gnaz	guanine nucleotide binding protein, alpha z subunit	protein_coding	NP_001345777.1;NP_034441.1;XP_006513298.1;XP_006513299.1	95780	.	2880	2448	3377	3077	3019	2232
14688	NM_001160016,NM_001160017,NM_008142,XM_017319977	Gnb1	guanine nucleotide binding protein (G protein), beta 1	protein_coding	NP_001153488.1;NP_001153489.1;NP_032168.1;XP_017175466.1	95781	.	23202	23002	24221	24552	24018	20970
14693	NM_010312,XM_006504553	Gnb2	guanine nucleotide binding protein (G protein), beta 2	protein_coding	NP_034442.1;XP_006504616.1	95784	.	8741	9682	10150	9836	9086	8066
14694	NM_008143	Rack1	receptor for activated C kinase 1	protein_coding	NP_032169.1	101849	.	6020	7702	6901	7115	6582	6203
14695	NM_013530	Gnb3	guanine nucleotide binding protein (G protein), beta 3	protein_coding	NP_038558.1	95785	.	9	6	0	2	0	0
14696	NM_001348062,NM_001348104,NM_001348105,NM_013531,XM_006535404	Gnb4	guanine nucleotide binding protein (G protein), beta 4	protein_coding	NP_001334991.1;NP_001335033.1;NP_001335034.1;NP_038559.2;XP_006535467.1	104581	.	478	674	564	626	545	687
14697	NM_010313,NM_138719,NR_073186	Gnb5	guanine nucleotide binding protein (G protein), beta 5	protein_coding	NP_034443.1;NP_619733.1	101848	.	4377	4224	4825	4745	4679	4201
14699	NM_010314,XM_006504986,XM_017321387,XM_017321388,XM_017321389	Gngt1	guanine nucleotide binding protein (G protein), gamma transducing activity polypeptide 1	protein_coding	NP_034444.1;XP_006505049.1;XP_017176876.1;XP_017176877.1;XP_017176878.1	109165	.	0	0	0	0	0	0
14700	NM_025277	Gng10	guanine nucleotide binding protein (G protein), gamma 10	protein_coding	NP_079553.1	1336169	.	1523	1658	1546	1577	1493	1494
14701	NM_001177556,NM_001177557,NM_001177558,NM_001177559,NM_001177560,NM_025278,XM_006505542	Gng12	guanine nucleotide binding protein (G protein), gamma 12	protein_coding	NP_001171027.1;NP_001171028.1;NP_001171029.1;NP_001171030.1;NP_001171031.1;NP_079554.1;XP_006505605.1	1336171	.	2593	3297	2845	2948	2598	3020
14702	NM_001038637,NM_001285908,NM_001285909,NM_001285910,NM_001285911,NM_010315,XM_030247652	Gng2	guanine nucleotide binding protein (G protein), gamma 2	protein_coding	NP_001033726.1;NP_001272837.1;NP_001272838.1;NP_001272839.1;NP_001272840.1;NP_034445.1;XP_030103512.1	102705	.	14716	14210	14364	14548	13583	11427
14704	NM_010316	Gng3	guanine nucleotide binding protein (G protein), gamma 3	protein_coding	NP_034446.1	102704	.	4637	4599	4878	5481	5491	4515
14705	NM_001136064,NM_001290823,NM_008144,XM_006526691,XM_030250754	Bscl2	Berardinelli-Seip congenital lipodystrophy 2 (seipin)	protein_coding	NP_001129536.1;NP_001277752.1;NP_032170.3;XP_006526754.1;XP_030106614.1	1298392	.	2026	2010	2162	2316	2235	2049
14706	NM_001302997,NM_010317	Gng4	guanine nucleotide binding protein (G protein), gamma 4	protein_coding	NP_001289926.1;NP_034447.1	102703	.	734	666	821	888	967	791
14707	NM_010318	Gng5	guanine nucleotide binding protein (G protein), gamma 5	protein_coding	NP_034448.2	109164	.	534	821	641	609	550	697
14708	NM_001038655,NM_010319	Gng7	guanine nucleotide binding protein (G protein), gamma 7	protein_coding	NP_001033744.1;NP_034449.2	95787	.	8428	9290	9981	8886	8874	7707
14709	NM_010320,XM_006539547,XM_006539548,XM_006539549,XM_011250436	Gng8	guanine nucleotide binding protein (G protein), gamma 8	protein_coding	NP_034450.1;XP_006539610.1;XP_006539611.1;XP_006539612.1;XP_011248738.1	109163	.	59	82	63	46	41	41
14710	NM_001038664,NM_001284393,NM_001284397,NM_023121,XM_006532231,XM_011248737,XM_017314274,XM_030245574	Gngt2	guanine nucleotide binding protein (G protein), gamma transducing activity polypeptide 2	protein_coding	NP_001033753.2;NP_001271322.1;NP_001271326.1;NP_075610.1;XP_006532294.1;XP_011247039.1;XP_017169763.1;XP_030101434.1	893584	.	45	94	52	77	58	69
14711	NM_001364890,NM_010321,XR_001782039	Gnmt	glycine N-methyltransferase	protein_coding	NP_001351819.1;NP_034451.1	1202304	.	15	2	0	3	4	0
14712	NM_010322	Gnpat	glyceronephosphate O-acyltransferase	protein_coding	NP_034452.3	1343460	.	2107	2197	2227	2056	2148	2112
14714	NM_008145,NR_133010,XM_006518564	Gnrh1	gonadotropin releasing hormone 1	protein_coding	NP_032171.1;XP_006518627.1	95789	.	0	5	6	0	3	0
14715	NM_001310651,NM_001310653,NM_010323,XM_017320667	Gnrhr	gonadotropin releasing hormone receptor	protein_coding	NP_001297580.1;NP_001297582.1;NP_034453.1;XP_017176156.1	95790	.	0	0	0	0	0	0
14718	NM_010324	Got1	glutamic-oxaloacetic transaminase 1, soluble	protein_coding	NP_034454.2	95791	.	13605	12778	14399	14105	14653	11780
14719	NM_010325	Got2	glutamatic-oxaloacetic transaminase 2, mitochondrial	protein_coding	NP_034455.1	95792	.	11485	11105	11623	11586	11870	9960
14720	gene-Got2-ps1	Got2-ps1	glutamatic-oxaloacetic transaminase 2, mitochondrial, pseudogene 1	pseudogene	.	104721	.	644	521	604	639	661	486
14723	NM_010326,XM_006532232	Gp1ba	glycoprotein 1b, alpha polypeptide	protein_coding	NP_034456.2;XP_006532295.1	1333744	.	0	0	0	4	0	0
14724	NM_001001999,NM_010327	Gp1bb	glycoprotein Ib, beta polypeptide	protein_coding	NP_001001999.1;NP_034457.1	107852	.	171	206	264	305	242	189
14725	NM_001081088	Lrp2	low density lipoprotein receptor-related protein 2	protein_coding	NP_001074557.1	95794	.	56	118	64	83	47	71
14726	NM_001290822,NM_010329	Pdpn	podoplanin	protein_coding	NP_001277751.1;NP_034459.2	103098	.	481	606	430	501	335	503
14727	NM_001291892,NM_001291893,NM_008147	Lilr4b	leukocyte immunoglobulin-like receptor, subfamily B, member 4B	protein_coding	NP_001278821.1;NP_001278822.1;NP_032173.1	102702	.	0	2	0	0	0	0
14728	NM_001291894,NM_013532,XM_030244886,XR_001779463,XR_003948594,XR_003948595,XR_871431,XR_871432,XR_871433	Lilrb4a	leukocyte immunoglobulin-like receptor, subfamily B, member 4A	protein_coding	NP_001278823.1;NP_038560.1;XP_030100746.1	102701	.	8	10	0	6	3	9
14729	NM_008148	Gp5	glycoprotein 5 (platelet)	protein_coding	NP_032174.2	1096363	.	55	43	65	65	46	26
14731	NM_010331,XM_017316432,XM_030248337	Gpaa1	GPI anchor attachment protein 1	protein_coding	NP_034461.1;XP_017171921.1;XP_030104197.1	1202392	.	954	878	1033	1012	1029	710
14732	NM_001356285,NM_008149,XM_006526692,XM_006526694,XM_011247147	Gpam	glycerol-3-phosphate acyltransferase, mitochondrial	protein_coding	NP_001343214.1;NP_032175.2;XP_006526755.1;XP_006526757.1;XP_011245449.1	109162	.	3250	5375	3915	4370	3199	4449
14733	NM_016696,XM_006529142,XM_011247925	Gpc1	glypican 1	protein_coding	NP_057905.1;XP_006529205.1;XP_011246227.1	1194891	.	7484	7104	8615	8032	6910	3993
14734	NM_016697	Gpc3	glypican 3	protein_coding	NP_057906.2	104903	.	74	73	99	125	127	112
14735	NM_008150,XM_011250978	Gpc4	glypican 4	protein_coding	NP_032176.2;XP_011249280.1	104902	.	1809	2001	1873	1926	1652	1708
14738	NM_001010941,NM_001359055,NM_001359056,NM_001359057,NM_001359058,NM_008151,XM_006504806,XM_030254133,XM_030254134	Gpr12	G-protein coupled receptor 12	protein_coding	NP_001010941.1;NP_001345984.1;NP_001345985.1;NP_001345986.1;NP_001345987.1;NP_032177.1;XP_006504869.1;XP_030109993.1;XP_030109994.1	101909	.	1074	1009	1141	1045	914	749
14739	NM_010333,XM_006510019	S1pr2	sphingosine-1-phosphate receptor 2	protein_coding	NP_034463.2;XP_006510082.1	99569	.	87	144	111	126	92	110
14744	NM_008152	Gpr65	G-protein coupled receptor 65	protein_coding	NP_032178.1	108031	.	9	36	10	13	12	17
14745	NM_001290486,NM_010336,NM_172989,XM_011249928,XM_011249929,XM_011249930,XM_011249931,XM_011249932,XM_011249933,XM_011249934,XM_011249935,XM_030253214,XM_030253215	Lpar1	lysophosphatidic acid receptor 1	protein_coding	NP_001277415.1;NP_034466.2;NP_766577.1;XP_011248230.1;XP_011248231.1;XP_011248232.1;XP_011248233.1;XP_011248234.1;XP_011248235.1;XP_011248236.1;XP_011248237.1;XP_030109074.1;XP_030109075.1	108429	.	1639	3116	2116	1912	1192	2063
14747	NM_001359060,NM_008153,XM_006530164,XM_006530165,XM_006530166	Cmklr1	chemokine-like receptor 1	protein_coding	NP_001345989.1;NP_032179.1;XP_006530227.1;XP_006530228.1;XP_006530229.1	109603	.	147	267	140	205	154	200
14748	NM_008154	Gpr3	G-protein coupled receptor 3	protein_coding	NP_032180.1	101908	.	204	171	241	214	216	136
14751	NM_008155	Gpi1	glucose-6-phosphate isomerase 1	protein_coding	NP_032181.2	95797	.	23389	23646	25732	25105	24913	18452
14755	NM_001291025,NM_001357592,NM_011822,XM_006523664,XM_017317256,XM_030249502,XM_030249503,XR_001782040,XR_003952089,XR_003952090,XR_385283	Pigq	phosphatidylinositol glycan anchor biosynthesis, class Q	protein_coding	NP_001277954.1;NP_001344521.1;NP_035952.2;XP_006523727.1;XP_017172745.1;XP_030105362.1;XP_030105363.1	1333114	.	3930	4545	4480	4375	4011	3514
14756	NM_008156,XM_011244282,XM_017315390,XM_017315391,XM_017315392,XM_030247157	Gpld1	glycosylphosphatidylinositol specific phospholipase D1	protein_coding	NP_032182.2;XP_011242584.1;XP_017170879.1;XP_017170880.1;XP_017170881.1;XP_030103017.1	106604	.	1321	1953	1489	1716	1435	1712
14758	NM_001177955,NM_001177956,NM_001177957,NM_001177958,NM_001177959,NM_001177960,NM_001177961,NM_001177962,NM_023122,XM_011247784,XM_017318385	Gpm6b	glycoprotein m6b	protein_coding	NP_001171426.1;NP_001171427.1;NP_001171428.1;NP_001171429.1;NP_001171430.1;NP_001171431.1;NP_001171432.1;NP_001171433.1;NP_075611.1;XP_011246086.1;XP_017173874.1	107672	.	45189	51091	46402	46636	40912	46471
14760	NM_001167694,NM_001167695,NM_001167696,NM_001167697,NM_001167699,NM_001167700,NM_001362048,NM_001362049,NM_001362050,NM_001362051,NM_001362052,NM_008157,NR_155270	Gpr19	G protein-coupled receptor 19	protein_coding	NP_001161166.1;NP_001161167.1;NP_001161168.1;NP_001161169.1;NP_001161171.1;NP_001161172.1;NP_001348977.1;NP_001348978.1;NP_001348979.1;NP_001348980.1;NP_001348981.1;NP_032183.2	892973	.	496	555	555	610	550	437
14761	NM_008158	Gpr27	G protein-coupled receptor 27	protein_coding	NP_032184.1	1202299	.	1399	1265	1606	1501	1763	1627
14762	NM_008159	Gpr33	G protein-coupled receptor 33	protein_coding	NP_032185.1	1277106	.	3	0	0	0	4	0
14763	NM_010338	Gpr37	G protein-coupled receptor 37	protein_coding	NP_034468.2	1313297	.	5078	8216	6198	5345	3635	5370
14764	NM_009962,XM_006526695,XM_006526696,XM_011247148	Ptgdr2	prostaglandin D2 receptor 2	protein_coding	NP_034092.1;XP_006526758.1;XP_006526759.1;XP_011245450.1	1330275	.	0	0	0	0	3	0
14765	NM_001308501,NM_010340,XM_006527827	Gpr50	G-protein-coupled receptor 50	protein_coding	NP_001295430.1;NP_034470.1;XP_006527890.1	1333877	.	22	43	18	12	16	11
14766	NM_001198894,NM_018882,XM_006530680,XM_006530681,XM_006530683,XM_006530685,XM_006530686,XM_006530687,XM_006530688,XM_006530689,XM_006530690,XM_006530691,XM_006530692,XM_006530693,XM_006530694,XM_006530695,XM_006530696,XM_006530697,XM_017312577,XM_030243299	Adgrg1	adhesion G protein-coupled receptor G1	protein_coding	NP_001185823.1;NP_061370.2;XP_006530743.1;XP_006530744.1;XP_006530746.1;XP_006530748.1;XP_006530749.1;XP_006530750.1;XP_006530751.1;XP_006530752.1;XP_006530753.1;XP_006530754.1;XP_006530755.1;XP_006530756.1;XP_006530757.1;XP_006530758.1;XP_006530759.1;XP_006530760.1;XP_017168066.1;XP_030099159.1	1340051	.	2901	4554	3296	3541	3154	3675
14767	NM_001319227,NM_010341	Nmur1	neuromedin U receptor 1	protein_coding	NP_001306156.1;NP_034471.1	1341898	.	3	4	0	5	0	0
14768	NM_001190984,NM_001190985,NM_021295,XM_011238435	Lancl1	LanC (bacterial lantibiotic synthetase component C)-like 1	protein_coding	NP_001177913.1;NP_001177914.1;NP_067270.1;XP_011236737.1	1336997	.	7030	7202	7398	7715	7183	6338
14772	NM_001080743,NM_019497,XM_006503742,XM_017320670,XM_017320671,XM_030254135,XM_030254136,XM_030254137,XM_030254138,XR_003955582,XR_003955583,XR_003955584,XR_003955585	Grk4	G protein-coupled receptor kinase 4	protein_coding	NP_001074212.1;NP_062370.2;XP_006503805.1;XP_017176159.1;XP_017176160.1;XP_030109995.1;XP_030109996.1;XP_030109997.1;XP_030109998.1	95801	.	73	58	55	74	46	59
14773	NM_018869,XM_006526697,XM_011247149,XM_017318066	Grk5	G protein-coupled receptor kinase 5	protein_coding	NP_061357.3;XP_006526760.1;XP_011245451.1;XP_017173555.1	109161	.	499	545	558	540	498	577
14775	NM_001329527,NM_001329528,NM_008160	Gpx1	glutathione peroxidase 1	protein_coding	NP_001316456.1;NP_001316457.1;NP_032186.2	104887	.	1429	1553	1606	1686	1516	1274
14776	NM_030677	Gpx2	glutathione peroxidase 2	protein_coding	NP_109602.2	106609	.	0	2	0	0	0	0
14777	NR_033563	Gpx2-ps1	glutathione peroxidase 2, pseudogene 1	transcribed_pseudogene	.	106627	.	0	0	0	0	0	0
14778	NM_001329860,NM_008161	Gpx3	glutathione peroxidase 3	protein_coding	NP_001316789.1;NP_032187.2	105102	.	75	67	83	76	104	121
14780	NM_010343,XM_011244283	Gpx5	glutathione peroxidase 5	protein_coding	NP_034473.2;XP_011242585.1	104886	.	0	0	0	0	0	0
14782	NM_010344	Gsr	glutathione reductase	protein_coding	NP_034474.4	95804	.	890	1115	945	1011	888	812
14783	NM_001177629,NM_001370603,NM_010345,XM_011243664	Grb10	growth factor receptor bound protein 10	protein_coding	NP_001171100.1;NP_001357532.1;NP_034475.2;XP_011241966.1	103232	.	852	740	792	861	974	953
14784	NM_001313936,NM_001313937,NM_008163	Grb2	growth factor receptor bound protein 2	protein_coding	NP_001300865.1;NP_001300866.1;NP_032189.1	95805	.	6436	6996	6860	6678	6626	5220
14786	NM_010346,XM_006532233,XM_030245575	Grb7	growth factor receptor bound protein 7	protein_coding	NP_034476.1;XP_006532296.1;XP_030101435.1	102683	.	11	7	10	9	9	15
14787	NM_001163465,NM_008164,XM_006520447,XM_017316433,XM_017316434	Rhpn1	rhophilin, Rho GTPase binding protein 1	protein_coding	NP_001156937.1;NP_032190.2;XP_006520510.1;XP_017171922.1;XP_017171923.1	1098783	.	166	171	177	157	164	156
14788	NM_001355257,NM_013533,XM_006505555,XM_006505557,XM_011241215,XM_030255168,XR_003956164	Gpr162	G protein-coupled receptor 162	protein_coding	NP_001342186.1;NP_038561.1;XP_006505618.1;XP_006505620.1;XP_011239517.1;XP_030111028.1	1315214	.	5592	5365	5850	5626	6023	4674
14789	NM_013534,NR_163804,NR_163805,NR_163806,XM_030255169	P3h3	prolyl 3-hydroxylase 3	protein_coding	NP_038562.2;XP_030111029.1	1315208	.	233	237	179	202	191	221
14790	NM_013535	Grcc10	gene rich cluster, C10 gene	protein_coding	NP_038563.1	1315201	.	2045	2430	2607	2568	2466	2164
14791	NM_013536,XM_030255170	Emg1	EMG1 N1-specific pseudouridine methyltransferase	protein_coding	NP_038564.1;XP_030111030.1	1315195	.	806	960	831	894	840	720
14792	NM_145130,NR_149320,XR_377423	Lpcat3	lysophosphatidylcholine acyltransferase 3	protein_coding	NP_660112.1	1315211	.	714	995	784	785	661	764
14793	NM_013538,XM_006505564	Cdca3	cell division cycle associated 3	protein_coding	NP_038566.1;XP_006505627.1	1315198	.	30	27	27	17	21	20
14794	NM_001306050,NM_001306051,NM_001306052,NM_001306053,NM_013539,XM_006505566,XM_006505567,XM_030255171,XM_030255172,XM_030255173	Spsb2	splA/ryanodine receptor domain and SOCS box containing 2	protein_coding	NP_001292979.1;NP_001292980.1;NP_001292981.1;NP_001292982.1;NP_038567.1;XP_006505629.2;XP_006505630.1;XP_030111031.1;XP_030111032.1;XP_030111033.1	1315199	.	41	80	49	70	39	69
14797	NM_001276288,NM_010347,NR_074087	Tle5	TLE family member 5, transcriptional modulator	protein_coding	NP_001263217.1;NP_034477.1	95806	.	12294	12847	14439	14059	13395	10261
14799	NM_001113325,NM_001252403,NM_008165,XM_006532234,XM_017314275,XR_388348	Gria1	glutamate receptor, ionotropic, AMPA1 (alpha 1)	protein_coding	NP_001106796.1;NP_001239332.1;NP_032191.2;XP_006532297.1;XP_017169764.1	95808	.	49905	43739	53681	52254	52035	46434
14800	NM_001039195,NM_001083806,NM_001357924,NM_001357927,NM_013540,NR_152147,NR_152148,NR_152149,XM_006501014,XM_006501015,XR_001783652,XR_001783653,XR_001783654,XR_001783655,XR_001783656,XR_001783657,XR_001783660,XR_001783662,XR_003954282,XR_003954283,XR_003954284,XR_003954285,XR_003954286,XR_003954287,XR_003954288,XR_003954289,XR_003954290,XR_003954291,XR_375488	Gria2	glutamate receptor, ionotropic, AMPA2 (alpha 2)	protein_coding	NP_001034284.2;NP_001077275.2;NP_001344853.2;NP_001344856.2;NP_038568.3;XP_006501077.1;XP_006501078.1	95809	.	26781	23458	27992	27051	25776	27480
14802	NM_001113180,NM_001113181,NM_019691,XM_006509841,XM_006509842,XM_006509843,XM_006509844,XM_006509845,XM_011242355,XR_001778797,XR_001778798,XR_001778799,XR_001778800,XR_379084,XR_379085	Gria4	glutamate receptor, ionotropic, AMPA4 (alpha 4)	protein_coding	NP_001106651.2;NP_001106652.1;NP_062665.4;XP_006509904.1;XP_006509905.1;XP_006509906.1;XP_006509907.1;XP_006509908.1;XP_011240657.1	95811	.	2168	1994	2173	2046	1964	2019
14803	NM_008166,XM_006518565,XM_006518566,XM_006518567,XM_011244962	Grid1	glutamate receptor, ionotropic, delta 1	protein_coding	NP_032192.2;XP_006518628.1;XP_006518629.1;XP_006518630.1;XP_011243264.1	95812	.	3155	2891	3452	3341	3232	3042
14804	NM_001370966,NM_008167	Grid2	glutamate receptor, ionotropic, delta 2	protein_coding	NP_001357895.1;NP_032193.1	95813	.	510	512	515	423	411	458
14805	NM_001346964,NM_010348,NM_146072,XM_006522914,XM_006522915,XM_006522916,XM_006522918,XM_006522919,XM_006522920,XM_006522921,XM_017316880,XR_384929,XR_384930	Grik1	glutamate receptor, ionotropic, kainate 1	protein_coding	NP_001333893.2;NP_034478.2;NP_666184.3;XP_006522977.1;XP_006522978.1;XP_006522979.1;XP_006522981.1;XP_006522982.1;XP_006522983.1;XP_006522984.1;XP_017172369.1	95814	.	333	336	366	257	360	335
14806	NM_001111268,NM_001358866,NM_010349,XM_006512545,XM_011243120,XM_011243121,XM_011243122,XM_011243123,XM_011243124,XM_011243125,XM_011243127,XM_030244887,XR_001779464,XR_001779465,XR_003948597	Grik2	glutamate receptor, ionotropic, kainate 2 (beta 2)	protein_coding	NP_001104738.2;NP_001345795.2;NP_034479.3;XP_006512608.1;XP_011241422.1;XP_011241423.1;XP_011241424.1;XP_011241425.1;XP_011241426.1;XP_011241427.1;XP_011241429.1;XP_030100747.1	95815	.	2514	2684	2460	2672	2232	2117
14807	NM_001081097,XM_006502772,XM_017319980	Grik3	glutamate receptor, ionotropic, kainate 3	protein_coding	NP_001074566.1;XP_006502835.1;XP_017175469.1	95816	.	1362	1328	1614	1444	1423	989
14809	NM_001360067,NM_008168,XM_006539552,XM_017321983,XM_030242142,XM_030242143,XM_030242144,XM_030242145,XM_030242146,XM_030242147,XM_030242148,XM_030242149	Grik5	glutamate receptor, ionotropic, kainate 5 (gamma 2)	protein_coding	NP_001346996.1;NP_032194.2;XP_006539615.1;XP_017177472.1;XP_030098002.1;XP_030098003.1;XP_030098004.1;XP_030098005.1;XP_030098006.1;XP_030098007.1;XP_030098008.1;XP_030098009.1	95818	.	9271	8875	10684	9921	9626	7647
14810	NM_001177656,NM_001177657,NM_001372558,NM_001372559,NM_001372560,NM_001372561,NM_001372562,NM_008169	Grin1	glutamate receptor, ionotropic, NMDA1 (zeta 1)	protein_coding	NP_001171127.1;NP_001171128.1;NP_001359487.1;NP_001359488.1;NP_001359489.1;NP_001359490.1;NP_001359491.1;NP_032195.1	95819	.	20934	17111	25342	20856	20394	15818
14811	NM_008170,XM_006521795	Grin2a	glutamate receptor, ionotropic, NMDA2A (epsilon 1)	protein_coding	NP_032196.2;XP_006521858.1	95820	.	14942	12494	15620	13869	12515	13118
14812	NM_001363750,NM_008171,XM_006505573,XM_006505574,XM_006505575,XM_011241221,XM_017321396	Grin2b	glutamate receptor, ionotropic, NMDA2B (epsilon 2)	protein_coding	NP_001350679.1;NP_032197.3;XP_006505636.1;XP_006505637.1;XP_006505638.1;XP_011239523.1;XP_017176885.1	95821	.	19998	17889	24863	20259	18944	20109
14813	NM_010350,XM_006532242,XM_011248738,XM_011248739,XM_011248741,XM_011248742,XM_011248743,XM_017314276,XM_017314277,XM_017314278,XM_017314279,XM_017314280,XM_030245576,XR_388349	Grin2c	glutamate receptor, ionotropic, NMDA2C (epsilon 3)	protein_coding	NP_034480.2;XP_006532305.1;XP_011247040.1;XP_011247041.1;XP_011247043.1;XP_011247044.1;XP_011247045.1;XP_017169765.1;XP_017169766.1;XP_017169767.1;XP_017169768.1;XP_017169769.1;XP_030101436.1	95822	.	1182	1550	1670	1499	1340	1271
14814	NM_008172,XM_006540631,XM_011250800,XM_011250802,XM_011250804,XM_030242150,XM_030242151,XM_030242152,XM_030242153	Grin2d	glutamate receptor, ionotropic, NMDA2D (epsilon 4)	protein_coding	NP_032198.2;XP_006540694.2;XP_011249102.1;XP_011249104.1;XP_011249106.2;XP_030098010.1;XP_030098011.1;XP_030098012.1;XP_030098013.1	95823	.	330	276	388	336	390	336
14815	NM_001361209,NM_001361210,NM_001361211,NM_001361212,NM_008173,XM_006525658,XM_006525659,XM_006525660,XM_006525661,XM_006525662,XM_006525663,XM_006525664,XM_006525665,XM_030250338,XM_030250339	Nr3c1	nuclear receptor subfamily 3, group C, member 1	protein_coding	NP_001348138.1;NP_001348139.1;NP_001348140.1;NP_001348141.1;NP_032199.3;XP_006525721.1;XP_006525722.1;XP_006525723.1;XP_006525724.1;XP_006525725.1;XP_006525726.1;XP_006525727.1;XP_006525728.1;XP_030106198.1;XP_030106199.1	95824	.	3734	4336	3970	3798	3447	4317
14816	NM_001114333,NM_016976,XM_006512549,XM_006512550,XM_006512551,XM_006512554	Grm1	glutamate receptor, metabotropic 1	protein_coding	NP_001107805.1;NP_058672.1;XP_006512612.1;XP_006512613.1;XP_006512614.1;XP_006512617.1	1351338	.	2871	2908	3192	2992	2495	1908
14823	NM_001311072,NM_001361125,NM_008174,XM_006504989,XM_006504990,XM_006504991,XM_030255174,XM_030255175	Grm8	glutamate receptor, metabotropic 8	protein_coding	NP_001298001.1;NP_001348054.1;NP_032200.2;XP_006505052.1;XP_006505053.1;XP_006505054.1;XP_030111034.1;XP_030111035.1	1351345	.	124	95	116	85	128	74
14824	NM_008175	Grn	granulin	protein_coding	NP_032201.3	95832	.	2408	3254	2556	2844	2415	2634
14825	NM_008176	Cxcl1	chemokine (C-X-C motif) ligand 1	protein_coding	NP_032202.1	108068	.	5	0	0	4	4	0
14827	NM_007952	Pdia3	protein disulfide isomerase associated 3	protein_coding	NP_031978.2	95834	.	8630	9596	8539	9176	9032	9058
14828	NM_001163434,NM_022310	Hspa5	heat shock protein 5	protein_coding	NP_001156906.1;NP_071705.3	95835	.	11806	12360	10845	12022	13703	15008
14829	NM_008177	Grpr	gastrin releasing peptide receptor	protein_coding	NP_032203.1	95836	.	41	27	45	40	44	20
14836	NM_010351	Gsc	goosecoid homeobox	protein_coding	NP_034481.1	95841	.	0	0	0	0	0	0
14840	NM_001080552,NM_001080553,NM_010352	Gsg1	germ cell associated 1	protein_coding	NP_001074021.1;NP_001074022.1;NP_034482.2	1194499	.	0	12	9	8	5	7
14841	NM_010353	Haspin	histone H3 associated protein kinase	protein_coding	NP_034483.1	1194498	.	7	7	8	4	4	9
14842	NM_008178	Gsx1	GS homeobox 1	protein_coding	NP_032204.1	95842	.	10	11	7	19	13	6
14843	NM_133256	Gsx2	GS homeobox 2	protein_coding	NP_573555.1	95843	.	13	6	7	18	8	8
14852	NM_001130008,NM_146066	Gspt1	G1 to S phase transition 1	protein_coding	NP_001123480.1;NP_666178.2	1316728	.	6225	6363	5900	5975	5686	6121
14853	NM_008179	Gspt2	G1 to S phase transition 2	protein_coding	NP_032205.2	1316727	.	1059	1091	1185	1256	1263	1116
14854	NM_001291111,NM_008180,XM_006498781	Gss	glutathione synthetase	protein_coding	NP_001278040.1;NP_032206.1;XP_006498844.1	95852	.	634	827	789	756	665	586
14857	NM_008181	Gsta1	glutathione S-transferase, alpha 1 (Ya)	protein_coding	NP_032207.3	1095417	.	0	0	3	0	0	0
14858	NM_008182,XM_006510814	Gsta2	glutathione S-transferase, alpha 2 (Yc2)	protein_coding	NP_032208.2;XP_006510877.1	95863	.	0	0	0	0	0	0
14859	NM_001077353,NM_001288617,NM_010356,XM_030248789	Gsta3	glutathione S-transferase, alpha 3	protein_coding	NP_001070821.1;NP_001275546.1;NP_034486.2;XP_030104649.1	95856	.	6	8	9	9	9	8
14860	NM_010357	Gsta4	glutathione S-transferase, alpha 4	protein_coding	NP_034487.2	1309515	.	1321	1232	1259	1422	1354	1491
14862	NM_001374678,NM_010358	Gstm1	glutathione S-transferase, mu 1	protein_coding	NP_001361607.1;NP_034488.1	95860	.	7916	11258	8487	9979	8027	9460
14863	NM_008183	Gstm2	glutathione S-transferase, mu 2	protein_coding	NP_032209.1	95861	.	87	59	40	81	62	61
14864	NM_010359	Gstm3	glutathione S-transferase, mu 3	protein_coding	NP_034489.1	106026	.	3	0	0	6	0	3
14865	NM_001160411,NM_026764,XM_006501018,XM_006501020,XM_006501021,XM_017319462	Gstm4	glutathione S-transferase, mu 4	protein_coding	NP_001153883.1;NP_081040.1;XP_006501081.1;XP_006501083.1;XP_006501084.1;XP_017174951.1	95862	.	369	472	420	459	367	385
14866	NM_010360	Gstm5	glutathione S-transferase, mu 5	protein_coding	NP_034490.1	1309466	.	5058	6997	5626	6398	5606	6057
14867	NM_001379504,NM_001379505,NM_001379506,NM_001379507,NM_001379508,NM_001379509,NM_001379510,NM_008184,XM_006501023,XM_006501025,XM_030252433	Gstm6	glutathione S-transferase, mu 6	protein_coding	NP_001366433.1;NP_001366434.1;NP_001366435.1;NP_001366436.1;NP_001366437.1;NP_001366438.1;NP_001366439.1;NP_032210.3;XP_006501086.1;XP_006501088.1;XP_030108293.1	1309467	.	207	317	257	288	202	159
14869	NM_181796	Gstp2	glutathione S-transferase, pi 2	protein_coding	NP_861461.1	95864	.	671	938	711	802	644	794
14870	NM_013541	Gstp1	glutathione S-transferase, pi 1	protein_coding	NP_038569.1	95865	.	3594	4982	4221	4283	3818	3734
14871	NM_001358778,NM_008185	Gstt1	glutathione S-transferase, theta 1	protein_coding	NP_001345707.1;NP_032211.3	107379	.	153	218	172	180	187	179
14872	NM_010361,XM_006513240,XM_006513241,XM_011243373,XM_017313805,XM_030244889	Gstt2	glutathione S-transferase, theta 2	protein_coding	NP_034491.2;XP_006513303.1;XP_006513304.1;XP_011241675.1;XP_017169294.1;XP_030100749.1	106188	.	47	53	30	27	44	51
14873	NM_010362	Gsto1	glutathione S-transferase omega 1	protein_coding	NP_034492.1	1342273	.	1359	1549	1419	1409	1307	1033
14874	NM_001252555,NM_001252556,NM_001364306,NM_001364307,NM_010363,XM_006515474,XM_006515475	Gstz1	glutathione transferase zeta 1 (maleylacetoacetate isomerase)	protein_coding	NP_001239484.1;NP_001239485.1;NP_001351235.1;NP_001351236.1;NP_034493.1;XP_006515537.1;XP_006515538.1	1341859	.	893	1200	877	920	903	836
14884	NM_001291075,NM_001360075,NM_001360076,NM_008186	Gtf2h1	general transcription factor II H, polypeptide 1	protein_coding	NP_001278004.1;NP_001347004.1;NP_001347005.1;NP_032212.3	1277216	.	1425	1409	1415	1511	1526	1472
14885	NM_010364,XM_006523668,XM_006523669,XM_030249504	Gtf2h4	general transcription factor II H, polypeptide 4	protein_coding	NP_034494.1;XP_006523731.1;XP_006523732.1;XP_030105364.1	1338799	.	391	448	490	441	468	386
14886	NM_001080746,NM_001080747,NM_001080748,NM_001080749,NM_001359062,NM_001359063,NM_001359064,NM_001359065,NM_001359066,NM_001359067,NM_010365,XM_006504384,XM_006504385,XM_006504386,XM_006504389,XM_006504391,XM_017320677,XM_017320681,XM_030254140,XM_030254141,XM_030254143,XM_030254144,XM_030254145,XM_030254146,XM_030254147,XM_030254148,XM_030254149,XM_030254150,XM_030254151,XM_030254152,XM_030254153…	Gtf2i	general transcription factor II I	protein_coding	NP_001074215.1;NP_001074216.1;NP_001074217.1;NP_001074218.1;NP_001345991.1;NP_001345992.1;NP_001345993.1;NP_001345994.1;NP_001345995.1;NP_001345996.1;NP_034495.2;XP_006504447.1;XP_006504448.1;XP_006504449.1;XP_006504452.1;XP_006504454.1;XP_017176166.1;XP_017176170.1;XP_030110000.1;XP_030110001.1;XP_030110003.1;XP_030110004.1;XP_030110005.1;XP_030110006.1;XP_030110007.1;XP_030110008.1;XP_030110009…	1202722	.	10563	10802	10699	10587	10175	9597
14894	NM_008187	Cfap20	cilia and flagella associated protein 20	protein_coding	NP_032213.2	107428	.	922	1069	932	1029	988	831
14897	NM_133975,XM_006496409,XM_006496414,XM_006496416,XM_006496422,XM_006496427,XM_006496429,XM_011238654,XM_011238655,XM_011238656,XM_011238657,XM_011238658,XM_011238659,XM_011238660,XM_011238661,XM_011238662,XM_011238663,XM_011238664,XM_011238665,XM_011238666,XM_011238667,XM_011238668,XM_011238669,XM_011238670,XM_011238671,XM_011238672,XM_011238673,XM_011238674,XM_017316627,XM_017316673,XM_030248874…	Trip12	thyroid hormone receptor interactor 12	protein_coding	NP_598736.4;XP_006496472.1;XP_006496477.1;XP_006496479.1;XP_006496485.1;XP_006496490.1;XP_006496492.1;XP_011236956.1;XP_011236957.1;XP_011236958.1;XP_011236959.1;XP_011236960.1;XP_011236961.1;XP_011236962.1;XP_011236963.1;XP_011236964.1;XP_011236965.1;XP_011236966.1;XP_011236967.1;XP_011236968.1;XP_011236969.1;XP_011236970.1;XP_011236971.1;XP_011236972.1;XP_011236973.1;XP_011236974.1;XP_011236975…	1309481	.	8127	8089	8322	7865	7571	8160
14904	NM_013818,XM_006520450	Gtpbp1	GTP binding protein 1	protein_coding	NP_038846.2;XP_006520513.1	109443	.	2133	2286	2520	2467	2318	2155
14910	NR_027008,NR_027009,NR_027010	Gt(ROSA)26Sor	gene trap ROSA 26, Philippe Soriano	lncRNA	.	104735	.	145	114	136	128	137	144
14911	NM_001355266,NM_008188,XM_006505578,XM_006505579	Thumpd3	THUMP domain containing 3	protein_coding	NP_001342195.1;NP_032214.1;XP_006505641.1;XP_006505642.1	1277973	.	1170	1108	1076	1133	1132	1126
14912	NM_183248,NR_027857	Nkx6-2	NK6 homeobox 2	protein_coding	NP_899071.2	1352738	.	310	612	482	320	227	401
14913	NM_008189,XM_011246296,XR_001782041	Guca1a	guanylate cyclase activator 1a (retina)	protein_coding	NP_032215.2;XP_011244598.1	102770	.	4	7	4	7	3	0
14915	NM_008190	Guca2a	guanylate cyclase activator 2a (guanylin)	protein_coding	NP_032216.1	102738	.	0	0	0	0	0	0
14916	NM_008191	Guca2b	guanylate cyclase activator 2b (retina)	protein_coding	NP_032217.2	1270851	.	0	0	0	0	0	0
14917	NM_001127318,NM_145067	Gucy2c	guanylate cyclase 2c	protein_coding	NP_001120790.1;NP_659504.2	106903	.	5	15	3	7	7	13
14918	NM_001130693	Gucy2d	guanylate cyclase 2d	protein_coding	NP_001124165.1	106030	.	0	3	0	0	0	0
14919	NM_008192,XM_006532244,XM_030245578	Gucy2e	guanylate cyclase 2e	protein_coding	NP_032218.2;XP_006532307.1;XP_030101438.1	105123	.	185	305	234	195	195	229
14923	NM_001159410,NM_008193,XM_006532245,XM_006532246,XM_030245579	Guk1	guanylate kinase 1	protein_coding	NP_001152882.1;NP_032219.2;XP_006532308.1;XP_006532309.1;XP_030101439.1	95871	.	2610	2701	2907	2940	2790	2499
14924	NM_001029850,NM_001083320,NM_001083321,NM_001286784,NM_001286785,NM_001286786,NM_001286788,NM_010367,NR_104594,XM_006505580,XM_006505581,XM_006505582,XM_006505583,XM_006505584,XM_006505585,XM_006505586,XM_006505587,XM_006505588,XM_006505589,XM_006505590,XM_006505591,XM_006505592,XM_006505593,XM_006505594,XM_006505595,XM_006505596,XM_006505597,XM_006505598,XM_006505599,XM_006505600,XM_006505601,XM…	Magi1	membrane associated guanylate kinase, WW and PDZ domain containing 1	protein_coding	NP_001025021.1;NP_001076789.1;NP_001076790.1;NP_001273713.1;NP_001273714.1;NP_001273715.1;NP_001273717.1;NP_034497.1;XP_006505643.1;XP_006505644.1;XP_006505645.1;XP_006505646.1;XP_006505647.1;XP_006505648.1;XP_006505649.1;XP_006505650.1;XP_006505651.1;XP_006505652.1;XP_006505653.1;XP_006505654.1;XP_006505655.1;XP_006505656.1;XP_006505657.1;XP_006505658.1;XP_006505659.1;XP_006505660.1;XP_006505661…	1203522	.	2253	2866	2458	2426	2030	1945
14933	NM_001294138,NM_001294140,NM_001331046,NM_008194,NM_212444,XM_006527829,XM_006527831,XM_006527833	Gk	glycerol kinase	protein_coding	NP_001281067.1;NP_001281069.1;NP_001317975.1;NP_032220.1;NP_997609.1;XP_006527892.1;XP_006527894.1;XP_006527896.1	106594	.	1303	1371	1358	1324	1329	1199
14934	NM_010369	Gypa	glycophorin A	protein_coding	NP_034499.3	95880	.	0	0	0	0	0	0
14936	NM_030678	Gys1	glycogen synthase 1, muscle	protein_coding	NP_109603.2	101805	.	725	708	699	666	682	637
14938	NM_010370	Gzma	granzyme A	protein_coding	NP_034500.1	109266	.	0	0	1	0	0	0
14939	NM_013542	Gzmb	granzyme B	protein_coding	NP_038570.1	109267	.	0	0	0	0	0	0
14940	NM_010371,XM_006518568,XM_011244963	Gzmc	granzyme C	protein_coding	NP_034501.2;XP_006518631.1;XP_011243265.1	109256	.	0	0	0	0	0	0
14941	NM_010372,XM_006518569	Gzmd	granzyme D	protein_coding	NP_034502.2;XP_006518632.2	109255	.	0	0	0	0	0	0
14942	NM_010373	Gzme	granzyme E	protein_coding	NP_034503.2	109265	.	0	0	0	0	0	0
14943	NM_010374	Gzmf	granzyme F	protein_coding	NP_034504.1	109254	.	0	0	0	0	0	0
14944	NM_010375	Gzmg	granzyme G	protein_coding	NP_034505.1	109253	.	0	0	0	0	0	0
14945	NM_008196	Gzmk	granzyme K	protein_coding	NP_032222.1	1298232	.	0	0	0	0	0	5
14950	NM_001159551,NM_001159552,NM_001159553,NM_010376,XM_006498783,XM_017315666,XM_030247570,XR_001780858,XR_003950808,XR_374416	H13	histocompatibility 13	protein_coding	NP_001153023.1;NP_001153024.1;NP_001153025.1;NP_034506.1;XP_006498846.1;XP_017171155.1;XP_030103430.1	95886	.	1997	2136	2083	2079	2174	2138
14955	NR_130973,NR_130974	H19	H19, imprinted maternally expressed transcript	lncRNA	.	95891	.	0	2	2	2	0	0
14957	NM_145713	H1f3	H1.3 linker histone, cluster member	protein_coding	NP_663759.3	107502	.	4	3	6	2	5	6
14958	NM_008197	H1f0	H1.0 linker histone	protein_coding	NP_032223.2	95893	.	3222	3730	3553	3770	3433	3737
14960	NM_010378	H2-Aa	histocompatibility 2, class II antigen A, alpha	protein_coding	NP_034508.2	95895	.	56	61	12	12	15	31
14961	NM_207105	H2-Ab1	histocompatibility 2, class II antigen A, beta 1	protein_coding	NP_996988.2	103070	.	52	64	14	21	20	33
14962	NM_001142706,NM_008198,XM_006523671,XM_006523672	Cfb	complement factor B	protein_coding	NP_001136178.1;NP_032224.2;XP_006523734.1;XP_006523735.1	105975	.	12	12	8	5	8	21
14963	NR_160676	H2-Bl	histocompatibility 2, blastocyst	transcribed_pseudogene	.	892004	.	0	0	3	0	0	0
14964	NM_010380	H2-D1	histocompatibility 2, D region locus 1	protein_coding	NP_034510.3	95896	.	1488	2916	1481	2002	1175	2050
14969	NM_010382	H2-Eb1	histocompatibility 2, class II antigen E beta	protein_coding	NP_034512.2	95901	.	37	63	28	46	26	34
14972	NM_001001892,NM_001347346,XM_006523673,XM_006523674,XM_006523676,XM_006523677,XM_006523678,XM_017317258,XM_017317259,XM_030249505,XM_030249506	H2-K1	histocompatibility 2, K1, K region	protein_coding	NP_001001892.2;NP_001334275.1;XP_006523736.1;XP_006523737.1;XP_006523739.1;XP_006523740.1;XP_006523741.1;XP_017172747.1;XP_017172748.1;XP_030105365.1;XP_030105366.1	95904	.	991	2048	1000	1385	863	1451
14976	NM_001185182,NM_010385	Pfdn6	prefoldin subunit 6	protein_coding	NP_001172111.1;NP_034515.1	95908	.	1147	1182	1167	1141	1160	1252
14977	NM_001077709,NM_008202	Slc39a7	solute carrier family 39 (zinc transporter), member 7	protein_coding	NP_001071177.1;NP_032228.2	95909	.	3154	3590	3372	3413	3092	2923
14979	NM_013543	H2-Ke6	H2-K region expressed gene 6	protein_coding	NP_038571.2	95911	.	422	531	515	559	486	492
14985	NM_001360498,NM_013544	H2-M10.1	histocompatibility 2, M region locus 10.1	protein_coding	NP_001347427.1;NP_038572.3	1276522	.	0	0	0	0	0	0
14990	NM_001347387	H2-M2	histocompatibility 2, M region locus 2	protein_coding	NP_001334316.1	95914	.	0	0	0	0	0	0
14991	NM_013819	H2-M3	histocompatibility 2, M region locus 3	protein_coding	NP_038847.1	95915	.	64	109	49	51	62	68
14997	NM_001368317,NM_008205	H2-M9	histocompatibility 2, M region locus 9	protein_coding	NP_001355246.1;NP_032231.1	1276570	.	0	0	0	0	0	0
14998	NM_001360530,NM_010386,XM_006523684,XM_017317260,XM_030249508	H2-DMa	histocompatibility 2, class II, locus DMa	protein_coding	NP_001347459.1;NP_034516.3;XP_006523747.1;XP_017172749.1;XP_030105368.1	95921	.	511	590	575	641	517	459
14999	NM_010387	H2-DMb1	histocompatibility 2, class II, locus Mb1	protein_coding	NP_034517.2	95922	.	66	75	51	69	48	57
15000	NM_010388,NR_160895,NR_160896	H2-DMb2	histocompatibility 2, class II, locus Mb2	protein_coding	NP_034518.1	95923	.	9	7	9	12	6	9
15001	NM_008206	H2-Oa	histocompatibility 2, O region alpha locus	protein_coding	NP_032232.2	95924	.	7	36	9	22	12	31
15002	NM_010389,XM_006523686	H2-Ob	histocompatibility 2, O region beta locus	protein_coding	NP_034519.2;XP_006523749.1	95925	.	19	47	19	27	9	40
15006	NM_001358790,NM_010390,XM_006523687,XM_006523688,XM_006523689,XM_006523690,XM_006523691,XM_006523692,XM_011246300,XM_011246301,XM_011246302,XM_017317262,XM_030249510	H2-Q1	histocompatibility 2, Q region locus 1	protein_coding	NP_001345719.1;NP_034520.2;XP_006523750.1;XP_006523751.1;XP_006523752.1;XP_006523753.1;XP_006523754.1;XP_006523755.1;XP_011244602.1;XP_011244603.1;XP_011244604.1;XP_017172751.1;XP_030105370.1	95928	.	14	37	16	20	17	0
15007	NM_010391	H2-Q10	histocompatibility 2, Q region locus 10	protein_coding	NP_034521.1	95929	.	0	0	0	4	0	0
15013	NM_001368740,NM_010392	H2-Q2	histocompatibility 2, Q region locus 2	protein_coding	NP_001355669.1;NP_034522.2	95931	.	0	5	4	0	0	0
15015	NM_001143689	H2-Q4	histocompatibility 2, Q region locus 4	protein_coding	NP_001137161.1	95933	.	112	341	152	175	94	178
15016	NR_051981	H2-Q5	histocompatibility 2, Q region locus 5	transcribed_pseudogene	.	95934	.	3	5	9	0	4	7
15018	NM_001198560,NM_001198561,NM_010394,XR_385292	H2-Q7	histocompatibility 2, Q region locus 7	protein_coding	NP_001185489.1;NP_001185490.1;NP_034524.3	95936	.	28	63	18	25	9	26
15024	NR_046286	H2-T10	histocompatibility 2, T region locus 10	transcribed_pseudogene	.	95942	.	31	37	36	34	37	21
15039	NM_001347382,NM_001359754,NM_001359755,NM_001359756,NM_010397	H2-T22	histocompatibility 2, T region locus 22	protein_coding	NP_001334311.1;NP_001346683.1;NP_001346684.1;NP_001346685.1;NP_034527.1	95956	.	521	712	557	564	524	557
15040	NM_010398	H2-T23	histocompatibility 2, T region locus 23	protein_coding	NP_034528.1	95957	.	263	420	221	297	195	316
15042	NM_008207,XM_011246306,XM_011246307,XM_011246308,XM_030249511	H2-T24	histocompatibility 2, T region locus 24	protein_coding	NP_032233.2;XP_011244608.1;XP_011244609.1;XP_011244610.1;XP_030105371.1	95958	.	40	69	70	35	44	60
15043	NM_008208	H2-T3	histocompatibility 2, T region locus 3	protein_coding	NP_032234.3	95959	.	0	0	0	0	0	0
15061	NM_031367	Ifi44l	interferon-induced protein 44 like	protein_coding	NP_112735.1	95975	.	0	0	0	1	0	0
15064	NM_001355062,NM_001355063,NM_008209	Mr1	major histocompatibility complex, class I-related	protein_coding	NP_001341991.1;NP_001341992.1;NP_032235.1	1195463	.	292	362	234	245	180	284
15077	NM_178216	H3c14	H3 clustered histone 14	protein_coding	NP_835734.2	2448355	.	23	43	60	41	47	57
15078	NM_008210	H3f3a	H3.3 histone A	protein_coding	NP_032236.1	1097686	.	4469	5540	4496	4657	4153	4308
15079	gene-H3f3a-ps1	H3f3a-ps1	H3.3 histone A, pseudogene 1	pseudogene	.	1101782	.	225	247	177	217	207	254
15080	gene-H3f3a-ps2	H3f3a-ps2	H3.3 histone A, pseudogene 2	pseudogene	.	1101758	.	194	209	144	185	174	192
15081	NM_008211,XM_006532248	H3f3b	H3.3 histone B	protein_coding	NP_032237.1;XP_006532311.1	1101768	.	6207	7870	6266	6668	5966	6495
15107	NM_008212	Hadh	hydroxyacyl-Coenzyme A dehydrogenase	protein_coding	NP_032238.2	96009	.	884	1452	1041	1078	848	1048
15108	NM_016763	Hsd17b10	hydroxysteroid (17-beta) dehydrogenase 10	protein_coding	NP_058043.3	1333871	.	842	1115	897	966	888	926
15109	NM_010401	Hal	histidine ammonia lyase	protein_coding	NP_034531.1	96010	.	0	0	0	0	0	0
15110	NM_008213	Hand1	heart and neural crest derivatives expressed 1	protein_coding	NP_032239.1	103577	.	0	0	0	0	0	0
15111	NM_010402	Hand2	heart and neural crest derivatives expressed 2	protein_coding	NP_034532.3	103580	.	0	0	0	0	0	0
15112	NM_010403	Hao1	hydroxyacid oxidase 1, liver	protein_coding	NP_034533.1	96011	.	0	0	0	4	0	2
15114	NM_001359052,NM_010404,NM_177981,XM_011248744,XM_011248745,XM_030245580,XM_030245581	Hap1	huntingtin-associated protein 1	protein_coding	NP_001345981.1;NP_034534.1;NP_817090.1;XP_011247046.1;XP_011247047.1;XP_030101440.1;XP_030101441.1	1261831	.	2613	2801	2751	2971	4277	4655
15115	NM_008214	Hars	histidyl-tRNA synthetase	protein_coding	NP_032240.3	108087	.	3315	3487	3150	3468	3404	3250
15116	NM_008215,XM_011246309	Has1	hyaluronan synthase 1	protein_coding	NP_032241.1;XP_011244611.1	106590	.	35	26	43	25	18	19
15117	NM_008216	Has2	hyaluronan synthase 2	protein_coding	NP_032242.3	107821	.	15	16	13	17	6	19
15118	NM_001331048,NM_008217,XM_006530700,XM_006530701,XM_030243300	Has3	hyaluronan synthase 3	protein_coding	NP_001317977.1;NP_032243.2;XP_006530763.1;XP_006530764.1;XP_030099160.1	109599	.	138	129	185	136	132	63
15122	NM_008218	Hba-a1	hemoglobin alpha, adult chain 1	protein_coding	NP_032244.2	96015	.	1221	1825	1773	1900	2079	1899
15126	NM_010405	Hba-x	hemoglobin X, alpha-like embryonic chain in Hba complex	protein_coding	NP_034535.1	96019	.	0	0	0	0	0	0
15132	NM_008219	Hbb-bh1	hemoglobin Z, beta-like embryonic chain	protein_coding	NP_032245.1	96024	.	0	0	0	0	0	0
15135	NM_008221	Hbb-y	hemoglobin Y, beta-like embryonic chain	protein_coding	NP_032247.1	96027	.	0	0	0	3	0	0
15139	NM_010406,XM_017315669	Hc	hemolytic complement	protein_coding	NP_034536.3;XP_017171158.1	96031	.	13	25	9	8	6	13
15159	NM_001331049,NM_001331050,NM_008222,XM_006528705	Hccs	holocytochrome c synthetase	protein_coding	NP_001317978.1;NP_001317979.1;NP_032248.3;XP_006528768.1	106911	.	733	891	805	737	730	679
15160	NM_001331047,NM_008223	Serpind1	serine (or cysteine) peptidase inhibitor, clade D, member 1	protein_coding	NP_001317976.1;NP_032249.3	96051	.	122	168	145	140	79	111
15161	NM_008224,XM_006527835,XM_006527836,XM_017318387	Hcfc1	host cell factor C1	protein_coding	NP_032250.2;XP_006527898.1;XP_006527899.1;XP_017173876.1	105942	.	5097	5432	6378	5521	4625	4280
15162	NM_001172117,NM_010407	Hck	hemopoietic cell kinase	protein_coding	NP_001165588.1;NP_034537.2	96052	.	66	133	72	85	81	132
15163	NM_008225	Hcls1	hematopoietic cell specific Lyn substrate 1	protein_coding	NP_032251.2	104568	.	174	297	203	224	181	239
15165	NM_010408	Hcn1	hyperpolarization activated cyclic nucleotide gated potassium channel 1	protein_coding	NP_034538.2	1096392	.	3188	2121	3088	2684	3166	3341
15166	NM_008226	Hcn2	hyperpolarization-activated, cyclic nucleotide-gated K+ 2	protein_coding	NP_032252.1	1298210	.	4217	4447	5224	4707	4615	3799
15168	NM_008227,XM_030252434,XR_003954292	Hcn3	hyperpolarization-activated, cyclic nucleotide-gated K+ 3	protein_coding	NP_032253.1;XP_030108294.1	1298211	.	290	314	301	315	310	252
15170	NM_001077705,NM_013545,XM_030255191	Ptpn6	protein tyrosine phosphatase, non-receptor type 6	protein_coding	NP_001071173.1;NP_038573.2;XP_030111051.1	96055	.	111	258	134	170	114	206
15171	NM_010410	Hcrt	hypocretin	protein_coding	NP_034540.1	1202306	.	2	2	5	0	0	7
15181	gene-Hdac1-ps	Hdac1-ps	histone deacetylase 1, pseudogene	pseudogene	.	3704479	.	22	17	15	18	12	24
[truncated: 43,616 more rows]
